# Supplementary material for: Impact of old age on resectable colorectal cancer outcomes
Source: PeerJ. 2019 Feb 15;7:e6350. doi: 10.7717/peerj.6350 (PMC6378948; doi:10.7717/peerj.6350)
Supplement: Supplemental Information 1 [file peerj-07-6350-s001.xlsx]

## Sheet: Sheet1
Patient ID	Year of diagnosis	Sex	Age at diagnosis	Race recode (W, B, AI, API)	Marital status at diagnosis	Site recode ICD-O-3/WHO 2008	ICD-O-3 Hist/behav, malignant	Primary Site - labeled	Grade	SEER modified AJCC stage 3rd (1988-2003)	Derived AJCC Stage Group, 6th ed (2004+)	Derived AJCC T, 7th ed (2010+)	T value - based on AJCC 3rd (1988-2003)	Derived AJCC T, 6th ed (2004+)	Derived AJCC N, 7th ed (2010+)	N value - based on AJCC 3rd (1988-2003)	Derived AJCC N, 6th ed (2004+)	RX Summ--Surg Prim Site (1998+)	RX Summ--Scope Reg LN Sur (2003+)	Scope of reg lymph nd surg (1998-2002)	RX Summ--Reg LN Examined (1998-2002)	CS tumor size (2004+)	CS extension (2004+)	CS Tumor Size/Ext Eval (2004+)	CS lymph nodes (2004+)	CS Reg Node Eval (2004+)	Regional nodes examined (1988+)	Regional nodes positive (1988+)	CS site-specific factor 1 (2004+ varying by schema)	Radiation sequence with surgery	Radiation	SEER cause-specific death classification	SEER other cause of death classification	Survival months	COD to site rec KM	Sequence number	Month of diagnosis	Chemotherapy recode (yes, no/unk)
4396204	2008	Female	56	White	Married (including common law)	Sigmoid Colon	8140/3: Adenocarcinoma, NOS	C18.7-Sigmoid colon	Moderately differentiated; Grade II	Blank(s)	IIA	Blank(s)	Blank(s)	T3	Blank(s)	Blank(s)	N0	30	4 or more regional lymph nodes removed	Blank(s)	Blank(s)	35	450	3	0	3	25	0	20	No radiation and/or cancer-directed surgery	None	Alive or dead of other cause	Alive or dead due to cancer	60	Alive	One primary only	December	No/Unknown
4403864	2007	Female	65	White	Widowed	Cecum	8140/3: Adenocarcinoma, NOS	C18.0-Cecum	Moderately differentiated; Grade II	Blank(s)	IIIC	Blank(s)	Blank(s)	T3	Blank(s)	Blank(s)	N2	40	4 or more regional lymph nodes removed	Blank(s)	Blank(s)	52	400	3	300	3	13	5	20	No radiation and/or cancer-directed surgery	None	Dead (attributable to this cancer dx)	Alive or dead due to cancer	21	Colon excluding Rectum	One primary only	January	Yes
4407964	2005	Female	80	White	Single (never married)	Splenic Flexure	8140/3: Adenocarcinoma, NOS	C18.5-Splenic flexure of colon	Moderately differentiated; Grade II	Blank(s)	I	Blank(s)	Blank(s)	T1	Blank(s)	Blank(s)	N0	40	4 or more regional lymph nodes removed	Blank(s)	Blank(s)	10	160	3	0	3	15	0	999	No radiation and/or cancer-directed surgery	None	Alive or dead of other cause	Alive or dead due to cancer	98	Alive	One primary only	October	No/Unknown
4447595	2004	Female	80	White	Married (including common law)	Transverse Colon	8140/3: Adenocarcinoma, NOS	C18.4-Transverse colon	Moderately differentiated; Grade II	Blank(s)	IIIB	Blank(s)	Blank(s)	T3	Blank(s)	Blank(s)	N1	30	4 or more regional lymph nodes removed	Blank(s)	Blank(s)	40	400	3	800	3	11	1	999	No radiation and/or cancer-directed surgery	None	Alive or dead of other cause	Dead (attributable to causes other than this cancer dx)	1	Chronic Obstructive Pulmonary Disease and Allied Cond	One primary only	February	No/Unknown
4447930	2004	Female	58	White	Divorced	Rectum	8140/3: Adenocarcinoma, NOS	C20.9-Rectum, NOS	Moderately differentiated; Grade II	Blank(s)	IIIB	Blank(s)	Blank(s)	T3	Blank(s)	Blank(s)	N1	30	4 or more regional lymph nodes removed	Blank(s)	Blank(s)	40	450	3	300	3	25	2	10	No radiation and/or cancer-directed surgery	None	Alive or dead of other cause	Alive or dead due to cancer	116	Alive	One primary only	April	Yes
4448088	2004	Male	62	White	Married (including common law)	Sigmoid Colon	8140/3: Adenocarcinoma, NOS	C18.7-Sigmoid colon	Moderately differentiated; Grade II	Blank(s)	IIA	Blank(s)	Blank(s)	T3	Blank(s)	Blank(s)	N0	30	4 or more regional lymph nodes removed	Blank(s)	Blank(s)	999	458	3	0	3	5	0	999	No radiation and/or cancer-directed surgery	None	Alive or dead of other cause	Alive or dead due to cancer	118	Alive	One primary only	February	Yes
4448288	2004	Female	40	White	Married (including common law)	Rectum	8140/3: Adenocarcinoma, NOS	C20.9-Rectum, NOS	Moderately differentiated; Grade II	Blank(s)	IIIA	Blank(s)	Blank(s)	T2	Blank(s)	Blank(s)	N1	30	4 or more regional lymph nodes removed	Blank(s)	Blank(s)	30	200	3	300	3	6	1	998	No radiation and/or cancer-directed surgery	None	Alive or dead of other cause	Alive or dead due to cancer	118	Alive	One primary only	February	Yes
4448352	2004	Male	71	White	Married (including common law)	Rectosigmoid Junction	8140/3: Adenocarcinoma, NOS	C19.9-Rectosigmoid junction	Moderately differentiated; Grade II	Blank(s)	I	Blank(s)	Blank(s)	T2	Blank(s)	Blank(s)	N0	30	4 or more regional lymph nodes removed	Blank(s)	Blank(s)	45	200	3	0	3	7	0	998	No radiation and/or cancer-directed surgery	None	Alive or dead of other cause	Dead (attributable to causes other than this cancer dx)	103	Other Infectious and Parasitic Diseases including HIV	One primary only	March	No/Unknown
4448375	2004	Male	56	Asian or Pacific Islander	Married (including common law)	Rectum	8140/3: Adenocarcinoma, NOS	C20.9-Rectum, NOS	Moderately differentiated; Grade II	Blank(s)	IIA	Blank(s)	Blank(s)	T3	Blank(s)	Blank(s)	N0	30	4 or more regional lymph nodes removed	Blank(s)	Blank(s)	33	450	3	0	3	9	0	20	No radiation and/or cancer-directed surgery	None	Dead (attributable to this cancer dx)	Alive or dead due to cancer	107	Rectum and Rectosigmoid Junction	One primary only	March	No/Unknown
4448422	2004	Male	60	Black	Married (including common law)	Hepatic Flexure	8490/3: Signet ring cell carcinoma	C18.3-Hepatic flexure of colon	Poorly differentiated; Grade III	Blank(s)	IIIC	Blank(s)	Blank(s)	T3	Blank(s)	Blank(s)	N2	40	4 or more regional lymph nodes removed	Blank(s)	Blank(s)	999	450	3	300	3	7	7	999	No radiation and/or cancer-directed surgery	None	Dead (attributable to this cancer dx)	Alive or dead due to cancer	11	Colon excluding Rectum	One primary only	April	Yes
4448478	2004	Female	53	Black	Married (including common law)	Rectosigmoid Junction	8140/3: Adenocarcinoma, NOS	C19.9-Rectosigmoid junction	Poorly differentiated; Grade III	Blank(s)	IIIB	Blank(s)	Blank(s)	T3	Blank(s)	Blank(s)	N1	30	4 or more regional lymph nodes removed	Blank(s)	Blank(s)	25	400	5	100	5	4	0	20	Radiation prior to surgery	Beam radiation	Alive or dead of other cause	Alive or dead due to cancer	119	Alive	One primary only	January	Yes
4448496	2004	Female	44	White	Married (including common law)	Sigmoid Colon	8140/3: Adenocarcinoma, NOS	C18.7-Sigmoid colon	Moderately differentiated; Grade II	Blank(s)	IIIB	Blank(s)	Blank(s)	T3	Blank(s)	Blank(s)	N1	30	4 or more regional lymph nodes removed	Blank(s)	Blank(s)	45	400	3	200	3	11	2	999	No radiation and/or cancer-directed surgery	None	Dead (attributable to this cancer dx)	Alive or dead due to cancer	69	Colon excluding Rectum	One primary only	February	Yes
4448508	2004	Male	53	White	Married (including common law)	Rectosigmoid Junction	8140/3: Adenocarcinoma, NOS	C19.9-Rectosigmoid junction	Poorly differentiated; Grade III	Blank(s)	IIIC	Blank(s)	Blank(s)	T3	Blank(s)	Blank(s)	N2	30	4 or more regional lymph nodes removed	Blank(s)	Blank(s)	10	450	3	300	3	12	10	999	No radiation and/or cancer-directed surgery	None	Alive or dead of other cause	Alive or dead due to cancer	117	Alive	One primary only	March	Yes
4448513	2004	Male	69	White	Single (never married)	Rectum	8140/3: Adenocarcinoma, NOS	C20.9-Rectum, NOS	Moderately differentiated; Grade II	Blank(s)	IIB	Blank(s)	Blank(s)	T4	Blank(s)	Blank(s)	N0	0	None	Blank(s)	Blank(s)	60	610	1	0	0	0	98	20	No radiation and/or cancer-directed surgery	Beam radiation	Dead (attributable to this cancer dx)	Alive or dead due to cancer	12	Rectum and Rectosigmoid Junction	One primary only	March	Yes
4448524	2004	Female	70	White	Single (never married)	Ascending Colon	8140/3: Adenocarcinoma, NOS	C18.2-Ascending colon	Poorly differentiated; Grade III	Blank(s)	IIIB	Blank(s)	Blank(s)	T3	Blank(s)	Blank(s)	N1	40	4 or more regional lymph nodes removed	Blank(s)	Blank(s)	31	450	3	110	3	24	2	10	No radiation and/or cancer-directed surgery	None	Dead (attributable to this cancer dx)	Alive or dead due to cancer	100	Colon excluding Rectum	One primary only	February	Yes
4448546	2004	Male	68	Black	Single (never married)	Hepatic Flexure	8140/3: Adenocarcinoma, NOS	C18.3-Hepatic flexure of colon	Moderately differentiated; Grade II	Blank(s)	IIA	Blank(s)	Blank(s)	T3	Blank(s)	Blank(s)	N0	40	4 or more regional lymph nodes removed	Blank(s)	Blank(s)	20	450	3	0	3	6	0	999	No radiation and/or cancer-directed surgery	None	Dead (attributable to this cancer dx)	Alive or dead due to cancer	37	Colon excluding Rectum	One primary only	February	No/Unknown
4448554	2004	Female	69	White	Married (including common law)	Hepatic Flexure	8140/3: Adenocarcinoma, NOS	C18.3-Hepatic flexure of colon	Moderately differentiated; Grade II	Blank(s)	IIA	Blank(s)	Blank(s)	T3	Blank(s)	Blank(s)	N0	40	4 or more regional lymph nodes removed	Blank(s)	Blank(s)	32	400	3	0	3	26	0	999	No radiation and/or cancer-directed surgery	None	Alive or dead of other cause	Alive or dead due to cancer	117	Alive	One primary only	March	Yes
4448574	2004	Female	73	Asian or Pacific Islander	Separated	Descending Colon	8140/3: Adenocarcinoma, NOS	C18.6-Descending colon	Moderately differentiated; Grade II	Blank(s)	IIIB	Blank(s)	Blank(s)	T3	Blank(s)	Blank(s)	N1	40	4 or more regional lymph nodes removed	Blank(s)	Blank(s)	27	450	3	300	3	10	1	999	No radiation and/or cancer-directed surgery	None	Alive or dead of other cause	Alive or dead due to cancer	119	Alive	One primary only	January	Yes
4448590	2004	Female	60	White	Married (including common law)	Cecum	8140/3: Adenocarcinoma, NOS	C18.0-Cecum	Moderately differentiated; Grade II	Blank(s)	IIIB	Blank(s)	Blank(s)	T3	Blank(s)	Blank(s)	N1	40	4 or more regional lymph nodes removed	Blank(s)	Blank(s)	40	400	3	300	3	33	3	998	No radiation and/or cancer-directed surgery	None	Dead (attributable to this cancer dx)	Alive or dead due to cancer	69	Colon excluding Rectum	One primary only	May	No/Unknown
4448593	2004	Female	53	Asian or Pacific Islander	Married (including common law)	Sigmoid Colon	8140/3: Adenocarcinoma, NOS	C18.7-Sigmoid colon	Moderately differentiated; Grade II	Blank(s)	IIIB	Blank(s)	Blank(s)	T3	Blank(s)	Blank(s)	N1	30	4 or more regional lymph nodes removed	Blank(s)	Blank(s)	67	450	3	100	3	11	1	998	No radiation and/or cancer-directed surgery	None	Alive or dead of other cause	Alive or dead due to cancer	103	Alive	One primary only	January	Yes
4448608	2004	Female	47	White	Married (including common law)	Sigmoid Colon	8140/3: Adenocarcinoma, NOS	C18.7-Sigmoid colon	Moderately differentiated; Grade II	Blank(s)	IIIB	Blank(s)	Blank(s)	T3	Blank(s)	Blank(s)	N1	30	4 or more regional lymph nodes removed	Blank(s)	Blank(s)	30	450	3	300	3	18	2	20	No radiation and/or cancer-directed surgery	None	Alive or dead of other cause	Alive or dead due to cancer	119	Alive	One primary only	January	Yes
4448620	2004	Male	73	White	Divorced	Rectosigmoid Junction	8140/3: Adenocarcinoma, NOS	C19.9-Rectosigmoid junction	Moderately differentiated; Grade II	Blank(s)	IIIA	Blank(s)	Blank(s)	T2	Blank(s)	Blank(s)	N1	30	4 or more regional lymph nodes removed	Blank(s)	Blank(s)	20	200	3	300	3	8	2	999	Radiation after surgery	Beam radiation	Dead (attributable to this cancer dx)	Alive or dead due to cancer	74	Rectum and Rectosigmoid Junction	One primary only	January	Yes
4448688	2004	Male	79	White	Married (including common law)	Ascending Colon	8140/3: Adenocarcinoma, NOS	C18.2-Ascending colon	Poorly differentiated; Grade III	Blank(s)	IIIC	Blank(s)	Blank(s)	T3	Blank(s)	Blank(s)	N2	40	4 or more regional lymph nodes removed	Blank(s)	Blank(s)	50	450	3	300	3	23	7	998	No radiation and/or cancer-directed surgery	None	Dead (attributable to this cancer dx)	Alive or dead due to cancer	3	Colon excluding Rectum	One primary only	May	No/Unknown
4448842	2004	Female	74	White	Married (including common law)	Cecum	8140/3: Adenocarcinoma, NOS	C18.0-Cecum	Moderately differentiated; Grade II	Blank(s)	IIA	Blank(s)	Blank(s)	T3	Blank(s)	Blank(s)	N0	40	4 or more regional lymph nodes removed	Blank(s)	Blank(s)	85	450	3	0	3	11	0	998	No radiation and/or cancer-directed surgery	None	Alive or dead of other cause	Dead (attributable to causes other than this cancer dx)	23	Other Cause of Death	One primary only	January	No/Unknown
4448955	2004	Female	68	Asian or Pacific Islander	Divorced	Sigmoid Colon	8140/3: Adenocarcinoma, NOS	C18.7-Sigmoid colon	Moderately differentiated; Grade II	Blank(s)	IIIC	Blank(s)	Blank(s)	T3	Blank(s)	Blank(s)	N2	30	4 or more regional lymph nodes removed	Blank(s)	Blank(s)	25	450	3	300	3	10	4	998	No radiation and/or cancer-directed surgery	None	Alive or dead of other cause	Alive or dead due to cancer	119	Alive	One primary only	January	Yes
4448980	2004	Female	67	White	Married (including common law)	Cecum	8480/3: Mucinous adenocarcinoma	C18.0-Cecum	Poorly differentiated; Grade III	Blank(s)	IIA	Blank(s)	Blank(s)	T3	Blank(s)	Blank(s)	N0	40	4 or more regional lymph nodes removed	Blank(s)	Blank(s)	40	450	3	0	3	7	0	20	No radiation and/or cancer-directed surgery	None	Alive or dead of other cause	Alive or dead due to cancer	119	Alive	One primary only	January	No/Unknown
4449061	2004	Female	30	Asian or Pacific Islander	Single (never married)	Sigmoid Colon	8140/3: Adenocarcinoma, NOS	C18.7-Sigmoid colon	Moderately differentiated; Grade II	Blank(s)	IIIB	Blank(s)	Blank(s)	T3	Blank(s)	Blank(s)	N1	30	4 or more regional lymph nodes removed	Blank(s)	Blank(s)	55	400	3	100	3	17	3	10	No radiation and/or cancer-directed surgery	None	Dead (attributable to this cancer dx)	Alive or dead due to cancer	86	Colon excluding Rectum	One primary only	January	Yes
4449085	2004	Male	52	White	Married (including common law)	Splenic Flexure	8140/3: Adenocarcinoma, NOS	C18.5-Splenic flexure of colon	Moderately differentiated; Grade II	Blank(s)	IIA	Blank(s)	Blank(s)	T3	Blank(s)	Blank(s)	N0	30	4 or more regional lymph nodes removed	Blank(s)	Blank(s)	80	400	3	0	3	51	0	20	No radiation and/or cancer-directed surgery	None	Alive or dead of other cause	Alive or dead due to cancer	118	Alive	One primary only	February	No/Unknown
4450113	2004	Male	76	White	Married (including common law)	Sigmoid Colon	8140/3: Adenocarcinoma, NOS	C18.7-Sigmoid colon	Moderately differentiated; Grade II	Blank(s)	IIIB	Blank(s)	Blank(s)	T3	Blank(s)	Blank(s)	N1	30	4 or more regional lymph nodes removed	Blank(s)	Blank(s)	35	400	3	300	3	7	0	999	No radiation and/or cancer-directed surgery	None	Alive or dead of other cause	Dead (attributable to causes other than this cancer dx)	53	Pneumonia and Influenza	One primary only	January	No/Unknown
4450197	2004	Female	51	White	Divorced	Rectum	8140/3: Adenocarcinoma, NOS	C20.9-Rectum, NOS	Moderately differentiated; Grade II	Blank(s)	IIIC	Blank(s)	Blank(s)	T2	Blank(s)	Blank(s)	N2	50	4 or more regional lymph nodes removed	Blank(s)	Blank(s)	25	200	3	100	3	16	4	10	Radiation after surgery	Beam radiation	Alive or dead of other cause	Alive or dead due to cancer	113	Alive	One primary only	July	Yes
4450224	2004	Female	66	Asian or Pacific Islander	Married (including common law)	Transverse Colon	8140/3: Adenocarcinoma, NOS	C18.4-Transverse colon	Moderately differentiated; Grade II	Blank(s)	IIB	Blank(s)	Blank(s)	T4	Blank(s)	Blank(s)	N0	40	4 or more regional lymph nodes removed	Blank(s)	Blank(s)	999	500	3	0	3	16	0	10	No radiation and/or cancer-directed surgery	None	Alive or dead of other cause	Alive or dead due to cancer	116	Alive	One primary only	April	Yes
4450265	2004	Female	80	White	Married (including common law)	Cecum	8140/3: Adenocarcinoma, NOS	C18.0-Cecum	Moderately differentiated; Grade II	Blank(s)	IIIC	Blank(s)	Blank(s)	T4	Blank(s)	Blank(s)	N2	40	4 or more regional lymph nodes removed	Blank(s)	Blank(s)	35	550	3	300	3	13	4	999	No radiation and/or cancer-directed surgery	None	Alive or dead of other cause	Dead (attributable to causes other than this cancer dx)	12	Pneumonia and Influenza	One primary only	March	Yes
4450271	2004	Male	47	White	Married (including common law)	Rectum	8140/3: Adenocarcinoma, NOS	C20.9-Rectum, NOS	Moderately differentiated; Grade II	Blank(s)	IIA	Blank(s)	Blank(s)	T3	Blank(s)	Blank(s)	N0	0	None	Blank(s)	Blank(s)	999	400	0	0	0	0	98	20	No radiation and/or cancer-directed surgery	Beam radiation	Alive or dead of other cause	Alive or dead due to cancer	117	Alive	One primary only	March	Yes
4450273	2004	Female	43	White	Married (including common law)	Rectum	8140/3: Adenocarcinoma, NOS	C20.9-Rectum, NOS	Moderately differentiated; Grade II	Blank(s)	IIIB	Blank(s)	Blank(s)	T3	Blank(s)	Blank(s)	N1	30	1 to 3 regional lymph nodes removed	Blank(s)	Blank(s)	60	450	5	300	5	2	0	20	Radiation prior to surgery	Beam radiation	Alive or dead of other cause	Alive or dead due to cancer	119	Alive	One primary only	January	No/Unknown
4450275	2004	Male	70	Black	Married (including common law)	Cecum	8140/3: Adenocarcinoma, NOS	C18.0-Cecum	Moderately differentiated; Grade II	Blank(s)	IIA	Blank(s)	Blank(s)	T3	Blank(s)	Blank(s)	N0	40	4 or more regional lymph nodes removed	Blank(s)	Blank(s)	30	400	3	0	3	8	0	999	No radiation and/or cancer-directed surgery	None	Alive or dead of other cause	Alive or dead due to cancer	119	Alive	One primary only	January	No/Unknown
4450277	2004	Male	78	White	Married (including common law)	Cecum	8140/3: Adenocarcinoma, NOS	C18.0-Cecum	Moderately differentiated; Grade II	Blank(s)	IIA	Blank(s)	Blank(s)	T3	Blank(s)	Blank(s)	N0	40	4 or more regional lymph nodes removed	Blank(s)	Blank(s)	50	400	3	0	3	8	0	20	No radiation and/or cancer-directed surgery	None	Dead (attributable to this cancer dx)	Alive or dead due to cancer	4	Colon excluding Rectum	One primary only	January	No/Unknown
4450316	2004	Male	70	White	Married (including common law)	Rectum	8140/3: Adenocarcinoma, NOS	C20.9-Rectum, NOS	Moderately differentiated; Grade II	Blank(s)	IIIB	Blank(s)	Blank(s)	T3	Blank(s)	Blank(s)	N1	50	4 or more regional lymph nodes removed	Blank(s)	Blank(s)	40	400	5	100	5	4	1	20	Radiation prior to surgery	Beam radiation	Alive or dead of other cause	Alive or dead due to cancer	117	Alive	One primary only	March	Yes
4450433	2004	Male	70	White	Married (including common law)	Rectosigmoid Junction	8480/3: Mucinous adenocarcinoma	C19.9-Rectosigmoid junction	Well differentiated; Grade I	Blank(s)	I	Blank(s)	Blank(s)	T2	Blank(s)	Blank(s)	N0	30	1 to 3 regional lymph nodes removed	Blank(s)	Blank(s)	23	200	3	0	3	3	0	999	No radiation and/or cancer-directed surgery	None	Alive or dead of other cause	Alive or dead due to cancer	118	Alive	One primary only	February	No/Unknown
4450445	2004	Female	74	White	Married (including common law)	Cecum	8140/3: Adenocarcinoma, NOS	C18.0-Cecum	Well differentiated; Grade I	Blank(s)	IIA	Blank(s)	Blank(s)	T3	Blank(s)	Blank(s)	N0	40	4 or more regional lymph nodes removed	Blank(s)	Blank(s)	30	400	3	0	3	8	0	999	No radiation and/or cancer-directed surgery	None	Alive or dead of other cause	Dead (attributable to causes other than this cancer dx)	95	Chronic Obstructive Pulmonary Disease and Allied Cond	One primary only	February	No/Unknown
4450527	2004	Male	65	White	Married (including common law)	Cecum	8140/3: Adenocarcinoma, NOS	C18.0-Cecum	Poorly differentiated; Grade III	Blank(s)	IIIB	Blank(s)	Blank(s)	T3	Blank(s)	Blank(s)	N1	40	4 or more regional lymph nodes removed	Blank(s)	Blank(s)	35	400	3	100	3	8	3	10	No radiation and/or cancer-directed surgery	None	Alive or dead of other cause	Alive or dead due to cancer	117	Alive	One primary only	March	Yes
4450531	2004	Female	64	White	Divorced	Sigmoid Colon	8140/3: Adenocarcinoma, NOS	C18.7-Sigmoid colon	Moderately differentiated; Grade II	Blank(s)	I	Blank(s)	Blank(s)	T2	Blank(s)	Blank(s)	N0	30	1 to 3 regional lymph nodes removed	Blank(s)	Blank(s)	30	200	3	0	3	3	0	20	No radiation and/or cancer-directed surgery	None	Alive or dead of other cause	Alive or dead due to cancer	118	Alive	One primary only	February	No/Unknown
4450533	2004	Female	61	White	Married (including common law)	Rectum	8140/3: Adenocarcinoma, NOS	C20.9-Rectum, NOS	Moderately differentiated; Grade II	Blank(s)	IIA	Blank(s)	Blank(s)	T3	Blank(s)	Blank(s)	N0	50	1 to 3 regional lymph nodes removed	Blank(s)	Blank(s)	50	458	6	0	6	3	0	10	Radiation prior to surgery	Beam radiation	Dead (attributable to this cancer dx)	Alive or dead due to cancer	97	Rectum and Rectosigmoid Junction	One primary only	May	Yes
4450585	2004	Female	80	White	Widowed	Cecum	8140/3: Adenocarcinoma, NOS	C18.0-Cecum	Moderately differentiated; Grade II	Blank(s)	IIIB	Blank(s)	Blank(s)	T3	Blank(s)	Blank(s)	N1	41	4 or more regional lymph nodes removed	Blank(s)	Blank(s)	30	400	3	300	3	6	1	998	No radiation and/or cancer-directed surgery	None	Dead (attributable to this cancer dx)	Alive or dead due to cancer	25	Colon excluding Rectum	One primary only	January	No/Unknown
4450603	2004	Male	61	White	Married (including common law)	Hepatic Flexure	8140/3: Adenocarcinoma, NOS	C18.3-Hepatic flexure of colon	Poorly differentiated; Grade III	Blank(s)	I	Blank(s)	Blank(s)	T2	Blank(s)	Blank(s)	N0	40	4 or more regional lymph nodes removed	Blank(s)	Blank(s)	25	200	3	0	3	12	0	998	No radiation and/or cancer-directed surgery	None	Alive or dead of other cause	Alive or dead due to cancer	117	Alive	One primary only	March	No/Unknown
4450615	2004	Female	70	White	Married (including common law)	Cecum	8140/3: Adenocarcinoma, NOS	C18.0-Cecum	Moderately differentiated; Grade II	Blank(s)	I	Blank(s)	Blank(s)	T2	Blank(s)	Blank(s)	N0	40	4 or more regional lymph nodes removed	Blank(s)	Blank(s)	30	200	3	0	3	4	0	20	No radiation and/or cancer-directed surgery	None	Alive or dead of other cause	Alive or dead due to cancer	119	Alive	One primary only	January	No/Unknown
4450652	2004	Female	61	Asian or Pacific Islander	Married (including common law)	Ascending Colon	8140/3: Adenocarcinoma, NOS	C18.2-Ascending colon	Moderately differentiated; Grade II	Blank(s)	IIIB	Blank(s)	Blank(s)	T3	Blank(s)	Blank(s)	N1	40	4 or more regional lymph nodes removed	Blank(s)	Blank(s)	50	458	3	300	3	37	2	10	No radiation and/or cancer-directed surgery	None	Alive or dead of other cause	Alive or dead due to cancer	117	Alive	One primary only	March	No/Unknown
4451157	2004	Female	64	White	Divorced	Rectosigmoid Junction	8140/3: Adenocarcinoma, NOS	C19.9-Rectosigmoid junction	Moderately differentiated; Grade II	Blank(s)	IIIA	Blank(s)	Blank(s)	T2	Blank(s)	Blank(s)	N1	30	4 or more regional lymph nodes removed	Blank(s)	Blank(s)	32	200	3	100	3	9	1	20	No radiation and/or cancer-directed surgery	None	Alive or dead of other cause	Alive or dead due to cancer	117	Alive	One primary only	March	No/Unknown
4451260	2004	Female	56	White	Single (never married)	Rectosigmoid Junction	8140/3: Adenocarcinoma, NOS	C19.9-Rectosigmoid junction	Moderately differentiated; Grade II	Blank(s)	IIIA	Blank(s)	Blank(s)	T2	Blank(s)	Blank(s)	N1	30	1 to 3 regional lymph nodes removed	Blank(s)	Blank(s)	38	200	3	100	3	2	2	998	No radiation and/or cancer-directed surgery	None	Alive or dead of other cause	Alive or dead due to cancer	117	Alive	One primary only	March	Yes
4451266	2004	Male	64	Black	Married (including common law)	Rectum	8140/3: Adenocarcinoma, NOS	C20.9-Rectum, NOS	Poorly differentiated; Grade III	Blank(s)	IIB	Blank(s)	Blank(s)	T4	Blank(s)	Blank(s)	N0	50	4 or more regional lymph nodes removed	Blank(s)	Blank(s)	22	610	6	0	6	8	0	20	Radiation prior to surgery	Beam radiation	Alive or dead of other cause	Alive or dead due to cancer	117	Alive	One primary only	March	Yes
4451384	2004	Male	76	White	Married (including common law)	Cecum	8140/3: Adenocarcinoma, NOS	C18.0-Cecum	Moderately differentiated; Grade II	Blank(s)	IIIB	Blank(s)	Blank(s)	T3	Blank(s)	Blank(s)	N1	40	4 or more regional lymph nodes removed	Blank(s)	Blank(s)	50	400	3	300	3	12	2	20	No radiation and/or cancer-directed surgery	None	Alive or dead of other cause	Dead (attributable to causes other than this cancer dx)	67	Other Cause of Death	One primary only	March	No/Unknown
4451454	2004	Male	80	White	Married (including common law)	Sigmoid Colon	8140/3: Adenocarcinoma, NOS	C18.7-Sigmoid colon	Moderately differentiated; Grade II	Blank(s)	IIA	Blank(s)	Blank(s)	T3	Blank(s)	Blank(s)	N0	30	4 or more regional lymph nodes removed	Blank(s)	Blank(s)	30	400	3	0	3	9	0	20	No radiation and/or cancer-directed surgery	None	Dead (attributable to this cancer dx)	Alive or dead due to cancer	64	Colon excluding Rectum	One primary only	January	No/Unknown
4451542	2004	Female	63	White	Married (including common law)	Transverse Colon	8140/3: Adenocarcinoma, NOS	C18.4-Transverse colon	Moderately differentiated; Grade II	Blank(s)	I	Blank(s)	Blank(s)	T2	Blank(s)	Blank(s)	N0	30	4 or more regional lymph nodes removed	Blank(s)	Blank(s)	40	200	3	0	3	25	0	999	No radiation and/or cancer-directed surgery	None	Dead (attributable to this cancer dx)	Alive or dead due to cancer	50	Colon excluding Rectum	One primary only	March	No/Unknown
4451547	2004	Male	76	White	Married (including common law)	Cecum	8140/3: Adenocarcinoma, NOS	C18.0-Cecum	Moderately differentiated; Grade II	Blank(s)	IIIB	Blank(s)	Blank(s)	T3	Blank(s)	Blank(s)	N1	40	4 or more regional lymph nodes removed	Blank(s)	Blank(s)	32	400	3	100	3	13	1	998	No radiation and/or cancer-directed surgery	None	Dead (attributable to this cancer dx)	Alive or dead due to cancer	61	Colon excluding Rectum	One primary only	March	Yes
4451616	2004	Male	57	Asian or Pacific Islander	Married (including common law)	Sigmoid Colon	8140/3: Adenocarcinoma, NOS	C18.7-Sigmoid colon	Moderately differentiated; Grade II	Blank(s)	IIA	Blank(s)	Blank(s)	T3	Blank(s)	Blank(s)	N0	30	4 or more regional lymph nodes removed	Blank(s)	Blank(s)	40	400	3	0	3	6	0	999	No radiation and/or cancer-directed surgery	None	Alive or dead of other cause	Alive or dead due to cancer	119	Alive	One primary only	January	Yes
4451669	2004	Male	63	Asian or Pacific Islander	Married (including common law)	Sigmoid Colon	8140/3: Adenocarcinoma, NOS	C18.7-Sigmoid colon	Poorly differentiated; Grade III	Blank(s)	IIB	Blank(s)	Blank(s)	T4	Blank(s)	Blank(s)	N0	30	4 or more regional lymph nodes removed	Blank(s)	Blank(s)	45	550	3	0	3	4	0	998	No radiation and/or cancer-directed surgery	None	Dead (attributable to this cancer dx)	Alive or dead due to cancer	46	Colon excluding Rectum	One primary only	July	Yes
4451899	2004	Male	60	White	Married (including common law)	Transverse Colon	8140/3: Adenocarcinoma, NOS	C18.4-Transverse colon	Moderately differentiated; Grade II	Blank(s)	IIIB	Blank(s)	Blank(s)	T3	Blank(s)	Blank(s)	N1	30	4 or more regional lymph nodes removed	Blank(s)	Blank(s)	85	450	3	300	3	8	1	999	No radiation and/or cancer-directed surgery	None	Alive or dead of other cause	Dead (attributable to causes other than this cancer dx)	39	Diabetes Mellitus	One primary only	April	Yes
4452047	2004	Male	67	Asian or Pacific Islander	Married (including common law)	Ascending Colon	8140/3: Adenocarcinoma, NOS	C18.2-Ascending colon	Moderately differentiated; Grade II	Blank(s)	IIA	Blank(s)	Blank(s)	T3	Blank(s)	Blank(s)	N0	40	4 or more regional lymph nodes removed	Blank(s)	Blank(s)	45	400	3	0	3	6	0	998	No radiation and/or cancer-directed surgery	None	Alive or dead of other cause	Dead (attributable to causes other than this cancer dx)	39	Aortic Aneurysm and Dissection	One primary only	May	No/Unknown
4452067	2004	Male	58	White	Married (including common law)	Cecum	8140/3: Adenocarcinoma, NOS	C18.0-Cecum	Moderately differentiated; Grade II	Blank(s)	IIB	Blank(s)	Blank(s)	T4	Blank(s)	Blank(s)	N0	40	4 or more regional lymph nodes removed	Blank(s)	Blank(s)	999	500	3	0	3	11	0	999	No radiation and/or cancer-directed surgery	None	Alive or dead of other cause	Alive or dead due to cancer	118	Alive	One primary only	February	Yes
4452161	2004	Female	80	Asian or Pacific Islander	Married (including common law)	Ascending Colon	8140/3: Adenocarcinoma, NOS	C18.2-Ascending colon	Moderately differentiated; Grade II	Blank(s)	I	Blank(s)	Blank(s)	T2	Blank(s)	Blank(s)	N0	40	4 or more regional lymph nodes removed	Blank(s)	Blank(s)	40	200	3	0	3	11	0	998	No radiation and/or cancer-directed surgery	None	Alive or dead of other cause	Dead (attributable to causes other than this cancer dx)	20	Chronic Obstructive Pulmonary Disease and Allied Cond	One primary only	May	No/Unknown
4452318	2004	Female	54	White	Married (including common law)	Rectum	8140/3: Adenocarcinoma, NOS	C20.9-Rectum, NOS	Moderately differentiated; Grade II	Blank(s)	IIIC	Blank(s)	Blank(s)	T3	Blank(s)	Blank(s)	N2	30	4 or more regional lymph nodes removed	Blank(s)	Blank(s)	25	450	5	300	5	8	5	999	Radiation prior to surgery	Beam radiation	Dead (attributable to this cancer dx)	Alive or dead due to cancer	20	Colon excluding Rectum	One primary only	February	Yes
4452342	2004	Male	70	White	Married (including common law)	Rectum	8140/3: Adenocarcinoma, NOS	C20.9-Rectum, NOS	Poorly differentiated; Grade III	Blank(s)	IIIB	Blank(s)	Blank(s)	T3	Blank(s)	Blank(s)	N1	30	4 or more regional lymph nodes removed	Blank(s)	Blank(s)	50	450	6	300	6	9	2	10	Radiation prior to surgery	Beam radiation	Dead (attributable to this cancer dx)	Alive or dead due to cancer	88	Colon excluding Rectum	One primary only	February	No/Unknown
4452363	2004	Male	57	Black	Married (including common law)	Ascending Colon	8140/3: Adenocarcinoma, NOS	C18.2-Ascending colon	Moderately differentiated; Grade II	Blank(s)	I	Blank(s)	Blank(s)	T2	Blank(s)	Blank(s)	N0	40	4 or more regional lymph nodes removed	Blank(s)	Blank(s)	25	200	3	0	3	24	0	20	No radiation and/or cancer-directed surgery	None	Alive or dead of other cause	Alive or dead due to cancer	119	Alive	One primary only	January	No/Unknown
4452364	2004	Female	75	Asian or Pacific Islander	Married (including common law)	Sigmoid Colon	8140/3: Adenocarcinoma, NOS	C18.7-Sigmoid colon	Moderately differentiated; Grade II	Blank(s)	IIB	Blank(s)	Blank(s)	T4	Blank(s)	Blank(s)	N0	30	1 to 3 regional lymph nodes removed	Blank(s)	Blank(s)	999	500	3	0	3	3	0	998	No radiation and/or cancer-directed surgery	None	Alive or dead of other cause	Dead (attributable to causes other than this cancer dx)	14	Other Cause of Death	One primary only	February	No/Unknown
4452381	2004	Female	67	Asian or Pacific Islander	Married (including common law)	Cecum	8140/3: Adenocarcinoma, NOS	C18.0-Cecum	Moderately differentiated; Grade II	Blank(s)	IIIC	Blank(s)	Blank(s)	T4	Blank(s)	Blank(s)	N2	40	4 or more regional lymph nodes removed	Blank(s)	Blank(s)	40	570	3	200	3	44	20	999	No radiation and/or cancer-directed surgery	None	Dead (attributable to this cancer dx)	Alive or dead due to cancer	72	Colon excluding Rectum	One primary only	March	Yes
4452392	2004	Male	71	Asian or Pacific Islander	Married (including common law)	Rectum	8140/3: Adenocarcinoma, NOS	C20.9-Rectum, NOS	Poorly differentiated; Grade III	Blank(s)	IIIB	Blank(s)	Blank(s)	T3	Blank(s)	Blank(s)	N1	30	1 to 3 regional lymph nodes removed	Blank(s)	Blank(s)	40	450	5	100	5	2	0	20	Radiation prior to surgery	Beam radiation	Alive or dead of other cause	Alive or dead due to cancer	118	Alive	One primary only	February	Yes
4452553	2004	Female	44	Asian or Pacific Islander	Divorced	Sigmoid Colon	8140/3: Adenocarcinoma, NOS	C18.7-Sigmoid colon	Moderately differentiated; Grade II	Blank(s)	IIA	Blank(s)	Blank(s)	T3	Blank(s)	Blank(s)	N0	30	4 or more regional lymph nodes removed	Blank(s)	Blank(s)	30	450	3	0	3	7	0	998	No radiation and/or cancer-directed surgery	None	Alive or dead of other cause	Alive or dead due to cancer	119	Alive	One primary only	January	Yes
4452564	2004	Male	34	White	Married (including common law)	Rectum	8140/3: Adenocarcinoma, NOS	C20.9-Rectum, NOS	Moderately differentiated; Grade II	Blank(s)	I	Blank(s)	Blank(s)	T1	Blank(s)	Blank(s)	N0	30	4 or more regional lymph nodes removed	Blank(s)	Blank(s)	34	300	5	0	6	6	0	20	Radiation prior to surgery	Beam radiation	Alive or dead of other cause	Alive or dead due to cancer	117	Alive	One primary only	March	Yes
4452737	2004	Female	57	Black	Single (never married)	Sigmoid Colon	8140/3: Adenocarcinoma, NOS	C18.7-Sigmoid colon	Moderately differentiated; Grade II	Blank(s)	IIB	Blank(s)	Blank(s)	T4	Blank(s)	Blank(s)	N0	30	4 or more regional lymph nodes removed	Blank(s)	Blank(s)	77	600	3	0	3	6	0	10	Radiation after surgery	Beam radiation	Dead (attributable to this cancer dx)	Alive or dead due to cancer	25	Colon excluding Rectum	One primary only	January	Yes
4452802	2004	Male	73	Black	Married (including common law)	Hepatic Flexure	8480/3: Mucinous adenocarcinoma	C18.3-Hepatic flexure of colon	Moderately differentiated; Grade II	Blank(s)	IIB	Blank(s)	Blank(s)	T4	Blank(s)	Blank(s)	N0	40	4 or more regional lymph nodes removed	Blank(s)	Blank(s)	40	500	3	0	3	18	0	999	No radiation and/or cancer-directed surgery	None	Dead (attributable to this cancer dx)	Alive or dead due to cancer	90	Colon excluding Rectum	One primary only	January	No/Unknown
4462117	2004	Female	61	White	Married (including common law)	Sigmoid Colon	8140/3: Adenocarcinoma, NOS	C18.7-Sigmoid colon	Moderately differentiated; Grade II	Blank(s)	IIIB	Blank(s)	Blank(s)	T3	Blank(s)	Blank(s)	N1	30	4 or more regional lymph nodes removed	Blank(s)	Blank(s)	50	450	3	100	3	16	1	999	No radiation and/or cancer-directed surgery	None	Alive or dead of other cause	Alive or dead due to cancer	119	Alive	One primary only	January	Yes
4465791	2004	Female	79	Asian or Pacific Islander	Widowed	Sigmoid Colon	8140/3: Adenocarcinoma, NOS	C18.7-Sigmoid colon	Well differentiated; Grade I	Blank(s)	IIA	Blank(s)	Blank(s)	T3	Blank(s)	Blank(s)	N0	30	1 to 3 regional lymph nodes removed	Blank(s)	Blank(s)	30	400	3	0	3	3	0	10	No radiation and/or cancer-directed surgery	None	Alive or dead of other cause	Alive or dead due to cancer	41	Alive	One primary only	March	No/Unknown
4465903	2004	Male	58	White	Married (including common law)	Sigmoid Colon	8140/3: Adenocarcinoma, NOS	C18.7-Sigmoid colon	Moderately differentiated; Grade II	Blank(s)	IIA	Blank(s)	Blank(s)	T3	Blank(s)	Blank(s)	N0	40	1 to 3 regional lymph nodes removed	Blank(s)	Blank(s)	20	450	3	0	3	7	0	999	No radiation and/or cancer-directed surgery	None	Alive or dead of other cause	Alive or dead due to cancer	117	Alive	One primary only	March	No/Unknown
4466084	2004	Male	59	White	Married (including common law)	Ascending Colon	8140/3: Adenocarcinoma, NOS	C18.2-Ascending colon	Moderately differentiated; Grade II	Blank(s)	IIIC	Blank(s)	Blank(s)	T3	Blank(s)	Blank(s)	N2	40	4 or more regional lymph nodes removed	Blank(s)	Blank(s)	30	450	3	300	3	18	4	998	No radiation and/or cancer-directed surgery	None	Dead (attributable to this cancer dx)	Alive or dead due to cancer	40	Colon excluding Rectum	One primary only	January	Yes
4466091	2004	Female	70	White	Widowed	Rectosigmoid Junction	8140/3: Adenocarcinoma, NOS	C19.9-Rectosigmoid junction	Moderately differentiated; Grade II	Blank(s)	IIIB	Blank(s)	Blank(s)	T3	Blank(s)	Blank(s)	N1	30	4 or more regional lymph nodes removed	Blank(s)	Blank(s)	999	400	3	300	3	19	1	20	No radiation and/or cancer-directed surgery	None	Alive or dead of other cause	Alive or dead due to cancer	118	Alive	One primary only	February	No/Unknown
4466558	2004	Male	75	White	Married (including common law)	Rectosigmoid Junction	8140/3: Adenocarcinoma, NOS	C19.9-Rectosigmoid junction	Moderately differentiated; Grade II	Blank(s)	IIIB	Blank(s)	Blank(s)	T3	Blank(s)	Blank(s)	N1	30	4 or more regional lymph nodes removed	Blank(s)	Blank(s)	25	400	3	300	3	9	3	20	No radiation and/or cancer-directed surgery	None	Dead (attributable to this cancer dx)	Alive or dead due to cancer	50	Rectum and Rectosigmoid Junction	One primary only	March	Yes
4466585	2004	Male	52	White	Married (including common law)	Sigmoid Colon	8140/3: Adenocarcinoma, NOS	C18.7-Sigmoid colon	Moderately differentiated; Grade II	Blank(s)	IIA	Blank(s)	Blank(s)	T3	Blank(s)	Blank(s)	N0	40	4 or more regional lymph nodes removed	Blank(s)	Blank(s)	65	400	3	0	3	33	0	20	No radiation and/or cancer-directed surgery	None	Alive or dead of other cause	Alive or dead due to cancer	117	Alive	One primary only	March	No/Unknown
4466586	2004	Male	72	White	Married (including common law)	Descending Colon	8140/3: Adenocarcinoma, NOS	C18.6-Descending colon	Moderately differentiated; Grade II	Blank(s)	IIA	Blank(s)	Blank(s)	T3	Blank(s)	Blank(s)	N0	40	4 or more regional lymph nodes removed	Blank(s)	Blank(s)	43	450	3	0	3	37	0	10	No radiation and/or cancer-directed surgery	None	Dead (attributable to this cancer dx)	Alive or dead due to cancer	26	Other Cause of Death	One primary only	June	No/Unknown
4466950	2004	Male	49	White	Married (including common law)	Rectum	8140/3: Adenocarcinoma, NOS	C20.9-Rectum, NOS	Moderately differentiated; Grade II	Blank(s)	IIIB	Blank(s)	Blank(s)	T3	Blank(s)	Blank(s)	N1	30	Sentinel node biopsy and lym nd removed same/unstated time	Blank(s)	Blank(s)	28	450	5	100	5	3	0	998	Radiation prior to surgery	Beam radiation	Alive or dead of other cause	Alive or dead due to cancer	102	Alive	One primary only	April	Yes
4467002	2004	Female	76	White	Married (including common law)	Sigmoid Colon	8140/3: Adenocarcinoma, NOS	C18.7-Sigmoid colon	Well differentiated; Grade I	Blank(s)	IIA	Blank(s)	Blank(s)	T3	Blank(s)	Blank(s)	N0	80	4 or more regional lymph nodes removed	Blank(s)	Blank(s)	50	400	3	0	3	17	0	10	No radiation and/or cancer-directed surgery	None	Dead (attributable to this cancer dx)	Alive or dead due to cancer	45	Colon excluding Rectum	One primary only	March	No/Unknown
4467013	2004	Male	71	Asian or Pacific Islander	Married (including common law)	Rectum	8140/3: Adenocarcinoma, NOS	C20.9-Rectum, NOS	Poorly differentiated; Grade III	Blank(s)	IIA	Blank(s)	Blank(s)	T3	Blank(s)	Blank(s)	N0	50	4 or more regional lymph nodes removed	Blank(s)	Blank(s)	45	400	3	0	3	7	0	20	Radiation after surgery	Beam radiation	Alive or dead of other cause	Dead (attributable to causes other than this cancer dx)	38	State DC not available or state DC available but no COD	One primary only	February	No/Unknown
4467106	2004	Female	76	White	Married (including common law)	Cecum	8140/3: Adenocarcinoma, NOS	C18.0-Cecum	Moderately differentiated; Grade II	Blank(s)	IIA	Blank(s)	Blank(s)	T3	Blank(s)	Blank(s)	N0	40	4 or more regional lymph nodes removed	Blank(s)	Blank(s)	50	400	3	0	3	10	0	998	No radiation and/or cancer-directed surgery	None	Alive or dead of other cause	Alive or dead due to cancer	118	Alive	One primary only	February	No/Unknown
4467138	2004	Male	68	Asian or Pacific Islander	Widowed	Descending Colon	8140/3: Adenocarcinoma, NOS	C18.6-Descending colon	Moderately differentiated; Grade II	Blank(s)	IIB	Blank(s)	Blank(s)	T4	Blank(s)	Blank(s)	N0	41	4 or more regional lymph nodes removed	Blank(s)	Blank(s)	54	650	3	0	3	9	0	998	No radiation and/or cancer-directed surgery	None	Alive or dead of other cause	Dead (attributable to causes other than this cancer dx)	50	Cerebrovascular Diseases	One primary only	April	Yes
4467194	2004	Male	51	Asian or Pacific Islander	Single (never married)	Sigmoid Colon	8140/3: Adenocarcinoma, NOS	C18.7-Sigmoid colon	Moderately differentiated; Grade II	Blank(s)	IIA	Blank(s)	Blank(s)	T3	Blank(s)	Blank(s)	N0	30	4 or more regional lymph nodes removed	Blank(s)	Blank(s)	40	450	3	0	3	18	0	20	No radiation and/or cancer-directed surgery	None	Alive or dead of other cause	Alive or dead due to cancer	116	Alive	One primary only	April	Yes
4467275	2004	Female	77	Asian or Pacific Islander	Widowed	Rectosigmoid Junction	8140/3: Adenocarcinoma, NOS	C19.9-Rectosigmoid junction	Moderately differentiated; Grade II	Blank(s)	IIA	Blank(s)	Blank(s)	T3	Blank(s)	Blank(s)	N0	30	4 or more regional lymph nodes removed	Blank(s)	Blank(s)	40	400	3	0	3	8	0	20	Radiation after surgery	Beam radiation	Alive or dead of other cause	Alive or dead due to cancer	117	Alive	One primary only	March	No/Unknown
4467312	2004	Female	56	Asian or Pacific Islander	Divorced	Rectum	8140/3: Adenocarcinoma, NOS	C20.9-Rectum, NOS	Moderately differentiated; Grade II	Blank(s)	IIIA	Blank(s)	Blank(s)	T1	Blank(s)	Blank(s)	N1	27	4 or more regional lymph nodes removed	Blank(s)	Blank(s)	50	300	3	100	3	10	0	999	Radiation before and after surgery	Beam radiation	Alive or dead of other cause	Alive or dead due to cancer	115	Alive	One primary only	May	Yes
4467333	2004	Female	75	White	Married (including common law)	Cecum	8480/3: Mucinous adenocarcinoma	C18.0-Cecum	Moderately differentiated; Grade II	Blank(s)	IIIC	Blank(s)	Blank(s)	T3	Blank(s)	Blank(s)	N2	40	4 or more regional lymph nodes removed	Blank(s)	Blank(s)	41	400	3	300	3	17	5	10	No radiation and/or cancer-directed surgery	None	Dead (attributable to this cancer dx)	Alive or dead due to cancer	17	Colon excluding Rectum	One primary only	February	No/Unknown
4467533	2004	Female	53	White	Divorced	Cecum	8480/3: Mucinous adenocarcinoma	C18.0-Cecum	Poorly differentiated; Grade III	Blank(s)	IIIB	Blank(s)	Blank(s)	T3	Blank(s)	Blank(s)	N1	40	4 or more regional lymph nodes removed	Blank(s)	Blank(s)	60	450	3	100	3	8	3	10	No radiation and/or cancer-directed surgery	None	Alive or dead of other cause	Alive or dead due to cancer	114	Alive	One primary only	June	Yes
4467536	2004	Female	73	White	Widowed	Cecum	8140/3: Adenocarcinoma, NOS	C18.0-Cecum	Poorly differentiated; Grade III	Blank(s)	IIA	Blank(s)	Blank(s)	T3	Blank(s)	Blank(s)	N0	40	4 or more regional lymph nodes removed	Blank(s)	Blank(s)	100	400	3	0	3	12	0	10	No radiation and/or cancer-directed surgery	None	Alive or dead of other cause	Alive or dead due to cancer	115	Alive	One primary only	May	Yes
4467556	2004	Male	55	Asian or Pacific Islander	Married (including common law)	Rectum	8480/3: Mucinous adenocarcinoma	C20.9-Rectum, NOS	Poorly differentiated; Grade III	Blank(s)	IIIC	Blank(s)	Blank(s)	T3	Blank(s)	Blank(s)	N2	50	4 or more regional lymph nodes removed	Blank(s)	Blank(s)	39	450	3	200	3	10	10	20	Radiation prior to surgery	Radiation, NOS method or source not specified	Dead (attributable to this cancer dx)	Alive or dead due to cancer	8	Rectum and Rectosigmoid Junction	One primary only	April	Yes
4467570	2004	Female	73	White	Married (including common law)	Sigmoid Colon	8490/3: Signet ring cell carcinoma	C18.7-Sigmoid colon	Poorly differentiated; Grade III	Blank(s)	IIIC	Blank(s)	Blank(s)	T3	Blank(s)	Blank(s)	N2	30	4 or more regional lymph nodes removed	Blank(s)	Blank(s)	60	450	3	300	3	12	7	20	No radiation and/or cancer-directed surgery	None	Dead (attributable to this cancer dx)	Alive or dead due to cancer	28	Colon excluding Rectum	One primary only	March	No/Unknown
4467582	2004	Male	80	White	Single (never married)	Descending Colon	8140/3: Adenocarcinoma, NOS	C18.6-Descending colon	Moderately differentiated; Grade II	Blank(s)	I	Blank(s)	Blank(s)	T1	Blank(s)	Blank(s)	N0	40	1 to 3 regional lymph nodes removed	Blank(s)	Blank(s)	18	160	3	0	3	2	0	20	No radiation and/or cancer-directed surgery	None	Alive or dead of other cause	Dead (attributable to causes other than this cancer dx)	86	Diseases of Heart	One primary only	June	No/Unknown
4467583	2004	Female	73	Asian or Pacific Islander	Widowed	Descending Colon	8140/3: Adenocarcinoma, NOS	C18.6-Descending colon	Moderately differentiated; Grade II	Blank(s)	IIA	Blank(s)	Blank(s)	T3	Blank(s)	Blank(s)	N0	40	4 or more regional lymph nodes removed	Blank(s)	Blank(s)	21	450	3	0	3	6	0	20	No radiation and/or cancer-directed surgery	None	Alive or dead of other cause	Alive or dead due to cancer	115	Alive	One primary only	May	No/Unknown
4467588	2004	Female	50	Asian or Pacific Islander	Married (including common law)	Sigmoid Colon	8140/3: Adenocarcinoma, NOS	C18.7-Sigmoid colon	Poorly differentiated; Grade III	Blank(s)	IIIB	Blank(s)	Blank(s)	T3	Blank(s)	Blank(s)	N1	30	4 or more regional lymph nodes removed	Blank(s)	Blank(s)	30	450	3	100	3	8	1	10	No radiation and/or cancer-directed surgery	None	Alive or dead of other cause	Alive or dead due to cancer	117	Alive	One primary only	March	Yes
4467594	2004	Male	78	White	Married (including common law)	Sigmoid Colon	8140/3: Adenocarcinoma, NOS	C18.7-Sigmoid colon	Moderately differentiated; Grade II	Blank(s)	IIIB	Blank(s)	Blank(s)	T3	Blank(s)	Blank(s)	N1	30	4 or more regional lymph nodes removed	Blank(s)	Blank(s)	8	450	3	100	3	4	3	999	No radiation and/or cancer-directed surgery	None	Dead (attributable to this cancer dx)	Alive or dead due to cancer	35	Colon excluding Rectum	One primary only	March	Yes
4467595	2004	Male	52	Asian or Pacific Islander	Married (including common law)	Sigmoid Colon	8140/3: Adenocarcinoma, NOS	C18.7-Sigmoid colon	Moderately differentiated; Grade II	Blank(s)	IIIB	Blank(s)	Blank(s)	T3	Blank(s)	Blank(s)	N1	40	4 or more regional lymph nodes removed	Blank(s)	Blank(s)	40	400	3	200	3	6	1	10	No radiation and/or cancer-directed surgery	None	Alive or dead of other cause	Alive or dead due to cancer	114	Alive	One primary only	June	Yes
4467615	2004	Female	71	White	Married (including common law)	Hepatic Flexure	8140/3: Adenocarcinoma, NOS	C18.3-Hepatic flexure of colon	Poorly differentiated; Grade III	Blank(s)	I	Blank(s)	Blank(s)	T1	Blank(s)	Blank(s)	N0	30	4 or more regional lymph nodes removed	Blank(s)	Blank(s)	25	160	3	0	3	23	0	20	No radiation and/or cancer-directed surgery	None	Alive or dead of other cause	Alive or dead due to cancer	116	Alive	One primary only	April	No/Unknown
4467620	2004	Male	69	White	Divorced	Rectosigmoid Junction	8490/3: Signet ring cell carcinoma	C19.9-Rectosigmoid junction	Poorly differentiated; Grade III	Blank(s)	IIIC	Blank(s)	Blank(s)	T4	Blank(s)	Blank(s)	N2	30	4 or more regional lymph nodes removed	Blank(s)	Blank(s)	75	500	3	100	3	7	6	10	No radiation and/or cancer-directed surgery	None	Alive or dead of other cause	Dead (attributable to causes other than this cancer dx)	39	Cerebrovascular Diseases	One primary only	March	No/Unknown
4467628	2004	Male	62	White	Married (including common law)	Rectum	8140/3: Adenocarcinoma, NOS	C20.9-Rectum, NOS	Moderately differentiated; Grade II	Blank(s)	IIB	Blank(s)	Blank(s)	T4	Blank(s)	Blank(s)	N0	70	1 to 3 regional lymph nodes removed	Blank(s)	Blank(s)	120	610	5	0	5	2	0	10	Radiation prior to surgery	Beam radiation	Alive or dead of other cause	Alive or dead due to cancer	114	Alive	One primary only	June	Yes
4467744	2004	Male	43	Asian or Pacific Islander	Separated	Descending Colon	8140/3: Adenocarcinoma, NOS	C18.6-Descending colon	Moderately differentiated; Grade II	Blank(s)	IIIB	Blank(s)	Blank(s)	T3	Blank(s)	Blank(s)	N1	40	4 or more regional lymph nodes removed	Blank(s)	Blank(s)	40	450	3	200	3	15	3	20	No radiation and/or cancer-directed surgery	None	Dead (attributable to this cancer dx)	Alive or dead due to cancer	63	Colon excluding Rectum	One primary only	March	Yes
4467817	2004	Male	66	White	Married (including common law)	Hepatic Flexure	8140/3: Adenocarcinoma, NOS	C18.3-Hepatic flexure of colon	Moderately differentiated; Grade II	Blank(s)	IIIB	Blank(s)	Blank(s)	T3	Blank(s)	Blank(s)	N1	40	4 or more regional lymph nodes removed	Blank(s)	Blank(s)	80	450	3	300	3	13	2	10	No radiation and/or cancer-directed surgery	None	Dead (attributable to this cancer dx)	Alive or dead due to cancer	43	Colon excluding Rectum	One primary only	May	Yes
4467831	2004	Male	62	White	Married (including common law)	Cecum	8140/3: Adenocarcinoma, NOS	C18.0-Cecum	Moderately differentiated; Grade II	Blank(s)	I	Blank(s)	Blank(s)	T1	Blank(s)	Blank(s)	N0	40	4 or more regional lymph nodes removed	Blank(s)	Blank(s)	42	160	3	0	3	9	0	999	No radiation and/or cancer-directed surgery	None	Alive or dead of other cause	Alive or dead due to cancer	113	Alive	One primary only	July	No/Unknown
4467881	2004	Female	55	Asian or Pacific Islander	Divorced	Rectum	8140/3: Adenocarcinoma, NOS	C20.9-Rectum, NOS	Moderately differentiated; Grade II	Blank(s)	IIA	Blank(s)	Blank(s)	T3	Blank(s)	Blank(s)	N0	30	4 or more regional lymph nodes removed	Blank(s)	Blank(s)	30	400	5	0	6	4	0	998	Radiation prior to surgery	Beam radiation	Alive or dead of other cause	Alive or dead due to cancer	117	Alive	One primary only	March	Yes
4467883	2004	Male	70	White	Married (including common law)	Cecum	8140/3: Adenocarcinoma, NOS	C18.0-Cecum	Poorly differentiated; Grade III	Blank(s)	IIIC	Blank(s)	Blank(s)	T3	Blank(s)	Blank(s)	N2	40	4 or more regional lymph nodes removed	Blank(s)	Blank(s)	32	450	3	300	3	8	5	20	No radiation and/or cancer-directed surgery	None	Alive or dead of other cause	Dead (attributable to causes other than this cancer dx)	49	Other Cause of Death	One primary only	April	Yes
4467885	2004	Male	76	White	Married (including common law)	Transverse Colon	8140/3: Adenocarcinoma, NOS	C18.4-Transverse colon	Moderately differentiated; Grade II	Blank(s)	IIA	Blank(s)	Blank(s)	T3	Blank(s)	Blank(s)	N0	40	4 or more regional lymph nodes removed	Blank(s)	Blank(s)	60	450	3	0	3	22	0	20	No radiation and/or cancer-directed surgery	None	Dead (attributable to this cancer dx)	Alive or dead due to cancer	1	Colon excluding Rectum	One primary only	June	No/Unknown
4467886	2004	Female	47	White	Divorced	Rectum	8140/3: Adenocarcinoma, NOS	C20.9-Rectum, NOS	Moderately differentiated; Grade II	Blank(s)	IIIC	Blank(s)	Blank(s)	T3	Blank(s)	Blank(s)	N2	30	4 or more regional lymph nodes removed	Blank(s)	Blank(s)	40	450	3	100	3	12	5	10	Radiation after surgery	Beam radiation	Dead (attributable to this cancer dx)	Alive or dead due to cancer	69	Rectum and Rectosigmoid Junction	One primary only	June	Yes
4468112	2004	Male	65	White	Married (including common law)	Cecum	8140/3: Adenocarcinoma, NOS	C18.0-Cecum	Moderately differentiated; Grade II	Blank(s)	IIIB	Blank(s)	Blank(s)	T3	Blank(s)	Blank(s)	N1	40	4 or more regional lymph nodes removed	Blank(s)	Blank(s)	30	450	3	300	3	9	3	20	No radiation and/or cancer-directed surgery	None	Dead (attributable to this cancer dx)	Alive or dead due to cancer	29	Colon excluding Rectum	One primary only	May	Yes
4468177	2004	Female	60	White	Married (including common law)	Descending Colon	8140/3: Adenocarcinoma, NOS	C18.6-Descending colon	Poorly differentiated; Grade III	Blank(s)	IIIB	Blank(s)	Blank(s)	T3	Blank(s)	Blank(s)	N1	40	4 or more regional lymph nodes removed	Blank(s)	Blank(s)	71	400	3	300	3	11	1	20	No radiation and/or cancer-directed surgery	None	Alive or dead of other cause	Alive or dead due to cancer	114	Alive	One primary only	June	Yes
4468178	2004	Male	71	White	Married (including common law)	Transverse Colon	8140/3: Adenocarcinoma, NOS	C18.4-Transverse colon	Moderately differentiated; Grade II	Blank(s)	IIIC	Blank(s)	Blank(s)	T3	Blank(s)	Blank(s)	N2	30	4 or more regional lymph nodes removed	Blank(s)	Blank(s)	80	450	3	300	3	9	6	10	No radiation and/or cancer-directed surgery	None	Dead (attributable to this cancer dx)	Alive or dead due to cancer	15	Colon excluding Rectum	One primary only	June	No/Unknown
4468241	2004	Male	78	White	Married (including common law)	Cecum	8480/3: Mucinous adenocarcinoma	C18.0-Cecum	Moderately differentiated; Grade II	Blank(s)	IIA	Blank(s)	Blank(s)	T3	Blank(s)	Blank(s)	N0	40	4 or more regional lymph nodes removed	Blank(s)	Blank(s)	55	460	3	0	3	19	0	20	No radiation and/or cancer-directed surgery	None	Alive or dead of other cause	Dead (attributable to causes other than this cancer dx)	101	Other Diseases of Arteries, Arterioles, Capillaries	One primary only	April	Yes
4468322	2004	Female	78	Black	Widowed	Ascending Colon	8140/3: Adenocarcinoma, NOS	C18.2-Ascending colon	Poorly differentiated; Grade III	Blank(s)	IIIC	Blank(s)	Blank(s)	T3	Blank(s)	Blank(s)	N2	40	4 or more regional lymph nodes removed	Blank(s)	Blank(s)	45	450	3	100	3	23	6	999	No radiation and/or cancer-directed surgery	None	Alive or dead of other cause	Alive or dead due to cancer	117	Alive	One primary only	March	Yes
4468334	2004	Male	73	Black	Single (never married)	Descending Colon	8140/3: Adenocarcinoma, NOS	C18.6-Descending colon	Moderately differentiated; Grade II	Blank(s)	IIIC	Blank(s)	Blank(s)	T3	Blank(s)	Blank(s)	N2	30	4 or more regional lymph nodes removed	Blank(s)	Blank(s)	48	400	3	300	3	11	4	998	No radiation and/or cancer-directed surgery	None	Alive or dead of other cause	Dead (attributable to causes other than this cancer dx)	6	Diseases of Heart	One primary only	April	No/Unknown
4468891	2004	Female	59	White	Married (including common law)	Sigmoid Colon	8140/3: Adenocarcinoma, NOS	C18.7-Sigmoid colon	Poorly differentiated; Grade III	Blank(s)	IIIC	Blank(s)	Blank(s)	T3	Blank(s)	Blank(s)	N2	40	4 or more regional lymph nodes removed	Blank(s)	Blank(s)	27	450	3	100	3	16	6	10	No radiation and/or cancer-directed surgery	None	Alive or dead of other cause	Alive or dead due to cancer	117	Alive	One primary only	March	Yes
4468898	2004	Male	59	Black	Single (never married)	Cecum	8140/3: Adenocarcinoma, NOS	C18.0-Cecum	Moderately differentiated; Grade II	Blank(s)	IIA	Blank(s)	Blank(s)	T3	Blank(s)	Blank(s)	N0	40	4 or more regional lymph nodes removed	Blank(s)	Blank(s)	45	450	3	0	3	13	0	998	No radiation and/or cancer-directed surgery	None	Alive or dead of other cause	Dead (attributable to causes other than this cancer dx)	48	Diabetes Mellitus	One primary only	February	No/Unknown
4468929	2004	Female	54	White	Married (including common law)	Ascending Colon	8140/3: Adenocarcinoma, NOS	C18.2-Ascending colon	Moderately differentiated; Grade II	Blank(s)	IIB	Blank(s)	Blank(s)	T4	Blank(s)	Blank(s)	N0	30	4 or more regional lymph nodes removed	Blank(s)	Blank(s)	50	500	3	0	3	16	0	999	No radiation and/or cancer-directed surgery	None	Alive or dead of other cause	Alive or dead due to cancer	117	Alive	One primary only	March	Yes
4468975	2004	Female	63	White	Married (including common law)	Hepatic Flexure	8140/3: Adenocarcinoma, NOS	C18.3-Hepatic flexure of colon	Moderately differentiated; Grade II	Blank(s)	IIIB	Blank(s)	Blank(s)	T3	Blank(s)	Blank(s)	N1	40	4 or more regional lymph nodes removed	Blank(s)	Blank(s)	60	400	3	300	3	29	2	10	No radiation and/or cancer-directed surgery	None	Alive or dead of other cause	Alive or dead due to cancer	114	Alive	One primary only	June	Yes
4469051	2004	Male	32	White	Married (including common law)	Sigmoid Colon	8140/3: Adenocarcinoma, NOS	C18.7-Sigmoid colon	Poorly differentiated; Grade III	Blank(s)	IIIC	Blank(s)	Blank(s)	T3	Blank(s)	Blank(s)	N2	30	4 or more regional lymph nodes removed	Blank(s)	Blank(s)	45	450	3	300	3	31	30	999	No radiation and/or cancer-directed surgery	None	Dead (attributable to this cancer dx)	Alive or dead due to cancer	39	In situ, benign or unknown behavior neoplasm	One primary only	April	Yes
4469168	2004	Female	20	Black	Single (never married)	Sigmoid Colon	8140/3: Adenocarcinoma, NOS	C18.7-Sigmoid colon	Moderately differentiated; Grade II	Blank(s)	IIIC	Blank(s)	Blank(s)	T3	Blank(s)	Blank(s)	N2	30	4 or more regional lymph nodes removed	Blank(s)	Blank(s)	50	400	3	300	3	23	8	999	No radiation and/or cancer-directed surgery	None	Dead (attributable to this cancer dx)	Alive or dead due to cancer	77	Colon excluding Rectum	One primary only	August	Yes
4471384	2004	Female	74	White	Married (including common law)	Cecum	8140/3: Adenocarcinoma, NOS	C18.0-Cecum	Moderately differentiated; Grade II	Blank(s)	IIIB	Blank(s)	Blank(s)	T3	Blank(s)	Blank(s)	N1	40	4 or more regional lymph nodes removed	Blank(s)	Blank(s)	50	400	3	100	3	16	2	999	No radiation and/or cancer-directed surgery	None	Alive or dead of other cause	Alive or dead due to cancer	111	Alive	One primary only	September	No/Unknown
4471410	2004	Male	55	White	Married (including common law)	Sigmoid Colon	8140/3: Adenocarcinoma, NOS	C18.7-Sigmoid colon	Moderately differentiated; Grade II	Blank(s)	IIA	Blank(s)	Blank(s)	T3	Blank(s)	Blank(s)	N0	30	4 or more regional lymph nodes removed	Blank(s)	Blank(s)	60	450	3	0	3	15	0	999	No radiation and/or cancer-directed surgery	None	Alive or dead of other cause	Alive or dead due to cancer	111	Alive	One primary only	September	Yes
4471438	2004	Male	52	White	Married (including common law)	Rectum	8481/3: Mucin-producing adenocarcinoma	C20.9-Rectum, NOS	Poorly differentiated; Grade III	Blank(s)	IIIB	Blank(s)	Blank(s)	T3	Blank(s)	Blank(s)	N1	50	1 to 3 regional lymph nodes removed	Blank(s)	Blank(s)	60	400	6	100	6	3	0	20	Radiation prior to surgery	Beam radiation	Dead (attributable to this cancer dx)	Alive or dead due to cancer	23	Rectum and Rectosigmoid Junction	One primary only	September	Yes
4481563	2004	Female	74	Black	Widowed	Descending Colon	8140/3: Adenocarcinoma, NOS	C18.6-Descending colon	Moderately differentiated; Grade II	Blank(s)	I	Blank(s)	Blank(s)	T1	Blank(s)	Blank(s)	N0	30	4 or more regional lymph nodes removed	Blank(s)	Blank(s)	12	160	3	0	3	17	0	998	No radiation and/or cancer-directed surgery	None	Alive or dead of other cause	Alive or dead due to cancer	115	Alive	One primary only	May	No/Unknown
4483853	2004	Male	64	White	Married (including common law)	Sigmoid Colon	8140/3: Adenocarcinoma, NOS	C18.7-Sigmoid colon	Moderately differentiated; Grade II	Blank(s)	IIIC	Blank(s)	Blank(s)	T3	Blank(s)	Blank(s)	N2	30	4 or more regional lymph nodes removed	Blank(s)	Blank(s)	30	400	3	300	3	7	4	20	No radiation and/or cancer-directed surgery	None	Alive or dead of other cause	Alive or dead due to cancer	115	Alive	One primary only	May	Yes
4484465	2004	Female	54	Black	Married (including common law)	Ascending Colon	8480/3: Mucinous adenocarcinoma	C18.2-Ascending colon	Moderately differentiated; Grade II	Blank(s)	I	Blank(s)	Blank(s)	T2	Blank(s)	Blank(s)	N0	40	4 or more regional lymph nodes removed	Blank(s)	Blank(s)	15	200	3	0	3	15	0	10	No radiation and/or cancer-directed surgery	None	Alive or dead of other cause	Alive or dead due to cancer	115	Alive	One primary only	February	No/Unknown
4485934	2004	Male	64	White	Single (never married)	Rectum	8140/3: Adenocarcinoma, NOS	C20.9-Rectum, NOS	Poorly differentiated; Grade III	Blank(s)	IIIB	Blank(s)	Blank(s)	T3	Blank(s)	Blank(s)	N1	30	4 or more regional lymph nodes removed	Blank(s)	Blank(s)	60	450	3	300	3	8	2	998	No radiation and/or cancer-directed surgery	None	Alive or dead of other cause	Dead (attributable to causes other than this cancer dx)	22	Hypertension without Heart Disease	One primary only	August	No/Unknown
4487964	2004	Male	80	White	Married (including common law)	Cecum	8140/3: Adenocarcinoma, NOS	C18.0-Cecum	Poorly differentiated; Grade III	Blank(s)	IIA	Blank(s)	Blank(s)	T3	Blank(s)	Blank(s)	N0	40	1 to 3 regional lymph nodes removed	Blank(s)	Blank(s)	32	400	3	0	3	4	0	997	No radiation and/or cancer-directed surgery	None	Alive or dead of other cause	Dead (attributable to causes other than this cancer dx)	103	Cerebrovascular Diseases	One primary only	October	No/Unknown
4488043	2004	Female	78	Asian or Pacific Islander	Widowed	Ascending Colon	8140/3: Adenocarcinoma, NOS	C18.2-Ascending colon	Moderately differentiated; Grade II	Blank(s)	IIA	Blank(s)	Blank(s)	T3	Blank(s)	Blank(s)	N0	40	4 or more regional lymph nodes removed	Blank(s)	Blank(s)	52	400	3	0	3	14	0	20	No radiation and/or cancer-directed surgery	None	Alive or dead of other cause	Alive or dead due to cancer	114	Alive	One primary only	June	No/Unknown
4488045	2004	Female	75	Asian or Pacific Islander	Married (including common law)	Ascending Colon	8140/3: Adenocarcinoma, NOS	C18.2-Ascending colon	Moderately differentiated; Grade II	Blank(s)	IIA	Blank(s)	Blank(s)	T3	Blank(s)	Blank(s)	N0	40	4 or more regional lymph nodes removed	Blank(s)	Blank(s)	60	400	3	0	3	20	0	10	No radiation and/or cancer-directed surgery	None	Alive or dead of other cause	Alive or dead due to cancer	114	Alive	One primary only	June	No/Unknown
4488055	2004	Female	79	White	Widowed	Ascending Colon	8140/3: Adenocarcinoma, NOS	C18.2-Ascending colon	Poorly differentiated; Grade III	Blank(s)	IIIC	Blank(s)	Blank(s)	T4	Blank(s)	Blank(s)	N2	40	4 or more regional lymph nodes removed	Blank(s)	Blank(s)	45	550	3	200	3	10	8	20	No radiation and/or cancer-directed surgery	None	Dead (attributable to this cancer dx)	Alive or dead due to cancer	50	Colon excluding Rectum	One primary only	May	No/Unknown
4488058	2004	Female	61	Asian or Pacific Islander	Single (never married)	Ascending Colon	8480/3: Mucinous adenocarcinoma	C18.2-Ascending colon	Moderately differentiated; Grade II	Blank(s)	IIIB	Blank(s)	Blank(s)	T3	Blank(s)	Blank(s)	N1	40	4 or more regional lymph nodes removed	Blank(s)	Blank(s)	68	450	3	100	3	19	2	20	No radiation and/or cancer-directed surgery	None	Alive or dead of other cause	Alive or dead due to cancer	113	Alive	One primary only	July	Yes
4488071	2004	Male	77	White	Single (never married)	Hepatic Flexure	8140/3: Adenocarcinoma, NOS	C18.3-Hepatic flexure of colon	Moderately differentiated; Grade II	Blank(s)	IIA	Blank(s)	Blank(s)	T3	Blank(s)	Blank(s)	N0	40	4 or more regional lymph nodes removed	Blank(s)	Blank(s)	35	400	3	0	3	16	0	20	No radiation and/or cancer-directed surgery	None	Alive or dead of other cause	Dead (attributable to causes other than this cancer dx)	18	Pneumonia and Influenza	One primary only	July	No/Unknown
4488075	2004	Male	73	White	Single (never married)	Transverse Colon	8480/3: Mucinous adenocarcinoma	C18.4-Transverse colon	Moderately differentiated; Grade II	Blank(s)	IIA	Blank(s)	Blank(s)	T3	Blank(s)	Blank(s)	N0	30	4 or more regional lymph nodes removed	Blank(s)	Blank(s)	45	400	3	0	3	9	0	20	No radiation and/or cancer-directed surgery	None	Alive or dead of other cause	Alive or dead due to cancer	114	Alive	One primary only	June	No/Unknown
4488078	2004	Female	55	White	Divorced	Transverse Colon	8140/3: Adenocarcinoma, NOS	C18.4-Transverse colon	Moderately differentiated; Grade II	Blank(s)	IIA	Blank(s)	Blank(s)	T3	Blank(s)	Blank(s)	N0	30	4 or more regional lymph nodes removed	Blank(s)	Blank(s)	60	400	3	0	3	26	0	20	No radiation and/or cancer-directed surgery	None	Alive or dead of other cause	Alive or dead due to cancer	115	Alive	One primary only	May	Yes
4488080	2004	Male	48	Asian or Pacific Islander	Married (including common law)	Transverse Colon	8140/3: Adenocarcinoma, NOS	C18.4-Transverse colon	Poorly differentiated; Grade III	Blank(s)	IIIC	Blank(s)	Blank(s)	T3	Blank(s)	Blank(s)	N2	30	4 or more regional lymph nodes removed	Blank(s)	Blank(s)	40	450	3	100	3	10	5	10	No radiation and/or cancer-directed surgery	None	Dead (attributable to this cancer dx)	Alive or dead due to cancer	1	Colon excluding Rectum	One primary only	July	No/Unknown
4488085	2004	Female	64	Asian or Pacific Islander	Married (including common law)	Sigmoid Colon	8140/3: Adenocarcinoma, NOS	C18.7-Sigmoid colon	Moderately differentiated; Grade II	Blank(s)	IIA	Blank(s)	Blank(s)	T3	Blank(s)	Blank(s)	N0	30	4 or more regional lymph nodes removed	Blank(s)	Blank(s)	20	400	3	0	3	7	0	20	No radiation and/or cancer-directed surgery	None	Alive or dead of other cause	Alive or dead due to cancer	117	Alive	One primary only	March	No/Unknown
4488256	2004	Female	55	White	Married (including common law)	Cecum	8140/3: Adenocarcinoma, NOS	C18.0-Cecum	Poorly differentiated; Grade III	Blank(s)	IIIC	Blank(s)	Blank(s)	T4	Blank(s)	Blank(s)	N2	40	4 or more regional lymph nodes removed	Blank(s)	Blank(s)	999	600	3	100	3	9	5	999	No radiation and/or cancer-directed surgery	None	Dead (attributable to this cancer dx)	Alive or dead due to cancer	12	Colon excluding Rectum	One primary only	February	Yes
4488422	2004	Male	73	White	Married (including common law)	Cecum	8140/3: Adenocarcinoma, NOS	C18.0-Cecum	Poorly differentiated; Grade III	Blank(s)	IIA	Blank(s)	Blank(s)	T3	Blank(s)	Blank(s)	N0	40	4 or more regional lymph nodes removed	Blank(s)	Blank(s)	38	458	3	0	3	7	0	20	No radiation and/or cancer-directed surgery	None	Dead (attributable to this cancer dx)	Alive or dead due to cancer	90	Colon excluding Rectum	One primary only	August	No/Unknown
4488425	2004	Female	80	White	Widowed	Cecum	8140/3: Adenocarcinoma, NOS	C18.0-Cecum	Poorly differentiated; Grade III	Blank(s)	IIIB	Blank(s)	Blank(s)	T3	Blank(s)	Blank(s)	N1	40	4 or more regional lymph nodes removed	Blank(s)	Blank(s)	50	400	3	100	3	18	2	999	No radiation and/or cancer-directed surgery	None	Dead (attributable to this cancer dx)	Alive or dead due to cancer	53	Colon excluding Rectum	One primary only	January	Yes
4488431	2004	Male	60	White	Married (including common law)	Sigmoid Colon	8140/3: Adenocarcinoma, NOS	C18.7-Sigmoid colon	Moderately differentiated; Grade II	Blank(s)	I	Blank(s)	Blank(s)	T1	Blank(s)	Blank(s)	N0	30	4 or more regional lymph nodes removed	Blank(s)	Blank(s)	20	160	3	0	3	8	0	999	No radiation and/or cancer-directed surgery	None	Alive or dead of other cause	Alive or dead due to cancer	119	Alive	One primary only	January	No/Unknown
4488435	2004	Female	75	White	Married (including common law)	Cecum	8140/3: Adenocarcinoma, NOS	C18.0-Cecum	Well differentiated; Grade I	Blank(s)	I	Blank(s)	Blank(s)	T2	Blank(s)	Blank(s)	N0	40	4 or more regional lymph nodes removed	Blank(s)	Blank(s)	35	200	3	0	3	8	0	10	No radiation and/or cancer-directed surgery	None	Alive or dead of other cause	Alive or dead due to cancer	113	Alive	One primary only	July	No/Unknown
4488438	2004	Male	66	Asian or Pacific Islander	Married (including common law)	Ascending Colon	8140/3: Adenocarcinoma, NOS	C18.2-Ascending colon	Moderately differentiated; Grade II	Blank(s)	I	Blank(s)	Blank(s)	T2	Blank(s)	Blank(s)	N0	40	4 or more regional lymph nodes removed	Blank(s)	Blank(s)	25	200	3	0	3	12	0	10	No radiation and/or cancer-directed surgery	None	Alive or dead of other cause	Alive or dead due to cancer	114	Alive	One primary only	July	No/Unknown
4488441	2004	Male	77	White	Single (never married)	Hepatic Flexure	8140/3: Adenocarcinoma, NOS	C18.3-Hepatic flexure of colon	Moderately differentiated; Grade II	Blank(s)	IIA	Blank(s)	Blank(s)	T3	Blank(s)	Blank(s)	N0	40	1 to 3 regional lymph nodes removed	Blank(s)	Blank(s)	50	450	3	0	3	3	0	10	No radiation and/or cancer-directed surgery	None	Dead (attributable to this cancer dx)	Alive or dead due to cancer	73	Colon excluding Rectum	One primary only	August	No/Unknown
4488451	2004	Female	74	White	Married (including common law)	Transverse Colon	8140/3: Adenocarcinoma, NOS	C18.4-Transverse colon	Poorly differentiated; Grade III	Blank(s)	IIA	Blank(s)	Blank(s)	T3	Blank(s)	Blank(s)	N0	30	4 or more regional lymph nodes removed	Blank(s)	Blank(s)	40	400	3	0	3	8	0	10	No radiation and/or cancer-directed surgery	None	Alive or dead of other cause	Alive or dead due to cancer	113	Alive	One primary only	July	No/Unknown
4488465	2004	Female	68	White	Widowed	Sigmoid Colon	8140/3: Adenocarcinoma, NOS	C18.7-Sigmoid colon	Well differentiated; Grade I	Blank(s)	IIA	Blank(s)	Blank(s)	T3	Blank(s)	Blank(s)	N0	30	1 to 3 regional lymph nodes removed	Blank(s)	Blank(s)	44	450	3	0	3	3	0	20	No radiation and/or cancer-directed surgery	None	Alive or dead of other cause	Alive or dead due to cancer	113	Alive	One primary only	July	No/Unknown
4488477	2004	Female	57	Asian or Pacific Islander	Married (including common law)	Sigmoid Colon	8140/3: Adenocarcinoma, NOS	C18.7-Sigmoid colon	Poorly differentiated; Grade III	Blank(s)	IIIA	Blank(s)	Blank(s)	T2	Blank(s)	Blank(s)	N1	30	4 or more regional lymph nodes removed	Blank(s)	Blank(s)	30	200	3	100	3	7	2	997	No radiation and/or cancer-directed surgery	None	Dead (attributable to this cancer dx)	Alive or dead due to cancer	57	Other Cause of Death	One primary only	August	Yes
4488484	2004	Male	47	Asian or Pacific Islander	Married (including common law)	Sigmoid Colon	8140/3: Adenocarcinoma, NOS	C18.7-Sigmoid colon	Moderately differentiated; Grade II	Blank(s)	IIA	Blank(s)	Blank(s)	T3	Blank(s)	Blank(s)	N0	30	4 or more regional lymph nodes removed	Blank(s)	Blank(s)	38	450	3	0	3	7	0	10	No radiation and/or cancer-directed surgery	None	Alive or dead of other cause	Alive or dead due to cancer	111	Alive	One primary only	September	No/Unknown
4488518	2004	Female	52	Asian or Pacific Islander	Married (including common law)	Sigmoid Colon	8140/3: Adenocarcinoma, NOS	C18.7-Sigmoid colon	Well differentiated; Grade I	Blank(s)	IIA	Blank(s)	Blank(s)	T3	Blank(s)	Blank(s)	N0	50	4 or more regional lymph nodes removed	Blank(s)	Blank(s)	45	400	3	0	3	11	0	10	No radiation and/or cancer-directed surgery	None	Alive or dead of other cause	Alive or dead due to cancer	116	Alive	One primary only	April	No/Unknown
4488519	2004	Female	78	White	Married (including common law)	Sigmoid Colon	8140/3: Adenocarcinoma, NOS	C18.7-Sigmoid colon	Moderately differentiated; Grade II	Blank(s)	IIIA	Blank(s)	Blank(s)	T2	Blank(s)	Blank(s)	N1	30	4 or more regional lymph nodes removed	Blank(s)	Blank(s)	22	200	3	300	3	6	1	20	No radiation and/or cancer-directed surgery	None	Alive or dead of other cause	Alive or dead due to cancer	92	Alive	One primary only	March	No/Unknown
4488536	2004	Female	71	Asian or Pacific Islander	Widowed	Cecum	8140/3: Adenocarcinoma, NOS	C18.0-Cecum	Moderately differentiated; Grade II	Blank(s)	IIIC	Blank(s)	Blank(s)	T3	Blank(s)	Blank(s)	N2	40	4 or more regional lymph nodes removed	Blank(s)	Blank(s)	50	450	3	100	3	14	5	999	No radiation and/or cancer-directed surgery	None	Alive or dead of other cause	Alive or dead due to cancer	26	Alive	One primary only	January	Yes
4488564	2004	Male	78	White	Married (including common law)	Cecum	8480/3: Mucinous adenocarcinoma	C18.0-Cecum	Moderately differentiated; Grade II	Blank(s)	IIA	Blank(s)	Blank(s)	T3	Blank(s)	Blank(s)	N0	40	4 or more regional lymph nodes removed	Blank(s)	Blank(s)	60	450	3	0	3	7	0	20	No radiation and/or cancer-directed surgery	None	Alive or dead of other cause	Dead (attributable to causes other than this cancer dx)	30	Diseases of Heart	One primary only	September	No/Unknown
4488567	2004	Female	74	White	Married (including common law)	Cecum	8140/3: Adenocarcinoma, NOS	C18.0-Cecum	Well differentiated; Grade I	Blank(s)	IIA	Blank(s)	Blank(s)	T3	Blank(s)	Blank(s)	N0	40	4 or more regional lymph nodes removed	Blank(s)	Blank(s)	40	450	3	0	3	17	0	20	No radiation and/or cancer-directed surgery	None	Alive or dead of other cause	Alive or dead due to cancer	111	Alive	One primary only	September	Yes
4488571	2004	Female	63	Asian or Pacific Islander	Married (including common law)	Sigmoid Colon	8140/3: Adenocarcinoma, NOS	C18.7-Sigmoid colon	Poorly differentiated; Grade III	Blank(s)	IIIB	Blank(s)	Blank(s)	T3	Blank(s)	Blank(s)	N1	32	4 or more regional lymph nodes removed	Blank(s)	Blank(s)	52	460	3	300	3	14	2	20	No radiation and/or cancer-directed surgery	None	Alive or dead of other cause	Alive or dead due to cancer	111	Alive	One primary only	September	Yes
4488602	2004	Male	73	White	Single (never married)	Rectum	8140/3: Adenocarcinoma, NOS	C20.9-Rectum, NOS	Moderately differentiated; Grade II	Blank(s)	IIIB	Blank(s)	Blank(s)	T3	Blank(s)	Blank(s)	N1	0	None	Blank(s)	Blank(s)	50	450	1	300	0	98	0	20	No radiation and/or cancer-directed surgery	Beam radiation	Alive or dead of other cause	Alive or dead due to cancer	114	Alive	One primary only	June	Yes
4488628	2004	Female	33	Asian or Pacific Islander	Married (including common law)	Rectum	8140/3: Adenocarcinoma, NOS	C20.9-Rectum, NOS	Moderately differentiated; Grade II	Blank(s)	IIIB	Blank(s)	Blank(s)	T3	Blank(s)	Blank(s)	N1	50	4 or more regional lymph nodes removed	Blank(s)	Blank(s)	40	400	5	100	5	5	0	10	Radiation prior to surgery	Beam radiation	Alive or dead of other cause	Alive or dead due to cancer	112	Alive	One primary only	August	Yes
4488707	2004	Male	65	White	Married (including common law)	Sigmoid Colon	8140/3: Adenocarcinoma, NOS	C18.7-Sigmoid colon	Moderately differentiated; Grade II	Blank(s)	I	Blank(s)	Blank(s)	T1	Blank(s)	Blank(s)	N0	40	1 to 3 regional lymph nodes removed	Blank(s)	Blank(s)	25	160	3	0	3	2	0	998	No radiation and/or cancer-directed surgery	None	Alive or dead of other cause	Alive or dead due to cancer	117	Alive	One primary only	March	No/Unknown
4488716	2004	Female	60	Asian or Pacific Islander	Married (including common law)	Descending Colon	8480/3: Mucinous adenocarcinoma	C18.6-Descending colon	Moderately differentiated; Grade II	Blank(s)	IIB	Blank(s)	Blank(s)	T4	Blank(s)	Blank(s)	N0	40	4 or more regional lymph nodes removed	Blank(s)	Blank(s)	50	500	3	0	3	10	0	998	No radiation and/or cancer-directed surgery	None	Alive or dead of other cause	Alive or dead due to cancer	117	Alive	One primary only	March	No/Unknown
4488755	2004	Male	80	Asian or Pacific Islander	Single (never married)	Sigmoid Colon	8140/3: Adenocarcinoma, NOS	C18.7-Sigmoid colon	Moderately differentiated; Grade II	Blank(s)	IIIB	Blank(s)	Blank(s)	T4	Blank(s)	Blank(s)	N1	30	4 or more regional lymph nodes removed	Blank(s)	Blank(s)	20	600	3	300	3	4	0	20	No radiation and/or cancer-directed surgery	None	Alive or dead of other cause	Alive or dead due to cancer	111	Alive	One primary only	September	No/Unknown
4488870	2004	Male	75	Black	Divorced	Sigmoid Colon	8140/3: Adenocarcinoma, NOS	C18.7-Sigmoid colon	Moderately differentiated; Grade II	Blank(s)	IIA	Blank(s)	Blank(s)	T3	Blank(s)	Blank(s)	N0	30	1 to 3 regional lymph nodes removed	Blank(s)	Blank(s)	33	400	3	0	3	1	0	998	No radiation and/or cancer-directed surgery	None	Dead (attributable to this cancer dx)	Alive or dead due to cancer	13	Lung and Bronchus	One primary only	April	Yes
4488884	2004	Female	63	White	Married (including common law)	Cecum	8140/3: Adenocarcinoma, NOS	C18.0-Cecum	Moderately differentiated; Grade II	Blank(s)	I	Blank(s)	Blank(s)	T1	Blank(s)	Blank(s)	N0	30	1 to 3 regional lymph nodes removed	Blank(s)	Blank(s)	20	160	3	0	3	1	0	999	No radiation and/or cancer-directed surgery	None	Alive or dead of other cause	Dead (attributable to causes other than this cancer dx)	99	Diseases of Heart	One primary only	May	No/Unknown
4488892	2004	Female	57	White	Married (including common law)	Sigmoid Colon	8140/3: Adenocarcinoma, NOS	C18.7-Sigmoid colon	Moderately differentiated; Grade II	Blank(s)	IIB	Blank(s)	Blank(s)	T4	Blank(s)	Blank(s)	N0	30	4 or more regional lymph nodes removed	Blank(s)	Blank(s)	50	650	1	0	3	8	0	999	Radiation after surgery	Beam radiation	Alive or dead of other cause	Alive or dead due to cancer	116	Alive	One primary only	April	Yes
4488898	2004	Female	54	White	Single (never married)	Sigmoid Colon	8480/3: Mucinous adenocarcinoma	C18.7-Sigmoid colon	Well differentiated; Grade I	Blank(s)	I	Blank(s)	Blank(s)	T2	Blank(s)	Blank(s)	N0	30	4 or more regional lymph nodes removed	Blank(s)	Blank(s)	15	200	3	0	3	4	0	20	No radiation and/or cancer-directed surgery	None	Alive or dead of other cause	Alive or dead due to cancer	114	Alive	One primary only	June	No/Unknown
4488906	2004	Male	70	Black	Single (never married)	Transverse Colon	8140/3: Adenocarcinoma, NOS	C18.4-Transverse colon	Moderately differentiated; Grade II	Blank(s)	IIIB	Blank(s)	Blank(s)	T3	Blank(s)	Blank(s)	N1	27	4 or more regional lymph nodes removed	Blank(s)	Blank(s)	90	450	3	200	3	12	1	10	No radiation and/or cancer-directed surgery	None	Alive or dead of other cause	Dead (attributable to causes other than this cancer dx)	1	Diseases of Heart	One primary only	September	No/Unknown
4488921	2004	Male	60	Black	Married (including common law)	Splenic Flexure	8140/3: Adenocarcinoma, NOS	C18.5-Splenic flexure of colon	Moderately differentiated; Grade II	Blank(s)	IIA	Blank(s)	Blank(s)	T3	Blank(s)	Blank(s)	N0	40	4 or more regional lymph nodes removed	Blank(s)	Blank(s)	20	400	3	0	3	7	0	999	No radiation and/or cancer-directed surgery	None	Alive or dead of other cause	Alive or dead due to cancer	112	Alive	One primary only	August	No/Unknown
4488984	2004	Female	72	White	Married (including common law)	Cecum	8140/3: Adenocarcinoma, NOS	C18.0-Cecum	Moderately differentiated; Grade II	Blank(s)	I	Blank(s)	Blank(s)	T2	Blank(s)	Blank(s)	N0	40	4 or more regional lymph nodes removed	Blank(s)	Blank(s)	32	200	3	0	3	7	0	20	No radiation and/or cancer-directed surgery	None	Alive or dead of other cause	Dead (attributable to causes other than this cancer dx)	84	Other Cause of Death	One primary only	August	No/Unknown
4488988	2004	Female	59	White	Divorced	Sigmoid Colon	8140/3: Adenocarcinoma, NOS	C18.7-Sigmoid colon	Moderately differentiated; Grade II	Blank(s)	IIIC	Blank(s)	Blank(s)	T2	Blank(s)	Blank(s)	N2	30	4 or more regional lymph nodes removed	Blank(s)	Blank(s)	44	200	3	300	3	22	4	10	No radiation and/or cancer-directed surgery	None	Alive or dead of other cause	Alive or dead due to cancer	114	Alive	One primary only	June	No/Unknown
4489023	2004	Female	65	Asian or Pacific Islander	Married (including common law)	Ascending Colon	8140/3: Adenocarcinoma, NOS	C18.2-Ascending colon	Moderately differentiated; Grade II	Blank(s)	IIIB	Blank(s)	Blank(s)	T3	Blank(s)	Blank(s)	N1	40	4 or more regional lymph nodes removed	Blank(s)	Blank(s)	30	450	3	100	3	12	2	999	No radiation and/or cancer-directed surgery	None	Alive or dead of other cause	Alive or dead due to cancer	112	Alive	One primary only	August	Yes
4489113	2004	Male	57	White	Married (including common law)	Transverse Colon	8140/3: Adenocarcinoma, NOS	C18.4-Transverse colon	Moderately differentiated; Grade II	Blank(s)	IIIB	Blank(s)	Blank(s)	T3	Blank(s)	Blank(s)	N1	30	4 or more regional lymph nodes removed	Blank(s)	Blank(s)	35	400	3	300	3	18	3	999	No radiation and/or cancer-directed surgery	None	Alive or dead of other cause	Alive or dead due to cancer	113	Alive	One primary only	July	Yes
4489186	2004	Male	41	White	Married (including common law)	Rectum	8140/3: Adenocarcinoma, NOS	C20.9-Rectum, NOS	Moderately differentiated; Grade II	Blank(s)	I	Blank(s)	Blank(s)	T2	Blank(s)	Blank(s)	N0	30	4 or more regional lymph nodes removed	Blank(s)	Blank(s)	40	200	3	0	3	5	0	20	Radiation after surgery	Beam radiation	Alive or dead of other cause	Alive or dead due to cancer	110	Alive	One primary only	October	Yes
4489228	2004	Female	64	White	Divorced	Rectosigmoid Junction	8140/3: Adenocarcinoma, NOS	C19.9-Rectosigmoid junction	Moderately differentiated; Grade II	Blank(s)	I	Blank(s)	Blank(s)	T1	Blank(s)	Blank(s)	N0	30	4 or more regional lymph nodes removed	Blank(s)	Blank(s)	15	160	3	0	3	8	0	999	No radiation and/or cancer-directed surgery	None	Alive or dead of other cause	Alive or dead due to cancer	117	Alive	One primary only	March	No/Unknown
4489395	2004	Male	28	White	Single (never married)	Rectosigmoid Junction	8140/3: Adenocarcinoma, NOS	C19.9-Rectosigmoid junction	Poorly differentiated; Grade III	Blank(s)	IIIB	Blank(s)	Blank(s)	T3	Blank(s)	Blank(s)	N1	30	4 or more regional lymph nodes removed	Blank(s)	Blank(s)	45	400	3	300	3	97	97	10	Radiation after surgery	Beam radiation	Alive or dead of other cause	Alive or dead due to cancer	116	Alive	One primary only	April	Yes
4489417	2004	Male	60	White	Divorced	Rectum	8140/3: Adenocarcinoma, NOS	C20.9-Rectum, NOS	Moderately differentiated; Grade II	Blank(s)	IIB	Blank(s)	Blank(s)	T4	Blank(s)	Blank(s)	N0	70	4 or more regional lymph nodes removed	Blank(s)	Blank(s)	999	610	0	0	0	0	98	20	Radiation prior to surgery	Beam radiation	Alive or dead of other cause	Dead (attributable to causes other than this cancer dx)	13	Chronic Liver Disease and Cirrhosis	One primary only	May	Yes
4489420	2004	Male	57	White	Married (including common law)	Rectum	8140/3: Adenocarcinoma, NOS	C20.9-Rectum, NOS	Moderately differentiated; Grade II	Blank(s)	IIIB	Blank(s)	Blank(s)	T3	Blank(s)	Blank(s)	N1	30	Number of regional lymph nodes removed unknown	Blank(s)	Blank(s)	30	400	5	200	5	5	0	20	Radiation prior to surgery	Beam radiation	Alive or dead of other cause	Dead (attributable to causes other than this cancer dx)	76	Diseases of Heart	One primary only	June	Yes
4489432	2004	Male	57	White	Divorced	Rectum	8140/3: Adenocarcinoma, NOS	C20.9-Rectum, NOS	Moderately differentiated; Grade II	Blank(s)	IIIB	Blank(s)	Blank(s)	T3	Blank(s)	Blank(s)	N1	50	4 or more regional lymph nodes removed	Blank(s)	Blank(s)	40	455	6	110	6	10	1	10	Radiation before and after surgery	Beam radiation	Dead (attributable to this cancer dx)	Alive or dead due to cancer	91	Colon excluding Rectum	One primary only	July	Yes
4489448	2004	Female	71	White	Married (including common law)	Rectosigmoid Junction	8140/3: Adenocarcinoma, NOS	C19.9-Rectosigmoid junction	Moderately differentiated; Grade II	Blank(s)	IIIB	Blank(s)	Blank(s)	T3	Blank(s)	Blank(s)	N1	30	4 or more regional lymph nodes removed	Blank(s)	Blank(s)	17	400	3	300	3	12	1	999	No radiation and/or cancer-directed surgery	None	Alive or dead of other cause	Alive or dead due to cancer	116	Alive	One primary only	April	Yes
4489476	2004	Male	60	White	Married (including common law)	Rectum	8140/3: Adenocarcinoma, NOS	C20.9-Rectum, NOS	Moderately differentiated; Grade II	Blank(s)	IIA	Blank(s)	Blank(s)	T3	Blank(s)	Blank(s)	N0	30	4 or more regional lymph nodes removed	Blank(s)	Blank(s)	999	450	5	0	6	6	0	998	Radiation after surgery	Beam radiation	Alive or dead of other cause	Alive or dead due to cancer	112	Alive	One primary only	August	Yes
4489504	2004	Male	41	White	Single (never married)	Cecum	8140/3: Adenocarcinoma, NOS	C18.0-Cecum	Moderately differentiated; Grade II	Blank(s)	IIA	Blank(s)	Blank(s)	T3	Blank(s)	Blank(s)	N0	40	4 or more regional lymph nodes removed	Blank(s)	Blank(s)	55	450	3	0	3	47	0	20	No radiation and/or cancer-directed surgery	None	Alive or dead of other cause	Alive or dead due to cancer	116	Alive	One primary only	April	Yes
4489518	2004	Female	70	White	Married (including common law)	Ascending Colon	8140/3: Adenocarcinoma, NOS	C18.2-Ascending colon	Moderately differentiated; Grade II	Blank(s)	IIIB	Blank(s)	Blank(s)	T3	Blank(s)	Blank(s)	N1	40	4 or more regional lymph nodes removed	Blank(s)	Blank(s)	15	450	3	100	3	9	2	999	No radiation and/or cancer-directed surgery	None	Dead (attributable to this cancer dx)	Alive or dead due to cancer	4	Colon excluding Rectum	One primary only	August	Yes
4489520	2004	Female	50	White	Married (including common law)	Ascending Colon	8480/3: Mucinous adenocarcinoma	C18.2-Ascending colon	Moderately differentiated; Grade II	Blank(s)	IIIB	Blank(s)	Blank(s)	T3	Blank(s)	Blank(s)	N1	40	4 or more regional lymph nodes removed	Blank(s)	Blank(s)	10	400	3	100	3	11	1	999	No radiation and/or cancer-directed surgery	None	Dead (attributable to this cancer dx)	Alive or dead due to cancer	80	Colon excluding Rectum	One primary only	July	Yes
4489561	2004	Male	55	White	Married (including common law)	Rectum	8140/3: Adenocarcinoma, NOS	C20.9-Rectum, NOS	Moderately differentiated; Grade II	Blank(s)	I	Blank(s)	Blank(s)	T2	Blank(s)	Blank(s)	N0	50	1 to 3 regional lymph nodes removed	Blank(s)	Blank(s)	9	200	3	0	3	3	0	10	Radiation prior to surgery	Radiation, NOS method or source not specified	Dead (attributable to this cancer dx)	Alive or dead due to cancer	41	Rectum and Rectosigmoid Junction	One primary only	June	Yes
4489586	2004	Male	36	Black	Married (including common law)	Rectosigmoid Junction	8140/3: Adenocarcinoma, NOS	C19.9-Rectosigmoid junction	Moderately differentiated; Grade II	Blank(s)	IIA	Blank(s)	Blank(s)	T3	Blank(s)	Blank(s)	N0	30	4 or more regional lymph nodes removed	Blank(s)	Blank(s)	80	450	3	0	3	6	0	999	Radiation prior to surgery	Beam radiation	Alive or dead of other cause	Alive or dead due to cancer	115	Alive	One primary only	May	Yes
4489602	2004	Female	77	White	Married (including common law)	Cecum	8140/3: Adenocarcinoma, NOS	C18.0-Cecum	Moderately differentiated; Grade II	Blank(s)	IIA	Blank(s)	Blank(s)	T3	Blank(s)	Blank(s)	N0	40	4 or more regional lymph nodes removed	Blank(s)	Blank(s)	37	400	3	0	3	13	0	20	No radiation and/or cancer-directed surgery	None	Alive or dead of other cause	Alive or dead due to cancer	114	Alive	One primary only	June	No/Unknown
4489606	2004	Female	65	Black	Married (including common law)	Cecum	8481/3: Mucin-producing adenocarcinoma	C18.0-Cecum	Moderately differentiated; Grade II	Blank(s)	IIIC	Blank(s)	Blank(s)	T4	Blank(s)	Blank(s)	N2	30	4 or more regional lymph nodes removed	Blank(s)	Blank(s)	80	600	3	200	3	14	5	10	No radiation and/or cancer-directed surgery	None	Dead (attributable to this cancer dx)	Alive or dead due to cancer	61	Colon excluding Rectum	One primary only	May	Yes
4489609	2004	Male	76	Asian or Pacific Islander	Single (never married)	Cecum	8490/3: Signet ring cell carcinoma	C18.0-Cecum	Poorly differentiated; Grade III	Blank(s)	IIIC	Blank(s)	Blank(s)	T4	Blank(s)	Blank(s)	N2	40	4 or more regional lymph nodes removed	Blank(s)	Blank(s)	130	600	3	300	3	5	5	999	No radiation and/or cancer-directed surgery	None	Dead (attributable to this cancer dx)	Alive or dead due to cancer	1	Colon excluding Rectum	One primary only	January	No/Unknown
4489611	2004	Female	71	White	Married (including common law)	Appendix	8480/3: Mucinous adenocarcinoma	C18.1-Appendix	Well differentiated; Grade I	Blank(s)	IIA	Blank(s)	Blank(s)	T3	Blank(s)	Blank(s)	N0	30	4 or more regional lymph nodes removed	Blank(s)	Blank(s)	999	450	3	0	3	14	0	10	No radiation and/or cancer-directed surgery	None	Dead (attributable to this cancer dx)	Alive or dead due to cancer	9	Colon excluding Rectum	One primary only	August	No/Unknown
4489620	2004	Male	74	White	Married (including common law)	Ascending Colon	8140/3: Adenocarcinoma, NOS	C18.2-Ascending colon	Moderately differentiated; Grade II	Blank(s)	I	Blank(s)	Blank(s)	T2	Blank(s)	Blank(s)	N0	41	4 or more regional lymph nodes removed	Blank(s)	Blank(s)	20	200	3	0	3	11	0	20	No radiation and/or cancer-directed surgery	None	Alive or dead of other cause	Alive or dead due to cancer	115	Alive	One primary only	May	No/Unknown
4489634	2004	Male	56	White	Married (including common law)	Sigmoid Colon	8140/3: Adenocarcinoma, NOS	C18.7-Sigmoid colon	Poorly differentiated; Grade III	Blank(s)	IIIC	Blank(s)	Blank(s)	T3	Blank(s)	Blank(s)	N2	30	4 or more regional lymph nodes removed	Blank(s)	Blank(s)	999	450	3	300	3	9	7	20	No radiation and/or cancer-directed surgery	None	Dead (attributable to this cancer dx)	Alive or dead due to cancer	39	Colon excluding Rectum	One primary only	May	Yes
4489644	2004	Female	43	Black	Married (including common law)	Sigmoid Colon	8140/3: Adenocarcinoma, NOS	C18.7-Sigmoid colon	Moderately differentiated; Grade II	Blank(s)	IIA	Blank(s)	Blank(s)	T3	Blank(s)	Blank(s)	N0	30	4 or more regional lymph nodes removed	Blank(s)	Blank(s)	999	400	3	0	3	6	0	999	No radiation and/or cancer-directed surgery	None	Alive or dead of other cause	Alive or dead due to cancer	116	Alive	One primary only	April	Yes
4489678	2004	Female	45	White	Married (including common law)	Rectum	8140/3: Adenocarcinoma, NOS	C20.9-Rectum, NOS	Moderately differentiated; Grade II	Blank(s)	I	Blank(s)	Blank(s)	T2	Blank(s)	Blank(s)	N0	30	1 to 3 regional lymph nodes removed	Blank(s)	Blank(s)	50	200	5	0	5	3	0	20	Radiation prior to surgery	Beam radiation	Alive or dead of other cause	Alive or dead due to cancer	114	Alive	One primary only	June	Yes
4489690	2004	Male	71	White	Married (including common law)	Sigmoid Colon	8140/3: Adenocarcinoma, NOS	C18.7-Sigmoid colon	Moderately differentiated; Grade II	Blank(s)	IIIC	Blank(s)	Blank(s)	T2	Blank(s)	Blank(s)	N2	30	4 or more regional lymph nodes removed	Blank(s)	Blank(s)	40	200	3	300	3	13	8	999	No radiation and/or cancer-directed surgery	None	Dead (attributable to this cancer dx)	Alive or dead due to cancer	77	Colon excluding Rectum	One primary only	August	Yes
4489692	2004	Male	61	White	Married (including common law)	Rectum	8481/3: Mucin-producing adenocarcinoma	C20.9-Rectum, NOS	Poorly differentiated; Grade III	Blank(s)	IIIC	Blank(s)	Blank(s)	T3	Blank(s)	Blank(s)	N2	50	4 or more regional lymph nodes removed	Blank(s)	Blank(s)	60	450	6	100	6	12	8	999	Radiation prior to surgery	Beam radiation	Dead (attributable to this cancer dx)	Alive or dead due to cancer	24	Rectum and Rectosigmoid Junction	One primary only	August	Yes
4489695	2004	Male	58	White	Married (including common law)	Rectosigmoid Junction	8140/3: Adenocarcinoma, NOS	C19.9-Rectosigmoid junction	Moderately differentiated; Grade II	Blank(s)	I	Blank(s)	Blank(s)	T2	Blank(s)	Blank(s)	N0	30	4 or more regional lymph nodes removed	Blank(s)	Blank(s)	999	200	3	0	3	9	0	999	No radiation and/or cancer-directed surgery	None	Alive or dead of other cause	Alive or dead due to cancer	112	Alive	One primary only	August	No/Unknown
4489877	2004	Male	49	Asian or Pacific Islander	Married (including common law)	Rectum	8140/3: Adenocarcinoma, NOS	C20.9-Rectum, NOS	Moderately differentiated; Grade II	Blank(s)	IIIB	Blank(s)	Blank(s)	T3	Blank(s)	Blank(s)	N1	50	4 or more regional lymph nodes removed	Blank(s)	Blank(s)	60	400	0	100	3	7	1	998	Radiation prior to surgery	Beam radiation	Alive or dead of other cause	Alive or dead due to cancer	115	Alive	One primary only	May	Yes
4489905	2004	Female	57	White	Married (including common law)	Sigmoid Colon	8140/3: Adenocarcinoma, NOS	C18.7-Sigmoid colon	Moderately differentiated; Grade II	Blank(s)	I	Blank(s)	Blank(s)	T2	Blank(s)	Blank(s)	N0	30	4 or more regional lymph nodes removed	Blank(s)	Blank(s)	45	200	3	0	3	11	0	10	No radiation and/or cancer-directed surgery	None	Alive or dead of other cause	Alive or dead due to cancer	116	Alive	One primary only	April	No/Unknown
4490057	2004	Male	47	Asian or Pacific Islander	Single (never married)	Rectosigmoid Junction	8140/3: Adenocarcinoma, NOS	C19.9-Rectosigmoid junction	Poorly differentiated; Grade III	Blank(s)	IIIC	Blank(s)	Blank(s)	T3	Blank(s)	Blank(s)	N2	30	4 or more regional lymph nodes removed	Blank(s)	Blank(s)	42	450	3	200	3	13	8	999	No radiation and/or cancer-directed surgery	None	Dead (attributable to this cancer dx)	Alive or dead due to cancer	18	Colon excluding Rectum	One primary only	May	Yes
4490083	2004	Female	79	White	Married (including common law)	Splenic Flexure	8480/3: Mucinous adenocarcinoma	C18.5-Splenic flexure of colon	Poorly differentiated; Grade III	Blank(s)	IIB	Blank(s)	Blank(s)	T4	Blank(s)	Blank(s)	N0	41	4 or more regional lymph nodes removed	Blank(s)	Blank(s)	90	660	3	0	3	4	0	10	No radiation and/or cancer-directed surgery	None	Dead (attributable to this cancer dx)	Alive or dead due to cancer	12	Colon excluding Rectum	One primary only	October	No/Unknown
4490094	2004	Female	78	Asian or Pacific Islander	Widowed	Cecum	8140/3: Adenocarcinoma, NOS	C18.0-Cecum	Moderately differentiated; Grade II	Blank(s)	IIIB	Blank(s)	Blank(s)	T3	Blank(s)	Blank(s)	N1	30	4 or more regional lymph nodes removed	Blank(s)	Blank(s)	40	450	3	100	3	18	1	999	No radiation and/or cancer-directed surgery	None	Alive or dead of other cause	Alive or dead due to cancer	111	Alive	One primary only	September	No/Unknown
4490357	2004	Male	62	White	Married (including common law)	Rectosigmoid Junction	8140/3: Adenocarcinoma, NOS	C19.9-Rectosigmoid junction	Well differentiated; Grade I	Blank(s)	I	Blank(s)	Blank(s)	T2	Blank(s)	Blank(s)	N0	20	4 or more regional lymph nodes removed	Blank(s)	Blank(s)	23	200	3	0	3	4	0	10	Radiation after surgery	Beam radiation	Alive or dead of other cause	Alive or dead due to cancer	117	Alive	One primary only	March	Yes
4490483	2004	Male	75	White	Married (including common law)	Sigmoid Colon	8140/3: Adenocarcinoma, NOS	C18.7-Sigmoid colon	Moderately differentiated; Grade II	Blank(s)	IIB	Blank(s)	Blank(s)	T4	Blank(s)	Blank(s)	N0	30	4 or more regional lymph nodes removed	Blank(s)	Blank(s)	30	500	3	0	3	8	0	20	No radiation and/or cancer-directed surgery	None	Alive or dead of other cause	Alive or dead due to cancer	113	Alive	One primary only	July	No/Unknown
4490494	2004	Male	80	White	Widowed	Cecum	8140/3: Adenocarcinoma, NOS	C18.0-Cecum	Poorly differentiated; Grade III	Blank(s)	IIA	Blank(s)	Blank(s)	T3	Blank(s)	Blank(s)	N0	40	4 or more regional lymph nodes removed	Blank(s)	Blank(s)	55	450	3	0	3	11	0	20	No radiation and/or cancer-directed surgery	None	Alive or dead of other cause	Alive or dead due to cancer	111	Alive	One primary only	September	No/Unknown
4490507	2004	Female	74	White	Widowed	Ascending Colon	8140/3: Adenocarcinoma, NOS	C18.2-Ascending colon	Moderately differentiated; Grade II	Blank(s)	I	Blank(s)	Blank(s)	T1	Blank(s)	Blank(s)	N0	40	4 or more regional lymph nodes removed	Blank(s)	Blank(s)	20	160	3	0	3	13	0	998	No radiation and/or cancer-directed surgery	None	Alive or dead of other cause	Alive or dead due to cancer	114	Alive	One primary only	June	No/Unknown
4490508	2004	Female	74	White	Married (including common law)	Cecum	8140/3: Adenocarcinoma, NOS	C18.0-Cecum	Moderately differentiated; Grade II	Blank(s)	IIA	Blank(s)	Blank(s)	T3	Blank(s)	Blank(s)	N0	40	4 or more regional lymph nodes removed	Blank(s)	Blank(s)	60	400	3	0	3	10	0	998	No radiation and/or cancer-directed surgery	None	Alive or dead of other cause	Dead (attributable to causes other than this cancer dx)	43	Chronic Obstructive Pulmonary Disease and Allied Cond	One primary only	July	No/Unknown
4490510	2004	Female	43	Asian or Pacific Islander	Married (including common law)	Sigmoid Colon	8140/3: Adenocarcinoma, NOS	C18.7-Sigmoid colon	Well differentiated; Grade I	Blank(s)	IIIA	Blank(s)	Blank(s)	T2	Blank(s)	Blank(s)	N1	80	4 or more regional lymph nodes removed	Blank(s)	Blank(s)	45	200	3	200	0	17	2	10	No radiation and/or cancer-directed surgery	None	Alive or dead of other cause	Alive or dead due to cancer	112	Alive	One primary only	August	Yes
4490519	2004	Male	61	White	Married (including common law)	Sigmoid Colon	8140/3: Adenocarcinoma, NOS	C18.7-Sigmoid colon	Moderately differentiated; Grade II	Blank(s)	IIIB	Blank(s)	Blank(s)	T3	Blank(s)	Blank(s)	N1	30	4 or more regional lymph nodes removed	Blank(s)	Blank(s)	35	450	3	300	3	9	1	20	No radiation and/or cancer-directed surgery	None	Alive or dead of other cause	Alive or dead due to cancer	112	Alive	One primary only	August	Yes
4490523	2004	Female	69	White	Divorced	Cecum	8140/3: Adenocarcinoma, NOS	C18.0-Cecum	Moderately differentiated; Grade II	Blank(s)	IIA	Blank(s)	Blank(s)	T3	Blank(s)	Blank(s)	N0	40	4 or more regional lymph nodes removed	Blank(s)	Blank(s)	50	400	3	0	3	29	0	999	No radiation and/or cancer-directed surgery	None	Alive or dead of other cause	Alive or dead due to cancer	118	Alive	One primary only	February	No/Unknown
4490524	2004	Male	66	White	Married (including common law)	Rectum	8140/3: Adenocarcinoma, NOS	C20.9-Rectum, NOS	Moderately differentiated; Grade II	Blank(s)	I	Blank(s)	Blank(s)	T2	Blank(s)	Blank(s)	N0	50	4 or more regional lymph nodes removed	Blank(s)	Blank(s)	60	200	3	0	3	32	0	20	No radiation and/or cancer-directed surgery	None	Alive or dead of other cause	Alive or dead due to cancer	116	Alive	One primary only	April	No/Unknown
4490558	2004	Female	56	White	Married (including common law)	Cecum	8140/3: Adenocarcinoma, NOS	C18.0-Cecum	Well differentiated; Grade I	Blank(s)	IIA	Blank(s)	Blank(s)	T3	Blank(s)	Blank(s)	N0	80	4 or more regional lymph nodes removed	Blank(s)	Blank(s)	30	400	3	0	3	20	0	20	No radiation and/or cancer-directed surgery	None	Alive or dead of other cause	Alive or dead due to cancer	112	Alive	One primary only	August	Yes
4490562	2004	Male	70	White	Single (never married)	Splenic Flexure	8140/3: Adenocarcinoma, NOS	C18.5-Splenic flexure of colon	Moderately differentiated; Grade II	Blank(s)	IIA	Blank(s)	Blank(s)	T3	Blank(s)	Blank(s)	N0	30	4 or more regional lymph nodes removed	Blank(s)	Blank(s)	30	450	3	0	3	12	0	10	No radiation and/or cancer-directed surgery	None	Dead (attributable to this cancer dx)	Alive or dead due to cancer	1	Colon excluding Rectum	One primary only	July	No/Unknown
4490572	2004	Male	55	Asian or Pacific Islander	Married (including common law)	Sigmoid Colon	8480/3: Mucinous adenocarcinoma	C18.7-Sigmoid colon	Moderately differentiated; Grade II	Blank(s)	IIIA	Blank(s)	Blank(s)	T2	Blank(s)	Blank(s)	N1	30	1 to 3 regional lymph nodes removed	Blank(s)	Blank(s)	45	200	3	100	3	40	1	998	No radiation and/or cancer-directed surgery	None	Alive or dead of other cause	Alive or dead due to cancer	112	Alive	One primary only	August	Yes
4490679	2004	Male	78	Black	Married (including common law)	Rectum	8140/3: Adenocarcinoma, NOS	C20.9-Rectum, NOS	Well differentiated; Grade I	Blank(s)	IIA	Blank(s)	Blank(s)	T3	Blank(s)	Blank(s)	N0	30	4 or more regional lymph nodes removed	Blank(s)	Blank(s)	75	450	3	0	3	12	0	10	Radiation after surgery	Beam radiation	Dead (attributable to this cancer dx)	Alive or dead due to cancer	18	Colon excluding Rectum	One primary only	August	Yes
4490936	2004	Male	64	White	Married (including common law)	Sigmoid Colon	8140/3: Adenocarcinoma, NOS	C18.7-Sigmoid colon	Moderately differentiated; Grade II	Blank(s)	IIIB	Blank(s)	Blank(s)	T3	Blank(s)	Blank(s)	N1	30	4 or more regional lymph nodes removed	Blank(s)	Blank(s)	999	450	3	100	3	6	2	20	No radiation and/or cancer-directed surgery	None	Dead (attributable to this cancer dx)	Alive or dead due to cancer	57	Colon excluding Rectum	One primary only	September	Yes
4491173	2004	Male	57	White	Married (including common law)	Large Intestine, NOS	8140/3: Adenocarcinoma, NOS	C18.8-Overlapping lesion of colon	Moderately differentiated; Grade II	Blank(s)	IIIA	Blank(s)	Blank(s)	T2	Blank(s)	Blank(s)	N1	30	4 or more regional lymph nodes removed	Blank(s)	Blank(s)	40	200	3	100	3	13	1	999	No radiation and/or cancer-directed surgery	None	Alive or dead of other cause	Alive or dead due to cancer	119	Alive	One primary only	January	Yes
4491182	2004	Male	71	White	Married (including common law)	Rectosigmoid Junction	8140/3: Adenocarcinoma, NOS	C19.9-Rectosigmoid junction	Moderately differentiated; Grade II	Blank(s)	IIIB	Blank(s)	Blank(s)	T3	Blank(s)	Blank(s)	N1	30	4 or more regional lymph nodes removed	Blank(s)	Blank(s)	999	450	3	100	3	9	3	20	Radiation after surgery	Beam radiation	Dead (attributable to this cancer dx)	Alive or dead due to cancer	28	Rectum and Rectosigmoid Junction	One primary only	June	Yes
4491217	2004	Male	45	White	Single (never married)	Rectum	8140/3: Adenocarcinoma, NOS	C20.9-Rectum, NOS	Moderately differentiated; Grade II	Blank(s)	IIB	Blank(s)	Blank(s)	T4	Blank(s)	Blank(s)	N0	30	1 to 3 regional lymph nodes removed	Blank(s)	Blank(s)	999	610	3	0	6	1	0	998	Intraoperative radiation	Beam radiation	Dead (attributable to this cancer dx)	Alive or dead due to cancer	19	Rectum and Rectosigmoid Junction	One primary only	February	Yes
4491335	2004	Female	80	Asian or Pacific Islander	Widowed	Descending Colon	8140/3: Adenocarcinoma, NOS	C18.6-Descending colon	Moderately differentiated; Grade II	Blank(s)	IIA	Blank(s)	Blank(s)	T3	Blank(s)	Blank(s)	N0	40	4 or more regional lymph nodes removed	Blank(s)	Blank(s)	40	400	3	0	3	4	0	998	No radiation and/or cancer-directed surgery	None	Alive or dead of other cause	Alive or dead due to cancer	118	Alive	One primary only	February	No/Unknown
4491340	2004	Female	39	Asian or Pacific Islander	Married (including common law)	Cecum	8481/3: Mucin-producing adenocarcinoma	C18.0-Cecum	Poorly differentiated; Grade III	Blank(s)	IIIC	Blank(s)	Blank(s)	T4	Blank(s)	Blank(s)	N2	40	4 or more regional lymph nodes removed	Blank(s)	Blank(s)	999	500	9	300	3	12	5	10	No radiation and/or cancer-directed surgery	None	Alive or dead of other cause	Alive or dead due to cancer	119	Alive	One primary only	January	Yes
4491372	2004	Male	59	White	Single (never married)	Splenic Flexure	8140/3: Adenocarcinoma, NOS	C18.5-Splenic flexure of colon	Poorly differentiated; Grade III	Blank(s)	IIA	Blank(s)	Blank(s)	T3	Blank(s)	Blank(s)	N0	40	4 or more regional lymph nodes removed	Blank(s)	Blank(s)	15	450	3	0	3	5	0	30	No radiation and/or cancer-directed surgery	None	Dead (attributable to this cancer dx)	Alive or dead due to cancer	31	Colon excluding Rectum	One primary only	January	No/Unknown
4491379	2004	Female	57	White	Divorced	Cecum	8481/3: Mucin-producing adenocarcinoma	C18.0-Cecum	Well differentiated; Grade I	Blank(s)	I	Blank(s)	Blank(s)	T2	Blank(s)	Blank(s)	N0	40	4 or more regional lymph nodes removed	Blank(s)	Blank(s)	40	200	3	0	3	14	0	20	No radiation and/or cancer-directed surgery	None	Alive or dead of other cause	Alive or dead due to cancer	114	Alive	One primary only	June	No/Unknown
4491382	2004	Male	80	White	Married (including common law)	Sigmoid Colon	8140/3: Adenocarcinoma, NOS	C18.7-Sigmoid colon	Moderately differentiated; Grade II	Blank(s)	IIA	Blank(s)	Blank(s)	T3	Blank(s)	Blank(s)	N0	40	1 to 3 regional lymph nodes removed	Blank(s)	Blank(s)	50	400	3	0	3	2	0	10	No radiation and/or cancer-directed surgery	None	Dead (attributable to this cancer dx)	Alive or dead due to cancer	23	Colon excluding Rectum	One primary only	June	No/Unknown
4491384	2004	Female	71	Asian or Pacific Islander	Married (including common law)	Sigmoid Colon	8140/3: Adenocarcinoma, NOS	C18.7-Sigmoid colon	Moderately differentiated; Grade II	Blank(s)	I	Blank(s)	Blank(s)	T2	Blank(s)	Blank(s)	N0	40	4 or more regional lymph nodes removed	Blank(s)	Blank(s)	40	200	3	0	3	7	0	20	No radiation and/or cancer-directed surgery	None	Alive or dead of other cause	Alive or dead due to cancer	114	Alive	One primary only	June	No/Unknown
4491393	2004	Male	64	White	Married (including common law)	Rectum	8140/3: Adenocarcinoma, NOS	C20.9-Rectum, NOS	Moderately differentiated; Grade II	Blank(s)	IIIB	Blank(s)	Blank(s)	T3	Blank(s)	Blank(s)	N1	30	4 or more regional lymph nodes removed	Blank(s)	Blank(s)	999	450	3	100	3	11	3	999	Radiation prior to surgery	Beam radiation	Alive or dead of other cause	Alive or dead due to cancer	116	Alive	One primary only	April	Yes
4491437	2004	Female	55	White	Married (including common law)	Rectum	8140/3: Adenocarcinoma, NOS	C20.9-Rectum, NOS	Poorly differentiated; Grade III	Blank(s)	IIA	Blank(s)	Blank(s)	T3	Blank(s)	Blank(s)	N0	30	4 or more regional lymph nodes removed	Blank(s)	Blank(s)	70	400	5	0	5	4	0	20	Radiation prior to surgery	Beam radiation	Dead (attributable to this cancer dx)	Alive or dead due to cancer	76	Miscellaneous Malignant Cancer	One primary only	October	Yes
4491810	2004	Female	67	White	Married (including common law)	Cecum	8140/3: Adenocarcinoma, NOS	C18.0-Cecum	Poorly differentiated; Grade III	Blank(s)	IIIC	Blank(s)	Blank(s)	T3	Blank(s)	Blank(s)	N2	40	4 or more regional lymph nodes removed	Blank(s)	Blank(s)	45	450	3	300	3	6	5	10	No radiation and/or cancer-directed surgery	None	Dead (attributable to this cancer dx)	Alive or dead due to cancer	36	Colon excluding Rectum	One primary only	August	No/Unknown
4492205	2004	Female	57	White	Widowed	Rectosigmoid Junction	8140/3: Adenocarcinoma, NOS	C19.9-Rectosigmoid junction	Moderately differentiated; Grade II	Blank(s)	IIA	Blank(s)	Blank(s)	T3	Blank(s)	Blank(s)	N0	30	1 to 3 regional lymph nodes removed	Blank(s)	Blank(s)	40	400	3	0	3	2	0	998	Radiation after surgery	Beam radiation	Alive or dead of other cause	Alive or dead due to cancer	109	Alive	One primary only	November	Yes
4492208	2004	Male	70	White	Divorced	Rectosigmoid Junction	8140/3: Adenocarcinoma, NOS	C19.9-Rectosigmoid junction	Moderately differentiated; Grade II	Blank(s)	IIA	Blank(s)	Blank(s)	T3	Blank(s)	Blank(s)	N0	30	None	Blank(s)	Blank(s)	50	450	3	0	0	0	98	998	No radiation and/or cancer-directed surgery	None	Dead (attributable to this cancer dx)	Alive or dead due to cancer	50	Rectum and Rectosigmoid Junction	One primary only	November	Yes
4492213	2004	Female	57	White	Married (including common law)	Descending Colon	8140/3: Adenocarcinoma, NOS	C18.6-Descending colon	Moderately differentiated; Grade II	Blank(s)	IIIB	Blank(s)	Blank(s)	T3	Blank(s)	Blank(s)	N1	40	4 or more regional lymph nodes removed	Blank(s)	Blank(s)	35	450	3	300	3	21	1	998	No radiation and/or cancer-directed surgery	None	Alive or dead of other cause	Alive or dead due to cancer	1	Alive	One primary only	September	No/Unknown
4492238	2004	Male	49	White	Married (including common law)	Splenic Flexure	8480/3: Mucinous adenocarcinoma	C18.5-Splenic flexure of colon	Poorly differentiated; Grade III	Blank(s)	IIB	Blank(s)	Blank(s)	T4	Blank(s)	Blank(s)	N0	30	4 or more regional lymph nodes removed	Blank(s)	Blank(s)	45	500	3	0	3	21	0	20	No radiation and/or cancer-directed surgery	None	Alive or dead of other cause	Alive or dead due to cancer	117	Alive	One primary only	March	Yes
4492356	2004	Male	66	Asian or Pacific Islander	Married (including common law)	Sigmoid Colon	8140/3: Adenocarcinoma, NOS	C18.7-Sigmoid colon	Moderately differentiated; Grade II	Blank(s)	IIA	Blank(s)	Blank(s)	T3	Blank(s)	Blank(s)	N0	40	4 or more regional lymph nodes removed	Blank(s)	Blank(s)	45	400	3	0	3	9	0	10	No radiation and/or cancer-directed surgery	None	Alive or dead of other cause	Alive or dead due to cancer	111	Alive	One primary only	June	No/Unknown
4492367	2004	Male	74	Asian or Pacific Islander	Divorced	Sigmoid Colon	8140/3: Adenocarcinoma, NOS	C18.7-Sigmoid colon	Moderately differentiated; Grade II	Blank(s)	I	Blank(s)	Blank(s)	T2	Blank(s)	Blank(s)	N0	40	4 or more regional lymph nodes removed	Blank(s)	Blank(s)	15	200	3	0	3	7	0	998	No radiation and/or cancer-directed surgery	None	Dead (attributable to this cancer dx)	Alive or dead due to cancer	19	Other Cause of Death	One primary only	August	No/Unknown
4492369	2004	Female	70	Asian or Pacific Islander	Married (including common law)	Sigmoid Colon	8140/3: Adenocarcinoma, NOS	C18.7-Sigmoid colon	Moderately differentiated; Grade II	Blank(s)	I	Blank(s)	Blank(s)	T2	Blank(s)	Blank(s)	N0	30	4 or more regional lymph nodes removed	Blank(s)	Blank(s)	20	200	3	0	3	8	0	997	No radiation and/or cancer-directed surgery	None	Alive or dead of other cause	Alive or dead due to cancer	113	Alive	One primary only	July	No/Unknown
4492379	2004	Female	78	Asian or Pacific Islander	Widowed	Hepatic Flexure	8140/3: Adenocarcinoma, NOS	C18.3-Hepatic flexure of colon	Moderately differentiated; Grade II	Blank(s)	IIA	Blank(s)	Blank(s)	T3	Blank(s)	Blank(s)	N0	40	4 or more regional lymph nodes removed	Blank(s)	Blank(s)	25	450	3	0	3	11	0	20	No radiation and/or cancer-directed surgery	None	Alive or dead of other cause	Alive or dead due to cancer	112	Alive	One primary only	August	No/Unknown
4492398	2004	Female	78	Asian or Pacific Islander	Married (including common law)	Sigmoid Colon	8140/3: Adenocarcinoma, NOS	C18.7-Sigmoid colon	Moderately differentiated; Grade II	Blank(s)	IIIB	Blank(s)	Blank(s)	T3	Blank(s)	Blank(s)	N1	40	4 or more regional lymph nodes removed	Blank(s)	Blank(s)	40	450	3	100	3	7	1	20	No radiation and/or cancer-directed surgery	None	Alive or dead of other cause	Alive or dead due to cancer	111	Alive	One primary only	September	Yes
4492441	2004	Male	76	White	Married (including common law)	Ascending Colon	8480/3: Mucinous adenocarcinoma	C18.2-Ascending colon	Poorly differentiated; Grade III	Blank(s)	IIA	Blank(s)	Blank(s)	T3	Blank(s)	Blank(s)	N0	40	4 or more regional lymph nodes removed	Blank(s)	Blank(s)	45	400	3	0	3	15	0	10	No radiation and/or cancer-directed surgery	None	Alive or dead of other cause	Dead (attributable to causes other than this cancer dx)	98	Suicide and Self-Inflicted Injury	One primary only	May	No/Unknown
4492746	2004	Male	70	White	Married (including common law)	Sigmoid Colon	8140/3: Adenocarcinoma, NOS	C18.7-Sigmoid colon	Poorly differentiated; Grade III	Blank(s)	IIA	Blank(s)	Blank(s)	T3	Blank(s)	Blank(s)	N0	30	4 or more regional lymph nodes removed	Blank(s)	Blank(s)	999	450	3	0	3	6	0	20	No radiation and/or cancer-directed surgery	None	Alive or dead of other cause	Alive or dead due to cancer	115	Alive	One primary only	May	Yes
4492865	2004	Female	58	White	Married (including common law)	Appendix	8140/3: Adenocarcinoma, NOS	C18.1-Appendix	Moderately differentiated; Grade II	Blank(s)	IIB	Blank(s)	Blank(s)	T4	Blank(s)	Blank(s)	N0	40	4 or more regional lymph nodes removed	Blank(s)	Blank(s)	999	500	3	0	3	14	0	20	No radiation and/or cancer-directed surgery	None	Alive or dead of other cause	Alive or dead due to cancer	117	Alive	One primary only	March	Yes
4492869	2004	Male	51	Black	Single (never married)	Sigmoid Colon	8140/3: Adenocarcinoma, NOS	C18.7-Sigmoid colon	Moderately differentiated; Grade II	Blank(s)	IIIB	Blank(s)	Blank(s)	T4	Blank(s)	Blank(s)	N1	40	4 or more regional lymph nodes removed	Blank(s)	Blank(s)	75	500	3	100	3	23	2	10	No radiation and/or cancer-directed surgery	None	Dead (attributable to this cancer dx)	Alive or dead due to cancer	25	Colon excluding Rectum	One primary only	February	Yes
4492873	2004	Male	53	American Indian/Alaska Native	Divorced	Sigmoid Colon	8140/3: Adenocarcinoma, NOS	C18.7-Sigmoid colon	Moderately differentiated; Grade II	Blank(s)	IIIB	Blank(s)	Blank(s)	T3	Blank(s)	Blank(s)	N1	51	4 or more regional lymph nodes removed	Blank(s)	Blank(s)	90	400	3	100	3	20	0	20	No radiation and/or cancer-directed surgery	None	Alive or dead of other cause	Alive or dead due to cancer	119	Alive	One primary only	January	Yes
4492901	2004	Female	63	Asian or Pacific Islander	Divorced	Rectum	8140/3: Adenocarcinoma, NOS	C20.9-Rectum, NOS	Moderately differentiated; Grade II	Blank(s)	IIIB	Blank(s)	Blank(s)	T3	Blank(s)	Blank(s)	N1	30	None	Blank(s)	Blank(s)	50	450	3	100	1	0	98	10	Radiation prior to surgery	Beam radiation	Alive or dead of other cause	Dead (attributable to causes other than this cancer dx)	58	Diabetes Mellitus	One primary only	July	Yes
4493254	2004	Male	54	White	Married (including common law)	Descending Colon	8140/3: Adenocarcinoma, NOS	C18.6-Descending colon	Moderately differentiated; Grade II	Blank(s)	IIA	Blank(s)	Blank(s)	T3	Blank(s)	Blank(s)	N0	50	None	Blank(s)	Blank(s)	85	450	3	0	0	0	98	999	No radiation and/or cancer-directed surgery	None	Dead (attributable to this cancer dx)	Alive or dead due to cancer	66	Colon excluding Rectum	One primary only	July	Yes
4493263	2004	Female	45	White	Married (including common law)	Ascending Colon	8140/3: Adenocarcinoma, NOS	C18.2-Ascending colon	Moderately differentiated; Grade II	Blank(s)	IIA	Blank(s)	Blank(s)	T3	Blank(s)	Blank(s)	N0	40	4 or more regional lymph nodes removed	Blank(s)	Blank(s)	90	450	3	0	3	17	0	20	No radiation and/or cancer-directed surgery	None	Alive or dead of other cause	Alive or dead due to cancer	118	Alive	One primary only	February	No/Unknown
4493266	2004	Male	79	White	Married (including common law)	Rectum	8140/3: Adenocarcinoma, NOS	C20.9-Rectum, NOS	Poorly differentiated; Grade III	Blank(s)	I	Blank(s)	Blank(s)	T2	Blank(s)	Blank(s)	N0	27	None	Blank(s)	Blank(s)	999	200	3	0	0	0	98	10	Radiation after surgery	Beam radiation	Dead (attributable to this cancer dx)	Alive or dead due to cancer	20	Colon excluding Rectum	One primary only	January	No/Unknown
4493271	2004	Male	60	White	Married (including common law)	Cecum	8480/3: Mucinous adenocarcinoma	C18.0-Cecum	Well differentiated; Grade I	Blank(s)	IIA	Blank(s)	Blank(s)	T3	Blank(s)	Blank(s)	N0	40	4 or more regional lymph nodes removed	Blank(s)	Blank(s)	32	400	3	0	0	6	0	20	No radiation and/or cancer-directed surgery	None	Alive or dead of other cause	Alive or dead due to cancer	118	Alive	One primary only	February	No/Unknown
4493274	2004	Male	65	White	Married (including common law)	Hepatic Flexure	8140/3: Adenocarcinoma, NOS	C18.3-Hepatic flexure of colon	Poorly differentiated; Grade III	Blank(s)	IIIA	Blank(s)	Blank(s)	T2	Blank(s)	Blank(s)	N1	40	4 or more regional lymph nodes removed	Blank(s)	Blank(s)	28	200	3	100	3	11	3	10	No radiation and/or cancer-directed surgery	None	Dead (attributable to this cancer dx)	Alive or dead due to cancer	77	Colon excluding Rectum	One primary only	January	Yes
4493285	2004	Female	56	White	Married (including common law)	Ascending Colon	8140/3: Adenocarcinoma, NOS	C18.2-Ascending colon	Poorly differentiated; Grade III	Blank(s)	IIIB	Blank(s)	Blank(s)	T3	Blank(s)	Blank(s)	N1	30	4 or more regional lymph nodes removed	Blank(s)	Blank(s)	55	450	3	100	3	13	0	999	No radiation and/or cancer-directed surgery	None	Alive or dead of other cause	Alive or dead due to cancer	109	Alive	One primary only	November	No/Unknown
4493287	2004	Female	80	White	Divorced	Splenic Flexure	8140/3: Adenocarcinoma, NOS	C18.5-Splenic flexure of colon	Moderately differentiated; Grade II	Blank(s)	IIA	Blank(s)	Blank(s)	T3	Blank(s)	Blank(s)	N0	30	4 or more regional lymph nodes removed	Blank(s)	Blank(s)	20	400	3	0	3	12	0	999	No radiation and/or cancer-directed surgery	None	Alive or dead of other cause	Alive or dead due to cancer	112	Alive	One primary only	August	No/Unknown
4493290	2004	Male	57	White	Divorced	Descending Colon	8140/3: Adenocarcinoma, NOS	C18.6-Descending colon	Moderately differentiated; Grade II	Blank(s)	IIIB	Blank(s)	Blank(s)	T3	Blank(s)	Blank(s)	N1	30	4 or more regional lymph nodes removed	Blank(s)	Blank(s)	35	450	3	100	3	8	2	999	No radiation and/or cancer-directed surgery	None	Alive or dead of other cause	Alive or dead due to cancer	113	Alive	One primary only	July	No/Unknown
4493395	2004	Male	51	White	Married (including common law)	Appendix	8140/3: Adenocarcinoma, NOS	C18.1-Appendix	Moderately differentiated; Grade II	Blank(s)	IIIB	Blank(s)	Blank(s)	T4	Blank(s)	Blank(s)	N1	30	4 or more regional lymph nodes removed	Blank(s)	Blank(s)	999	500	3	800	3	9	1	20	Radiation after surgery	Beam radiation	Dead (attributable to this cancer dx)	Alive or dead due to cancer	26	Colon excluding Rectum	One primary only	August	Yes
4493465	2004	Male	33	Black	Married (including common law)	Cecum	8140/3: Adenocarcinoma, NOS	C18.0-Cecum	Moderately differentiated; Grade II	Blank(s)	IIA	Blank(s)	Blank(s)	T3	Blank(s)	Blank(s)	N0	40	4 or more regional lymph nodes removed	Blank(s)	Blank(s)	57	450	3	0	3	23	0	20	No radiation and/or cancer-directed surgery	None	Alive or dead of other cause	Alive or dead due to cancer	115	Alive	One primary only	May	No/Unknown
4493468	2004	Male	51	Asian or Pacific Islander	Married (including common law)	Rectum	8140/3: Adenocarcinoma, NOS	C20.9-Rectum, NOS	Moderately differentiated; Grade II	Blank(s)	IIA	Blank(s)	Blank(s)	T3	Blank(s)	Blank(s)	N0	50	1 to 3 regional lymph nodes removed	Blank(s)	Blank(s)	40	400	3	0	3	2	0	10	Radiation after surgery	Beam radiation	Alive or dead of other cause	Alive or dead due to cancer	117	Alive	One primary only	March	Yes
4493474	2004	Male	58	White	Married (including common law)	Hepatic Flexure	8480/3: Mucinous adenocarcinoma	C18.3-Hepatic flexure of colon	Moderately differentiated; Grade II	Blank(s)	IIA	Blank(s)	Blank(s)	T3	Blank(s)	Blank(s)	N0	40	4 or more regional lymph nodes removed	Blank(s)	Blank(s)	75	450	3	0	3	23	0	998	No radiation and/or cancer-directed surgery	None	Alive or dead of other cause	Alive or dead due to cancer	115	Alive	One primary only	May	No/Unknown
4493540	2004	Male	61	Asian or Pacific Islander	Widowed	Rectosigmoid Junction	8140/3: Adenocarcinoma, NOS	C19.9-Rectosigmoid junction	Poorly differentiated; Grade III	Blank(s)	IIA	Blank(s)	Blank(s)	T3	Blank(s)	Blank(s)	N0	30	4 or more regional lymph nodes removed	Blank(s)	Blank(s)	35	450	3	0	3	11	0	10	Radiation after surgery	Beam radiation	Alive or dead of other cause	Alive or dead due to cancer	115	Alive	One primary only	May	Yes
4493546	2004	Female	77	Black	Married (including common law)	Rectum	8140/3: Adenocarcinoma, NOS	C20.9-Rectum, NOS	Moderately differentiated; Grade II	Blank(s)	I	Blank(s)	Blank(s)	T1	Blank(s)	Blank(s)	N0	27	None	Blank(s)	Blank(s)	60	160	6	0	0	0	98	10	Radiation after surgery	Beam radiation	Alive or dead of other cause	Dead (attributable to causes other than this cancer dx)	86	Other Cause of Death	One primary only	June	Yes
4493775	2004	Male	53	White	Married (including common law)	Sigmoid Colon	8140/3: Adenocarcinoma, NOS	C18.7-Sigmoid colon	Moderately differentiated; Grade II	Blank(s)	I	Blank(s)	Blank(s)	T1	Blank(s)	Blank(s)	N0	30	4 or more regional lymph nodes removed	Blank(s)	Blank(s)	999	300	3	0	3	7	0	998	No radiation and/or cancer-directed surgery	None	Alive or dead of other cause	Alive or dead due to cancer	115	Alive	One primary only	May	No/Unknown
4496590	2004	Female	49	Asian or Pacific Islander	Married (including common law)	Sigmoid Colon	8140/3: Adenocarcinoma, NOS	C18.7-Sigmoid colon	Moderately differentiated; Grade II	Blank(s)	IIIB	Blank(s)	Blank(s)	T3	Blank(s)	Blank(s)	N1	30	4 or more regional lymph nodes removed	Blank(s)	Blank(s)	36	450	3	300	3	5	1	10	No radiation and/or cancer-directed surgery	None	Alive or dead of other cause	Dead (attributable to causes other than this cancer dx)	23	State DC not available or state DC available but no COD	One primary only	January	No/Unknown
4496593	2005	Male	80	White	Married (including common law)	Ascending Colon	8140/3: Adenocarcinoma, NOS	C18.2-Ascending colon	Moderately differentiated; Grade II	Blank(s)	I	Blank(s)	Blank(s)	T1	Blank(s)	Blank(s)	N0	40	4 or more regional lymph nodes removed	Blank(s)	Blank(s)	5	160	3	0	3	5	0	999	No radiation and/or cancer-directed surgery	None	Alive or dead of other cause	Dead (attributable to causes other than this cancer dx)	100	Diseases of Heart	One primary only	January	No/Unknown
4496595	2004	Male	71	Asian or Pacific Islander	Married (including common law)	Cecum	8140/3: Adenocarcinoma, NOS	C18.0-Cecum	Moderately differentiated; Grade II	Blank(s)	IIA	Blank(s)	Blank(s)	T3	Blank(s)	Blank(s)	N0	40	4 or more regional lymph nodes removed	Blank(s)	Blank(s)	41	400	3	0	3	6	0	20	No radiation and/or cancer-directed surgery	None	Alive or dead of other cause	Alive or dead due to cancer	118	Alive	One primary only	February	No/Unknown
4498195	2005	Male	75	White	Widowed	Hepatic Flexure	8140/3: Adenocarcinoma, NOS	C18.3-Hepatic flexure of colon	Poorly differentiated; Grade III	Blank(s)	IIA	Blank(s)	Blank(s)	T3	Blank(s)	Blank(s)	N0	30	4 or more regional lymph nodes removed	Blank(s)	Blank(s)	65	400	3	0	0	10	0	997	No radiation and/or cancer-directed surgery	None	Alive or dead of other cause	Dead (attributable to causes other than this cancer dx)	53	Other Cause of Death	One primary only	February	No/Unknown
4499375	2004	Male	79	White	Married (including common law)	Transverse Colon	8480/3: Mucinous adenocarcinoma	C18.4-Transverse colon	Moderately differentiated; Grade II	Blank(s)	IIA	Blank(s)	Blank(s)	T3	Blank(s)	Blank(s)	N0	40	4 or more regional lymph nodes removed	Blank(s)	Blank(s)	100	450	3	0	3	19	0	998	No radiation and/or cancer-directed surgery	None	Dead (attributable to this cancer dx)	Alive or dead due to cancer	8	Colon excluding Rectum	One primary only	July	Yes
4499385	2004	Male	46	White	Married (including common law)	Cecum	8140/3: Adenocarcinoma, NOS	C18.0-Cecum	Poorly differentiated; Grade III	Blank(s)	IIIC	Blank(s)	Blank(s)	T4	Blank(s)	Blank(s)	N2	40	4 or more regional lymph nodes removed	Blank(s)	Blank(s)	80	500	3	100	3	10	10	20	No radiation and/or cancer-directed surgery	None	Alive or dead of other cause	Alive or dead due to cancer	112	Alive	One primary only	August	Yes
4499407	2004	Female	69	Asian or Pacific Islander	Married (including common law)	Sigmoid Colon	8140/3: Adenocarcinoma, NOS	C18.7-Sigmoid colon	Moderately differentiated; Grade II	Blank(s)	IIIC	Blank(s)	Blank(s)	T2	Blank(s)	Blank(s)	N2	30	4 or more regional lymph nodes removed	Blank(s)	Blank(s)	40	200	3	300	3	18	5	20	No radiation and/or cancer-directed surgery	None	Alive or dead of other cause	Alive or dead due to cancer	111	Alive	One primary only	September	Yes
4499465	2004	Female	73	Asian or Pacific Islander	Widowed	Cecum	8140/3: Adenocarcinoma, NOS	C18.0-Cecum	Poorly differentiated; Grade III	Blank(s)	IIIC	Blank(s)	Blank(s)	T3	Blank(s)	Blank(s)	N2	40	4 or more regional lymph nodes removed	Blank(s)	Blank(s)	65	400	3	100	3	15	9	20	No radiation and/or cancer-directed surgery	None	Alive or dead of other cause	Alive or dead due to cancer	110	Alive	One primary only	October	Yes
4499467	2004	Female	64	White	Widowed	Sigmoid Colon	8480/3: Mucinous adenocarcinoma	C18.7-Sigmoid colon	Well differentiated; Grade I	Blank(s)	IIA	Blank(s)	Blank(s)	T3	Blank(s)	Blank(s)	N0	30	4 or more regional lymph nodes removed	Blank(s)	Blank(s)	35	450	3	0	3	10	0	998	No radiation and/or cancer-directed surgery	None	Dead (attributable to this cancer dx)	Alive or dead due to cancer	33	Colon excluding Rectum	One primary only	November	No/Unknown
4499470	2004	Female	73	White	Single (never married)	Ascending Colon	8140/3: Adenocarcinoma, NOS	C18.2-Ascending colon	Poorly differentiated; Grade III	Blank(s)	IIA	Blank(s)	Blank(s)	T3	Blank(s)	Blank(s)	N0	30	4 or more regional lymph nodes removed	Blank(s)	Blank(s)	60	450	3	0	3	12	0	20	No radiation and/or cancer-directed surgery	None	Alive or dead of other cause	Dead (attributable to causes other than this cancer dx)	100	Cerebrovascular Diseases	One primary only	October	Yes
4499484	2004	Female	77	White	Divorced	Rectum	8140/3: Adenocarcinoma, NOS	C20.9-Rectum, NOS	Moderately differentiated; Grade II	Blank(s)	I	Blank(s)	Blank(s)	T1	Blank(s)	Blank(s)	N0	30	4 or more regional lymph nodes removed	Blank(s)	Blank(s)	16	160	3	0	3	6	0	998	No radiation and/or cancer-directed surgery	None	Alive or dead of other cause	Dead (attributable to causes other than this cancer dx)	103	Septicemia	One primary only	September	No/Unknown
4500015	2004	Female	54	White	Married (including common law)	Rectum	8140/3: Adenocarcinoma, NOS	C20.9-Rectum, NOS	Moderately differentiated; Grade II	Blank(s)	IIIB	Blank(s)	Blank(s)	T3	Blank(s)	Blank(s)	N1	30	1 to 3 regional lymph nodes removed	Blank(s)	Blank(s)	25	400	3	100	1	3	0	10	Radiation prior to surgery	Beam radiation	Alive or dead of other cause	Alive or dead due to cancer	116	Alive	One primary only	April	Yes
4500024	2004	Female	66	White	Married (including common law)	Rectosigmoid Junction	8140/3: Adenocarcinoma, NOS	C19.9-Rectosigmoid junction	Moderately differentiated; Grade II	Blank(s)	IIA	Blank(s)	Blank(s)	T3	Blank(s)	Blank(s)	N0	30	4 or more regional lymph nodes removed	Blank(s)	Blank(s)	38	400	3	0	3	15	0	10	No radiation and/or cancer-directed surgery	None	Alive or dead of other cause	Alive or dead due to cancer	116	Alive	One primary only	April	No/Unknown
4500550	2004	Female	55	Asian or Pacific Islander	Divorced	Sigmoid Colon	8140/3: Adenocarcinoma, NOS	C18.7-Sigmoid colon	Moderately differentiated; Grade II	Blank(s)	IIIC	Blank(s)	Blank(s)	T3	Blank(s)	Blank(s)	N2	30	4 or more regional lymph nodes removed	Blank(s)	Blank(s)	30	400	3	100	3	20	4	999	No radiation and/or cancer-directed surgery	None	Alive or dead of other cause	Alive or dead due to cancer	111	Alive	One primary only	September	Yes
4500621	2004	Male	70	White	Single (never married)	Rectum	8140/3: Adenocarcinoma, NOS	C20.9-Rectum, NOS	Poorly differentiated; Grade III	Blank(s)	IIA	Blank(s)	Blank(s)	T3	Blank(s)	Blank(s)	N0	50	4 or more regional lymph nodes removed	Blank(s)	Blank(s)	75	450	3	0	3	8	0	998	Radiation after surgery	Beam radiation	Dead (attributable to this cancer dx)	Alive or dead due to cancer	12	Rectum and Rectosigmoid Junction	One primary only	May	No/Unknown
4500804	2004	Female	67	White	Married (including common law)	Ascending Colon	8140/3: Adenocarcinoma, NOS	C18.2-Ascending colon	Moderately differentiated; Grade II	Blank(s)	IIIA	Blank(s)	Blank(s)	T2	Blank(s)	Blank(s)	N1	40	4 or more regional lymph nodes removed	Blank(s)	Blank(s)	30	200	3	300	3	22	1	20	No radiation and/or cancer-directed surgery	None	Alive or dead of other cause	Alive or dead due to cancer	116	Alive	One primary only	April	Yes
4501048	2004	Male	70	White	Divorced	Cecum	8140/3: Adenocarcinoma, NOS	C18.0-Cecum	Moderately differentiated; Grade II	Blank(s)	IIA	Blank(s)	Blank(s)	T3	Blank(s)	Blank(s)	N0	30	4 or more regional lymph nodes removed	Blank(s)	Blank(s)	50	450	3	0	3	31	0	20	No radiation and/or cancer-directed surgery	None	Alive or dead of other cause	Alive or dead due to cancer	60	Alive	One primary only	June	No/Unknown
4501076	2004	Male	56	Black	Single (never married)	Splenic Flexure	8480/3: Mucinous adenocarcinoma	C18.5-Splenic flexure of colon	Moderately differentiated; Grade II	Blank(s)	IIIB	Blank(s)	Blank(s)	T4	Blank(s)	Blank(s)	N1	30	4 or more regional lymph nodes removed	Blank(s)	Blank(s)	100	600	3	100	3	15	3	999	No radiation and/or cancer-directed surgery	Recommended, unknown if administered	Alive or dead of other cause	Alive or dead due to cancer	114	Alive	One primary only	June	No/Unknown
4501080	2004	Female	63	White	Married (including common law)	Cecum	8140/3: Adenocarcinoma, NOS	C18.0-Cecum	Moderately differentiated; Grade II	Blank(s)	I	Blank(s)	Blank(s)	T2	Blank(s)	Blank(s)	N0	30	4 or more regional lymph nodes removed	Blank(s)	Blank(s)	60	200	3	0	3	15	0	20	No radiation and/or cancer-directed surgery	None	Alive or dead of other cause	Alive or dead due to cancer	114	Alive	One primary only	June	No/Unknown
4501114	2004	Male	72	Black	Married (including common law)	Sigmoid Colon	8140/3: Adenocarcinoma, NOS	C18.7-Sigmoid colon	Moderately differentiated; Grade II	Blank(s)	IIA	Blank(s)	Blank(s)	T3	Blank(s)	Blank(s)	N0	30	4 or more regional lymph nodes removed	Blank(s)	Blank(s)	999	400	3	0	3	13	0	10	No radiation and/or cancer-directed surgery	None	Alive or dead of other cause	Dead (attributable to causes other than this cancer dx)	44	Other Cause of Death	One primary only	August	No/Unknown
4501130	2004	Female	75	Asian or Pacific Islander	Married (including common law)	Sigmoid Colon	8140/3: Adenocarcinoma, NOS	C18.7-Sigmoid colon	Moderately differentiated; Grade II	Blank(s)	IIA	Blank(s)	Blank(s)	T3	Blank(s)	Blank(s)	N0	30	4 or more regional lymph nodes removed	Blank(s)	Blank(s)	57	400	3	0	3	32	0	10	No radiation and/or cancer-directed surgery	None	Alive or dead of other cause	Alive or dead due to cancer	115	Alive	One primary only	May	No/Unknown
4501132	2004	Female	78	White	Widowed	Transverse Colon	8140/3: Adenocarcinoma, NOS	C18.4-Transverse colon	Moderately differentiated; Grade II	Blank(s)	IIIC	Blank(s)	Blank(s)	T3	Blank(s)	Blank(s)	N2	30	4 or more regional lymph nodes removed	Blank(s)	Blank(s)	46	400	3	100	3	14	6	998	No radiation and/or cancer-directed surgery	None	Dead (attributable to this cancer dx)	Alive or dead due to cancer	22	Colon excluding Rectum	One primary only	June	Yes
4501170	2004	Male	78	Asian or Pacific Islander	Married (including common law)	Cecum	8481/3: Mucin-producing adenocarcinoma	C18.0-Cecum	Poorly differentiated; Grade III	Blank(s)	IIA	Blank(s)	Blank(s)	T3	Blank(s)	Blank(s)	N0	40	4 or more regional lymph nodes removed	Blank(s)	Blank(s)	6	400	3	0	3	11	0	998	No radiation and/or cancer-directed surgery	None	Alive or dead of other cause	Dead (attributable to causes other than this cancer dx)	26	Chronic Obstructive Pulmonary Disease and Allied Cond	One primary only	March	No/Unknown
4501173	2004	Female	78	Asian or Pacific Islander	Married (including common law)	Sigmoid Colon	8140/3: Adenocarcinoma, NOS	C18.7-Sigmoid colon	Moderately differentiated; Grade II	Blank(s)	I	Blank(s)	Blank(s)	T1	Blank(s)	Blank(s)	N0	30	4 or more regional lymph nodes removed	Blank(s)	Blank(s)	20	160	3	0	3	10	0	999	No radiation and/or cancer-directed surgery	None	Alive or dead of other cause	Dead (attributable to causes other than this cancer dx)	78	Hypertension without Heart Disease	One primary only	March	No/Unknown
4501228	2004	Male	74	White	Separated	Rectum	8140/3: Adenocarcinoma, NOS	C20.9-Rectum, NOS	Moderately differentiated; Grade II	Blank(s)	IIA	Blank(s)	Blank(s)	T3	Blank(s)	Blank(s)	N0	0	None	Blank(s)	Blank(s)	60	458	6	0	6	4	0	30	No radiation and/or cancer-directed surgery	Beam radiation	Alive or dead of other cause	Alive or dead due to cancer	95	Alive	One primary only	February	Yes
4501265	2004	Female	75	White	Married (including common law)	Rectum	8140/3: Adenocarcinoma, NOS	C20.9-Rectum, NOS	Moderately differentiated; Grade II	Blank(s)	IIA	Blank(s)	Blank(s)	T3	Blank(s)	Blank(s)	N0	50	None	Blank(s)	Blank(s)	39	400	1	0	0	0	98	10	Radiation prior to surgery	Beam radiation	Alive or dead of other cause	Alive or dead due to cancer	114	Alive	One primary only	June	Yes
4501270	2004	Female	80	White	Married (including common law)	Rectosigmoid Junction	8140/3: Adenocarcinoma, NOS	C19.9-Rectosigmoid junction	Moderately differentiated; Grade II	Blank(s)	IIIB	Blank(s)	Blank(s)	T3	Blank(s)	Blank(s)	N1	30	4 or more regional lymph nodes removed	Blank(s)	Blank(s)	45	450	3	100	3	12	3	20	Radiation prior to surgery	Beam radiation	Dead (attributable to this cancer dx)	Alive or dead due to cancer	24	Rectum and Rectosigmoid Junction	One primary only	June	Yes
4501344	2004	Male	71	Black	Divorced	Rectum	8140/3: Adenocarcinoma, NOS	C20.9-Rectum, NOS	Moderately differentiated; Grade II	Blank(s)	IIIB	Blank(s)	Blank(s)	T3	Blank(s)	Blank(s)	N1	30	4 or more regional lymph nodes removed	Blank(s)	Blank(s)	28	400	3	100	3	29	1	998	No radiation and/or cancer-directed surgery	None	Alive or dead of other cause	Dead (attributable to causes other than this cancer dx)	82	Diseases of Heart	One primary only	May	No/Unknown
4501361	2004	Female	65	Black	Separated	Rectosigmoid Junction	8140/3: Adenocarcinoma, NOS	C19.9-Rectosigmoid junction	Moderately differentiated; Grade II	Blank(s)	IIA	Blank(s)	Blank(s)	T3	Blank(s)	Blank(s)	N0	30	4 or more regional lymph nodes removed	Blank(s)	Blank(s)	98	400	3	0	3	51	0	10	No radiation and/or cancer-directed surgery	None	Alive or dead of other cause	Alive or dead due to cancer	116	Alive	One primary only	April	No/Unknown
4501373	2004	Male	49	White	Married (including common law)	Rectum	8140/3: Adenocarcinoma, NOS	C20.9-Rectum, NOS	Moderately differentiated; Grade II	Blank(s)	IIIC	Blank(s)	Blank(s)	T3	Blank(s)	Blank(s)	N2	30	4 or more regional lymph nodes removed	Blank(s)	Blank(s)	45	450	3	200	3	28	8	20	Radiation after surgery	Beam radiation	Alive or dead of other cause	Alive or dead due to cancer	118	Alive	One primary only	February	Yes
4501376	2004	Male	71	White	Married (including common law)	Splenic Flexure	8140/3: Adenocarcinoma, NOS	C18.5-Splenic flexure of colon	Moderately differentiated; Grade II	Blank(s)	IIIB	Blank(s)	Blank(s)	T4	Blank(s)	Blank(s)	N1	30	4 or more regional lymph nodes removed	Blank(s)	Blank(s)	90	500	3	100	3	15	1	20	No radiation and/or cancer-directed surgery	None	Alive or dead of other cause	Alive or dead due to cancer	113	Alive	One primary only	July	Yes
4501386	2004	Male	74	Asian or Pacific Islander	Married (including common law)	Sigmoid Colon	8140/3: Adenocarcinoma, NOS	C18.7-Sigmoid colon	Moderately differentiated; Grade II	Blank(s)	IIIB	Blank(s)	Blank(s)	T3	Blank(s)	Blank(s)	N1	30	4 or more regional lymph nodes removed	Blank(s)	Blank(s)	40	400	3	300	3	21	1	998	No radiation and/or cancer-directed surgery	None	Alive or dead of other cause	Alive or dead due to cancer	112	Alive	One primary only	August	Yes
4501398	2004	Female	69	White	Single (never married)	Sigmoid Colon	8140/3: Adenocarcinoma, NOS	C18.7-Sigmoid colon	Moderately differentiated; Grade II	Blank(s)	IIIC	Blank(s)	Blank(s)	T3	Blank(s)	Blank(s)	N2	30	4 or more regional lymph nodes removed	Blank(s)	Blank(s)	50	450	3	100	3	18	10	20	No radiation and/or cancer-directed surgery	None	Alive or dead of other cause	Alive or dead due to cancer	6	Alive	One primary only	October	Yes
4501399	2004	Male	67	Black	Married (including common law)	Sigmoid Colon	8140/3: Adenocarcinoma, NOS	C18.7-Sigmoid colon	Moderately differentiated; Grade II	Blank(s)	IIIA	Blank(s)	Blank(s)	T1	Blank(s)	Blank(s)	N1	30	4 or more regional lymph nodes removed	Blank(s)	Blank(s)	12	160	3	100	3	4	0	20	No radiation and/or cancer-directed surgery	None	Alive or dead of other cause	Alive or dead due to cancer	111	Alive	One primary only	September	No/Unknown
4501416	2004	Male	73	Asian or Pacific Islander	Married (including common law)	Ascending Colon	8140/3: Adenocarcinoma, NOS	C18.2-Ascending colon	Moderately differentiated; Grade II	Blank(s)	IIA	Blank(s)	Blank(s)	T3	Blank(s)	Blank(s)	N0	40	4 or more regional lymph nodes removed	Blank(s)	Blank(s)	55	450	3	0	3	10	0	20	No radiation and/or cancer-directed surgery	None	Dead (attributable to this cancer dx)	Alive or dead due to cancer	43	Colon excluding Rectum	One primary only	June	No/Unknown
4501443	2004	Male	53	Asian or Pacific Islander	Married (including common law)	Sigmoid Colon	8140/3: Adenocarcinoma, NOS	C18.7-Sigmoid colon	Moderately differentiated; Grade II	Blank(s)	IIA	Blank(s)	Blank(s)	T3	Blank(s)	Blank(s)	N0	30	4 or more regional lymph nodes removed	Blank(s)	Blank(s)	25	450	3	0	3	9	0	20	No radiation and/or cancer-directed surgery	None	Alive or dead of other cause	Alive or dead due to cancer	111	Alive	One primary only	September	No/Unknown
4501453	2004	Female	59	White	Married (including common law)	Transverse Colon	8140/3: Adenocarcinoma, NOS	C18.4-Transverse colon	Moderately differentiated; Grade II	Blank(s)	IIA	Blank(s)	Blank(s)	T3	Blank(s)	Blank(s)	N0	30	4 or more regional lymph nodes removed	Blank(s)	Blank(s)	20	400	3	0	3	8	0	20	No radiation and/or cancer-directed surgery	None	Alive or dead of other cause	Alive or dead due to cancer	113	Alive	One primary only	July	Yes
4501455	2004	Male	45	White	Married (including common law)	Cecum	8480/3: Mucinous adenocarcinoma	C18.0-Cecum	Moderately differentiated; Grade II	Blank(s)	IIIB	Blank(s)	Blank(s)	T3	Blank(s)	Blank(s)	N1	40	4 or more regional lymph nodes removed	Blank(s)	Blank(s)	999	450	3	100	3	20	1	20	No radiation and/or cancer-directed surgery	None	Alive or dead of other cause	Alive or dead due to cancer	113	Alive	One primary only	July	Yes
4501491	2004	Male	68	White	Married (including common law)	Ascending Colon	8140/3: Adenocarcinoma, NOS	C18.2-Ascending colon	Moderately differentiated; Grade II	Blank(s)	IIA	Blank(s)	Blank(s)	T3	Blank(s)	Blank(s)	N0	40	4 or more regional lymph nodes removed	Blank(s)	Blank(s)	10	450	3	0	3	7	0	10	No radiation and/or cancer-directed surgery	None	Alive or dead of other cause	Alive or dead due to cancer	112	Alive	One primary only	August	No/Unknown
4501496	2004	Female	60	White	Single (never married)	Transverse Colon	8140/3: Adenocarcinoma, NOS	C18.4-Transverse colon	Moderately differentiated; Grade II	Blank(s)	I	Blank(s)	Blank(s)	T2	Blank(s)	Blank(s)	N0	40	4 or more regional lymph nodes removed	Blank(s)	Blank(s)	999	200	3	0	3	8	0	998	No radiation and/or cancer-directed surgery	None	Alive or dead of other cause	Alive or dead due to cancer	112	Alive	One primary only	June	No/Unknown
4501499	2004	Female	54	Asian or Pacific Islander	Divorced	Ascending Colon	8140/3: Adenocarcinoma, NOS	C18.2-Ascending colon	Moderately differentiated; Grade II	Blank(s)	IIIC	Blank(s)	Blank(s)	T3	Blank(s)	Blank(s)	N2	40	4 or more regional lymph nodes removed	Blank(s)	Blank(s)	40	450	3	100	3	18	4	10	No radiation and/or cancer-directed surgery	None	Alive or dead of other cause	Alive or dead due to cancer	108	Alive	One primary only	December	Yes
4501509	2004	Male	65	Asian or Pacific Islander	Divorced	Transverse Colon	8140/3: Adenocarcinoma, NOS	C18.4-Transverse colon	Moderately differentiated; Grade II	Blank(s)	IIA	Blank(s)	Blank(s)	T3	Blank(s)	Blank(s)	N0	40	4 or more regional lymph nodes removed	Blank(s)	Blank(s)	30	450	3	0	3	12	0	20	No radiation and/or cancer-directed surgery	None	Alive or dead of other cause	Alive or dead due to cancer	111	Alive	One primary only	September	No/Unknown
4501658	2005	Male	64	White	Divorced	Splenic Flexure	8140/3: Adenocarcinoma, NOS	C18.5-Splenic flexure of colon	Moderately differentiated; Grade II	Blank(s)	IIA	Blank(s)	Blank(s)	T3	Blank(s)	Blank(s)	N0	40	4 or more regional lymph nodes removed	Blank(s)	Blank(s)	80	400	3	0	3	10	0	999	No radiation and/or cancer-directed surgery	None	Alive or dead of other cause	Alive or dead due to cancer	107	Alive	One primary only	January	No/Unknown
4502159	2004	Female	64	White	Widowed	Rectosigmoid Junction	8480/3: Mucinous adenocarcinoma	C19.9-Rectosigmoid junction	Moderately differentiated; Grade II	Blank(s)	IIIB	Blank(s)	Blank(s)	T4	Blank(s)	Blank(s)	N1	70	4 or more regional lymph nodes removed	Blank(s)	Blank(s)	90	700	3	100	0	4	97	20	Radiation prior to surgery	Beam radiation	Alive or dead of other cause	Alive or dead due to cancer	113	Alive	One primary only	July	Yes
4502362	2005	Male	65	White	Married (including common law)	Ascending Colon	8140/3: Adenocarcinoma, NOS	C18.2-Ascending colon	Moderately differentiated; Grade II	Blank(s)	IIA	Blank(s)	Blank(s)	T3	Blank(s)	Blank(s)	N0	40	4 or more regional lymph nodes removed	Blank(s)	Blank(s)	70	450	3	0	3	18	0	20	No radiation and/or cancer-directed surgery	None	Alive or dead of other cause	Alive or dead due to cancer	103	Alive	One primary only	May	No/Unknown
4502577	2004	Female	62	Asian or Pacific Islander	Married (including common law)	Ascending Colon	8140/3: Adenocarcinoma, NOS	C18.2-Ascending colon	Moderately differentiated; Grade II	Blank(s)	IIA	Blank(s)	Blank(s)	T3	Blank(s)	Blank(s)	N0	40	4 or more regional lymph nodes removed	Blank(s)	Blank(s)	80	458	1	0	3	8	0	998	No radiation and/or cancer-directed surgery	None	Alive or dead of other cause	Alive or dead due to cancer	113	Alive	One primary only	July	No/Unknown
4502582	2004	Male	58	Asian or Pacific Islander	Married (including common law)	Hepatic Flexure	8140/3: Adenocarcinoma, NOS	C18.3-Hepatic flexure of colon	Moderately differentiated; Grade II	Blank(s)	IIIB	Blank(s)	Blank(s)	T3	Blank(s)	Blank(s)	N1	40	4 or more regional lymph nodes removed	Blank(s)	Blank(s)	30	450	3	100	3	11	1	10	No radiation and/or cancer-directed surgery	None	Alive or dead of other cause	Alive or dead due to cancer	111	Alive	One primary only	September	Yes
4502585	2004	Male	73	Black	Married (including common law)	Transverse Colon	8140/3: Adenocarcinoma, NOS	C18.4-Transverse colon	Moderately differentiated; Grade II	Blank(s)	IIIC	Blank(s)	Blank(s)	T3	Blank(s)	Blank(s)	N2	30	4 or more regional lymph nodes removed	Blank(s)	Blank(s)	40	400	3	100	3	17	13	20	No radiation and/or cancer-directed surgery	None	Alive or dead of other cause	Alive or dead due to cancer	112	Alive	One primary only	August	Yes
4502937	2004	Male	46	White	Single (never married)	Cecum	8140/3: Adenocarcinoma, NOS	C18.0-Cecum	Moderately differentiated; Grade II	Blank(s)	IIB	Blank(s)	Blank(s)	T4	Blank(s)	Blank(s)	N0	40	4 or more regional lymph nodes removed	Blank(s)	Blank(s)	70	600	3	0	3	8	0	999	No radiation and/or cancer-directed surgery	None	Dead (attributable to this cancer dx)	Alive or dead due to cancer	15	Colon excluding Rectum	One primary only	November	No/Unknown
4502945	2004	Female	75	White	Married (including common law)	Splenic Flexure	8140/3: Adenocarcinoma, NOS	C18.5-Splenic flexure of colon	Moderately differentiated; Grade II	Blank(s)	IIA	Blank(s)	Blank(s)	T3	Blank(s)	Blank(s)	N0	40	4 or more regional lymph nodes removed	Blank(s)	Blank(s)	45	400	3	0	3	24	0	999	No radiation and/or cancer-directed surgery	None	Alive or dead of other cause	Alive or dead due to cancer	109	Alive	One primary only	November	No/Unknown
4502948	2004	Female	51	Asian or Pacific Islander	Single (never married)	Splenic Flexure	8140/3: Adenocarcinoma, NOS	C18.5-Splenic flexure of colon	Moderately differentiated; Grade II	Blank(s)	IIA	Blank(s)	Blank(s)	T3	Blank(s)	Blank(s)	N0	30	4 or more regional lymph nodes removed	Blank(s)	Blank(s)	35	400	3	0	3	7	0	20	No radiation and/or cancer-directed surgery	None	Alive or dead of other cause	Alive or dead due to cancer	110	Alive	One primary only	October	No/Unknown
4502953	2004	Male	64	Asian or Pacific Islander	Married (including common law)	Sigmoid Colon	8140/3: Adenocarcinoma, NOS	C18.7-Sigmoid colon	Well differentiated; Grade I	Blank(s)	IIA	Blank(s)	Blank(s)	T3	Blank(s)	Blank(s)	N0	30	4 or more regional lymph nodes removed	Blank(s)	Blank(s)	50	400	3	0	3	19	0	999	No radiation and/or cancer-directed surgery	None	Alive or dead of other cause	Alive or dead due to cancer	109	Alive	One primary only	November	No/Unknown
4502955	2004	Male	75	Asian or Pacific Islander	Married (including common law)	Sigmoid Colon	8480/3: Mucinous adenocarcinoma	C18.7-Sigmoid colon	Poorly differentiated; Grade III	Blank(s)	IIIC	Blank(s)	Blank(s)	T3	Blank(s)	Blank(s)	N2	30	4 or more regional lymph nodes removed	Blank(s)	Blank(s)	45	400	3	100	3	21	15	999	No radiation and/or cancer-directed surgery	None	Dead (attributable to this cancer dx)	Alive or dead due to cancer	33	Colon excluding Rectum	One primary only	December	Yes
4502956	2004	Female	80	Asian or Pacific Islander	Single (never married)	Sigmoid Colon	8140/3: Adenocarcinoma, NOS	C18.7-Sigmoid colon	Moderately differentiated; Grade II	Blank(s)	IIA	Blank(s)	Blank(s)	T3	Blank(s)	Blank(s)	N0	40	4 or more regional lymph nodes removed	Blank(s)	Blank(s)	40	400	3	0	0	13	0	999	No radiation and/or cancer-directed surgery	None	Alive or dead of other cause	Dead (attributable to causes other than this cancer dx)	90	Hypertension without Heart Disease	One primary only	December	No/Unknown
4502960	2004	Male	56	Asian or Pacific Islander	Married (including common law)	Sigmoid Colon	8140/3: Adenocarcinoma, NOS	C18.7-Sigmoid colon	Moderately differentiated; Grade II	Blank(s)	IIA	Blank(s)	Blank(s)	T3	Blank(s)	Blank(s)	N0	30	4 or more regional lymph nodes removed	Blank(s)	Blank(s)	25	400	3	0	3	6	0	10	No radiation and/or cancer-directed surgery	None	Alive or dead of other cause	Alive or dead due to cancer	109	Alive	One primary only	November	No/Unknown
4502965	2004	Female	41	White	Married (including common law)	Rectum	8140/3: Adenocarcinoma, NOS	C20.9-Rectum, NOS	Moderately differentiated; Grade II	Blank(s)	IIIB	Blank(s)	Blank(s)	T3	Blank(s)	Blank(s)	N1	30	4 or more regional lymph nodes removed	Blank(s)	Blank(s)	45	450	3	300	3	11	2	10	Radiation after surgery	Beam radiation	Alive or dead of other cause	Alive or dead due to cancer	115	Alive	One primary only	May	Yes
4502968	2004	Female	76	White	Married (including common law)	Rectum	8140/3: Adenocarcinoma, NOS	C20.9-Rectum, NOS	Moderately differentiated; Grade II	Blank(s)	IIIB	Blank(s)	Blank(s)	T3	Blank(s)	Blank(s)	N1	30	4 or more regional lymph nodes removed	Blank(s)	Blank(s)	40	400	3	100	3	7	2	10	Radiation after surgery	Beam radiation	Dead (attributable to this cancer dx)	Alive or dead due to cancer	48	Rectum and Rectosigmoid Junction	One primary only	December	Yes
4502984	2004	Female	77	White	Single (never married)	Splenic Flexure	8140/3: Adenocarcinoma, NOS	C18.5-Splenic flexure of colon	Moderately differentiated; Grade II	Blank(s)	I	Blank(s)	Blank(s)	T2	Blank(s)	Blank(s)	N0	30	4 or more regional lymph nodes removed	Blank(s)	Blank(s)	35	200	3	0	3	4	0	20	No radiation and/or cancer-directed surgery	None	Alive or dead of other cause	Dead (attributable to causes other than this cancer dx)	8	Cerebrovascular Diseases	One primary only	November	No/Unknown
4502993	2004	Male	73	Asian or Pacific Islander	Married (including common law)	Sigmoid Colon	8140/3: Adenocarcinoma, NOS	C18.7-Sigmoid colon	Moderately differentiated; Grade II	Blank(s)	IIIB	Blank(s)	Blank(s)	T3	Blank(s)	Blank(s)	N1	50	4 or more regional lymph nodes removed	Blank(s)	Blank(s)	23	450	3	300	3	6	1	20	No radiation and/or cancer-directed surgery	None	Alive or dead of other cause	Alive or dead due to cancer	110	Alive	One primary only	October	No/Unknown
4503051	2004	Male	73	White	Married (including common law)	Rectum	8140/3: Adenocarcinoma, NOS	C20.9-Rectum, NOS	Moderately differentiated; Grade II	Blank(s)	IIIC	Blank(s)	Blank(s)	T4	Blank(s)	Blank(s)	N2	30	4 or more regional lymph nodes removed	Blank(s)	Blank(s)	35	610	3	300	3	43	14	998	No radiation and/or cancer-directed surgery	None	Dead (attributable to this cancer dx)	Alive or dead due to cancer	32	Colon excluding Rectum	One primary only	September	Yes
4503078	2004	Male	44	White	Single (never married)	Hepatic Flexure	8140/3: Adenocarcinoma, NOS	C18.3-Hepatic flexure of colon	Moderately differentiated; Grade II	Blank(s)	I	Blank(s)	Blank(s)	T2	Blank(s)	Blank(s)	N0	40	4 or more regional lymph nodes removed	Blank(s)	Blank(s)	45	200	3	0	3	36	0	20	No radiation and/or cancer-directed surgery	None	Alive or dead of other cause	Alive or dead due to cancer	114	Alive	One primary only	June	No/Unknown
4503089	2004	Female	77	Asian or Pacific Islander	Widowed	Sigmoid Colon	8140/3: Adenocarcinoma, NOS	C18.7-Sigmoid colon	Moderately differentiated; Grade II	Blank(s)	IIIB	Blank(s)	Blank(s)	T3	Blank(s)	Blank(s)	N1	30	4 or more regional lymph nodes removed	Blank(s)	Blank(s)	20	450	3	300	3	6	2	20	No radiation and/or cancer-directed surgery	None	Alive or dead of other cause	Alive or dead due to cancer	111	Alive	One primary only	September	No/Unknown
4503380	2004	Female	75	White	Single (never married)	Rectosigmoid Junction	8140/3: Adenocarcinoma, NOS	C19.9-Rectosigmoid junction	Moderately differentiated; Grade II	Blank(s)	IIIB	Blank(s)	Blank(s)	T3	Blank(s)	Blank(s)	N1	30	4 or more regional lymph nodes removed	Blank(s)	Blank(s)	40	450	3	200	3	8	1	10	Radiation after surgery	Beam radiation	Alive or dead of other cause	Alive or dead due to cancer	110	Alive	One primary only	October	Yes
4503446	2004	Male	57	White	Married (including common law)	Rectum	8480/3: Mucinous adenocarcinoma	C20.9-Rectum, NOS	Moderately differentiated; Grade II	Blank(s)	IIIB	Blank(s)	Blank(s)	T3	Blank(s)	Blank(s)	N1	30	4 or more regional lymph nodes removed	Blank(s)	Blank(s)	999	450	6	100	3	11	2	20	Radiation prior to surgery	Beam radiation	Dead (attributable to this cancer dx)	Alive or dead due to cancer	26	Rectum and Rectosigmoid Junction	One primary only	February	Yes
4503496	2004	Female	64	Asian or Pacific Islander	Widowed	Rectosigmoid Junction	8140/3: Adenocarcinoma, NOS	C19.9-Rectosigmoid junction	Poorly differentiated; Grade III	Blank(s)	IIB	Blank(s)	Blank(s)	T4	Blank(s)	Blank(s)	N0	30	4 or more regional lymph nodes removed	Blank(s)	Blank(s)	999	700	3	0	3	17	0	20	Radiation after surgery	Beam radiation	Dead (attributable to this cancer dx)	Alive or dead due to cancer	60	Colon excluding Rectum	One primary only	April	No/Unknown
4503714	2004	Male	66	Asian or Pacific Islander	Widowed	Cecum	8140/3: Adenocarcinoma, NOS	C18.0-Cecum	Moderately differentiated; Grade II	Blank(s)	IIA	Blank(s)	Blank(s)	T3	Blank(s)	Blank(s)	N0	40	4 or more regional lymph nodes removed	Blank(s)	Blank(s)	43	400	3	0	3	6	0	999	No radiation and/or cancer-directed surgery	None	Alive or dead of other cause	Alive or dead due to cancer	108	Alive	One primary only	December	Yes
4503728	2004	Female	61	Black	Married (including common law)	Rectum	8140/3: Adenocarcinoma, NOS	C20.9-Rectum, NOS	Moderately differentiated; Grade II	Blank(s)	I	Blank(s)	Blank(s)	T2	Blank(s)	Blank(s)	N0	30	4 or more regional lymph nodes removed	Blank(s)	Blank(s)	45	200	3	0	3	16	0	10	No radiation and/or cancer-directed surgery	None	Alive or dead of other cause	Alive or dead due to cancer	110	Alive	One primary only	October	No/Unknown
4503758	2004	Female	58	White	Single (never married)	Cecum	8140/3: Adenocarcinoma, NOS	C18.0-Cecum	Moderately differentiated; Grade II	Blank(s)	IIIB	Blank(s)	Blank(s)	T3	Blank(s)	Blank(s)	N1	40	4 or more regional lymph nodes removed	Blank(s)	Blank(s)	30	450	3	100	3	11	3	999	No radiation and/or cancer-directed surgery	None	Alive or dead of other cause	Alive or dead due to cancer	117	Alive	One primary only	March	No/Unknown
4503776	2004	Male	67	White	Married (including common law)	Cecum	8140/3: Adenocarcinoma, NOS	C18.0-Cecum	Moderately differentiated; Grade II	Blank(s)	IIIB	Blank(s)	Blank(s)	T3	Blank(s)	Blank(s)	N1	40	1 to 3 regional lymph nodes removed	Blank(s)	Blank(s)	75	458	3	200	3	8	3	20	No radiation and/or cancer-directed surgery	None	Alive or dead of other cause	Alive or dead due to cancer	111	Alive	One primary only	September	Yes
4503781	2004	Female	57	White	Widowed	Ascending Colon	8140/3: Adenocarcinoma, NOS	C18.2-Ascending colon	Poorly differentiated; Grade III	Blank(s)	IIA	Blank(s)	Blank(s)	T3	Blank(s)	Blank(s)	N0	40	4 or more regional lymph nodes removed	Blank(s)	Blank(s)	45	400	3	0	3	19	0	20	No radiation and/or cancer-directed surgery	None	Alive or dead of other cause	Alive or dead due to cancer	116	Alive	One primary only	April	No/Unknown
4503796	2004	Female	74	White	Single (never married)	Sigmoid Colon	8140/3: Adenocarcinoma, NOS	C18.7-Sigmoid colon	Moderately differentiated; Grade II	Blank(s)	IIIA	Blank(s)	Blank(s)	T2	Blank(s)	Blank(s)	N1	30	4 or more regional lymph nodes removed	Blank(s)	Blank(s)	40	200	3	100	3	32	1	998	No radiation and/or cancer-directed surgery	None	Alive or dead of other cause	Alive or dead due to cancer	108	Alive	One primary only	December	Yes
4503797	2004	Female	42	White	Married (including common law)	Rectosigmoid Junction	8140/3: Adenocarcinoma, NOS	C19.9-Rectosigmoid junction	Poorly differentiated; Grade III	Blank(s)	I	Blank(s)	Blank(s)	T2	Blank(s)	Blank(s)	N0	30	4 or more regional lymph nodes removed	Blank(s)	Blank(s)	30	200	3	0	3	6	0	10	No radiation and/or cancer-directed surgery	None	Alive or dead of other cause	Alive or dead due to cancer	110	Alive	One primary only	October	Yes
4503923	2004	Male	52	White	Single (never married)	Rectosigmoid Junction	8140/3: Adenocarcinoma, NOS	C19.9-Rectosigmoid junction	Poorly differentiated; Grade III	Blank(s)	IIB	Blank(s)	Blank(s)	T4	Blank(s)	Blank(s)	N0	30	None	Blank(s)	Blank(s)	25	550	3	0	1	1	0	20	No radiation and/or cancer-directed surgery	None	Dead (attributable to this cancer dx)	Alive or dead due to cancer	84	Rectum and Rectosigmoid Junction	One primary only	November	No/Unknown
4503941	2004	Female	78	White	Widowed	Ascending Colon	8140/3: Adenocarcinoma, NOS	C18.2-Ascending colon	Moderately differentiated; Grade II	Blank(s)	IIA	Blank(s)	Blank(s)	T3	Blank(s)	Blank(s)	N0	30	1 to 3 regional lymph nodes removed	Blank(s)	Blank(s)	35	450	3	0	3	2	0	20	No radiation and/or cancer-directed surgery	None	Alive or dead of other cause	Alive or dead due to cancer	108	Alive	One primary only	December	No/Unknown
4504001	2004	Male	67	Asian or Pacific Islander	Married (including common law)	Sigmoid Colon	8140/3: Adenocarcinoma, NOS	C18.7-Sigmoid colon	Moderately differentiated; Grade II	Blank(s)	I	Blank(s)	Blank(s)	T1	Blank(s)	Blank(s)	N0	30	4 or more regional lymph nodes removed	Blank(s)	Blank(s)	999	300	3	0	3	4	0	999	No radiation and/or cancer-directed surgery	None	Alive or dead of other cause	Alive or dead due to cancer	112	Alive	One primary only	August	No/Unknown
4504015	2004	Female	58	Asian or Pacific Islander	Married (including common law)	Rectosigmoid Junction	8140/3: Adenocarcinoma, NOS	C19.9-Rectosigmoid junction	Moderately differentiated; Grade II	Blank(s)	I	Blank(s)	Blank(s)	T2	Blank(s)	Blank(s)	N0	30	Number of regional lymph nodes removed unknown	Blank(s)	Blank(s)	50	200	3	0	0	98	0	20	No radiation and/or cancer-directed surgery	None	Alive or dead of other cause	Alive or dead due to cancer	111	Alive	One primary only	September	No/Unknown
4504044	2004	Male	59	White	Married (including common law)	Rectum	8140/3: Adenocarcinoma, NOS	C20.9-Rectum, NOS	Moderately differentiated; Grade II	Blank(s)	I	Blank(s)	Blank(s)	T1	Blank(s)	Blank(s)	N0	30	4 or more regional lymph nodes removed	Blank(s)	Blank(s)	30	300	0	0	0	4	0	10	Radiation before and after surgery	Beam radiation	Alive or dead of other cause	Alive or dead due to cancer	109	Alive	One primary only	November	Yes
4504506	2004	Female	71	White	Married (including common law)	Transverse Colon	8140/3: Adenocarcinoma, NOS	C18.4-Transverse colon	Poorly differentiated; Grade III	Blank(s)	IIIB	Blank(s)	Blank(s)	T3	Blank(s)	Blank(s)	N1	32	4 or more regional lymph nodes removed	Blank(s)	Blank(s)	65	460	3	100	3	11	1	20	No radiation and/or cancer-directed surgery	None	Alive or dead of other cause	Alive or dead due to cancer	111	Alive	One primary only	September	Yes
4504524	2004	Male	62	White	Married (including common law)	Sigmoid Colon	8140/3: Adenocarcinoma, NOS	C18.7-Sigmoid colon	Moderately differentiated; Grade II	Blank(s)	IIB	Blank(s)	Blank(s)	T4	Blank(s)	Blank(s)	N0	32	4 or more regional lymph nodes removed	Blank(s)	Blank(s)	100	750	3	0	3	10	0	20	Radiation after surgery	Beam radiation	Alive or dead of other cause	Dead (attributable to causes other than this cancer dx)	27	Chronic Obstructive Pulmonary Disease and Allied Cond	One primary only	October	Yes
4504530	2004	Female	56	Asian or Pacific Islander	Married (including common law)	Ascending Colon	8140/3: Adenocarcinoma, NOS	C18.2-Ascending colon	Moderately differentiated; Grade II	Blank(s)	IIA	Blank(s)	Blank(s)	T3	Blank(s)	Blank(s)	N0	40	4 or more regional lymph nodes removed	Blank(s)	Blank(s)	50	400	3	0	3	7	0	998	No radiation and/or cancer-directed surgery	None	Alive or dead of other cause	Alive or dead due to cancer	109	Alive	One primary only	November	No/Unknown
4504757	2004	Male	74	White	Divorced	Rectum	8140/3: Adenocarcinoma, NOS	C20.9-Rectum, NOS	Moderately differentiated; Grade II	Blank(s)	IIIB	Blank(s)	Blank(s)	T3	Blank(s)	Blank(s)	N1	30	4 or more regional lymph nodes removed	Blank(s)	Blank(s)	40	400	6	300	6	7	1	998	Radiation prior to surgery	Beam radiation	Alive or dead of other cause	Dead (attributable to causes other than this cancer dx)	37	Diseases of Heart	One primary only	October	Yes
4504891	2004	Male	48	Asian or Pacific Islander	Married (including common law)	Descending Colon	8140/3: Adenocarcinoma, NOS	C18.6-Descending colon	Moderately differentiated; Grade II	Blank(s)	IIIB	Blank(s)	Blank(s)	T3	Blank(s)	Blank(s)	N1	40	4 or more regional lymph nodes removed	Blank(s)	Blank(s)	70	450	3	100	3	7	1	20	No radiation and/or cancer-directed surgery	None	Alive or dead of other cause	Alive or dead due to cancer	110	Alive	One primary only	October	Yes
4505026	2004	Female	45	White	Married (including common law)	Sigmoid Colon	8480/3: Mucinous adenocarcinoma	C18.7-Sigmoid colon	Moderately differentiated; Grade II	Blank(s)	IIA	Blank(s)	Blank(s)	T3	Blank(s)	Blank(s)	N0	30	1 to 3 regional lymph nodes removed	Blank(s)	Blank(s)	35	400	3	0	3	2	0	999	No radiation and/or cancer-directed surgery	None	Alive or dead of other cause	Alive or dead due to cancer	109	Alive	One primary only	November	No/Unknown
4505045	2004	Female	74	Asian or Pacific Islander	Married (including common law)	Ascending Colon	8140/3: Adenocarcinoma, NOS	C18.2-Ascending colon	Poorly differentiated; Grade III	Blank(s)	IIIA	Blank(s)	Blank(s)	T1	Blank(s)	Blank(s)	N1	40	4 or more regional lymph nodes removed	Blank(s)	Blank(s)	25	160	3	300	3	14	1	998	No radiation and/or cancer-directed surgery	None	Alive or dead of other cause	Alive or dead due to cancer	111	Alive	One primary only	September	Yes
4505109	2004	Female	62	White	Divorced	Sigmoid Colon	8140/3: Adenocarcinoma, NOS	C18.7-Sigmoid colon	Moderately differentiated; Grade II	Blank(s)	I	Blank(s)	Blank(s)	T1	Blank(s)	Blank(s)	N0	40	4 or more regional lymph nodes removed	Blank(s)	Blank(s)	30	160	3	0	3	18	0	20	No radiation and/or cancer-directed surgery	None	Alive or dead of other cause	Alive or dead due to cancer	108	Alive	One primary only	December	No/Unknown
4505255	2004	Male	62	White	Married (including common law)	Sigmoid Colon	8140/3: Adenocarcinoma, NOS	C18.7-Sigmoid colon	Well differentiated; Grade I	Blank(s)	I	Blank(s)	Blank(s)	T2	Blank(s)	Blank(s)	N0	30	4 or more regional lymph nodes removed	Blank(s)	Blank(s)	50	200	3	0	3	5	0	999	No radiation and/or cancer-directed surgery	None	Alive or dead of other cause	Alive or dead due to cancer	114	Alive	One primary only	June	No/Unknown
4505276	2004	Male	74	White	Single (never married)	Cecum	8140/3: Adenocarcinoma, NOS	C18.0-Cecum	Moderately differentiated; Grade II	Blank(s)	IIA	Blank(s)	Blank(s)	T3	Blank(s)	Blank(s)	N0	40	1 to 3 regional lymph nodes removed	Blank(s)	Blank(s)	30	450	3	0	3	3	0	20	No radiation and/or cancer-directed surgery	None	Alive or dead of other cause	Dead (attributable to causes other than this cancer dx)	32	Other Cause of Death	One primary only	August	No/Unknown
4505280	2004	Male	58	Black	Married (including common law)	Rectum	8140/3: Adenocarcinoma, NOS	C20.9-Rectum, NOS	Moderately differentiated; Grade II	Blank(s)	IIA	Blank(s)	Blank(s)	T3	Blank(s)	Blank(s)	N0	30	4 or more regional lymph nodes removed	Blank(s)	Blank(s)	120	400	3	0	3	22	0	998	No radiation and/or cancer-directed surgery	None	Dead (attributable to this cancer dx)	Alive or dead due to cancer	103	Colon excluding Rectum	One primary only	July	No/Unknown
4505379	2004	Female	73	White	Married (including common law)	Sigmoid Colon	8140/3: Adenocarcinoma, NOS	C18.7-Sigmoid colon	Moderately differentiated; Grade II	Blank(s)	IIA	Blank(s)	Blank(s)	T3	Blank(s)	Blank(s)	N0	30	4 or more regional lymph nodes removed	Blank(s)	Blank(s)	999	400	3	0	3	8	0	999	No radiation and/or cancer-directed surgery	None	Alive or dead of other cause	Dead (attributable to causes other than this cancer dx)	60	Accidents and Adverse Effects	One primary only	October	No/Unknown
4505389	2004	Male	47	White	Married (including common law)	Rectum	8140/3: Adenocarcinoma, NOS	C20.9-Rectum, NOS	Moderately differentiated; Grade II	Blank(s)	IIIB	Blank(s)	Blank(s)	T3	Blank(s)	Blank(s)	N1	50	4 or more regional lymph nodes removed	Blank(s)	Blank(s)	999	400	1	100	1	6	2	10	Radiation prior to surgery	Beam radiation	Dead (attributable to this cancer dx)	Alive or dead due to cancer	30	Rectum and Rectosigmoid Junction	One primary only	November	Yes
4505652	2004	Male	49	White	Married (including common law)	Rectum	8140/3: Adenocarcinoma, NOS	C20.9-Rectum, NOS	Moderately differentiated; Grade II	Blank(s)	IIIA	Blank(s)	Blank(s)	T1	Blank(s)	Blank(s)	N1	30	4 or more regional lymph nodes removed	Blank(s)	Blank(s)	40	300	3	200	0	9	0	20	Radiation prior to surgery	Beam radiation	Alive or dead of other cause	Alive or dead due to cancer	108	Alive	One primary only	December	Yes
4505671	2004	Female	41	White	Single (never married)	Rectosigmoid Junction	8140/3: Adenocarcinoma, NOS	C19.9-Rectosigmoid junction	Poorly differentiated; Grade III	Blank(s)	IIIC	Blank(s)	Blank(s)	T4	Blank(s)	Blank(s)	N2	30	4 or more regional lymph nodes removed	Blank(s)	Blank(s)	55	550	3	300	3	19	4	999	Radiation after surgery	Beam radiation	Dead (attributable to this cancer dx)	Alive or dead due to cancer	17	Rectum and Rectosigmoid Junction	One primary only	September	Yes
4505768	2004	Male	80	White	Married (including common law)	Sigmoid Colon	8140/3: Adenocarcinoma, NOS	C18.7-Sigmoid colon	Well differentiated; Grade I	Blank(s)	I	Blank(s)	Blank(s)	T2	Blank(s)	Blank(s)	N0	80	4 or more regional lymph nodes removed	Blank(s)	Blank(s)	31	200	3	0	3	14	0	10	No radiation and/or cancer-directed surgery	None	Alive or dead of other cause	Dead (attributable to causes other than this cancer dx)	107	Diseases of Heart	One primary only	December	No/Unknown
4505770	2004	Male	77	Asian or Pacific Islander	Married (including common law)	Rectum	8140/3: Adenocarcinoma, NOS	C20.9-Rectum, NOS	Well differentiated; Grade I	Blank(s)	IIA	Blank(s)	Blank(s)	T3	Blank(s)	Blank(s)	N0	50	4 or more regional lymph nodes removed	Blank(s)	Blank(s)	30	400	3	0	3	7	0	10	Radiation prior to surgery	Beam radiation	Alive or dead of other cause	Dead (attributable to causes other than this cancer dx)	32	State DC not available or state DC available but no COD	One primary only	November	Yes
4505855	2004	Male	76	White	Married (including common law)	Rectosigmoid Junction	8140/3: Adenocarcinoma, NOS	C19.9-Rectosigmoid junction	Moderately differentiated; Grade II	Blank(s)	IIIB	Blank(s)	Blank(s)	T3	Blank(s)	Blank(s)	N1	30	4 or more regional lymph nodes removed	Blank(s)	Blank(s)	28	450	3	100	3	9	2	20	No radiation and/or cancer-directed surgery	None	Dead (attributable to this cancer dx)	Alive or dead due to cancer	1	Rectum and Rectosigmoid Junction	One primary only	December	No/Unknown
4505927	2004	Female	73	White	Divorced	Ascending Colon	8140/3: Adenocarcinoma, NOS	C18.2-Ascending colon	Moderately differentiated; Grade II	Blank(s)	I	Blank(s)	Blank(s)	T2	Blank(s)	Blank(s)	N0	40	4 or more regional lymph nodes removed	Blank(s)	Blank(s)	46	200	3	0	3	24	0	998	No radiation and/or cancer-directed surgery	None	Dead (attributable to this cancer dx)	Alive or dead due to cancer	1	Colon excluding Rectum	One primary only	May	No/Unknown
4505931	2004	Female	69	White	Married (including common law)	Hepatic Flexure	8140/3: Adenocarcinoma, NOS	C18.3-Hepatic flexure of colon	Moderately differentiated; Grade II	Blank(s)	IIIC	Blank(s)	Blank(s)	T3	Blank(s)	Blank(s)	N2	40	4 or more regional lymph nodes removed	Blank(s)	Blank(s)	74	400	3	100	3	32	4	998	No radiation and/or cancer-directed surgery	None	Dead (attributable to this cancer dx)	Alive or dead due to cancer	30	Colon excluding Rectum	One primary only	December	Yes
4505942	2004	Male	68	Black	Single (never married)	Rectosigmoid Junction	8140/3: Adenocarcinoma, NOS	C19.9-Rectosigmoid junction	Moderately differentiated; Grade II	Blank(s)	IIIC	Blank(s)	Blank(s)	T3	Blank(s)	Blank(s)	N2	30	4 or more regional lymph nodes removed	Blank(s)	Blank(s)	32	400	3	100	3	26	5	998	No radiation and/or cancer-directed surgery	None	Alive or dead of other cause	Dead (attributable to causes other than this cancer dx)	3	Hypertension without Heart Disease	One primary only	November	No/Unknown
4505943	2004	Female	57	White	Single (never married)	Rectosigmoid Junction	8140/3: Adenocarcinoma, NOS	C19.9-Rectosigmoid junction	Moderately differentiated; Grade II	Blank(s)	IIIB	Blank(s)	Blank(s)	T3	Blank(s)	Blank(s)	N1	30	4 or more regional lymph nodes removed	Blank(s)	Blank(s)	62	400	3	100	3	23	1	998	No radiation and/or cancer-directed surgery	None	Alive or dead of other cause	Alive or dead due to cancer	110	Alive	One primary only	October	Yes
4506094	2004	Male	75	Black	Single (never married)	Ascending Colon	8140/3: Adenocarcinoma, NOS	C18.2-Ascending colon	Well differentiated; Grade I	Blank(s)	I	Blank(s)	Blank(s)	T1	Blank(s)	Blank(s)	N0	40	4 or more regional lymph nodes removed	Blank(s)	Blank(s)	999	160	3	0	3	5	0	998	No radiation and/or cancer-directed surgery	None	Alive or dead of other cause	Dead (attributable to causes other than this cancer dx)	61	Diseases of Heart	One primary only	December	No/Unknown
4506111	2004	Male	46	Black	Single (never married)	Splenic Flexure	8480/3: Mucinous adenocarcinoma	C18.5-Splenic flexure of colon	Moderately differentiated; Grade II	Blank(s)	IIIB	Blank(s)	Blank(s)	T3	Blank(s)	Blank(s)	N1	40	4 or more regional lymph nodes removed	Blank(s)	Blank(s)	45	400	3	100	3	34	1	998	No radiation and/or cancer-directed surgery	None	Dead (attributable to this cancer dx)	Alive or dead due to cancer	44	Colon excluding Rectum	One primary only	July	No/Unknown
4506112	2004	Male	73	Black	Unknown	Sigmoid Colon	8140/3: Adenocarcinoma, NOS	C18.7-Sigmoid colon	Moderately differentiated; Grade II	Blank(s)	IIA	Blank(s)	Blank(s)	T3	Blank(s)	Blank(s)	N0	30	4 or more regional lymph nodes removed	Blank(s)	Blank(s)	55	400	3	0	3	21	0	998	No radiation and/or cancer-directed surgery	None	Dead (attributable to this cancer dx)	Alive or dead due to cancer	46	Colon excluding Rectum	One primary only	December	No/Unknown
4506115	2004	Female	58	White	Married (including common law)	Sigmoid Colon	8140/3: Adenocarcinoma, NOS	C18.7-Sigmoid colon	Moderately differentiated; Grade II	Blank(s)	I	Blank(s)	Blank(s)	T2	Blank(s)	Blank(s)	N0	30	None	Blank(s)	Blank(s)	26	200	3	0	0	13	0	998	No radiation and/or cancer-directed surgery	None	Alive or dead of other cause	Alive or dead due to cancer	110	Alive	One primary only	October	No/Unknown
4506121	2004	Male	55	Asian or Pacific Islander	Single (never married)	Rectosigmoid Junction	8140/3: Adenocarcinoma, NOS	C19.9-Rectosigmoid junction	Moderately differentiated; Grade II	Blank(s)	IIIB	Blank(s)	Blank(s)	T3	Blank(s)	Blank(s)	N1	30	4 or more regional lymph nodes removed	Blank(s)	Blank(s)	60	400	3	100	3	14	1	10	No radiation and/or cancer-directed surgery	None	Alive or dead of other cause	Alive or dead due to cancer	112	Alive	One primary only	August	No/Unknown
4506474	2004	Female	75	White	Single (never married)	Ascending Colon	8140/3: Adenocarcinoma, NOS	C18.2-Ascending colon	Moderately differentiated; Grade II	Blank(s)	IIA	Blank(s)	Blank(s)	T3	Blank(s)	Blank(s)	N0	30	4 or more regional lymph nodes removed	Blank(s)	Blank(s)	33	400	3	0	3	8	0	10	No radiation and/or cancer-directed surgery	None	Alive or dead of other cause	Dead (attributable to causes other than this cancer dx)	68	Diseases of Heart	One primary only	December	No/Unknown
4506480	2004	Male	39	Asian or Pacific Islander	Married (including common law)	Rectum	8140/3: Adenocarcinoma, NOS	C20.9-Rectum, NOS	Moderately differentiated; Grade II	Blank(s)	IIIC	Blank(s)	Blank(s)	T4	Blank(s)	Blank(s)	N2	60	4 or more regional lymph nodes removed	Blank(s)	Blank(s)	70	610	6	100	6	19	6	10	Radiation prior to surgery	Beam radiation	Alive or dead of other cause	Alive or dead due to cancer	109	Alive	One primary only	November	Yes
4506619	2004	Male	51	White	Married (including common law)	Rectum	8140/3: Adenocarcinoma, NOS	C20.9-Rectum, NOS	Moderately differentiated; Grade II	Blank(s)	IIA	Blank(s)	Blank(s)	T3	Blank(s)	Blank(s)	N0	30	4 or more regional lymph nodes removed	Blank(s)	Blank(s)	80	450	5	0	3	8	0	998	Radiation prior to surgery	Beam radiation	Dead (attributable to this cancer dx)	Alive or dead due to cancer	52	Colon excluding Rectum	One primary only	November	Yes
4507129	2004	Female	55	Asian or Pacific Islander	Married (including common law)	Rectum	8140/3: Adenocarcinoma, NOS	C20.9-Rectum, NOS	Moderately differentiated; Grade II	Blank(s)	I	Blank(s)	Blank(s)	T2	Blank(s)	Blank(s)	N0	30	4 or more regional lymph nodes removed	Blank(s)	Blank(s)	999	200	6	0	6	14	0	998	Radiation prior to surgery	Beam radiation	Alive or dead of other cause	Alive or dead due to cancer	109	Alive	One primary only	November	Yes
4507229	2004	Male	60	White	Married (including common law)	Splenic Flexure	8140/3: Adenocarcinoma, NOS	C18.5-Splenic flexure of colon	Moderately differentiated; Grade II	Blank(s)	I	Blank(s)	Blank(s)	T1	Blank(s)	Blank(s)	N0	30	4 or more regional lymph nodes removed	Blank(s)	Blank(s)	22	160	3	0	3	4	0	998	No radiation and/or cancer-directed surgery	None	Alive or dead of other cause	Alive or dead due to cancer	114	Alive	One primary only	June	No/Unknown
4507236	2004	Male	60	White	Married (including common law)	Rectum	8140/3: Adenocarcinoma, NOS	C20.9-Rectum, NOS	Moderately differentiated; Grade II	Blank(s)	IIA	Blank(s)	Blank(s)	T3	Blank(s)	Blank(s)	N0	30	1 to 3 regional lymph nodes removed	Blank(s)	Blank(s)	999	450	6	0	6	2	0	998	Radiation prior to surgery	Beam radiation	Alive or dead of other cause	Alive or dead due to cancer	4	Alive	One primary only	November	Yes
4507353	2004	Female	23	White	Married (including common law)	Rectosigmoid Junction	8490/3: Signet ring cell carcinoma	C19.9-Rectosigmoid junction	Poorly differentiated; Grade III	Blank(s)	IIB	Blank(s)	Blank(s)	T4	Blank(s)	Blank(s)	N0	70	4 or more regional lymph nodes removed	Blank(s)	Blank(s)	82	610	3	0	3	8	0	10	Radiation prior to surgery	Beam radiation	Dead (attributable to this cancer dx)	Alive or dead due to cancer	53	Rectum and Rectosigmoid Junction	One primary only	December	Yes
4507455	2004	Male	77	White	Widowed	Rectum	8140/3: Adenocarcinoma, NOS	C20.9-Rectum, NOS	Moderately differentiated; Grade II	Blank(s)	IIIB	Blank(s)	Blank(s)	T3	Blank(s)	Blank(s)	N1	30	4 or more regional lymph nodes removed	Blank(s)	Blank(s)	32	400	3	300	3	20	1	998	No radiation and/or cancer-directed surgery	None	Dead (attributable to this cancer dx)	Alive or dead due to cancer	33	Miscellaneous Malignant Cancer	One primary only	January	No/Unknown
4507562	2004	Female	79	White	Married (including common law)	Ascending Colon	8480/3: Mucinous adenocarcinoma	C18.2-Ascending colon	Moderately differentiated; Grade II	Blank(s)	IIA	Blank(s)	Blank(s)	T3	Blank(s)	Blank(s)	N0	40	4 or more regional lymph nodes removed	Blank(s)	Blank(s)	55	450	3	0	3	12	0	10	No radiation and/or cancer-directed surgery	None	Alive or dead of other cause	Dead (attributable to causes other than this cancer dx)	73	Hypertension without Heart Disease	One primary only	November	No/Unknown
4507585	2004	Female	46	White	Married (including common law)	Cecum	8480/3: Mucinous adenocarcinoma	C18.0-Cecum	Moderately differentiated; Grade II	Blank(s)	IIIC	Blank(s)	Blank(s)	T3	Blank(s)	Blank(s)	N2	40	4 or more regional lymph nodes removed	Blank(s)	Blank(s)	55	400	3	300	3	15	4	20	No radiation and/or cancer-directed surgery	None	Alive or dead of other cause	Alive or dead due to cancer	111	Alive	One primary only	September	Yes
4507593	2004	Male	73	White	Single (never married)	Hepatic Flexure	8140/3: Adenocarcinoma, NOS	C18.3-Hepatic flexure of colon	Moderately differentiated; Grade II	Blank(s)	I	Blank(s)	Blank(s)	T2	Blank(s)	Blank(s)	N0	40	4 or more regional lymph nodes removed	Blank(s)	Blank(s)	20	200	3	0	0	12	0	20	No radiation and/or cancer-directed surgery	None	Alive or dead of other cause	Alive or dead due to cancer	108	Alive	One primary only	December	No/Unknown
4507621	2004	Female	53	White	Married (including common law)	Rectum	8140/3: Adenocarcinoma, NOS	C20.9-Rectum, NOS	Moderately differentiated; Grade II	Blank(s)	IIA	Blank(s)	Blank(s)	T3	Blank(s)	Blank(s)	N0	30	4 or more regional lymph nodes removed	Blank(s)	Blank(s)	999	400	3	0	3	7	0	998	Radiation after surgery	Beam radiation	Dead (attributable to this cancer dx)	Alive or dead due to cancer	37	Rectum and Rectosigmoid Junction	One primary only	October	Yes
4507625	2004	Female	59	White	Divorced	Rectum	8140/3: Adenocarcinoma, NOS	C20.9-Rectum, NOS	Moderately differentiated; Grade II	Blank(s)	IIA	Blank(s)	Blank(s)	T3	Blank(s)	Blank(s)	N0	30	4 or more regional lymph nodes removed	Blank(s)	Blank(s)	40	450	5	0	5	6	0	20	Radiation prior to surgery	Beam radiation	Alive or dead of other cause	Alive or dead due to cancer	110	Alive	One primary only	October	Yes
4507735	2004	Male	38	Black	Separated	Sigmoid Colon	8140/3: Adenocarcinoma, NOS	C18.7-Sigmoid colon	Moderately differentiated; Grade II	Blank(s)	IIIB	Blank(s)	Blank(s)	T3	Blank(s)	Blank(s)	N1	30	4 or more regional lymph nodes removed	Blank(s)	Blank(s)	20	450	3	300	3	7	2	10	No radiation and/or cancer-directed surgery	None	Dead (attributable to this cancer dx)	Alive or dead due to cancer	20	Colon excluding Rectum	One primary only	September	No/Unknown
4507745	2004	Female	76	Asian or Pacific Islander	Married (including common law)	Sigmoid Colon	8140/3: Adenocarcinoma, NOS	C18.7-Sigmoid colon	Moderately differentiated; Grade II	Blank(s)	IIA	Blank(s)	Blank(s)	T3	Blank(s)	Blank(s)	N0	30	4 or more regional lymph nodes removed	Blank(s)	Blank(s)	40	450	3	0	3	13	0	10	No radiation and/or cancer-directed surgery	None	Dead (attributable to this cancer dx)	Alive or dead due to cancer	51	Colon excluding Rectum	One primary only	September	Yes
4507753	2004	Male	78	Black	Married (including common law)	Rectum	8140/3: Adenocarcinoma, NOS	C20.9-Rectum, NOS	Moderately differentiated; Grade II	Blank(s)	IIIC	Blank(s)	Blank(s)	T3	Blank(s)	Blank(s)	N2	50	4 or more regional lymph nodes removed	Blank(s)	Blank(s)	55	450	3	100	3	8	8	998	No radiation and/or cancer-directed surgery	None	Alive or dead of other cause	Dead (attributable to causes other than this cancer dx)	2	Diseases of Heart	One primary only	September	No/Unknown
4507838	2004	Male	78	White	Married (including common law)	Ascending Colon	8140/3: Adenocarcinoma, NOS	C18.2-Ascending colon	Poorly differentiated; Grade III	Blank(s)	IIA	Blank(s)	Blank(s)	T3	Blank(s)	Blank(s)	N0	40	4 or more regional lymph nodes removed	Blank(s)	Blank(s)	45	450	3	0	3	20	0	20	No radiation and/or cancer-directed surgery	None	Dead (attributable to this cancer dx)	Alive or dead due to cancer	49	Colon excluding Rectum	One primary only	April	No/Unknown
4507843	2004	Male	61	White	Single (never married)	Ascending Colon	8140/3: Adenocarcinoma, NOS	C18.2-Ascending colon	Moderately differentiated; Grade II	Blank(s)	IIIB	Blank(s)	Blank(s)	T4	Blank(s)	Blank(s)	N1	40	4 or more regional lymph nodes removed	Blank(s)	Blank(s)	45	550	3	300	3	7	2	10	No radiation and/or cancer-directed surgery	None	Alive or dead of other cause	Alive or dead due to cancer	116	Alive	One primary only	April	Yes
4507902	2004	Male	72	White	Married (including common law)	Cecum	8140/3: Adenocarcinoma, NOS	C18.0-Cecum	Moderately differentiated; Grade II	Blank(s)	IIA	Blank(s)	Blank(s)	T3	Blank(s)	Blank(s)	N0	40	4 or more regional lymph nodes removed	Blank(s)	Blank(s)	65	400	3	0	3	31	0	998	No radiation and/or cancer-directed surgery	None	Alive or dead of other cause	Alive or dead due to cancer	114	Alive	One primary only	June	No/Unknown
4507904	2004	Male	73	Black	Married (including common law)	Cecum	8140/3: Adenocarcinoma, NOS	C18.0-Cecum	Poorly differentiated; Grade III	Blank(s)	IIIB	Blank(s)	Blank(s)	T4	Blank(s)	Blank(s)	N1	40	4 or more regional lymph nodes removed	Blank(s)	Blank(s)	45	600	3	100	3	19	2	10	No radiation and/or cancer-directed surgery	None	Dead (attributable to this cancer dx)	Alive or dead due to cancer	6	Colon excluding Rectum	One primary only	May	No/Unknown
4507909	2004	Male	45	White	Married (including common law)	Sigmoid Colon	8140/3: Adenocarcinoma, NOS	C18.7-Sigmoid colon	Well differentiated; Grade I	Blank(s)	IIA	Blank(s)	Blank(s)	T3	Blank(s)	Blank(s)	N0	30	4 or more regional lymph nodes removed	Blank(s)	Blank(s)	35	400	3	0	3	7	0	999	No radiation and/or cancer-directed surgery	None	Alive or dead of other cause	Alive or dead due to cancer	109	Alive	One primary only	November	No/Unknown
4507948	2004	Male	51	White	Married (including common law)	Rectum	8140/3: Adenocarcinoma, NOS	C20.9-Rectum, NOS	Moderately differentiated; Grade II	Blank(s)	I	Blank(s)	Blank(s)	T1	Blank(s)	Blank(s)	N0	30	4 or more regional lymph nodes removed	Blank(s)	Blank(s)	12	160	3	0	3	8	0	998	No radiation and/or cancer-directed surgery	None	Alive or dead of other cause	Alive or dead due to cancer	108	Alive	One primary only	December	No/Unknown
4508334	2004	Male	52	White	Single (never married)	Rectum	8480/3: Mucinous adenocarcinoma	C20.9-Rectum, NOS	Poorly differentiated; Grade III	Blank(s)	IIIB	Blank(s)	Blank(s)	T3	Blank(s)	Blank(s)	N1	30	4 or more regional lymph nodes removed	Blank(s)	Blank(s)	30	450	3	100	3	9	3	20	Radiation after surgery	Beam radiation	Dead (attributable to this cancer dx)	Alive or dead due to cancer	63	Colon excluding Rectum	One primary only	December	Yes
4508395	2004	Male	76	White	Married (including common law)	Sigmoid Colon	8140/3: Adenocarcinoma, NOS	C18.7-Sigmoid colon	Moderately differentiated; Grade II	Blank(s)	I	Blank(s)	Blank(s)	T2	Blank(s)	Blank(s)	N0	40	4 or more regional lymph nodes removed	Blank(s)	Blank(s)	24	200	3	0	3	20	0	999	No radiation and/or cancer-directed surgery	None	Alive or dead of other cause	Alive or dead due to cancer	110	Alive	One primary only	October	No/Unknown
4508412	2004	Female	58	White	Unknown	Rectum	8140/3: Adenocarcinoma, NOS	C20.9-Rectum, NOS	Moderately differentiated; Grade II	Blank(s)	IIIB	Blank(s)	Blank(s)	T3	Blank(s)	Blank(s)	N1	50	4 or more regional lymph nodes removed	Blank(s)	Blank(s)	30	450	5	100	6	9	1	999	Radiation prior to surgery	Beam radiation	Alive or dead of other cause	Alive or dead due to cancer	111	Alive	One primary only	September	Yes
4508454	2004	Male	68	White	Married (including common law)	Cecum	8481/3: Mucin-producing adenocarcinoma	C18.0-Cecum	Poorly differentiated; Grade III	Blank(s)	IIA	Blank(s)	Blank(s)	T3	Blank(s)	Blank(s)	N0	40	4 or more regional lymph nodes removed	Blank(s)	Blank(s)	30	400	3	0	3	4	0	999	No radiation and/or cancer-directed surgery	None	Alive or dead of other cause	Alive or dead due to cancer	108	Alive	One primary only	December	No/Unknown
4508502	2004	Male	78	White	Married (including common law)	Transverse Colon	8140/3: Adenocarcinoma, NOS	C18.4-Transverse colon	Moderately differentiated; Grade II	Blank(s)	IIIB	Blank(s)	Blank(s)	T3	Blank(s)	Blank(s)	N1	30	4 or more regional lymph nodes removed	Blank(s)	Blank(s)	45	450	3	300	3	14	1	20	No radiation and/or cancer-directed surgery	None	Alive or dead of other cause	Dead (attributable to causes other than this cancer dx)	77	Cerebrovascular Diseases	One primary only	August	No/Unknown
4508505	2004	Male	80	White	Married (including common law)	Ascending Colon	8140/3: Adenocarcinoma, NOS	C18.2-Ascending colon	Moderately differentiated; Grade II	Blank(s)	I	Blank(s)	Blank(s)	T2	Blank(s)	Blank(s)	N0	40	4 or more regional lymph nodes removed	Blank(s)	Blank(s)	999	200	3	0	3	16	0	20	No radiation and/or cancer-directed surgery	None	Alive or dead of other cause	Alive or dead due to cancer	117	Alive	One primary only	March	No/Unknown
4508569	2004	Male	31	Asian or Pacific Islander	Married (including common law)	Cecum	8480/3: Mucinous adenocarcinoma	C18.0-Cecum	Moderately differentiated; Grade II	Blank(s)	IIIB	Blank(s)	Blank(s)	T3	Blank(s)	Blank(s)	N1	30	4 or more regional lymph nodes removed	Blank(s)	Blank(s)	999	400	3	100	3	25	1	20	No radiation and/or cancer-directed surgery	None	Alive or dead of other cause	Alive or dead due to cancer	109	Alive	One primary only	November	Yes
4508592	2004	Female	47	White	Married (including common law)	Transverse Colon	8140/3: Adenocarcinoma, NOS	C18.4-Transverse colon	Moderately differentiated; Grade II	Blank(s)	IIA	Blank(s)	Blank(s)	T3	Blank(s)	Blank(s)	N0	40	4 or more regional lymph nodes removed	Blank(s)	Blank(s)	40	400	3	0	3	23	0	20	No radiation and/or cancer-directed surgery	None	Alive or dead of other cause	Alive or dead due to cancer	109	Alive	One primary only	November	Yes
4508599	2004	Male	75	White	Widowed	Cecum	8140/3: Adenocarcinoma, NOS	C18.0-Cecum	Poorly differentiated; Grade III	Blank(s)	IIIC	Blank(s)	Blank(s)	T3	Blank(s)	Blank(s)	N2	30	4 or more regional lymph nodes removed	Blank(s)	Blank(s)	999	400	3	300	3	11	6	10	No radiation and/or cancer-directed surgery	None	Dead (attributable to this cancer dx)	Alive or dead due to cancer	9	Colon excluding Rectum	One primary only	July	Yes
4508628	2004	Female	37	White	Married (including common law)	Sigmoid Colon	8140/3: Adenocarcinoma, NOS	C18.7-Sigmoid colon	Moderately differentiated; Grade II	Blank(s)	I	Blank(s)	Blank(s)	T2	Blank(s)	Blank(s)	N0	30	4 or more regional lymph nodes removed	Blank(s)	Blank(s)	40	200	3	0	3	15	0	999	No radiation and/or cancer-directed surgery	None	Alive or dead of other cause	Alive or dead due to cancer	111	Alive	One primary only	September	No/Unknown
4508718	2004	Female	56	White	Widowed	Cecum	8480/3: Mucinous adenocarcinoma	C18.0-Cecum	Moderately differentiated; Grade II	Blank(s)	I	Blank(s)	Blank(s)	T2	Blank(s)	Blank(s)	N0	40	4 or more regional lymph nodes removed	Blank(s)	Blank(s)	40	200	3	0	3	11	0	999	No radiation and/or cancer-directed surgery	None	Alive or dead of other cause	Dead (attributable to causes other than this cancer dx)	40	Diseases of Heart	One primary only	September	No/Unknown
4508735	2004	Male	64	Black	Separated	Rectum	8140/3: Adenocarcinoma, NOS	C20.9-Rectum, NOS	Moderately differentiated; Grade II	Blank(s)	IIA	Blank(s)	Blank(s)	T3	Blank(s)	Blank(s)	N0	30	4 or more regional lymph nodes removed	Blank(s)	Blank(s)	100	450	6	0	6	7	0	999	Radiation prior to surgery	Beam radiation	Alive or dead of other cause	Alive or dead due to cancer	109	Alive	One primary only	November	Yes
4508770	2004	Female	64	Asian or Pacific Islander	Married (including common law)	Transverse Colon	8140/3: Adenocarcinoma, NOS	C18.4-Transverse colon	Moderately differentiated; Grade II	Blank(s)	I	Blank(s)	Blank(s)	T2	Blank(s)	Blank(s)	N0	30	4 or more regional lymph nodes removed	Blank(s)	Blank(s)	22	200	3	0	3	18	0	998	No radiation and/or cancer-directed surgery	None	Alive or dead of other cause	Alive or dead due to cancer	112	Alive	One primary only	August	No/Unknown
4508778	2004	Female	78	Asian or Pacific Islander	Widowed	Transverse Colon	8140/3: Adenocarcinoma, NOS	C18.4-Transverse colon	Poorly differentiated; Grade III	Blank(s)	IIIA	Blank(s)	Blank(s)	T2	Blank(s)	Blank(s)	N1	30	4 or more regional lymph nodes removed	Blank(s)	Blank(s)	20	200	3	100	3	10	3	998	No radiation and/or cancer-directed surgery	None	Dead (attributable to this cancer dx)	Alive or dead due to cancer	18	Colon excluding Rectum	One primary only	August	No/Unknown
4508790	2004	Female	48	Black	Separated	Cecum	8140/3: Adenocarcinoma, NOS	C18.0-Cecum	Moderately differentiated; Grade II	Blank(s)	IIIB	Blank(s)	Blank(s)	T3	Blank(s)	Blank(s)	N1	40	4 or more regional lymph nodes removed	Blank(s)	Blank(s)	53	400	3	100	3	19	3	998	No radiation and/or cancer-directed surgery	None	Alive or dead of other cause	Alive or dead due to cancer	112	Alive	One primary only	August	No/Unknown
4508830	2004	Male	78	Asian or Pacific Islander	Married (including common law)	Rectosigmoid Junction	8140/3: Adenocarcinoma, NOS	C19.9-Rectosigmoid junction	Moderately differentiated; Grade II	Blank(s)	IIA	Blank(s)	Blank(s)	T3	Blank(s)	Blank(s)	N0	30	4 or more regional lymph nodes removed	Blank(s)	Blank(s)	22	400	3	0	3	18	0	998	No radiation and/or cancer-directed surgery	None	Alive or dead of other cause	Dead (attributable to causes other than this cancer dx)	82	Diseases of Heart	One primary only	June	No/Unknown
4508838	2004	Male	41	White	Single (never married)	Rectosigmoid Junction	8140/3: Adenocarcinoma, NOS	C19.9-Rectosigmoid junction	Moderately differentiated; Grade II	Blank(s)	IIIC	Blank(s)	Blank(s)	T3	Blank(s)	Blank(s)	N2	30	4 or more regional lymph nodes removed	Blank(s)	Blank(s)	48	400	3	300	3	24	6	20	No radiation and/or cancer-directed surgery	None	Alive or dead of other cause	Alive or dead due to cancer	112	Alive	One primary only	August	Yes
4508841	2004	Male	58	White	Married (including common law)	Rectosigmoid Junction	8140/3: Adenocarcinoma, NOS	C19.9-Rectosigmoid junction	Moderately differentiated; Grade II	Blank(s)	I	Blank(s)	Blank(s)	T1	Blank(s)	Blank(s)	N0	30	4 or more regional lymph nodes removed	Blank(s)	Blank(s)	15	150	3	0	3	4	0	20	No radiation and/or cancer-directed surgery	None	Alive or dead of other cause	Alive or dead due to cancer	113	Alive	One primary only	July	No/Unknown
4508879	2004	Female	60	White	Married (including common law)	Appendix	8490/3: Signet ring cell carcinoma	C18.1-Appendix	Moderately differentiated; Grade II	Blank(s)	IIIB	Blank(s)	Blank(s)	T4	Blank(s)	Blank(s)	N1	40	4 or more regional lymph nodes removed	Blank(s)	Blank(s)	50	750	3	100	3	12	1	10	Radiation after surgery	Beam radiation	Dead (attributable to this cancer dx)	Alive or dead due to cancer	16	Colon excluding Rectum	One primary only	October	Yes
4508891	2004	Female	66	White	Single (never married)	Rectum	8140/3: Adenocarcinoma, NOS	C20.9-Rectum, NOS	Moderately differentiated; Grade II	Blank(s)	IIA	Blank(s)	Blank(s)	T3	Blank(s)	Blank(s)	N0	50	4 or more regional lymph nodes removed	Blank(s)	Blank(s)	25	450	6	0	6	11	0	20	Radiation prior to surgery	Beam radiation	Alive or dead of other cause	Alive or dead due to cancer	108	Alive	One primary only	December	Yes
4508982	2004	Male	49	Asian or Pacific Islander	Married (including common law)	Rectum	8140/3: Adenocarcinoma, NOS	C20.9-Rectum, NOS	Moderately differentiated; Grade II	Blank(s)	I	Blank(s)	Blank(s)	T1	Blank(s)	Blank(s)	N0	30	4 or more regional lymph nodes removed	Blank(s)	Blank(s)	999	300	6	0	6	7	0	999	Radiation prior to surgery	Beam radiation	Alive or dead of other cause	Alive or dead due to cancer	110	Alive	One primary only	October	Yes
4508983	2004	Female	42	Asian or Pacific Islander	Married (including common law)	Rectum	8140/3: Adenocarcinoma, NOS	C20.9-Rectum, NOS	Moderately differentiated; Grade II	Blank(s)	IIIC	Blank(s)	Blank(s)	T3	Blank(s)	Blank(s)	N2	30	4 or more regional lymph nodes removed	Blank(s)	Blank(s)	40	450	3	300	3	22	7	999	Radiation after surgery	Beam radiation	Dead (attributable to this cancer dx)	Alive or dead due to cancer	61	Rectum and Rectosigmoid Junction	One primary only	November	Yes
4509114	2004	Female	77	Asian or Pacific Islander	Single (never married)	Splenic Flexure	8140/3: Adenocarcinoma, NOS	C18.5-Splenic flexure of colon	Moderately differentiated; Grade II	Blank(s)	IIA	Blank(s)	Blank(s)	T3	Blank(s)	Blank(s)	N0	30	4 or more regional lymph nodes removed	Blank(s)	Blank(s)	25	400	3	0	3	11	0	20	No radiation and/or cancer-directed surgery	None	Alive or dead of other cause	Alive or dead due to cancer	110	Alive	One primary only	October	No/Unknown
4509123	2004	Male	69	White	Married (including common law)	Transverse Colon	8140/3: Adenocarcinoma, NOS	C18.4-Transverse colon	Moderately differentiated; Grade II	Blank(s)	IIA	Blank(s)	Blank(s)	T3	Blank(s)	Blank(s)	N0	40	4 or more regional lymph nodes removed	Blank(s)	Blank(s)	76	400	3	0	3	9	0	999	No radiation and/or cancer-directed surgery	None	Alive or dead of other cause	Dead (attributable to causes other than this cancer dx)	96	Diseases of Heart	One primary only	May	No/Unknown
4509126	2004	Female	56	White	Married (including common law)	Cecum	8140/3: Adenocarcinoma, NOS	C18.0-Cecum	Poorly differentiated; Grade III	Blank(s)	IIIB	Blank(s)	Blank(s)	T3	Blank(s)	Blank(s)	N1	40	4 or more regional lymph nodes removed	Blank(s)	Blank(s)	20	450	3	100	3	23	1	20	No radiation and/or cancer-directed surgery	None	Alive or dead of other cause	Alive or dead due to cancer	109	Alive	One primary only	November	Yes
4509131	2004	Female	78	White	Widowed	Descending Colon	8140/3: Adenocarcinoma, NOS	C18.6-Descending colon	Moderately differentiated; Grade II	Blank(s)	IIA	Blank(s)	Blank(s)	T3	Blank(s)	Blank(s)	N0	40	4 or more regional lymph nodes removed	Blank(s)	Blank(s)	25	450	3	0	3	10	0	999	No radiation and/or cancer-directed surgery	None	Dead (attributable to this cancer dx)	Alive or dead due to cancer	24	Colon excluding Rectum	One primary only	January	No/Unknown
4509141	2004	Female	77	White	Divorced	Sigmoid Colon	8140/3: Adenocarcinoma, NOS	C18.7-Sigmoid colon	Moderately differentiated; Grade II	Blank(s)	IIA	Blank(s)	Blank(s)	T3	Blank(s)	Blank(s)	N0	30	1 to 3 regional lymph nodes removed	Blank(s)	Blank(s)	18	450	3	0	3	3	0	999	No radiation and/or cancer-directed surgery	None	Alive or dead of other cause	Alive or dead due to cancer	119	Alive	One primary only	January	No/Unknown
4509143	2004	Female	65	White	Separated	Ascending Colon	8480/3: Mucinous adenocarcinoma	C18.2-Ascending colon	Moderately differentiated; Grade II	Blank(s)	IIA	Blank(s)	Blank(s)	T3	Blank(s)	Blank(s)	N0	40	4 or more regional lymph nodes removed	Blank(s)	Blank(s)	50	450	3	0	3	19	0	20	No radiation and/or cancer-directed surgery	None	Dead (attributable to this cancer dx)	Alive or dead due to cancer	81	Lung and Bronchus	One primary only	September	Yes
4509145	2004	Male	75	Asian or Pacific Islander	Married (including common law)	Cecum	8140/3: Adenocarcinoma, NOS	C18.0-Cecum	Moderately differentiated; Grade II	Blank(s)	IIA	Blank(s)	Blank(s)	T3	Blank(s)	Blank(s)	N0	40	4 or more regional lymph nodes removed	Blank(s)	Blank(s)	35	450	3	0	3	11	0	20	No radiation and/or cancer-directed surgery	None	Dead (attributable to this cancer dx)	Alive or dead due to cancer	59	Colon excluding Rectum	One primary only	December	No/Unknown
4509157	2004	Male	80	White	Married (including common law)	Sigmoid Colon	8140/3: Adenocarcinoma, NOS	C18.7-Sigmoid colon	Moderately differentiated; Grade II	Blank(s)	I	Blank(s)	Blank(s)	T2	Blank(s)	Blank(s)	N0	30	4 or more regional lymph nodes removed	Blank(s)	Blank(s)	999	200	3	0	3	15	0	20	No radiation and/or cancer-directed surgery	None	Alive or dead of other cause	Alive or dead due to cancer	110	Alive	One primary only	October	No/Unknown
4509158	2004	Female	76	White	Widowed	Ascending Colon	8480/3: Mucinous adenocarcinoma	C18.2-Ascending colon	Moderately differentiated; Grade II	Blank(s)	I	Blank(s)	Blank(s)	T2	Blank(s)	Blank(s)	N0	40	4 or more regional lymph nodes removed	Blank(s)	Blank(s)	3	200	3	0	3	25	0	998	No radiation and/or cancer-directed surgery	None	Alive or dead of other cause	Alive or dead due to cancer	110	Alive	One primary only	October	No/Unknown
4509163	2004	Female	78	White	Widowed	Hepatic Flexure	8140/3: Adenocarcinoma, NOS	C18.3-Hepatic flexure of colon	Moderately differentiated; Grade II	Blank(s)	IIA	Blank(s)	Blank(s)	T3	Blank(s)	Blank(s)	N0	30	4 or more regional lymph nodes removed	Blank(s)	Blank(s)	53	400	3	0	3	8	0	10	No radiation and/or cancer-directed surgery	None	Alive or dead of other cause	Alive or dead due to cancer	108	Alive	One primary only	December	No/Unknown
4509170	2004	Male	54	Black	Married (including common law)	Transverse Colon	8140/3: Adenocarcinoma, NOS	C18.4-Transverse colon	Moderately differentiated; Grade II	Blank(s)	IIIB	Blank(s)	Blank(s)	T3	Blank(s)	Blank(s)	N1	30	4 or more regional lymph nodes removed	Blank(s)	Blank(s)	43	400	3	300	3	14	1	998	No radiation and/or cancer-directed surgery	None	Dead (attributable to this cancer dx)	Alive or dead due to cancer	32	Colon excluding Rectum	One primary only	December	No/Unknown
4509174	2004	Male	65	White	Married (including common law)	Sigmoid Colon	8140/3: Adenocarcinoma, NOS	C18.7-Sigmoid colon	Moderately differentiated; Grade II	Blank(s)	IIA	Blank(s)	Blank(s)	T3	Blank(s)	Blank(s)	N0	50	4 or more regional lymph nodes removed	Blank(s)	Blank(s)	50	450	3	0	3	27	0	10	No radiation and/or cancer-directed surgery	None	Alive or dead of other cause	Alive or dead due to cancer	108	Alive	One primary only	December	Yes
4509180	2004	Female	56	Asian or Pacific Islander	Married (including common law)	Ascending Colon	8140/3: Adenocarcinoma, NOS	C18.2-Ascending colon	Poorly differentiated; Grade III	Blank(s)	IIA	Blank(s)	Blank(s)	T3	Blank(s)	Blank(s)	N0	40	4 or more regional lymph nodes removed	Blank(s)	Blank(s)	18	450	3	0	3	14	0	20	No radiation and/or cancer-directed surgery	None	Alive or dead of other cause	Alive or dead due to cancer	110	Alive	One primary only	October	No/Unknown
4509187	2004	Female	61	White	Married (including common law)	Descending Colon	8480/3: Mucinous adenocarcinoma	C18.6-Descending colon	Poorly differentiated; Grade III	Blank(s)	IIA	Blank(s)	Blank(s)	T3	Blank(s)	Blank(s)	N0	40	4 or more regional lymph nodes removed	Blank(s)	Blank(s)	100	400	3	0	3	21	0	999	No radiation and/or cancer-directed surgery	None	Alive or dead of other cause	Alive or dead due to cancer	108	Alive	One primary only	December	Yes
4509196	2004	Male	79	White	Married (including common law)	Ascending Colon	8140/3: Adenocarcinoma, NOS	C18.2-Ascending colon	Moderately differentiated; Grade II	Blank(s)	IIA	Blank(s)	Blank(s)	T3	Blank(s)	Blank(s)	N0	40	4 or more regional lymph nodes removed	Blank(s)	Blank(s)	100	400	3	0	3	20	0	10	No radiation and/or cancer-directed surgery	None	Alive or dead of other cause	Alive or dead due to cancer	108	Alive	One primary only	December	No/Unknown
4509238	2004	Female	46	White	Married (including common law)	Rectosigmoid Junction	8140/3: Adenocarcinoma, NOS	C19.9-Rectosigmoid junction	Moderately differentiated; Grade II	Blank(s)	IIA	Blank(s)	Blank(s)	T3	Blank(s)	Blank(s)	N0	30	4 or more regional lymph nodes removed	Blank(s)	Blank(s)	40	400	3	0	3	11	0	20	No radiation and/or cancer-directed surgery	None	Dead (attributable to this cancer dx)	Alive or dead due to cancer	32	Colon excluding Rectum	One primary only	December	No/Unknown
4509246	2004	Male	70	Asian or Pacific Islander	Married (including common law)	Rectosigmoid Junction	8140/3: Adenocarcinoma, NOS	C19.9-Rectosigmoid junction	Moderately differentiated; Grade II	Blank(s)	I	Blank(s)	Blank(s)	T2	Blank(s)	Blank(s)	N0	30	4 or more regional lymph nodes removed	Blank(s)	Blank(s)	20	200	3	0	3	9	0	20	No radiation and/or cancer-directed surgery	None	Alive or dead of other cause	Alive or dead due to cancer	109	Alive	One primary only	November	No/Unknown
4509278	2004	Male	51	White	Married (including common law)	Transverse Colon	8140/3: Adenocarcinoma, NOS	C18.4-Transverse colon	Moderately differentiated; Grade II	Blank(s)	IIIB	Blank(s)	Blank(s)	T3	Blank(s)	Blank(s)	N1	30	4 or more regional lymph nodes removed	Blank(s)	Blank(s)	52	400	3	100	3	4	1	998	No radiation and/or cancer-directed surgery	None	Alive or dead of other cause	Dead (attributable to causes other than this cancer dx)	1	Cerebrovascular Diseases	One primary only	August	No/Unknown
4509352	2005	Female	77	Asian or Pacific Islander	Widowed	Ascending Colon	8140/3: Adenocarcinoma, NOS	C18.2-Ascending colon	Moderately differentiated; Grade II	Blank(s)	IIA	Blank(s)	Blank(s)	T3	Blank(s)	Blank(s)	N0	40	4 or more regional lymph nodes removed	Blank(s)	Blank(s)	50	450	3	0	3	22	0	20	No radiation and/or cancer-directed surgery	None	Dead (attributable to this cancer dx)	Alive or dead due to cancer	22	Other Cause of Death	One primary only	January	No/Unknown
4509364	2004	Female	51	White	Single (never married)	Rectum	8140/3: Adenocarcinoma, NOS	C20.9-Rectum, NOS	Moderately differentiated; Grade II	Blank(s)	IIB	Blank(s)	Blank(s)	T4	Blank(s)	Blank(s)	N0	0	None	Blank(s)	Blank(s)	100	610	1	0	0	0	98	10	No radiation and/or cancer-directed surgery	Beam radiation	Dead (attributable to this cancer dx)	Alive or dead due to cancer	9	Rectum and Rectosigmoid Junction	One primary only	November	Yes
4509475	2004	Female	55	Asian or Pacific Islander	Single (never married)	Sigmoid Colon	8140/3: Adenocarcinoma, NOS	C18.7-Sigmoid colon	Moderately differentiated; Grade II	Blank(s)	IIA	Blank(s)	Blank(s)	T3	Blank(s)	Blank(s)	N0	30	4 or more regional lymph nodes removed	Blank(s)	Blank(s)	100	400	3	0	3	9	0	20	No radiation and/or cancer-directed surgery	None	Alive or dead of other cause	Alive or dead due to cancer	112	Alive	One primary only	August	No/Unknown
4509519	2004	Female	45	White	Married (including common law)	Rectum	8140/3: Adenocarcinoma, NOS	C20.9-Rectum, NOS	Moderately differentiated; Grade II	Blank(s)	IIA	Blank(s)	Blank(s)	T3	Blank(s)	Blank(s)	N0	27	None	Blank(s)	Blank(s)	35	400	1	0	0	0	98	997	Radiation prior to surgery	Beam radiation	Alive or dead of other cause	Alive or dead due to cancer	109	Alive	One primary only	November	Yes
4509734	2004	Female	31	Asian or Pacific Islander	Single (never married)	Sigmoid Colon	8140/3: Adenocarcinoma, NOS	C18.7-Sigmoid colon	Moderately differentiated; Grade II	Blank(s)	IIIB	Blank(s)	Blank(s)	T4	Blank(s)	Blank(s)	N1	30	4 or more regional lymph nodes removed	Blank(s)	Blank(s)	30	600	3	300	3	26	3	20	No radiation and/or cancer-directed surgery	None	Alive or dead of other cause	Alive or dead due to cancer	113	Alive	One primary only	July	Yes
4509777	2004	Female	44	Black	Single (never married)	Sigmoid Colon	8140/3: Adenocarcinoma, NOS	C18.7-Sigmoid colon	Moderately differentiated; Grade II	Blank(s)	IIIB	Blank(s)	Blank(s)	T3	Blank(s)	Blank(s)	N1	30	4 or more regional lymph nodes removed	Blank(s)	Blank(s)	50	450	3	300	3	10	2	20	No radiation and/or cancer-directed surgery	None	Dead (attributable to this cancer dx)	Alive or dead due to cancer	30	Colon excluding Rectum	One primary only	March	No/Unknown
4509783	2004	Male	67	White	Married (including common law)	Sigmoid Colon	8140/3: Adenocarcinoma, NOS	C18.7-Sigmoid colon	Moderately differentiated; Grade II	Blank(s)	IIIB	Blank(s)	Blank(s)	T3	Blank(s)	Blank(s)	N1	30	4 or more regional lymph nodes removed	Blank(s)	Blank(s)	999	450	3	100	3	11	1	20	No radiation and/or cancer-directed surgery	None	Alive or dead of other cause	Alive or dead due to cancer	116	Alive	One primary only	April	Yes
4509793	2004	Male	53	White	Single (never married)	Ascending Colon	8140/3: Adenocarcinoma, NOS	C18.2-Ascending colon	Poorly differentiated; Grade III	Blank(s)	IIIB	Blank(s)	Blank(s)	T3	Blank(s)	Blank(s)	N1	30	4 or more regional lymph nodes removed	Blank(s)	Blank(s)	100	450	3	800	3	14	7	10	No radiation and/or cancer-directed surgery	None	Dead (attributable to this cancer dx)	Alive or dead due to cancer	15	Colon excluding Rectum	One primary only	July	Yes
4509907	2004	Female	79	American Indian/Alaska Native	Widowed	Rectosigmoid Junction	8140/3: Adenocarcinoma, NOS	C19.9-Rectosigmoid junction	Moderately differentiated; Grade II	Blank(s)	IIIB	Blank(s)	Blank(s)	T3	Blank(s)	Blank(s)	N1	30	4 or more regional lymph nodes removed	Blank(s)	Blank(s)	35	450	3	100	3	7	1	20	No radiation and/or cancer-directed surgery	None	Alive or dead of other cause	Dead (attributable to causes other than this cancer dx)	85	Atherosclerosis	One primary only	April	No/Unknown
4509931	2004	Female	60	White	Divorced	Rectum	8140/3: Adenocarcinoma, NOS	C20.9-Rectum, NOS	Moderately differentiated; Grade II	Blank(s)	I	Blank(s)	Blank(s)	T2	Blank(s)	Blank(s)	N0	30	4 or more regional lymph nodes removed	Blank(s)	Blank(s)	20	200	3	0	3	10	0	999	No radiation and/or cancer-directed surgery	None	Dead (attributable to this cancer dx)	Alive or dead due to cancer	101	Colon excluding Rectum	One primary only	August	No/Unknown
4510000	2004	Female	62	Black	Married (including common law)	Ascending Colon	8140/3: Adenocarcinoma, NOS	C18.2-Ascending colon	Moderately differentiated; Grade II	Blank(s)	IIIB	Blank(s)	Blank(s)	T3	Blank(s)	Blank(s)	N1	40	4 or more regional lymph nodes removed	Blank(s)	Blank(s)	35	450	3	100	3	9	1	999	No radiation and/or cancer-directed surgery	None	Alive or dead of other cause	Dead (attributable to causes other than this cancer dx)	50	Diseases of Heart	One primary only	December	No/Unknown
4510038	2004	Male	76	Asian or Pacific Islander	Married (including common law)	Rectum	8140/3: Adenocarcinoma, NOS	C20.9-Rectum, NOS	Moderately differentiated; Grade II	Blank(s)	IIIA	Blank(s)	Blank(s)	T2	Blank(s)	Blank(s)	N1	50	4 or more regional lymph nodes removed	Blank(s)	Blank(s)	25	200	6	300	6	7	2	999	Radiation prior to surgery	Beam radiation	Alive or dead of other cause	Dead (attributable to causes other than this cancer dx)	3	Diabetes Mellitus	One primary only	December	Yes
4510146	2004	Male	62	Black	Single (never married)	Cecum	8140/3: Adenocarcinoma, NOS	C18.0-Cecum	Moderately differentiated; Grade II	Blank(s)	IIIC	Blank(s)	Blank(s)	T3	Blank(s)	Blank(s)	N2	40	4 or more regional lymph nodes removed	Blank(s)	Blank(s)	45	400	3	100	3	21	10	20	No radiation and/or cancer-directed surgery	None	Dead (attributable to this cancer dx)	Alive or dead due to cancer	85	Colon excluding Rectum	One primary only	September	Yes
4510174	2004	Female	72	Asian or Pacific Islander	Married (including common law)	Sigmoid Colon	8140/3: Adenocarcinoma, NOS	C18.7-Sigmoid colon	Moderately differentiated; Grade II	Blank(s)	IIA	Blank(s)	Blank(s)	T3	Blank(s)	Blank(s)	N0	30	4 or more regional lymph nodes removed	Blank(s)	Blank(s)	20	400	3	0	3	11	0	998	No radiation and/or cancer-directed surgery	None	Alive or dead of other cause	Alive or dead due to cancer	109	Alive	One primary only	November	No/Unknown
4510215	2004	Male	56	White	Divorced	Rectum	8140/3: Adenocarcinoma, NOS	C20.9-Rectum, NOS	Moderately differentiated; Grade II	Blank(s)	IIIC	Blank(s)	Blank(s)	T3	Blank(s)	Blank(s)	N2	30	4 or more regional lymph nodes removed	Blank(s)	Blank(s)	35	450	3	200	3	12	5	20	No radiation and/or cancer-directed surgery	None	Alive or dead of other cause	Alive or dead due to cancer	112	Alive	One primary only	August	Yes
4510387	2004	Male	76	White	Divorced	Rectum	8140/3: Adenocarcinoma, NOS	C20.9-Rectum, NOS	Well differentiated; Grade I	Blank(s)	IIA	Blank(s)	Blank(s)	T3	Blank(s)	Blank(s)	N0	0	None	Blank(s)	Blank(s)	999	450	1	0	0	0	98	998	No radiation and/or cancer-directed surgery	Beam radiation	Dead (attributable to this cancer dx)	Alive or dead due to cancer	3	Rectum and Rectosigmoid Junction	One primary only	May	Yes
4511317	2004	Female	72	White	Divorced	Transverse Colon	8140/3: Adenocarcinoma, NOS	C18.4-Transverse colon	Poorly differentiated; Grade III	Blank(s)	IIA	Blank(s)	Blank(s)	T3	Blank(s)	Blank(s)	N0	30	4 or more regional lymph nodes removed	Blank(s)	Blank(s)	63	450	3	0	3	10	0	999	No radiation and/or cancer-directed surgery	None	Alive or dead of other cause	Alive or dead due to cancer	109	Alive	One primary only	November	Yes
4511320	2004	Male	48	White	Single (never married)	Rectosigmoid Junction	8140/3: Adenocarcinoma, NOS	C19.9-Rectosigmoid junction	Moderately differentiated; Grade II	Blank(s)	IIA	Blank(s)	Blank(s)	T3	Blank(s)	Blank(s)	N0	30	4 or more regional lymph nodes removed	Blank(s)	Blank(s)	999	450	6	0	6	9	0	20	Radiation prior to surgery	Beam radiation	Dead (attributable to this cancer dx)	Alive or dead due to cancer	49	Colon excluding Rectum	One primary only	November	Yes
4511345	2004	Male	51	White	Single (never married)	Sigmoid Colon	8140/3: Adenocarcinoma, NOS	C18.7-Sigmoid colon	Moderately differentiated; Grade II	Blank(s)	IIB	Blank(s)	Blank(s)	T4	Blank(s)	Blank(s)	N0	30	4 or more regional lymph nodes removed	Blank(s)	Blank(s)	55	550	3	0	3	16	0	20	Radiation after surgery	Beam radiation	Dead (attributable to this cancer dx)	Alive or dead due to cancer	90	Colon excluding Rectum	One primary only	November	Yes
4511429	2004	Female	79	White	Single (never married)	Cecum	8140/3: Adenocarcinoma, NOS	C18.0-Cecum	Moderately differentiated; Grade II	Blank(s)	IIIB	Blank(s)	Blank(s)	T3	Blank(s)	Blank(s)	N1	40	4 or more regional lymph nodes removed	Blank(s)	Blank(s)	80	450	3	300	3	13	1	10	No radiation and/or cancer-directed surgery	None	Alive or dead of other cause	Alive or dead due to cancer	110	Alive	One primary only	October	Yes
4511431	2004	Female	54	White	Single (never married)	Sigmoid Colon	8140/3: Adenocarcinoma, NOS	C18.7-Sigmoid colon	Moderately differentiated; Grade II	Blank(s)	IIIC	Blank(s)	Blank(s)	T3	Blank(s)	Blank(s)	N2	30	4 or more regional lymph nodes removed	Blank(s)	Blank(s)	40	400	3	100	3	10	7	999	No radiation and/or cancer-directed surgery	None	Alive or dead of other cause	Alive or dead due to cancer	110	Alive	One primary only	October	Yes
4511432	2004	Male	55	White	Married (including common law)	Splenic Flexure	8140/3: Adenocarcinoma, NOS	C18.5-Splenic flexure of colon	Moderately differentiated; Grade II	Blank(s)	IIA	Blank(s)	Blank(s)	T3	Blank(s)	Blank(s)	N0	40	4 or more regional lymph nodes removed	Blank(s)	Blank(s)	45	400	3	0	3	18	0	10	No radiation and/or cancer-directed surgery	None	Alive or dead of other cause	Alive or dead due to cancer	110	Alive	One primary only	October	No/Unknown
4511438	2004	Female	56	White	Divorced	Sigmoid Colon	8140/3: Adenocarcinoma, NOS	C18.7-Sigmoid colon	Moderately differentiated; Grade II	Blank(s)	IIA	Blank(s)	Blank(s)	T3	Blank(s)	Blank(s)	N0	30	4 or more regional lymph nodes removed	Blank(s)	Blank(s)	45	400	3	0	3	13	0	999	No radiation and/or cancer-directed surgery	None	Alive or dead of other cause	Alive or dead due to cancer	109	Alive	One primary only	November	No/Unknown
4511463	2004	Female	80	White	Widowed	Ascending Colon	8140/3: Adenocarcinoma, NOS	C18.2-Ascending colon	Poorly differentiated; Grade III	Blank(s)	IIIC	Blank(s)	Blank(s)	T4	Blank(s)	Blank(s)	N2	30	4 or more regional lymph nodes removed	Blank(s)	Blank(s)	999	500	3	100	3	23	4	20	No radiation and/or cancer-directed surgery	None	Alive or dead of other cause	Alive or dead due to cancer	111	Alive	One primary only	September	Yes
4511473	2004	Male	61	White	Married (including common law)	Transverse Colon	8140/3: Adenocarcinoma, NOS	C18.4-Transverse colon	Moderately differentiated; Grade II	Blank(s)	IIIC	Blank(s)	Blank(s)	T3	Blank(s)	Blank(s)	N2	30	4 or more regional lymph nodes removed	Blank(s)	Blank(s)	20	400	3	100	3	8	5	20	No radiation and/or cancer-directed surgery	None	Alive or dead of other cause	Alive or dead due to cancer	111	Alive	One primary only	September	Yes
4511476	2004	Female	64	White	Married (including common law)	Rectum	8140/3: Adenocarcinoma, NOS	C20.9-Rectum, NOS	Moderately differentiated; Grade II	Blank(s)	I	Blank(s)	Blank(s)	T2	Blank(s)	Blank(s)	N0	30	4 or more regional lymph nodes removed	Blank(s)	Blank(s)	22	200	3	0	3	7	0	20	No radiation and/or cancer-directed surgery	None	Alive or dead of other cause	Alive or dead due to cancer	110	Alive	One primary only	October	No/Unknown
4511477	2004	Male	45	White	Single (never married)	Cecum	8140/3: Adenocarcinoma, NOS	C18.0-Cecum	Moderately differentiated; Grade II	Blank(s)	I	Blank(s)	Blank(s)	T2	Blank(s)	Blank(s)	N0	40	4 or more regional lymph nodes removed	Blank(s)	Blank(s)	50	200	3	0	3	19	0	20	No radiation and/or cancer-directed surgery	None	Alive or dead of other cause	Alive or dead due to cancer	111	Alive	One primary only	September	No/Unknown
4511489	2004	Female	77	White	Divorced	Cecum	8480/3: Mucinous adenocarcinoma	C18.0-Cecum	Poorly differentiated; Grade III	Blank(s)	IIA	Blank(s)	Blank(s)	T3	Blank(s)	Blank(s)	N0	40	4 or more regional lymph nodes removed	Blank(s)	Blank(s)	30	400	3	0	3	17	0	998	No radiation and/or cancer-directed surgery	None	Alive or dead of other cause	Alive or dead due to cancer	110	Alive	One primary only	October	No/Unknown
4511508	2004	Male	66	Asian or Pacific Islander	Married (including common law)	Sigmoid Colon	8140/3: Adenocarcinoma, NOS	C18.7-Sigmoid colon	Moderately differentiated; Grade II	Blank(s)	I	Blank(s)	Blank(s)	T2	Blank(s)	Blank(s)	N0	30	4 or more regional lymph nodes removed	Blank(s)	Blank(s)	24	200	3	0	3	7	0	998	No radiation and/or cancer-directed surgery	None	Alive or dead of other cause	Dead (attributable to causes other than this cancer dx)	2	Diseases of Heart	One primary only	February	No/Unknown
4511518	2004	Female	63	Asian or Pacific Islander	Married (including common law)	Transverse Colon	8140/3: Adenocarcinoma, NOS	C18.4-Transverse colon	Poorly differentiated; Grade III	Blank(s)	IIIC	Blank(s)	Blank(s)	T2	Blank(s)	Blank(s)	N2	30	4 or more regional lymph nodes removed	Blank(s)	Blank(s)	35	200	3	100	3	15	4	998	No radiation and/or cancer-directed surgery	None	Alive or dead of other cause	Alive or dead due to cancer	115	Alive	One primary only	May	No/Unknown
4511538	2004	Male	74	White	Widowed	Cecum	8140/3: Adenocarcinoma, NOS	C18.0-Cecum	Well differentiated; Grade I	Blank(s)	IIA	Blank(s)	Blank(s)	T3	Blank(s)	Blank(s)	N0	40	4 or more regional lymph nodes removed	Blank(s)	Blank(s)	60	450	3	0	3	10	0	20	No radiation and/or cancer-directed surgery	None	Dead (attributable to this cancer dx)	Alive or dead due to cancer	24	Colon excluding Rectum	One primary only	October	Yes
4511549	2004	Male	73	White	Married (including common law)	Hepatic Flexure	8480/3: Mucinous adenocarcinoma	C18.3-Hepatic flexure of colon	Poorly differentiated; Grade III	Blank(s)	IIIB	Blank(s)	Blank(s)	T3	Blank(s)	Blank(s)	N1	40	4 or more regional lymph nodes removed	Blank(s)	Blank(s)	30	450	3	300	3	9	2	20	No radiation and/or cancer-directed surgery	None	Alive or dead of other cause	Dead (attributable to causes other than this cancer dx)	87	Chronic Obstructive Pulmonary Disease and Allied Cond	One primary only	September	Yes
4511559	2004	Male	67	White	Single (never married)	Transverse Colon	8140/3: Adenocarcinoma, NOS	C18.4-Transverse colon	Moderately differentiated; Grade II	Blank(s)	IIA	Blank(s)	Blank(s)	T3	Blank(s)	Blank(s)	N0	40	4 or more regional lymph nodes removed	Blank(s)	Blank(s)	35	450	3	0	3	9	0	20	No radiation and/or cancer-directed surgery	None	Alive or dead of other cause	Dead (attributable to causes other than this cancer dx)	81	Diseases of Heart	One primary only	October	No/Unknown
4511601	2004	Male	67	Black	Married (including common law)	Cecum	8140/3: Adenocarcinoma, NOS	C18.0-Cecum	Poorly differentiated; Grade III	Blank(s)	IIIC	Blank(s)	Blank(s)	T4	Blank(s)	Blank(s)	N2	40	4 or more regional lymph nodes removed	Blank(s)	Blank(s)	45	550	3	300	3	18	4	20	No radiation and/or cancer-directed surgery	None	Dead (attributable to this cancer dx)	Alive or dead due to cancer	5	Colon excluding Rectum	One primary only	November	Yes
4511605	2004	Male	47	White	Married (including common law)	Rectum	8140/3: Adenocarcinoma, NOS	C20.9-Rectum, NOS	Moderately differentiated; Grade II	Blank(s)	IIIB	Blank(s)	Blank(s)	T3	Blank(s)	Blank(s)	N1	30	4 or more regional lymph nodes removed	Blank(s)	Blank(s)	46	400	5	100	5	17	0	20	Radiation prior to surgery	Beam radiation	Alive or dead of other cause	Alive or dead due to cancer	109	Alive	One primary only	November	Yes
4511610	2004	Female	48	Black	Single (never married)	Cecum	8140/3: Adenocarcinoma, NOS	C18.0-Cecum	Moderately differentiated; Grade II	Blank(s)	IIIC	Blank(s)	Blank(s)	T3	Blank(s)	Blank(s)	N2	40	4 or more regional lymph nodes removed	Blank(s)	Blank(s)	30	450	3	300	3	14	4	999	No radiation and/or cancer-directed surgery	None	Dead (attributable to this cancer dx)	Alive or dead due to cancer	21	Colon excluding Rectum	One primary only	December	Yes
4511655	2004	Male	63	White	Divorced	Ascending Colon	8140/3: Adenocarcinoma, NOS	C18.2-Ascending colon	Moderately differentiated; Grade II	Blank(s)	IIA	Blank(s)	Blank(s)	T3	Blank(s)	Blank(s)	N0	40	4 or more regional lymph nodes removed	Blank(s)	Blank(s)	35	400	3	0	3	20	0	20	No radiation and/or cancer-directed surgery	None	Alive or dead of other cause	Alive or dead due to cancer	109	Alive	One primary only	November	No/Unknown
4511661	2004	Male	61	White	Single (never married)	Cecum	8140/3: Adenocarcinoma, NOS	C18.0-Cecum	Poorly differentiated; Grade III	Blank(s)	IIIC	Blank(s)	Blank(s)	T4	Blank(s)	Blank(s)	N2	40	4 or more regional lymph nodes removed	Blank(s)	Blank(s)	60	500	3	100	3	10	5	10	No radiation and/or cancer-directed surgery	None	Dead (attributable to this cancer dx)	Alive or dead due to cancer	7	Colon excluding Rectum	One primary only	December	No/Unknown
4511669	2004	Male	50	White	Married (including common law)	Sigmoid Colon	8140/3: Adenocarcinoma, NOS	C18.7-Sigmoid colon	Moderately differentiated; Grade II	Blank(s)	IIIB	Blank(s)	Blank(s)	T3	Blank(s)	Blank(s)	N1	30	4 or more regional lymph nodes removed	Blank(s)	Blank(s)	55	400	3	100	3	21	1	999	No radiation and/or cancer-directed surgery	None	Alive or dead of other cause	Alive or dead due to cancer	109	Alive	One primary only	November	Yes
4511691	2004	Female	49	Asian or Pacific Islander	Single (never married)	Sigmoid Colon	8140/3: Adenocarcinoma, NOS	C18.7-Sigmoid colon	Moderately differentiated; Grade II	Blank(s)	IIA	Blank(s)	Blank(s)	T3	Blank(s)	Blank(s)	N0	30	Number of regional lymph nodes removed unknown	Blank(s)	Blank(s)	50	400	3	0	3	33	0	20	No radiation and/or cancer-directed surgery	None	Dead (attributable to this cancer dx)	Alive or dead due to cancer	83	Colon excluding Rectum	One primary only	December	No/Unknown
4511729	2004	Female	77	White	Married (including common law)	Ascending Colon	8140/3: Adenocarcinoma, NOS	C18.2-Ascending colon	Moderately differentiated; Grade II	Blank(s)	I	Blank(s)	Blank(s)	T1	Blank(s)	Blank(s)	N0	30	4 or more regional lymph nodes removed	Blank(s)	Blank(s)	40	160	3	0	3	48	0	10	No radiation and/or cancer-directed surgery	None	Alive or dead of other cause	Alive or dead due to cancer	110	Alive	One primary only	October	No/Unknown
4511776	2004	Male	78	White	Married (including common law)	Rectum	8140/3: Adenocarcinoma, NOS	C20.9-Rectum, NOS	Moderately differentiated; Grade II	Blank(s)	I	Blank(s)	Blank(s)	T2	Blank(s)	Blank(s)	N0	50	1 to 3 regional lymph nodes removed	Blank(s)	Blank(s)	15	200	3	0	3	3	0	998	No radiation and/or cancer-directed surgery	None	Alive or dead of other cause	Alive or dead due to cancer	116	Alive	One primary only	April	No/Unknown
4511789	2004	Male	53	White	Married (including common law)	Transverse Colon	8140/3: Adenocarcinoma, NOS	C18.4-Transverse colon	Moderately differentiated; Grade II	Blank(s)	IIA	Blank(s)	Blank(s)	T3	Blank(s)	Blank(s)	N0	30	4 or more regional lymph nodes removed	Blank(s)	Blank(s)	65	450	3	0	3	15	0	20	No radiation and/or cancer-directed surgery	None	Alive or dead of other cause	Alive or dead due to cancer	108	Alive	One primary only	December	Yes
4511794	2004	Male	66	Black	Married (including common law)	Hepatic Flexure	8480/3: Mucinous adenocarcinoma	C18.3-Hepatic flexure of colon	Poorly differentiated; Grade III	Blank(s)	IIIC	Blank(s)	Blank(s)	T3	Blank(s)	Blank(s)	N2	41	4 or more regional lymph nodes removed	Blank(s)	Blank(s)	25	450	3	100	3	11	7	999	No radiation and/or cancer-directed surgery	None	Dead (attributable to this cancer dx)	Alive or dead due to cancer	26	Colon excluding Rectum	One primary only	June	Yes
4511805	2004	Male	74	White	Divorced	Transverse Colon	8140/3: Adenocarcinoma, NOS	C18.4-Transverse colon	Poorly differentiated; Grade III	Blank(s)	IIA	Blank(s)	Blank(s)	T3	Blank(s)	Blank(s)	N0	30	4 or more regional lymph nodes removed	Blank(s)	Blank(s)	85	450	3	0	3	24	0	10	No radiation and/or cancer-directed surgery	None	Dead (attributable to this cancer dx)	Alive or dead due to cancer	13	Colon excluding Rectum	One primary only	December	No/Unknown
4511808	2004	Female	67	Asian or Pacific Islander	Married (including common law)	Splenic Flexure	8140/3: Adenocarcinoma, NOS	C18.5-Splenic flexure of colon	Moderately differentiated; Grade II	Blank(s)	IIA	Blank(s)	Blank(s)	T3	Blank(s)	Blank(s)	N0	40	4 or more regional lymph nodes removed	Blank(s)	Blank(s)	40	400	3	0	3	15	0	20	No radiation and/or cancer-directed surgery	None	Alive or dead of other cause	Alive or dead due to cancer	119	Alive	One primary only	January	No/Unknown
4511813	2004	Female	80	Black	Single (never married)	Cecum	8140/3: Adenocarcinoma, NOS	C18.0-Cecum	Poorly differentiated; Grade III	Blank(s)	IIA	Blank(s)	Blank(s)	T3	Blank(s)	Blank(s)	N0	0	None	Blank(s)	Blank(s)	999	458	1	0	0	0	98	10	No radiation and/or cancer-directed surgery	None	Dead (attributable to this cancer dx)	Alive or dead due to cancer	6	Colon excluding Rectum	One primary only	November	No/Unknown
4511862	2004	Male	77	White	Widowed	Sigmoid Colon	8140/3: Adenocarcinoma, NOS	C18.7-Sigmoid colon	Moderately differentiated; Grade II	Blank(s)	IIIC	Blank(s)	Blank(s)	T4	Blank(s)	Blank(s)	N2	30	4 or more regional lymph nodes removed	Blank(s)	Blank(s)	30	500	3	300	3	9	7	10	No radiation and/or cancer-directed surgery	None	Dead (attributable to this cancer dx)	Alive or dead due to cancer	25	Colon excluding Rectum	One primary only	May	No/Unknown
4511919	2004	Male	61	White	Single (never married)	Rectosigmoid Junction	8140/3: Adenocarcinoma, NOS	C19.9-Rectosigmoid junction	Moderately differentiated; Grade II	Blank(s)	IIIB	Blank(s)	Blank(s)	T3	Blank(s)	Blank(s)	N1	30	4 or more regional lymph nodes removed	Blank(s)	Blank(s)	30	450	6	300	6	6	1	999	Radiation prior to surgery	Beam radiation	Alive or dead of other cause	Dead (attributable to causes other than this cancer dx)	40	Other Cause of Death	One primary only	December	No/Unknown
4512266	2004	Female	80	Asian or Pacific Islander	Married (including common law)	Sigmoid Colon	8140/3: Adenocarcinoma, NOS	C18.7-Sigmoid colon	Poorly differentiated; Grade III	Blank(s)	IIIB	Blank(s)	Blank(s)	T3	Blank(s)	Blank(s)	N1	30	4 or more regional lymph nodes removed	Blank(s)	Blank(s)	60	400	3	300	3	15	2	10	No radiation and/or cancer-directed surgery	None	Alive or dead of other cause	Dead (attributable to causes other than this cancer dx)	19	State DC not available or state DC available but no COD	One primary only	March	No/Unknown
4512269	2004	Female	37	Asian or Pacific Islander	Married (including common law)	Sigmoid Colon	8140/3: Adenocarcinoma, NOS	C18.7-Sigmoid colon	Moderately differentiated; Grade II	Blank(s)	IIIB	Blank(s)	Blank(s)	T3	Blank(s)	Blank(s)	N1	30	4 or more regional lymph nodes removed	Blank(s)	Blank(s)	45	450	3	300	3	13	1	20	No radiation and/or cancer-directed surgery	None	Alive or dead of other cause	Alive or dead due to cancer	118	Alive	One primary only	February	Yes
4512272	2004	Female	73	White	Married (including common law)	Sigmoid Colon	8480/3: Mucinous adenocarcinoma	C18.7-Sigmoid colon	Moderately differentiated; Grade II	Blank(s)	IIA	Blank(s)	Blank(s)	T3	Blank(s)	Blank(s)	N0	50	4 or more regional lymph nodes removed	Blank(s)	Blank(s)	80	400	3	0	3	13	0	20	No radiation and/or cancer-directed surgery	None	Alive or dead of other cause	Alive or dead due to cancer	110	Alive	One primary only	October	Yes
4512274	2004	Female	69	White	Widowed	Sigmoid Colon	8140/3: Adenocarcinoma, NOS	C18.7-Sigmoid colon	Moderately differentiated; Grade II	Blank(s)	I	Blank(s)	Blank(s)	T2	Blank(s)	Blank(s)	N0	30	4 or more regional lymph nodes removed	Blank(s)	Blank(s)	65	200	3	0	3	7	0	10	No radiation and/or cancer-directed surgery	None	Alive or dead of other cause	Dead (attributable to causes other than this cancer dx)	69	Diseases of Heart	One primary only	October	No/Unknown
4512279	2004	Male	72	White	Married (including common law)	Sigmoid Colon	8480/3: Mucinous adenocarcinoma	C18.7-Sigmoid colon	Moderately differentiated; Grade II	Blank(s)	IIA	Blank(s)	Blank(s)	T3	Blank(s)	Blank(s)	N0	30	4 or more regional lymph nodes removed	Blank(s)	Blank(s)	50	400	3	0	3	27	0	20	No radiation and/or cancer-directed surgery	None	Dead (attributable to this cancer dx)	Alive or dead due to cancer	61	Colon excluding Rectum	One primary only	December	No/Unknown
4512341	2004	Female	53	White	Married (including common law)	Rectum	8140/3: Adenocarcinoma, NOS	C20.9-Rectum, NOS	Moderately differentiated; Grade II	Blank(s)	I	Blank(s)	Blank(s)	T2	Blank(s)	Blank(s)	N0	30	4 or more regional lymph nodes removed	Blank(s)	Blank(s)	40	200	3	0	3	12	0	20	Radiation before and after surgery	Beam radiation	Alive or dead of other cause	Alive or dead due to cancer	109	Alive	One primary only	November	Yes
4512902	2004	Male	58	White	Married (including common law)	Rectum	8140/3: Adenocarcinoma, NOS	C20.9-Rectum, NOS	Moderately differentiated; Grade II	Blank(s)	IIA	Blank(s)	Blank(s)	T3	Blank(s)	Blank(s)	N0	30	4 or more regional lymph nodes removed	Blank(s)	Blank(s)	15	450	3	0	0	7	0	10	Radiation prior to surgery	Beam radiation	Alive or dead of other cause	Alive or dead due to cancer	108	Alive	One primary only	December	Yes
4513180	2004	Female	50	White	Married (including common law)	Sigmoid Colon	8140/3: Adenocarcinoma, NOS	C18.7-Sigmoid colon	Moderately differentiated; Grade II	Blank(s)	IIIB	Blank(s)	Blank(s)	T3	Blank(s)	Blank(s)	N1	30	4 or more regional lymph nodes removed	Blank(s)	Blank(s)	35	400	3	200	3	18	1	20	No radiation and/or cancer-directed surgery	None	Alive or dead of other cause	Alive or dead due to cancer	116	Alive	One primary only	April	Yes
4513237	2004	Female	56	Asian or Pacific Islander	Married (including common law)	Descending Colon	8140/3: Adenocarcinoma, NOS	C18.6-Descending colon	Moderately differentiated; Grade II	Blank(s)	IIIC	Blank(s)	Blank(s)	T3	Blank(s)	Blank(s)	N2	40	4 or more regional lymph nodes removed	Blank(s)	Blank(s)	65	450	3	300	3	17	4	10	No radiation and/or cancer-directed surgery	None	Dead (attributable to this cancer dx)	Alive or dead due to cancer	99	Colon excluding Rectum	One primary only	October	Yes
4513246	2004	Male	51	White	Married (including common law)	Rectum	8140/3: Adenocarcinoma, NOS	C20.9-Rectum, NOS	Moderately differentiated; Grade II	Blank(s)	I	Blank(s)	Blank(s)	T2	Blank(s)	Blank(s)	N0	30	4 or more regional lymph nodes removed	Blank(s)	Blank(s)	45	200	3	0	3	21	0	998	No radiation and/or cancer-directed surgery	None	Alive or dead of other cause	Alive or dead due to cancer	109	Alive	One primary only	November	No/Unknown
4513257	2004	Male	75	White	Married (including common law)	Cecum	8140/3: Adenocarcinoma, NOS	C18.0-Cecum	Moderately differentiated; Grade II	Blank(s)	I	Blank(s)	Blank(s)	T2	Blank(s)	Blank(s)	N0	40	4 or more regional lymph nodes removed	Blank(s)	Blank(s)	25	200	3	0	3	4	0	20	No radiation and/or cancer-directed surgery	None	Alive or dead of other cause	Alive or dead due to cancer	110	Alive	One primary only	October	No/Unknown
4513270	2004	Male	62	White	Married (including common law)	Ascending Colon	8140/3: Adenocarcinoma, NOS	C18.2-Ascending colon	Moderately differentiated; Grade II	Blank(s)	IIIC	Blank(s)	Blank(s)	T4	Blank(s)	Blank(s)	N2	40	4 or more regional lymph nodes removed	Blank(s)	Blank(s)	45	500	3	100	3	18	9	999	No radiation and/or cancer-directed surgery	None	Dead (attributable to this cancer dx)	Alive or dead due to cancer	49	Colon excluding Rectum	One primary only	October	Yes
4513289	2004	Male	70	White	Single (never married)	Sigmoid Colon	8140/3: Adenocarcinoma, NOS	C18.7-Sigmoid colon	Moderately differentiated; Grade II	Blank(s)	IIA	Blank(s)	Blank(s)	T3	Blank(s)	Blank(s)	N0	30	4 or more regional lymph nodes removed	Blank(s)	Blank(s)	47	400	3	0	3	9	0	20	No radiation and/or cancer-directed surgery	None	Alive or dead of other cause	Dead (attributable to causes other than this cancer dx)	59	Cerebrovascular Diseases	One primary only	December	No/Unknown
4513316	2004	Female	65	Asian or Pacific Islander	Single (never married)	Rectosigmoid Junction	8140/3: Adenocarcinoma, NOS	C19.9-Rectosigmoid junction	Moderately differentiated; Grade II	Blank(s)	IIIB	Blank(s)	Blank(s)	T3	Blank(s)	Blank(s)	N1	30	4 or more regional lymph nodes removed	Blank(s)	Blank(s)	30	450	3	100	3	9	3	20	No radiation and/or cancer-directed surgery	None	Alive or dead of other cause	Alive or dead due to cancer	103	Alive	One primary only	November	Yes
4513327	2004	Male	80	White	Married (including common law)	Ascending Colon	8140/3: Adenocarcinoma, NOS	C18.2-Ascending colon	Moderately differentiated; Grade II	Blank(s)	IIA	Blank(s)	Blank(s)	T3	Blank(s)	Blank(s)	N0	80	4 or more regional lymph nodes removed	Blank(s)	Blank(s)	55	450	3	0	3	8	0	998	No radiation and/or cancer-directed surgery	None	Alive or dead of other cause	Dead (attributable to causes other than this cancer dx)	62	Other Cause of Death	One primary only	December	No/Unknown
4513372	2004	Male	68	White	Single (never married)	Sigmoid Colon	8140/3: Adenocarcinoma, NOS	C18.7-Sigmoid colon	Moderately differentiated; Grade II	Blank(s)	IIA	Blank(s)	Blank(s)	T3	Blank(s)	Blank(s)	N0	30	4 or more regional lymph nodes removed	Blank(s)	Blank(s)	999	458	3	0	3	16	0	20	No radiation and/or cancer-directed surgery	None	Alive or dead of other cause	Alive or dead due to cancer	111	Alive	One primary only	September	No/Unknown
4513811	2005	Female	34	White	Single (never married)	Rectum	8140/3: Adenocarcinoma, NOS	C20.9-Rectum, NOS	Moderately differentiated; Grade II	Blank(s)	IIIB	Blank(s)	Blank(s)	T4	Blank(s)	Blank(s)	N1	50	4 or more regional lymph nodes removed	Blank(s)	Blank(s)	72	610	6	100	6	5	1	998	Radiation prior to surgery	Beam radiation	Alive or dead of other cause	Alive or dead due to cancer	107	Alive	One primary only	January	Yes
4515892	2004	Male	70	Asian or Pacific Islander	Married (including common law)	Rectum	8140/3: Adenocarcinoma, NOS	C20.9-Rectum, NOS	Well differentiated; Grade I	Blank(s)	IIIA	Blank(s)	Blank(s)	T2	Blank(s)	Blank(s)	N1	50	4 or more regional lymph nodes removed	Blank(s)	Blank(s)	21	200	3	100	3	4	1	999	Radiation after surgery	Beam radiation	Alive or dead of other cause	Alive or dead due to cancer	108	Alive	One primary only	December	Yes
4516147	2004	Male	66	Black	Married (including common law)	Rectum	8140/3: Adenocarcinoma, NOS	C20.9-Rectum, NOS	Moderately differentiated; Grade II	Blank(s)	I	Blank(s)	Blank(s)	T1	Blank(s)	Blank(s)	N0	30	4 or more regional lymph nodes removed	Blank(s)	Blank(s)	999	160	3	0	3	4	0	20	No radiation and/or cancer-directed surgery	None	Alive or dead of other cause	Alive or dead due to cancer	109	Alive	One primary only	November	No/Unknown
4516197	2005	Male	51	White	Married (including common law)	Descending Colon	8140/3: Adenocarcinoma, NOS	C18.6-Descending colon	Moderately differentiated; Grade II	Blank(s)	IIIA	Blank(s)	Blank(s)	T2	Blank(s)	Blank(s)	N1	40	4 or more regional lymph nodes removed	Blank(s)	Blank(s)	30	200	3	300	3	5	3	20	No radiation and/or cancer-directed surgery	None	Alive or dead of other cause	Alive or dead due to cancer	102	Alive	One primary only	June	Yes
4516218	2005	Male	68	Black	Single (never married)	Sigmoid Colon	8140/3: Adenocarcinoma, NOS	C18.7-Sigmoid colon	Moderately differentiated; Grade II	Blank(s)	IIIB	Blank(s)	Blank(s)	T4	Blank(s)	Blank(s)	N1	32	1 to 3 regional lymph nodes removed	Blank(s)	Blank(s)	35	750	3	300	3	12	1	999	No radiation and/or cancer-directed surgery	None	Dead (attributable to this cancer dx)	Alive or dead due to cancer	45	Colon excluding Rectum	One primary only	January	Yes
4516234	2005	Male	51	White	Single (never married)	Rectum	8140/3: Adenocarcinoma, NOS	C20.9-Rectum, NOS	Poorly differentiated; Grade III	Blank(s)	IIIB	Blank(s)	Blank(s)	T4	Blank(s)	Blank(s)	N1	70	4 or more regional lymph nodes removed	Blank(s)	Blank(s)	40	610	5	300	5	8	3	20	Radiation prior to surgery	Beam radiation	Dead (attributable to this cancer dx)	Alive or dead due to cancer	45	Rectum and Rectosigmoid Junction	One primary only	March	Yes
4516274	2005	Male	72	Black	Single (never married)	Cecum	8140/3: Adenocarcinoma, NOS	C18.0-Cecum	Moderately differentiated; Grade II	Blank(s)	IIA	Blank(s)	Blank(s)	T3	Blank(s)	Blank(s)	N0	40	4 or more regional lymph nodes removed	Blank(s)	Blank(s)	32	400	3	0	3	13	0	999	No radiation and/or cancer-directed surgery	None	Alive or dead of other cause	Alive or dead due to cancer	107	Alive	One primary only	January	No/Unknown
4516354	2004	Female	72	White	Widowed	Rectum	8140/3: Adenocarcinoma, NOS	C20.9-Rectum, NOS	Moderately differentiated; Grade II	Blank(s)	IIA	Blank(s)	Blank(s)	T3	Blank(s)	Blank(s)	N0	30	4 or more regional lymph nodes removed	Blank(s)	Blank(s)	999	458	3	0	3	5	0	998	Radiation after surgery	Beam radiation	Dead (attributable to this cancer dx)	Alive or dead due to cancer	33	Rectum and Rectosigmoid Junction	One primary only	July	Yes
4516471	2005	Female	71	Black	Married (including common law)	Rectum	8140/3: Adenocarcinoma, NOS	C20.9-Rectum, NOS	Moderately differentiated; Grade II	Blank(s)	IIIB	Blank(s)	Blank(s)	T3	Blank(s)	Blank(s)	N1	0	None	Blank(s)	Blank(s)	60	455	1	300	0	0	98	998	No radiation and/or cancer-directed surgery	Beam radiation	Alive or dead of other cause	Alive or dead due to cancer	104	Alive	One primary only	April	Yes
4516473	2005	Male	63	White	Single (never married)	Rectum	8140/3: Adenocarcinoma, NOS	C20.9-Rectum, NOS	Moderately differentiated; Grade II	Blank(s)	IIA	Blank(s)	Blank(s)	T3	Blank(s)	Blank(s)	N0	26	None	Blank(s)	Blank(s)	20	400	3	0	0	0	98	999	Radiation after surgery	Beam radiation	Dead (attributable to this cancer dx)	Alive or dead due to cancer	34	Rectum and Rectosigmoid Junction	One primary only	July	Yes
4516481	2005	Male	39	Black	Divorced	Rectum	8140/3: Adenocarcinoma, NOS	C20.9-Rectum, NOS	Moderately differentiated; Grade II	Blank(s)	IIA	Blank(s)	Blank(s)	T3	Blank(s)	Blank(s)	N0	30	4 or more regional lymph nodes removed	Blank(s)	Blank(s)	30	400	3	0	3	10	0	999	Radiation after surgery	Beam radiation	Alive or dead of other cause	Alive or dead due to cancer	104	Alive	One primary only	April	Yes
4516506	2005	Male	78	White	Widowed	Sigmoid Colon	8140/3: Adenocarcinoma, NOS	C18.7-Sigmoid colon	Moderately differentiated; Grade II	Blank(s)	IIB	Blank(s)	Blank(s)	T4	Blank(s)	Blank(s)	N0	30	None	Blank(s)	Blank(s)	65	500	3	0	0	0	98	999	No radiation and/or cancer-directed surgery	None	Dead (attributable to this cancer dx)	Alive or dead due to cancer	35	Colon excluding Rectum	One primary only	April	No/Unknown
4516550	2005	Female	67	White	Married (including common law)	Ascending Colon	8140/3: Adenocarcinoma, NOS	C18.2-Ascending colon	Moderately differentiated; Grade II	Blank(s)	IIA	Blank(s)	Blank(s)	T3	Blank(s)	Blank(s)	N0	30	4 or more regional lymph nodes removed	Blank(s)	Blank(s)	40	450	3	0	3	17	0	998	No radiation and/or cancer-directed surgery	None	Alive or dead of other cause	Alive or dead due to cancer	105	Alive	One primary only	March	Yes
4516596	2005	Male	62	Asian or Pacific Islander	Married (including common law)	Transverse Colon	8140/3: Adenocarcinoma, NOS	C18.4-Transverse colon	Moderately differentiated; Grade II	Blank(s)	I	Blank(s)	Blank(s)	T2	Blank(s)	Blank(s)	N0	30	4 or more regional lymph nodes removed	Blank(s)	Blank(s)	120	200	3	0	3	14	0	20	No radiation and/or cancer-directed surgery	None	Alive or dead of other cause	Alive or dead due to cancer	102	Alive	One primary only	June	No/Unknown
4516615	2005	Male	72	Black	Married (including common law)	Descending Colon	8140/3: Adenocarcinoma, NOS	C18.6-Descending colon	Moderately differentiated; Grade II	Blank(s)	IIIC	Blank(s)	Blank(s)	T3	Blank(s)	Blank(s)	N2	30	4 or more regional lymph nodes removed	Blank(s)	Blank(s)	45	400	3	300	3	14	4	998	No radiation and/or cancer-directed surgery	None	Alive or dead of other cause	Alive or dead due to cancer	103	Alive	One primary only	May	Yes
4516632	2005	Female	62	Asian or Pacific Islander	Married (including common law)	Sigmoid Colon	8140/3: Adenocarcinoma, NOS	C18.7-Sigmoid colon	Moderately differentiated; Grade II	Blank(s)	IIIB	Blank(s)	Blank(s)	T3	Blank(s)	Blank(s)	N1	30	4 or more regional lymph nodes removed	Blank(s)	Blank(s)	50	400	3	100	3	14	1	20	No radiation and/or cancer-directed surgery	None	Alive or dead of other cause	Alive or dead due to cancer	103	Alive	One primary only	May	Yes
4516663	2006	Female	78	White	Widowed	Rectum	8140/3: Adenocarcinoma, NOS	C20.9-Rectum, NOS	Moderately differentiated; Grade II	Blank(s)	IIIB	Blank(s)	Blank(s)	T3	Blank(s)	Blank(s)	N1	30	4 or more regional lymph nodes removed	Blank(s)	Blank(s)	40	400	3	300	3	14	1	10	Radiation after surgery	Beam radiation	Alive or dead of other cause	Dead (attributable to causes other than this cancer dx)	81	Diseases of Heart	One primary only	December	No/Unknown
4516984	2004	Male	75	White	Married (including common law)	Sigmoid Colon	8140/3: Adenocarcinoma, NOS	C18.7-Sigmoid colon	Moderately differentiated; Grade II	Blank(s)	IIIC	Blank(s)	Blank(s)	T3	Blank(s)	Blank(s)	N2	40	4 or more regional lymph nodes removed	Blank(s)	Blank(s)	50	400	3	300	3	24	4	998	No radiation and/or cancer-directed surgery	None	Alive or dead of other cause	Alive or dead due to cancer	111	Alive	One primary only	September	Yes
4517161	2005	Female	52	White	Single (never married)	Sigmoid Colon	8140/3: Adenocarcinoma, NOS	C18.7-Sigmoid colon	Moderately differentiated; Grade II	Blank(s)	IIIC	Blank(s)	Blank(s)	T3	Blank(s)	Blank(s)	N2	30	4 or more regional lymph nodes removed	Blank(s)	Blank(s)	40	450	3	200	3	13	4	998	No radiation and/or cancer-directed surgery	None	Dead (attributable to this cancer dx)	Alive or dead due to cancer	45	Colon excluding Rectum	One primary only	January	Yes
4517168	2005	Male	63	White	Married (including common law)	Ascending Colon	8140/3: Adenocarcinoma, NOS	C18.2-Ascending colon	Poorly differentiated; Grade III	Blank(s)	IIIC	Blank(s)	Blank(s)	T3	Blank(s)	Blank(s)	N2	80	4 or more regional lymph nodes removed	Blank(s)	Blank(s)	50	450	3	100	3	16	13	20	No radiation and/or cancer-directed surgery	None	Dead (attributable to this cancer dx)	Alive or dead due to cancer	19	Colon excluding Rectum	One primary only	January	Yes
4517265	2005	Female	49	White	Divorced	Descending Colon	8140/3: Adenocarcinoma, NOS	C18.6-Descending colon	Moderately differentiated; Grade II	Blank(s)	IIA	Blank(s)	Blank(s)	T3	Blank(s)	Blank(s)	N0	40	4 or more regional lymph nodes removed	Blank(s)	Blank(s)	35	400	3	0	3	14	0	998	No radiation and/or cancer-directed surgery	None	Alive or dead of other cause	Alive or dead due to cancer	107	Alive	One primary only	January	No/Unknown
4517290	2005	Female	73	White	Married (including common law)	Hepatic Flexure	8140/3: Adenocarcinoma, NOS	C18.3-Hepatic flexure of colon	Poorly differentiated; Grade III	Blank(s)	I	Blank(s)	Blank(s)	T2	Blank(s)	Blank(s)	N0	40	4 or more regional lymph nodes removed	Blank(s)	Blank(s)	35	200	3	0	3	16	0	20	No radiation and/or cancer-directed surgery	None	Alive or dead of other cause	Alive or dead due to cancer	105	Alive	One primary only	March	No/Unknown
4517310	2005	Female	54	White	Married (including common law)	Descending Colon	8140/3: Adenocarcinoma, NOS	C18.6-Descending colon	Moderately differentiated; Grade II	Blank(s)	IIB	Blank(s)	Blank(s)	T4	Blank(s)	Blank(s)	N0	40	4 or more regional lymph nodes removed	Blank(s)	Blank(s)	60	500	3	0	3	17	0	20	No radiation and/or cancer-directed surgery	None	Alive or dead of other cause	Alive or dead due to cancer	105	Alive	One primary only	March	No/Unknown
4517448	2005	Female	64	White	Married (including common law)	Ascending Colon	8140/3: Adenocarcinoma, NOS	C18.2-Ascending colon	Moderately differentiated; Grade II	Blank(s)	IIA	Blank(s)	Blank(s)	T3	Blank(s)	Blank(s)	N0	40	4 or more regional lymph nodes removed	Blank(s)	Blank(s)	60	400	3	0	3	12	0	999	No radiation and/or cancer-directed surgery	None	Alive or dead of other cause	Alive or dead due to cancer	107	Alive	One primary only	January	No/Unknown
4517535	2005	Male	56	White	Single (never married)	Transverse Colon	8140/3: Adenocarcinoma, NOS	C18.4-Transverse colon	Moderately differentiated; Grade II	Blank(s)	IIA	Blank(s)	Blank(s)	T3	Blank(s)	Blank(s)	N0	30	4 or more regional lymph nodes removed	Blank(s)	Blank(s)	45	400	3	0	3	8	0	999	No radiation and/or cancer-directed surgery	None	Alive or dead of other cause	Dead (attributable to causes other than this cancer dx)	20	Symptoms, Signs and Ill-Defined Conditions	One primary only	July	No/Unknown
4517547	2005	Male	78	Asian or Pacific Islander	Married (including common law)	Sigmoid Colon	8140/3: Adenocarcinoma, NOS	C18.7-Sigmoid colon	Moderately differentiated; Grade II	Blank(s)	IIB	Blank(s)	Blank(s)	T4	Blank(s)	Blank(s)	N0	30	4 or more regional lymph nodes removed	Blank(s)	Blank(s)	50	500	3	0	3	7	0	20	No radiation and/or cancer-directed surgery	None	Alive or dead of other cause	Alive or dead due to cancer	105	Alive	One primary only	March	Yes
4517556	2005	Female	70	White	Married (including common law)	Rectum	8140/3: Adenocarcinoma, NOS	C20.9-Rectum, NOS	Moderately differentiated; Grade II	Blank(s)	IIA	Blank(s)	Blank(s)	T3	Blank(s)	Blank(s)	N0	50	4 or more regional lymph nodes removed	Blank(s)	Blank(s)	25	450	5	0	6	6	0	999	Radiation prior to surgery	Beam radiation	Dead (attributable to this cancer dx)	Alive or dead due to cancer	19	Rectum and Rectosigmoid Junction	One primary only	March	Yes
4517560	2005	Male	47	Asian or Pacific Islander	Divorced	Rectum	8140/3: Adenocarcinoma, NOS	C20.9-Rectum, NOS	Moderately differentiated; Grade II	Blank(s)	IIB	Blank(s)	Blank(s)	T4	Blank(s)	Blank(s)	N0	0	None	Blank(s)	Blank(s)	50	610	1	0	1	0	98	999	No radiation and/or cancer-directed surgery	Beam radiation	Dead (attributable to this cancer dx)	Alive or dead due to cancer	7	Rectum and Rectosigmoid Junction	One primary only	May	Yes
4517745	2005	Male	63	White	Married (including common law)	Rectosigmoid Junction	8140/3: Adenocarcinoma, NOS	C19.9-Rectosigmoid junction	Moderately differentiated; Grade II	Blank(s)	IIA	Blank(s)	Blank(s)	T3	Blank(s)	Blank(s)	N0	30	1 to 3 regional lymph nodes removed	Blank(s)	Blank(s)	35	450	3	0	3	3	0	10	No radiation and/or cancer-directed surgery	None	Alive or dead of other cause	Alive or dead due to cancer	106	Alive	One primary only	February	Yes
4517756	2005	Female	79	White	Widowed	Sigmoid Colon	8480/3: Mucinous adenocarcinoma	C18.7-Sigmoid colon	Moderately differentiated; Grade II	Blank(s)	IIIB	Blank(s)	Blank(s)	T3	Blank(s)	Blank(s)	N1	30	4 or more regional lymph nodes removed	Blank(s)	Blank(s)	45	450	3	300	3	4	1	20	No radiation and/or cancer-directed surgery	None	Dead (attributable to this cancer dx)	Alive or dead due to cancer	33	Colon excluding Rectum	One primary only	March	No/Unknown
4517762	2005	Female	75	White	Widowed	Hepatic Flexure	8140/3: Adenocarcinoma, NOS	C18.3-Hepatic flexure of colon	Moderately differentiated; Grade II	Blank(s)	IIIB	Blank(s)	Blank(s)	T3	Blank(s)	Blank(s)	N1	40	4 or more regional lymph nodes removed	Blank(s)	Blank(s)	50	450	3	300	3	11	1	20	No radiation and/or cancer-directed surgery	None	Dead (attributable to this cancer dx)	Alive or dead due to cancer	18	Colon excluding Rectum	One primary only	January	Yes
4517767	2005	Female	63	White	Single (never married)	Sigmoid Colon	8140/3: Adenocarcinoma, NOS	C18.7-Sigmoid colon	Poorly differentiated; Grade III	Blank(s)	I	Blank(s)	Blank(s)	T2	Blank(s)	Blank(s)	N0	30	4 or more regional lymph nodes removed	Blank(s)	Blank(s)	25	200	3	0	3	28	0	10	No radiation and/or cancer-directed surgery	None	Alive or dead of other cause	Alive or dead due to cancer	107	Alive	One primary only	January	No/Unknown
4517770	2005	Female	62	Black	Married (including common law)	Cecum	8140/3: Adenocarcinoma, NOS	C18.0-Cecum	Poorly differentiated; Grade III	Blank(s)	IIB	Blank(s)	Blank(s)	T4	Blank(s)	Blank(s)	N0	41	4 or more regional lymph nodes removed	Blank(s)	Blank(s)	60	600	3	0	3	48	0	10	No radiation and/or cancer-directed surgery	None	Alive or dead of other cause	Alive or dead due to cancer	107	Alive	One primary only	January	Yes
4517771	2005	Female	78	White	Married (including common law)	Splenic Flexure	8140/3: Adenocarcinoma, NOS	C18.5-Splenic flexure of colon	Moderately differentiated; Grade II	Blank(s)	IIA	Blank(s)	Blank(s)	T3	Blank(s)	Blank(s)	N0	30	4 or more regional lymph nodes removed	Blank(s)	Blank(s)	60	450	3	0	3	37	0	20	No radiation and/or cancer-directed surgery	None	Dead (attributable to this cancer dx)	Alive or dead due to cancer	34	Colon excluding Rectum	One primary only	January	No/Unknown
4517807	2005	Female	56	Black	Unknown	Transverse Colon	8140/3: Adenocarcinoma, NOS	C18.4-Transverse colon	Moderately differentiated; Grade II	Blank(s)	IIIB	Blank(s)	Blank(s)	T3	Blank(s)	Blank(s)	N1	30	4 or more regional lymph nodes removed	Blank(s)	Blank(s)	18	450	3	100	3	11	1	999	No radiation and/or cancer-directed surgery	None	Alive or dead of other cause	Alive or dead due to cancer	105	Alive	One primary only	March	Yes
4517816	2005	Male	71	White	Married (including common law)	Ascending Colon	8481/3: Mucin-producing adenocarcinoma	C18.2-Ascending colon	Poorly differentiated; Grade III	Blank(s)	IIIC	Blank(s)	Blank(s)	T3	Blank(s)	Blank(s)	N2	40	4 or more regional lymph nodes removed	Blank(s)	Blank(s)	75	400	3	300	3	17	4	20	No radiation and/or cancer-directed surgery	None	Alive or dead of other cause	Alive or dead due to cancer	105	Alive	One primary only	March	Yes
4518008	2005	Female	68	Asian or Pacific Islander	Divorced	Transverse Colon	8140/3: Adenocarcinoma, NOS	C18.4-Transverse colon	Moderately differentiated; Grade II	Blank(s)	IIIB	Blank(s)	Blank(s)	T3	Blank(s)	Blank(s)	N1	30	4 or more regional lymph nodes removed	Blank(s)	Blank(s)	30	400	3	100	3	20	1	10	No radiation and/or cancer-directed surgery	None	Alive or dead of other cause	Alive or dead due to cancer	102	Alive	One primary only	June	Yes
4518034	2005	Male	62	Asian or Pacific Islander	Married (including common law)	Rectosigmoid Junction	8140/3: Adenocarcinoma, NOS	C19.9-Rectosigmoid junction	Moderately differentiated; Grade II	Blank(s)	IIA	Blank(s)	Blank(s)	T3	Blank(s)	Blank(s)	N0	30	4 or more regional lymph nodes removed	Blank(s)	Blank(s)	50	450	3	0	3	22	0	20	No radiation and/or cancer-directed surgery	None	Alive or dead of other cause	Alive or dead due to cancer	106	Alive	One primary only	February	No/Unknown
4518095	2005	Female	64	White	Married (including common law)	Cecum	8140/3: Adenocarcinoma, NOS	C18.0-Cecum	Well differentiated; Grade I	Blank(s)	IIIB	Blank(s)	Blank(s)	T3	Blank(s)	Blank(s)	N1	40	4 or more regional lymph nodes removed	Blank(s)	Blank(s)	65	450	3	100	3	10	1	10	No radiation and/or cancer-directed surgery	None	Alive or dead of other cause	Alive or dead due to cancer	107	Alive	One primary only	January	Yes
4518105	2005	Female	68	White	Married (including common law)	Cecum	8140/3: Adenocarcinoma, NOS	C18.0-Cecum	Moderately differentiated; Grade II	Blank(s)	IIA	Blank(s)	Blank(s)	T3	Blank(s)	Blank(s)	N0	40	4 or more regional lymph nodes removed	Blank(s)	Blank(s)	62	450	3	0	3	27	0	10	No radiation and/or cancer-directed surgery	None	Alive or dead of other cause	Dead (attributable to causes other than this cancer dx)	39	Suicide and Self-Inflicted Injury	One primary only	January	Yes
4518190	2005	Female	55	White	Divorced	Sigmoid Colon	8480/3: Mucinous adenocarcinoma	C18.7-Sigmoid colon	Moderately differentiated; Grade II	Blank(s)	IIIB	Blank(s)	Blank(s)	T3	Blank(s)	Blank(s)	N1	30	4 or more regional lymph nodes removed	Blank(s)	Blank(s)	42	450	3	100	3	14	2	20	No radiation and/or cancer-directed surgery	None	Alive or dead of other cause	Alive or dead due to cancer	107	Alive	One primary only	January	Yes
4518210	2005	Male	48	Asian or Pacific Islander	Married (including common law)	Rectum	8140/3: Adenocarcinoma, NOS	C20.9-Rectum, NOS	Poorly differentiated; Grade III	Blank(s)	IIIA	Blank(s)	Blank(s)	T2	Blank(s)	Blank(s)	N1	30	4 or more regional lymph nodes removed	Blank(s)	Blank(s)	22	200	3	300	3	18	2	20	Radiation after surgery	Beam radiation	Alive or dead of other cause	Alive or dead due to cancer	107	Alive	One primary only	January	Yes
4518272	2005	Male	65	White	Married (including common law)	Rectum	8481/3: Mucin-producing adenocarcinoma	C20.9-Rectum, NOS	Poorly differentiated; Grade III	Blank(s)	IIIB	Blank(s)	Blank(s)	T3	Blank(s)	Blank(s)	N1	30	4 or more regional lymph nodes removed	Blank(s)	Blank(s)	90	450	6	100	6	13	0	10	Radiation prior to surgery	Beam radiation	Alive or dead of other cause	Alive or dead due to cancer	106	Alive	One primary only	February	Yes
4518432	2005	Male	62	White	Married (including common law)	Rectum	8140/3: Adenocarcinoma, NOS	C20.9-Rectum, NOS	Moderately differentiated; Grade II	Blank(s)	I	Blank(s)	Blank(s)	T2	Blank(s)	Blank(s)	N0	30	4 or more regional lymph nodes removed	Blank(s)	Blank(s)	32	200	3	0	3	22	0	998	No radiation and/or cancer-directed surgery	None	Alive or dead of other cause	Alive or dead due to cancer	104	Alive	One primary only	April	No/Unknown
4518433	2005	Male	71	White	Married (including common law)	Rectum	8140/3: Adenocarcinoma, NOS	C20.9-Rectum, NOS	Poorly differentiated; Grade III	Blank(s)	IIA	Blank(s)	Blank(s)	T3	Blank(s)	Blank(s)	N0	50	None	Blank(s)	Blank(s)	20	450	3	0	0	0	98	10	Radiation prior to surgery	Beam radiation	Dead (attributable to this cancer dx)	Alive or dead due to cancer	38	Colon excluding Rectum	One primary only	April	Yes
4518547	2005	Male	54	Asian or Pacific Islander	Married (including common law)	Rectosigmoid Junction	8481/3: Mucin-producing adenocarcinoma	C19.9-Rectosigmoid junction	Moderately differentiated; Grade II	Blank(s)	IIIB	Blank(s)	Blank(s)	T4	Blank(s)	Blank(s)	N1	30	4 or more regional lymph nodes removed	Blank(s)	Blank(s)	50	610	3	100	3	14	3	20	Radiation after surgery	Beam radiation	Dead (attributable to this cancer dx)	Alive or dead due to cancer	30	Rectum and Rectosigmoid Junction	One primary only	March	Yes
4518556	2005	Female	39	White	Married (including common law)	Rectum	8140/3: Adenocarcinoma, NOS	C20.9-Rectum, NOS	Moderately differentiated; Grade II	Blank(s)	I	Blank(s)	Blank(s)	T2	Blank(s)	Blank(s)	N0	30	4 or more regional lymph nodes removed	Blank(s)	Blank(s)	65	200	3	0	3	31	0	10	No radiation and/or cancer-directed surgery	None	Alive or dead of other cause	Alive or dead due to cancer	103	Alive	One primary only	May	No/Unknown
4518622	2005	Male	47	White	Married (including common law)	Sigmoid Colon	8140/3: Adenocarcinoma, NOS	C18.7-Sigmoid colon	Moderately differentiated; Grade II	Blank(s)	IIIB	Blank(s)	Blank(s)	T4	Blank(s)	Blank(s)	N1	30	4 or more regional lymph nodes removed	Blank(s)	Blank(s)	140	550	3	300	3	7	1	998	No radiation and/or cancer-directed surgery	None	Alive or dead of other cause	Alive or dead due to cancer	102	Alive	One primary only	June	No/Unknown
4518644	2005	Male	53	White	Married (including common law)	Cecum	8140/3: Adenocarcinoma, NOS	C18.0-Cecum	Moderately differentiated; Grade II	Blank(s)	IIA	Blank(s)	Blank(s)	T3	Blank(s)	Blank(s)	N0	30	4 or more regional lymph nodes removed	Blank(s)	Blank(s)	30	400	3	0	3	23	0	998	No radiation and/or cancer-directed surgery	None	Alive or dead of other cause	Alive or dead due to cancer	106	Alive	One primary only	February	No/Unknown
4518705	2005	Male	79	White	Married (including common law)	Rectosigmoid Junction	8140/3: Adenocarcinoma, NOS	C19.9-Rectosigmoid junction	Moderately differentiated; Grade II	Blank(s)	IIA	Blank(s)	Blank(s)	T3	Blank(s)	Blank(s)	N0	30	4 or more regional lymph nodes removed	Blank(s)	Blank(s)	35	450	3	0	3	17	0	998	No radiation and/or cancer-directed surgery	None	Alive or dead of other cause	Alive or dead due to cancer	103	Alive	One primary only	May	No/Unknown
4518709	2005	Female	58	Asian or Pacific Islander	Married (including common law)	Rectosigmoid Junction	8140/3: Adenocarcinoma, NOS	C19.9-Rectosigmoid junction	Moderately differentiated; Grade II	Blank(s)	IIIB	Blank(s)	Blank(s)	T3	Blank(s)	Blank(s)	N1	30	4 or more regional lymph nodes removed	Blank(s)	Blank(s)	50	400	3	300	3	20	3	20	Radiation after surgery	Beam radiation	Dead (attributable to this cancer dx)	Alive or dead due to cancer	39	Lung and Bronchus	One primary only	March	Yes
4518721	2005	Female	66	White	Married (including common law)	Rectum	8140/3: Adenocarcinoma, NOS	C20.9-Rectum, NOS	Moderately differentiated; Grade II	Blank(s)	I	Blank(s)	Blank(s)	T1	Blank(s)	Blank(s)	N0	30	4 or more regional lymph nodes removed	Blank(s)	Blank(s)	8	300	6	0	6	10	0	20	Radiation prior to surgery	Beam radiation	Alive or dead of other cause	Alive or dead due to cancer	105	Alive	One primary only	April	Yes
4518805	2005	Female	46	White	Married (including common law)	Rectosigmoid Junction	8140/3: Adenocarcinoma, NOS	C19.9-Rectosigmoid junction	Moderately differentiated; Grade II	Blank(s)	IIA	Blank(s)	Blank(s)	T3	Blank(s)	Blank(s)	N0	30	4 or more regional lymph nodes removed	Blank(s)	Blank(s)	40	400	5	0	5	9	0	20	Radiation prior to surgery	Beam radiation	Alive or dead of other cause	Alive or dead due to cancer	103	Alive	One primary only	May	Yes
4518825	2005	Female	55	White	Married (including common law)	Sigmoid Colon	8140/3: Adenocarcinoma, NOS	C18.7-Sigmoid colon	Moderately differentiated; Grade II	Blank(s)	IIIB	Blank(s)	Blank(s)	T3	Blank(s)	Blank(s)	N1	30	4 or more regional lymph nodes removed	Blank(s)	Blank(s)	45	400	3	300	3	7	2	20	No radiation and/or cancer-directed surgery	None	Alive or dead of other cause	Alive or dead due to cancer	102	Alive	One primary only	June	No/Unknown
4518846	2005	Male	78	White	Married (including common law)	Rectum	8140/3: Adenocarcinoma, NOS	C20.9-Rectum, NOS	Moderately differentiated; Grade II	Blank(s)	IIA	Blank(s)	Blank(s)	T3	Blank(s)	Blank(s)	N0	50	4 or more regional lymph nodes removed	Blank(s)	Blank(s)	999	450	5	0	6	8	0	999	Radiation prior to surgery	Beam radiation	Alive or dead of other cause	Alive or dead due to cancer	101	Alive	One primary only	July	Yes
4518855	2005	Female	38	White	Divorced	Rectum	8140/3: Adenocarcinoma, NOS	C20.9-Rectum, NOS	Poorly differentiated; Grade III	Blank(s)	IIA	Blank(s)	Blank(s)	T3	Blank(s)	Blank(s)	N0	30	4 or more regional lymph nodes removed	Blank(s)	Blank(s)	999	400	6	0	6	16	0	20	Radiation prior to surgery	Beam radiation	Alive or dead of other cause	Alive or dead due to cancer	102	Alive	One primary only	June	Yes
4518866	2005	Female	80	White	Widowed	Sigmoid Colon	8140/3: Adenocarcinoma, NOS	C18.7-Sigmoid colon	Moderately differentiated; Grade II	Blank(s)	IIA	Blank(s)	Blank(s)	T3	Blank(s)	Blank(s)	N0	30	1 to 3 regional lymph nodes removed	Blank(s)	Blank(s)	75	460	3	0	3	2	0	998	No radiation and/or cancer-directed surgery	None	Dead (attributable to this cancer dx)	Alive or dead due to cancer	2	Colon excluding Rectum	One primary only	February	No/Unknown
4519043	2005	Male	77	White	Divorced	Sigmoid Colon	8140/3: Adenocarcinoma, NOS	C18.7-Sigmoid colon	Moderately differentiated; Grade II	Blank(s)	I	Blank(s)	Blank(s)	T1	Blank(s)	Blank(s)	N0	30	4 or more regional lymph nodes removed	Blank(s)	Blank(s)	15	160	3	0	3	15	0	20	No radiation and/or cancer-directed surgery	None	Alive or dead of other cause	Alive or dead due to cancer	106	Alive	One primary only	February	No/Unknown
4519104	2005	Male	58	Asian or Pacific Islander	Married (including common law)	Large Intestine, NOS	8140/3: Adenocarcinoma, NOS	C18.8-Overlapping lesion of colon	Moderately differentiated; Grade II	Blank(s)	IIIC	Blank(s)	Blank(s)	T3	Blank(s)	Blank(s)	N2	40	4 or more regional lymph nodes removed	Blank(s)	Blank(s)	40	450	3	300	3	13	8	10	No radiation and/or cancer-directed surgery	None	Dead (attributable to this cancer dx)	Alive or dead due to cancer	2	Colon excluding Rectum	One primary only	May	No/Unknown
4519305	2005	Female	49	Black	Single (never married)	Descending Colon	8140/3: Adenocarcinoma, NOS	C18.6-Descending colon	Moderately differentiated; Grade II	Blank(s)	IIIC	Blank(s)	Blank(s)	T3	Blank(s)	Blank(s)	N2	40	4 or more regional lymph nodes removed	Blank(s)	Blank(s)	65	450	3	300	3	23	9	999	No radiation and/or cancer-directed surgery	None	Dead (attributable to this cancer dx)	Alive or dead due to cancer	18	Colon excluding Rectum	One primary only	January	Yes
4519509	2005	Male	67	White	Married (including common law)	Rectum	8140/3: Adenocarcinoma, NOS	C20.9-Rectum, NOS	Moderately differentiated; Grade II	Blank(s)	IIA	Blank(s)	Blank(s)	T3	Blank(s)	Blank(s)	N0	30	4 or more regional lymph nodes removed	Blank(s)	Blank(s)	50	400	3	0	3	4	0	20	No radiation and/or cancer-directed surgery	None	Alive or dead of other cause	Alive or dead due to cancer	106	Alive	One primary only	February	No/Unknown
4519512	2005	Male	57	White	Married (including common law)	Rectum	8140/3: Adenocarcinoma, NOS	C20.9-Rectum, NOS	Moderately differentiated; Grade II	Blank(s)	IIIB	Blank(s)	Blank(s)	T3	Blank(s)	Blank(s)	N1	30	4 or more regional lymph nodes removed	Blank(s)	Blank(s)	70	400	3	300	3	14	1	20	Radiation after surgery	Beam radiation	Alive or dead of other cause	Alive or dead due to cancer	102	Alive	One primary only	June	Yes
4519602	2005	Female	65	Black	Widowed	Sigmoid Colon	8140/3: Adenocarcinoma, NOS	C18.7-Sigmoid colon	Moderately differentiated; Grade II	Blank(s)	IIIB	Blank(s)	Blank(s)	T3	Blank(s)	Blank(s)	N1	30	4 or more regional lymph nodes removed	Blank(s)	Blank(s)	35	400	3	300	3	16	1	20	No radiation and/or cancer-directed surgery	None	Alive or dead of other cause	Alive or dead due to cancer	104	Alive	One primary only	April	Yes
4519608	2005	Male	59	White	Married (including common law)	Transverse Colon	8140/3: Adenocarcinoma, NOS	C18.4-Transverse colon	Moderately differentiated; Grade II	Blank(s)	I	Blank(s)	Blank(s)	T2	Blank(s)	Blank(s)	N0	40	4 or more regional lymph nodes removed	Blank(s)	Blank(s)	35	200	3	0	3	11	0	999	No radiation and/or cancer-directed surgery	None	Alive or dead of other cause	Alive or dead due to cancer	105	Alive	One primary only	March	No/Unknown
4519612	2005	Female	62	White	Widowed	Cecum	8140/3: Adenocarcinoma, NOS	C18.0-Cecum	Moderately differentiated; Grade II	Blank(s)	I	Blank(s)	Blank(s)	T2	Blank(s)	Blank(s)	N0	40	4 or more regional lymph nodes removed	Blank(s)	Blank(s)	15	200	3	0	3	17	0	20	No radiation and/or cancer-directed surgery	None	Alive or dead of other cause	Alive or dead due to cancer	104	Alive	One primary only	April	No/Unknown
4519691	2005	Male	50	White	Married (including common law)	Sigmoid Colon	8140/3: Adenocarcinoma, NOS	C18.7-Sigmoid colon	Moderately differentiated; Grade II	Blank(s)	IIA	Blank(s)	Blank(s)	T3	Blank(s)	Blank(s)	N0	30	4 or more regional lymph nodes removed	Blank(s)	Blank(s)	33	450	3	0	3	15	0	20	No radiation and/or cancer-directed surgery	None	Alive or dead of other cause	Alive or dead due to cancer	107	Alive	One primary only	January	No/Unknown
4519719	2005	Male	64	Asian or Pacific Islander	Married (including common law)	Sigmoid Colon	8140/3: Adenocarcinoma, NOS	C18.7-Sigmoid colon	Poorly differentiated; Grade III	Blank(s)	IIIB	Blank(s)	Blank(s)	T3	Blank(s)	Blank(s)	N1	30	1 to 3 regional lymph nodes removed	Blank(s)	Blank(s)	35	450	3	300	3	2	1	10	No radiation and/or cancer-directed surgery	None	Alive or dead of other cause	Alive or dead due to cancer	106	Alive	One primary only	February	Yes
4519742	2005	Female	74	White	Married (including common law)	Splenic Flexure	8140/3: Adenocarcinoma, NOS	C18.5-Splenic flexure of colon	Moderately differentiated; Grade II	Blank(s)	I	Blank(s)	Blank(s)	T2	Blank(s)	Blank(s)	N0	30	4 or more regional lymph nodes removed	Blank(s)	Blank(s)	30	200	3	0	3	10	0	998	No radiation and/or cancer-directed surgery	None	Dead (attributable to this cancer dx)	Alive or dead due to cancer	7	Lung and Bronchus	One primary only	May	No/Unknown
4519743	2005	Female	59	Black	Married (including common law)	Rectum	8140/3: Adenocarcinoma, NOS	C20.9-Rectum, NOS	Moderately differentiated; Grade II	Blank(s)	IIIB	Blank(s)	Blank(s)	T3	Blank(s)	Blank(s)	N1	50	1 to 3 regional lymph nodes removed	Blank(s)	Blank(s)	30	400	3	300	3	11	2	998	Radiation after surgery	Beam radiation	Alive or dead of other cause	Dead (attributable to causes other than this cancer dx)	66	Chronic Obstructive Pulmonary Disease and Allied Cond	One primary only	April	Yes
4519751	2005	Male	63	White	Married (including common law)	Cecum	8140/3: Adenocarcinoma, NOS	C18.0-Cecum	Poorly differentiated; Grade III	Blank(s)	IIIC	Blank(s)	Blank(s)	T3	Blank(s)	Blank(s)	N2	40	4 or more regional lymph nodes removed	Blank(s)	Blank(s)	45	450	3	300	3	9	6	20	No radiation and/or cancer-directed surgery	None	Dead (attributable to this cancer dx)	Alive or dead due to cancer	52	Colon excluding Rectum	One primary only	May	Yes
4519756	2005	Female	70	White	Widowed	Cecum	8140/3: Adenocarcinoma, NOS	C18.0-Cecum	Moderately differentiated; Grade II	Blank(s)	I	Blank(s)	Blank(s)	T2	Blank(s)	Blank(s)	N0	40	4 or more regional lymph nodes removed	Blank(s)	Blank(s)	30	200	3	0	3	15	0	20	No radiation and/or cancer-directed surgery	None	Alive or dead of other cause	Alive or dead due to cancer	105	Alive	One primary only	March	No/Unknown
4519814	2005	Male	58	White	Divorced	Transverse Colon	8140/3: Adenocarcinoma, NOS	C18.4-Transverse colon	Poorly differentiated; Grade III	Blank(s)	IIIB	Blank(s)	Blank(s)	T4	Blank(s)	Blank(s)	N1	40	4 or more regional lymph nodes removed	Blank(s)	Blank(s)	37	500	3	300	3	17	3	10	No radiation and/or cancer-directed surgery	None	Dead (attributable to this cancer dx)	Alive or dead due to cancer	7	Colon excluding Rectum	One primary only	January	Yes
4519816	2005	Female	62	White	Married (including common law)	Sigmoid Colon	8480/3: Mucinous adenocarcinoma	C18.7-Sigmoid colon	Moderately differentiated; Grade II	Blank(s)	IIA	Blank(s)	Blank(s)	T3	Blank(s)	Blank(s)	N0	30	4 or more regional lymph nodes removed	Blank(s)	Blank(s)	42	450	3	0	3	14	0	20	No radiation and/or cancer-directed surgery	None	Alive or dead of other cause	Alive or dead due to cancer	107	Alive	One primary only	January	No/Unknown
4519829	2005	Female	46	White	Single (never married)	Ascending Colon	8140/3: Adenocarcinoma, NOS	C18.2-Ascending colon	Moderately differentiated; Grade II	Blank(s)	IIIC	Blank(s)	Blank(s)	T3	Blank(s)	Blank(s)	N2	40	4 or more regional lymph nodes removed	Blank(s)	Blank(s)	47	450	3	300	3	29	5	20	No radiation and/or cancer-directed surgery	None	Dead (attributable to this cancer dx)	Alive or dead due to cancer	16	Colon excluding Rectum	One primary only	March	No/Unknown
4519900	2005	Male	69	Asian or Pacific Islander	Married (including common law)	Ascending Colon	8140/3: Adenocarcinoma, NOS	C18.2-Ascending colon	Moderately differentiated; Grade II	Blank(s)	IIIB	Blank(s)	Blank(s)	T4	Blank(s)	Blank(s)	N1	40	4 or more regional lymph nodes removed	Blank(s)	Blank(s)	70	600	3	100	3	24	1	998	No radiation and/or cancer-directed surgery	None	Alive or dead of other cause	Alive or dead due to cancer	107	Alive	One primary only	January	No/Unknown
4519914	2005	Male	73	Asian or Pacific Islander	Widowed	Ascending Colon	8140/3: Adenocarcinoma, NOS	C18.2-Ascending colon	Poorly differentiated; Grade III	Blank(s)	I	Blank(s)	Blank(s)	T1	Blank(s)	Blank(s)	N0	40	4 or more regional lymph nodes removed	Blank(s)	Blank(s)	13	160	3	0	3	4	0	998	No radiation and/or cancer-directed surgery	None	Alive or dead of other cause	Alive or dead due to cancer	107	Alive	One primary only	January	No/Unknown
4519981	2005	Male	56	White	Married (including common law)	Ascending Colon	8140/3: Adenocarcinoma, NOS	C18.2-Ascending colon	Poorly differentiated; Grade III	Blank(s)	IIIC	Blank(s)	Blank(s)	T3	Blank(s)	Blank(s)	N2	40	4 or more regional lymph nodes removed	Blank(s)	Blank(s)	50	450	3	300	3	20	13	999	No radiation and/or cancer-directed surgery	None	Dead (attributable to this cancer dx)	Alive or dead due to cancer	51	Colon excluding Rectum	One primary only	March	Yes
4520023	2005	Female	70	White	Divorced	Rectum	8140/3: Adenocarcinoma, NOS	C20.9-Rectum, NOS	Moderately differentiated; Grade II	Blank(s)	IIA	Blank(s)	Blank(s)	T3	Blank(s)	Blank(s)	N0	30	4 or more regional lymph nodes removed	Blank(s)	Blank(s)	999	450	5	0	6	5	0	20	Radiation prior to surgery	Beam radiation	Dead (attributable to this cancer dx)	Alive or dead due to cancer	41	Pancreas	One primary only	June	Yes
4520091	2005	Female	65	White	Divorced	Cecum	8140/3: Adenocarcinoma, NOS	C18.0-Cecum	Moderately differentiated; Grade II	Blank(s)	IIB	Blank(s)	Blank(s)	T4	Blank(s)	Blank(s)	N0	40	4 or more regional lymph nodes removed	Blank(s)	Blank(s)	65	650	3	0	3	23	0	10	No radiation and/or cancer-directed surgery	None	Alive or dead of other cause	Alive or dead due to cancer	106	Alive	One primary only	February	Yes
4520167	2005	Male	76	White	Married (including common law)	Ascending Colon	8140/3: Adenocarcinoma, NOS	C18.2-Ascending colon	Moderately differentiated; Grade II	Blank(s)	IIA	Blank(s)	Blank(s)	T3	Blank(s)	Blank(s)	N0	40	4 or more regional lymph nodes removed	Blank(s)	Blank(s)	20	400	3	0	3	8	0	20	No radiation and/or cancer-directed surgery	None	Alive or dead of other cause	Alive or dead due to cancer	105	Alive	One primary only	March	No/Unknown
4520219	2005	Male	48	White	Married (including common law)	Ascending Colon	8140/3: Adenocarcinoma, NOS	C18.2-Ascending colon	Moderately differentiated; Grade II	Blank(s)	IIIB	Blank(s)	Blank(s)	T3	Blank(s)	Blank(s)	N1	40	4 or more regional lymph nodes removed	Blank(s)	Blank(s)	999	450	3	100	3	24	1	10	No radiation and/or cancer-directed surgery	None	Alive or dead of other cause	Alive or dead due to cancer	102	Alive	One primary only	June	Yes
4520228	2005	Female	80	White	Widowed	Cecum	8481/3: Mucin-producing adenocarcinoma	C18.0-Cecum	Moderately differentiated; Grade II	Blank(s)	IIA	Blank(s)	Blank(s)	T3	Blank(s)	Blank(s)	N0	40	4 or more regional lymph nodes removed	Blank(s)	Blank(s)	25	400	3	0	3	11	0	998	No radiation and/or cancer-directed surgery	None	Alive or dead of other cause	Alive or dead due to cancer	104	Alive	One primary only	April	No/Unknown
4520231	2005	Male	69	White	Married (including common law)	Sigmoid Colon	8140/3: Adenocarcinoma, NOS	C18.7-Sigmoid colon	Moderately differentiated; Grade II	Blank(s)	IIIA	Blank(s)	Blank(s)	T2	Blank(s)	Blank(s)	N1	30	4 or more regional lymph nodes removed	Blank(s)	Blank(s)	24	200	3	100	3	8	3	998	No radiation and/or cancer-directed surgery	None	Alive or dead of other cause	Alive or dead due to cancer	104	Alive	One primary only	April	No/Unknown
4520233	2005	Female	57	White	Married (including common law)	Sigmoid Colon	8140/3: Adenocarcinoma, NOS	C18.7-Sigmoid colon	Moderately differentiated; Grade II	Blank(s)	IIA	Blank(s)	Blank(s)	T3	Blank(s)	Blank(s)	N0	30	4 or more regional lymph nodes removed	Blank(s)	Blank(s)	50	400	3	0	3	12	0	998	No radiation and/or cancer-directed surgery	None	Alive or dead of other cause	Alive or dead due to cancer	106	Alive	One primary only	March	No/Unknown
4520330	2005	Male	59	Asian or Pacific Islander	Married (including common law)	Rectum	8140/3: Adenocarcinoma, NOS	C20.9-Rectum, NOS	Moderately differentiated; Grade II	Blank(s)	IIA	Blank(s)	Blank(s)	T3	Blank(s)	Blank(s)	N0	30	4 or more regional lymph nodes removed	Blank(s)	Blank(s)	55	450	3	0	3	9	0	20	Radiation after surgery	Beam radiation	Alive or dead of other cause	Alive or dead due to cancer	104	Alive	One primary only	April	Yes
4520384	2005	Female	79	Black	Married (including common law)	Cecum	8140/3: Adenocarcinoma, NOS	C18.0-Cecum	Moderately differentiated; Grade II	Blank(s)	I	Blank(s)	Blank(s)	T1	Blank(s)	Blank(s)	N0	40	4 or more regional lymph nodes removed	Blank(s)	Blank(s)	16	160	3	0	3	15	0	20	No radiation and/or cancer-directed surgery	None	Alive or dead of other cause	Dead (attributable to causes other than this cancer dx)	5	Diseases of Heart	One primary only	January	No/Unknown
4520385	2005	Male	76	White	Married (including common law)	Ascending Colon	8140/3: Adenocarcinoma, NOS	C18.2-Ascending colon	Moderately differentiated; Grade II	Blank(s)	IIA	Blank(s)	Blank(s)	T3	Blank(s)	Blank(s)	N0	40	4 or more regional lymph nodes removed	Blank(s)	Blank(s)	29	400	3	0	3	21	0	998	No radiation and/or cancer-directed surgery	None	Alive or dead of other cause	Alive or dead due to cancer	107	Alive	One primary only	January	No/Unknown
4520403	2005	Male	77	Asian or Pacific Islander	Divorced	Sigmoid Colon	8140/3: Adenocarcinoma, NOS	C18.7-Sigmoid colon	Moderately differentiated; Grade II	Blank(s)	IIA	Blank(s)	Blank(s)	T3	Blank(s)	Blank(s)	N0	30	4 or more regional lymph nodes removed	Blank(s)	Blank(s)	999	450	3	0	3	13	0	10	No radiation and/or cancer-directed surgery	None	Alive or dead of other cause	Dead (attributable to causes other than this cancer dx)	95	Septicemia	One primary only	January	No/Unknown
4520421	2005	Male	70	White	Married (including common law)	Splenic Flexure	8140/3: Adenocarcinoma, NOS	C18.5-Splenic flexure of colon	Moderately differentiated; Grade II	Blank(s)	IIA	Blank(s)	Blank(s)	T3	Blank(s)	Blank(s)	N0	40	4 or more regional lymph nodes removed	Blank(s)	Blank(s)	35	400	3	0	3	11	0	998	No radiation and/or cancer-directed surgery	None	Alive or dead of other cause	Dead (attributable to causes other than this cancer dx)	74	Chronic Obstructive Pulmonary Disease and Allied Cond	One primary only	February	No/Unknown
4520443	2005	Male	76	Asian or Pacific Islander	Married (including common law)	Sigmoid Colon	8140/3: Adenocarcinoma, NOS	C18.7-Sigmoid colon	Moderately differentiated; Grade II	Blank(s)	IIA	Blank(s)	Blank(s)	T3	Blank(s)	Blank(s)	N0	30	4 or more regional lymph nodes removed	Blank(s)	Blank(s)	50	450	3	0	3	14	0	20	No radiation and/or cancer-directed surgery	None	Alive or dead of other cause	Alive or dead due to cancer	102	Alive	One primary only	June	No/Unknown
4520447	2005	Male	68	White	Widowed	Cecum	8140/3: Adenocarcinoma, NOS	C18.0-Cecum	Moderately differentiated; Grade II	Blank(s)	I	Blank(s)	Blank(s)	T1	Blank(s)	Blank(s)	N0	40	1 to 3 regional lymph nodes removed	Blank(s)	Blank(s)	5	160	3	0	3	1	0	10	No radiation and/or cancer-directed surgery	None	Dead (attributable to this cancer dx)	Alive or dead due to cancer	18	Colon excluding Rectum	One primary only	May	No/Unknown
4520462	2005	Female	68	White	Married (including common law)	Cecum	8140/3: Adenocarcinoma, NOS	C18.0-Cecum	Moderately differentiated; Grade II	Blank(s)	I	Blank(s)	Blank(s)	T1	Blank(s)	Blank(s)	N0	30	4 or more regional lymph nodes removed	Blank(s)	Blank(s)	37	160	3	0	3	13	0	998	No radiation and/or cancer-directed surgery	None	Alive or dead of other cause	Alive or dead due to cancer	105	Alive	One primary only	March	No/Unknown
4520471	2005	Male	79	White	Married (including common law)	Ascending Colon	8140/3: Adenocarcinoma, NOS	C18.2-Ascending colon	Moderately differentiated; Grade II	Blank(s)	IIA	Blank(s)	Blank(s)	T3	Blank(s)	Blank(s)	N0	40	4 or more regional lymph nodes removed	Blank(s)	Blank(s)	60	400	3	0	3	13	0	20	No radiation and/or cancer-directed surgery	None	Alive or dead of other cause	Alive or dead due to cancer	105	Alive	One primary only	April	No/Unknown
4520477	2005	Female	79	White	Married (including common law)	Ascending Colon	8140/3: Adenocarcinoma, NOS	C18.2-Ascending colon	Moderately differentiated; Grade II	Blank(s)	I	Blank(s)	Blank(s)	T1	Blank(s)	Blank(s)	N0	40	4 or more regional lymph nodes removed	Blank(s)	Blank(s)	24	160	3	0	3	4	0	20	No radiation and/or cancer-directed surgery	None	Dead (attributable to this cancer dx)	Alive or dead due to cancer	1	Colon excluding Rectum	One primary only	May	No/Unknown
4520483	2005	Male	78	White	Single (never married)	Ascending Colon	8140/3: Adenocarcinoma, NOS	C18.2-Ascending colon	Moderately differentiated; Grade II	Blank(s)	IIIB	Blank(s)	Blank(s)	T3	Blank(s)	Blank(s)	N1	30	4 or more regional lymph nodes removed	Blank(s)	Blank(s)	55	400	3	300	3	8	1	20	No radiation and/or cancer-directed surgery	None	Alive or dead of other cause	Dead (attributable to causes other than this cancer dx)	52	Other Infectious and Parasitic Diseases including HIV	One primary only	August	Yes
4520496	2005	Female	50	White	Married (including common law)	Descending Colon	8140/3: Adenocarcinoma, NOS	C18.6-Descending colon	Moderately differentiated; Grade II	Blank(s)	IIIC	Blank(s)	Blank(s)	T3	Blank(s)	Blank(s)	N2	30	4 or more regional lymph nodes removed	Blank(s)	Blank(s)	30	450	3	300	3	8	5	10	No radiation and/or cancer-directed surgery	None	Alive or dead of other cause	Alive or dead due to cancer	100	Alive	One primary only	August	Yes
4520519	2005	Male	56	White	Single (never married)	Rectum	8140/3: Adenocarcinoma, NOS	C20.9-Rectum, NOS	Moderately differentiated; Grade II	Blank(s)	IIB	Blank(s)	Blank(s)	T4	Blank(s)	Blank(s)	N0	50	4 or more regional lymph nodes removed	Blank(s)	Blank(s)	15	610	3	0	3	5	0	998	Radiation prior to surgery	Radiation, NOS method or source not specified	Alive or dead of other cause	Alive or dead due to cancer	105	Alive	One primary only	March	Yes
4520529	2005	Male	65	White	Married (including common law)	Rectum	8140/3: Adenocarcinoma, NOS	C20.9-Rectum, NOS	Moderately differentiated; Grade II	Blank(s)	I	Blank(s)	Blank(s)	T2	Blank(s)	Blank(s)	N0	30	4 or more regional lymph nodes removed	Blank(s)	Blank(s)	20	200	3	0	3	9	0	998	Radiation after surgery	Beam radiation	Alive or dead of other cause	Alive or dead due to cancer	100	Alive	One primary only	August	Yes
4520570	2005	Female	67	White	Single (never married)	Sigmoid Colon	8480/3: Mucinous adenocarcinoma	C18.7-Sigmoid colon	Moderately differentiated; Grade II	Blank(s)	IIB	Blank(s)	Blank(s)	T4	Blank(s)	Blank(s)	N0	30	4 or more regional lymph nodes removed	Blank(s)	Blank(s)	40	500	3	0	3	9	0	998	No radiation and/or cancer-directed surgery	None	Alive or dead of other cause	Alive or dead due to cancer	106	Alive	One primary only	February	Yes
4520593	2005	Male	76	White	Married (including common law)	Hepatic Flexure	8140/3: Adenocarcinoma, NOS	C18.3-Hepatic flexure of colon	Moderately differentiated; Grade II	Blank(s)	IIA	Blank(s)	Blank(s)	T3	Blank(s)	Blank(s)	N0	40	4 or more regional lymph nodes removed	Blank(s)	Blank(s)	45	450	3	0	3	29	0	20	No radiation and/or cancer-directed surgery	None	Alive or dead of other cause	Alive or dead due to cancer	106	Alive	One primary only	February	No/Unknown
4520597	2005	Male	56	White	Single (never married)	Splenic Flexure	8140/3: Adenocarcinoma, NOS	C18.5-Splenic flexure of colon	Moderately differentiated; Grade II	Blank(s)	IIB	Blank(s)	Blank(s)	T4	Blank(s)	Blank(s)	N0	30	4 or more regional lymph nodes removed	Blank(s)	Blank(s)	95	600	3	0	3	7	0	998	No radiation and/or cancer-directed surgery	None	Alive or dead of other cause	Alive or dead due to cancer	106	Alive	One primary only	February	Yes
4520630	2005	Male	74	White	Single (never married)	Sigmoid Colon	8140/3: Adenocarcinoma, NOS	C18.7-Sigmoid colon	Moderately differentiated; Grade II	Blank(s)	I	Blank(s)	Blank(s)	T1	Blank(s)	Blank(s)	N0	30	1 to 3 regional lymph nodes removed	Blank(s)	Blank(s)	25	160	3	0	3	3	0	998	No radiation and/or cancer-directed surgery	None	Alive or dead of other cause	Dead (attributable to causes other than this cancer dx)	75	Diabetes Mellitus	One primary only	March	No/Unknown
4520640	2005	Male	66	White	Married (including common law)	Rectosigmoid Junction	8140/3: Adenocarcinoma, NOS	C19.9-Rectosigmoid junction	Moderately differentiated; Grade II	Blank(s)	I	Blank(s)	Blank(s)	T2	Blank(s)	Blank(s)	N0	30	4 or more regional lymph nodes removed	Blank(s)	Blank(s)	25	200	3	0	3	4	0	998	No radiation and/or cancer-directed surgery	None	Alive or dead of other cause	Alive or dead due to cancer	105	Alive	One primary only	March	No/Unknown
4520647	2005	Male	55	Asian or Pacific Islander	Married (including common law)	Rectosigmoid Junction	8140/3: Adenocarcinoma, NOS	C19.9-Rectosigmoid junction	Poorly differentiated; Grade III	Blank(s)	IIIA	Blank(s)	Blank(s)	T1	Blank(s)	Blank(s)	N1	30	1 to 3 regional lymph nodes removed	Blank(s)	Blank(s)	999	160	3	100	3	2	1	998	Radiation after surgery	Beam radiation	Dead (attributable to this cancer dx)	Alive or dead due to cancer	38	Colon excluding Rectum	One primary only	March	Yes
4520685	2005	Male	68	White	Married (including common law)	Sigmoid Colon	8140/3: Adenocarcinoma, NOS	C18.7-Sigmoid colon	Moderately differentiated; Grade II	Blank(s)	IIIB	Blank(s)	Blank(s)	T3	Blank(s)	Blank(s)	N1	30	4 or more regional lymph nodes removed	Blank(s)	Blank(s)	81	400	3	200	3	15	3	20	No radiation and/or cancer-directed surgery	None	Alive or dead of other cause	Dead (attributable to causes other than this cancer dx)	64	Diabetes Mellitus	One primary only	March	Yes
4520720	2005	Male	80	White	Married (including common law)	Cecum	8140/3: Adenocarcinoma, NOS	C18.0-Cecum	Poorly differentiated; Grade III	Blank(s)	IIIB	Blank(s)	Blank(s)	T3	Blank(s)	Blank(s)	N1	40	4 or more regional lymph nodes removed	Blank(s)	Blank(s)	70	400	3	100	3	30	2	20	No radiation and/or cancer-directed surgery	None	Alive or dead of other cause	Alive or dead due to cancer	106	Alive	One primary only	January	No/Unknown
4520726	2005	Female	77	Black	Married (including common law)	Sigmoid Colon	8140/3: Adenocarcinoma, NOS	C18.7-Sigmoid colon	Moderately differentiated; Grade II	Blank(s)	I	Blank(s)	Blank(s)	T2	Blank(s)	Blank(s)	N0	30	4 or more regional lymph nodes removed	Blank(s)	Blank(s)	25	200	3	0	3	4	0	10	No radiation and/or cancer-directed surgery	None	Alive or dead of other cause	Alive or dead due to cancer	105	Alive	One primary only	March	No/Unknown
4520727	2005	Female	72	White	Married (including common law)	Sigmoid Colon	8140/3: Adenocarcinoma, NOS	C18.7-Sigmoid colon	Moderately differentiated; Grade II	Blank(s)	IIA	Blank(s)	Blank(s)	T3	Blank(s)	Blank(s)	N0	30	4 or more regional lymph nodes removed	Blank(s)	Blank(s)	45	400	3	0	3	11	0	998	No radiation and/or cancer-directed surgery	None	Alive or dead of other cause	Alive or dead due to cancer	105	Alive	One primary only	March	No/Unknown
4520735	2005	Male	50	White	Married (including common law)	Sigmoid Colon	8140/3: Adenocarcinoma, NOS	C18.7-Sigmoid colon	Moderately differentiated; Grade II	Blank(s)	IIIC	Blank(s)	Blank(s)	T3	Blank(s)	Blank(s)	N2	40	4 or more regional lymph nodes removed	Blank(s)	Blank(s)	42	450	3	100	3	20	10	998	No radiation and/or cancer-directed surgery	None	Dead (attributable to this cancer dx)	Alive or dead due to cancer	88	Colon excluding Rectum	One primary only	February	Yes
4520859	2005	Male	59	White	Married (including common law)	Sigmoid Colon	8140/3: Adenocarcinoma, NOS	C18.7-Sigmoid colon	Moderately differentiated; Grade II	Blank(s)	I	Blank(s)	Blank(s)	T1	Blank(s)	Blank(s)	N0	30	4 or more regional lymph nodes removed	Blank(s)	Blank(s)	16	160	3	0	3	23	0	998	No radiation and/or cancer-directed surgery	None	Alive or dead of other cause	Alive or dead due to cancer	105	Alive	One primary only	March	No/Unknown
4520920	2005	Female	72	White	Married (including common law)	Descending Colon	8140/3: Adenocarcinoma, NOS	C18.6-Descending colon	Poorly differentiated; Grade III	Blank(s)	IIA	Blank(s)	Blank(s)	T3	Blank(s)	Blank(s)	N0	40	4 or more regional lymph nodes removed	Blank(s)	Blank(s)	88	450	3	0	3	23	0	20	No radiation and/or cancer-directed surgery	None	Alive or dead of other cause	Alive or dead due to cancer	107	Alive	One primary only	January	No/Unknown
4520985	2005	Female	51	White	Married (including common law)	Rectum	8140/3: Adenocarcinoma, NOS	C20.9-Rectum, NOS	Moderately differentiated; Grade II	Blank(s)	IIA	Blank(s)	Blank(s)	T3	Blank(s)	Blank(s)	N0	27	None	Blank(s)	Blank(s)	999	400	3	0	0	0	98	998	No radiation and/or cancer-directed surgery	None	Alive or dead of other cause	Alive or dead due to cancer	107	Alive	One primary only	January	No/Unknown
4520987	2005	Male	59	White	Married (including common law)	Rectum	8140/3: Adenocarcinoma, NOS	C20.9-Rectum, NOS	Moderately differentiated; Grade II	Blank(s)	IIIB	Blank(s)	Blank(s)	T3	Blank(s)	Blank(s)	N1	30	4 or more regional lymph nodes removed	Blank(s)	Blank(s)	30	450	6	300	3	7	1	20	Radiation prior to surgery	Beam radiation	Alive or dead of other cause	Alive or dead due to cancer	107	Alive	One primary only	January	Yes
4520988	2005	Female	53	White	Divorced	Rectosigmoid Junction	8140/3: Adenocarcinoma, NOS	C19.9-Rectosigmoid junction	Moderately differentiated; Grade II	Blank(s)	IIIC	Blank(s)	Blank(s)	T4	Blank(s)	Blank(s)	N2	30	4 or more regional lymph nodes removed	Blank(s)	Blank(s)	50	500	3	100	3	32	4	10	No radiation and/or cancer-directed surgery	None	Dead (attributable to this cancer dx)	Alive or dead due to cancer	53	Colon excluding Rectum	One primary only	March	Yes
4521054	2005	Male	67	White	Widowed	Rectum	8140/3: Adenocarcinoma, NOS	C20.9-Rectum, NOS	Poorly differentiated; Grade III	Blank(s)	IIIB	Blank(s)	Blank(s)	T4	Blank(s)	Blank(s)	N1	30	4 or more regional lymph nodes removed	Blank(s)	Blank(s)	88	610	6	100	6	30	2	10	Radiation prior to surgery	Beam radiation	Alive or dead of other cause	Alive or dead due to cancer	100	Alive	One primary only	August	Yes
4521099	2005	Male	53	White	Married (including common law)	Rectum	8490/3: Signet ring cell carcinoma	C20.9-Rectum, NOS	Poorly differentiated; Grade III	Blank(s)	I	Blank(s)	Blank(s)	T1	Blank(s)	Blank(s)	N0	30	1 to 3 regional lymph nodes removed	Blank(s)	Blank(s)	999	160	3	0	3	3	0	20	No radiation and/or cancer-directed surgery	None	Alive or dead of other cause	Alive or dead due to cancer	106	Alive	One primary only	February	No/Unknown
4521102	2005	Male	77	White	Single (never married)	Rectum	8140/3: Adenocarcinoma, NOS	C20.9-Rectum, NOS	Moderately differentiated; Grade II	Blank(s)	IIIB	Blank(s)	Blank(s)	T4	Blank(s)	Blank(s)	N1	0	None	Blank(s)	Blank(s)	999	610	0	100	0	0	98	10	No radiation and/or cancer-directed surgery	Beam radiation	Dead (attributable to this cancer dx)	Alive or dead due to cancer	18	Rectum and Rectosigmoid Junction	One primary only	March	Yes
4521118	2005	Female	64	White	Widowed	Rectosigmoid Junction	8140/3: Adenocarcinoma, NOS	C19.9-Rectosigmoid junction	Moderately differentiated; Grade II	Blank(s)	IIIB	Blank(s)	Blank(s)	T3	Blank(s)	Blank(s)	N1	30	1 to 3 regional lymph nodes removed	Blank(s)	Blank(s)	30	450	5	100	3	3	2	10	Radiation prior to surgery	Beam radiation	Alive or dead of other cause	Alive or dead due to cancer	105	Alive	One primary only	March	Yes
4521123	2005	Female	70	White	Widowed	Rectosigmoid Junction	8140/3: Adenocarcinoma, NOS	C19.9-Rectosigmoid junction	Moderately differentiated; Grade II	Blank(s)	IIB	Blank(s)	Blank(s)	T4	Blank(s)	Blank(s)	N0	31	4 or more regional lymph nodes removed	Blank(s)	Blank(s)	60	700	3	0	3	7	0	10	No radiation and/or cancer-directed surgery	None	Dead (attributable to this cancer dx)	Alive or dead due to cancer	14	Colon excluding Rectum	One primary only	April	No/Unknown
4521144	2005	Female	42	Asian or Pacific Islander	Married (including common law)	Rectum	8490/3: Signet ring cell carcinoma	C20.9-Rectum, NOS	Poorly differentiated; Grade III	Blank(s)	IIIC	Blank(s)	Blank(s)	T2	Blank(s)	Blank(s)	N2	30	4 or more regional lymph nodes removed	Blank(s)	Blank(s)	30	200	5	100	6	13	9	20	Radiation prior to surgery	Beam radiation	Alive or dead of other cause	Alive or dead due to cancer	104	Alive	One primary only	April	Yes
4521163	2005	Male	60	Asian or Pacific Islander	Married (including common law)	Transverse Colon	8140/3: Adenocarcinoma, NOS	C18.4-Transverse colon	Moderately differentiated; Grade II	Blank(s)	IIA	Blank(s)	Blank(s)	T3	Blank(s)	Blank(s)	N0	30	4 or more regional lymph nodes removed	Blank(s)	Blank(s)	29	450	3	0	3	9	0	998	No radiation and/or cancer-directed surgery	None	Alive or dead of other cause	Alive or dead due to cancer	107	Alive	One primary only	January	Yes
4521226	2005	Female	41	Asian or Pacific Islander	Married (including common law)	Rectosigmoid Junction	8140/3: Adenocarcinoma, NOS	C19.9-Rectosigmoid junction	Moderately differentiated; Grade II	Blank(s)	IIIC	Blank(s)	Blank(s)	T3	Blank(s)	Blank(s)	N2	30	4 or more regional lymph nodes removed	Blank(s)	Blank(s)	51	450	3	100	3	21	4	998	No radiation and/or cancer-directed surgery	None	Alive or dead of other cause	Alive or dead due to cancer	102	Alive	One primary only	June	Yes
4521263	2005	Male	51	White	Separated	Rectosigmoid Junction	8140/3: Adenocarcinoma, NOS	C19.9-Rectosigmoid junction	Poorly differentiated; Grade III	Blank(s)	IIIA	Blank(s)	Blank(s)	T2	Blank(s)	Blank(s)	N1	30	4 or more regional lymph nodes removed	Blank(s)	Blank(s)	32	200	5	100	5	32	0	10	Radiation before and after surgery	Beam radiation	Alive or dead of other cause	Alive or dead due to cancer	102	Alive	One primary only	June	Yes
4521276	2005	Female	65	Asian or Pacific Islander	Married (including common law)	Rectosigmoid Junction	8140/3: Adenocarcinoma, NOS	C19.9-Rectosigmoid junction	Moderately differentiated; Grade II	Blank(s)	IIIB	Blank(s)	Blank(s)	T3	Blank(s)	Blank(s)	N1	30	4 or more regional lymph nodes removed	Blank(s)	Blank(s)	999	470	3	200	3	13	2	999	Radiation after surgery	Beam radiation	Dead (attributable to this cancer dx)	Alive or dead due to cancer	82	Rectum and Rectosigmoid Junction	One primary only	April	Yes
4521300	2005	Male	68	Asian or Pacific Islander	Married (including common law)	Rectosigmoid Junction	8140/3: Adenocarcinoma, NOS	C19.9-Rectosigmoid junction	Moderately differentiated; Grade II	Blank(s)	IIA	Blank(s)	Blank(s)	T3	Blank(s)	Blank(s)	N0	30	4 or more regional lymph nodes removed	Blank(s)	Blank(s)	35	450	3	0	3	14	0	20	Radiation after surgery	Beam radiation	Alive or dead of other cause	Alive or dead due to cancer	100	Alive	One primary only	August	Yes
4521438	2005	Female	28	White	Single (never married)	Hepatic Flexure	8140/3: Adenocarcinoma, NOS	C18.3-Hepatic flexure of colon	Moderately differentiated; Grade II	Blank(s)	I	Blank(s)	Blank(s)	T1	Blank(s)	Blank(s)	N0	50	4 or more regional lymph nodes removed	Blank(s)	Blank(s)	25	160	3	0	3	57	0	20	No radiation and/or cancer-directed surgery	None	Alive or dead of other cause	Alive or dead due to cancer	104	Alive	One primary only	April	No/Unknown
4521470	2005	Female	67	Asian or Pacific Islander	Married (including common law)	Splenic Flexure	8140/3: Adenocarcinoma, NOS	C18.5-Splenic flexure of colon	Moderately differentiated; Grade II	Blank(s)	IIIB	Blank(s)	Blank(s)	T3	Blank(s)	Blank(s)	N1	30	4 or more regional lymph nodes removed	Blank(s)	Blank(s)	28	400	3	300	3	10	2	999	No radiation and/or cancer-directed surgery	None	Alive or dead of other cause	Alive or dead due to cancer	106	Alive	One primary only	February	Yes
4521477	2005	Female	63	Asian or Pacific Islander	Married (including common law)	Sigmoid Colon	8140/3: Adenocarcinoma, NOS	C18.7-Sigmoid colon	Moderately differentiated; Grade II	Blank(s)	IIIB	Blank(s)	Blank(s)	T3	Blank(s)	Blank(s)	N1	30	4 or more regional lymph nodes removed	Blank(s)	Blank(s)	45	450	3	100	3	14	2	20	No radiation and/or cancer-directed surgery	None	Alive or dead of other cause	Alive or dead due to cancer	105	Alive	One primary only	March	Yes
4521517	2005	Female	34	Asian or Pacific Islander	Married (including common law)	Cecum	8480/3: Mucinous adenocarcinoma	C18.0-Cecum	Poorly differentiated; Grade III	Blank(s)	IIIC	Blank(s)	Blank(s)	T3	Blank(s)	Blank(s)	N2	40	4 or more regional lymph nodes removed	Blank(s)	Blank(s)	40	400	3	300	3	21	5	999	No radiation and/or cancer-directed surgery	None	Dead (attributable to this cancer dx)	Alive or dead due to cancer	45	Colon excluding Rectum	One primary only	February	Yes
4521587	2005	Male	62	Asian or Pacific Islander	Married (including common law)	Ascending Colon	8480/3: Mucinous adenocarcinoma	C18.2-Ascending colon	Moderately differentiated; Grade II	Blank(s)	IIA	Blank(s)	Blank(s)	T3	Blank(s)	Blank(s)	N0	40	4 or more regional lymph nodes removed	Blank(s)	Blank(s)	65	450	3	0	3	28	0	10	No radiation and/or cancer-directed surgery	None	Alive or dead of other cause	Alive or dead due to cancer	103	Alive	One primary only	May	No/Unknown
4521592	2005	Female	80	White	Divorced	Rectum	8140/3: Adenocarcinoma, NOS	C20.9-Rectum, NOS	Poorly differentiated; Grade III	Blank(s)	IIIB	Blank(s)	Blank(s)	T3	Blank(s)	Blank(s)	N1	30	1 to 3 regional lymph nodes removed	Blank(s)	Blank(s)	20	450	3	100	3	3	2	20	Radiation prior to surgery	Beam radiation	Alive or dead of other cause	Alive or dead due to cancer	104	Alive	One primary only	April	Yes
4521609	2005	Female	38	White	Married (including common law)	Rectum	8140/3: Adenocarcinoma, NOS	C20.9-Rectum, NOS	Moderately differentiated; Grade II	Blank(s)	IIA	Blank(s)	Blank(s)	T3	Blank(s)	Blank(s)	N0	50	4 or more regional lymph nodes removed	Blank(s)	Blank(s)	40	400	5	0	5	6	0	20	Radiation prior to surgery	Beam radiation	Alive or dead of other cause	Alive or dead due to cancer	104	Alive	One primary only	April	Yes
4521740	2005	Male	69	Asian or Pacific Islander	Married (including common law)	Sigmoid Colon	8140/3: Adenocarcinoma, NOS	C18.7-Sigmoid colon	Moderately differentiated; Grade II	Blank(s)	IIA	Blank(s)	Blank(s)	T3	Blank(s)	Blank(s)	N0	30	4 or more regional lymph nodes removed	Blank(s)	Blank(s)	60	400	3	0	3	24	0	998	No radiation and/or cancer-directed surgery	None	Alive or dead of other cause	Alive or dead due to cancer	107	Alive	One primary only	January	No/Unknown
4521754	2005	Female	39	Asian or Pacific Islander	Single (never married)	Rectum	8140/3: Adenocarcinoma, NOS	C20.9-Rectum, NOS	Moderately differentiated; Grade II	Blank(s)	IIA	Blank(s)	Blank(s)	T3	Blank(s)	Blank(s)	N0	30	4 or more regional lymph nodes removed	Blank(s)	Blank(s)	50	400	5	0	5	11	0	998	Radiation prior to surgery	Beam radiation	Alive or dead of other cause	Alive or dead due to cancer	106	Alive	One primary only	January	Yes
4521870	2005	Female	73	Asian or Pacific Islander	Widowed	Ascending Colon	8140/3: Adenocarcinoma, NOS	C18.2-Ascending colon	Moderately differentiated; Grade II	Blank(s)	IIIB	Blank(s)	Blank(s)	T3	Blank(s)	Blank(s)	N1	40	4 or more regional lymph nodes removed	Blank(s)	Blank(s)	25	400	3	300	3	7	2	998	No radiation and/or cancer-directed surgery	None	Alive or dead of other cause	Alive or dead due to cancer	104	Alive	One primary only	April	Yes
4521896	2005	Male	51	White	Married (including common law)	Sigmoid Colon	8140/3: Adenocarcinoma, NOS	C18.7-Sigmoid colon	Moderately differentiated; Grade II	Blank(s)	IIIB	Blank(s)	Blank(s)	T3	Blank(s)	Blank(s)	N1	30	4 or more regional lymph nodes removed	Blank(s)	Blank(s)	40	450	3	300	3	30	1	10	No radiation and/or cancer-directed surgery	None	Alive or dead of other cause	Alive or dead due to cancer	104	Alive	One primary only	April	Yes
4521921	2005	Male	61	White	Single (never married)	Rectum	8140/3: Adenocarcinoma, NOS	C20.9-Rectum, NOS	Moderately differentiated; Grade II	Blank(s)	IIIB	Blank(s)	Blank(s)	T3	Blank(s)	Blank(s)	N1	30	4 or more regional lymph nodes removed	Blank(s)	Blank(s)	40	400	5	100	5	24	0	999	Radiation prior to surgery	Beam radiation	Alive or dead of other cause	Alive or dead due to cancer	103	Alive	One primary only	May	Yes
4522021	2005	Female	62	White	Divorced	Rectum	8140/3: Adenocarcinoma, NOS	C20.9-Rectum, NOS	Moderately differentiated; Grade II	Blank(s)	IIIB	Blank(s)	Blank(s)	T3	Blank(s)	Blank(s)	N1	30	4 or more regional lymph nodes removed	Blank(s)	Blank(s)	40	450	3	300	3	7	1	20	Radiation after surgery	Beam radiation	Alive or dead of other cause	Alive or dead due to cancer	105	Alive	One primary only	March	Yes
4522028	2005	Male	68	Black	Married (including common law)	Rectum	8140/3: Adenocarcinoma, NOS	C20.9-Rectum, NOS	Moderately differentiated; Grade II	Blank(s)	IIIB	Blank(s)	Blank(s)	T3	Blank(s)	Blank(s)	N1	50	4 or more regional lymph nodes removed	Blank(s)	Blank(s)	30	450	6	100	6	10	1	20	Radiation prior to surgery	Beam radiation	Dead (attributable to this cancer dx)	Alive or dead due to cancer	34	Rectum and Rectosigmoid Junction	One primary only	February	Yes
4522044	2005	Male	72	White	Single (never married)	Rectum	8140/3: Adenocarcinoma, NOS	C20.9-Rectum, NOS	Moderately differentiated; Grade II	Blank(s)	I	Blank(s)	Blank(s)	T1	Blank(s)	Blank(s)	N0	0	None	Blank(s)	Blank(s)	50	300	1	0	0	0	98	998	No radiation and/or cancer-directed surgery	Beam radiation	Dead (attributable to this cancer dx)	Alive or dead due to cancer	26	Rectum and Rectosigmoid Junction	One primary only	May	Yes
4522045	2005	Male	51	White	Single (never married)	Rectum	8140/3: Adenocarcinoma, NOS	C20.9-Rectum, NOS	Poorly differentiated; Grade III	Blank(s)	I	Blank(s)	Blank(s)	T2	Blank(s)	Blank(s)	N0	30	4 or more regional lymph nodes removed	Blank(s)	Blank(s)	20	200	3	0	3	10	0	20	No radiation and/or cancer-directed surgery	None	Alive or dead of other cause	Alive or dead due to cancer	102	Alive	One primary only	June	No/Unknown
4522106	2004	Male	68	White	Single (never married)	Descending Colon	8140/3: Adenocarcinoma, NOS	C18.6-Descending colon	Moderately differentiated; Grade II	Blank(s)	IIA	Blank(s)	Blank(s)	T3	Blank(s)	Blank(s)	N0	30	4 or more regional lymph nodes removed	Blank(s)	Blank(s)	30	400	3	0	3	14	0	998	No radiation and/or cancer-directed surgery	None	Alive or dead of other cause	Alive or dead due to cancer	114	Alive	One primary only	June	No/Unknown
4522162	2005	Female	80	White	Widowed	Cecum	8140/3: Adenocarcinoma, NOS	C18.0-Cecum	Well differentiated; Grade I	Blank(s)	IIA	Blank(s)	Blank(s)	T3	Blank(s)	Blank(s)	N0	80	Number of regional lymph nodes removed unknown	Blank(s)	Blank(s)	72	400	3	0	3	30	0	10	No radiation and/or cancer-directed surgery	None	Alive or dead of other cause	Alive or dead due to cancer	101	Alive	One primary only	July	Yes
4522165	2005	Male	72	Asian or Pacific Islander	Married (including common law)	Rectum	8140/3: Adenocarcinoma, NOS	C20.9-Rectum, NOS	Moderately differentiated; Grade II	Blank(s)	IIIC	Blank(s)	Blank(s)	T3	Blank(s)	Blank(s)	N2	50	4 or more regional lymph nodes removed	Blank(s)	Blank(s)	100	400	3	100	3	40	20	998	Radiation after surgery	Beam radiation	Alive or dead of other cause	Alive or dead due to cancer	100	Alive	One primary only	August	Yes
4522319	2005	Male	59	White	Single (never married)	Sigmoid Colon	8140/3: Adenocarcinoma, NOS	C18.7-Sigmoid colon	Moderately differentiated; Grade II	Blank(s)	IIA	Blank(s)	Blank(s)	T3	Blank(s)	Blank(s)	N0	30	4 or more regional lymph nodes removed	Blank(s)	Blank(s)	60	400	3	0	3	36	0	998	No radiation and/or cancer-directed surgery	None	Alive or dead of other cause	Alive or dead due to cancer	101	Alive	One primary only	July	No/Unknown
4522331	2005	Female	37	Black	Married (including common law)	Splenic Flexure	8480/3: Mucinous adenocarcinoma	C18.5-Splenic flexure of colon	Moderately differentiated; Grade II	Blank(s)	IIIB	Blank(s)	Blank(s)	T3	Blank(s)	Blank(s)	N1	40	4 or more regional lymph nodes removed	Blank(s)	Blank(s)	28	450	3	300	3	18	1	998	No radiation and/or cancer-directed surgery	None	Alive or dead of other cause	Alive or dead due to cancer	102	Alive	One primary only	June	Yes
4522333	2005	Male	55	Asian or Pacific Islander	Married (including common law)	Descending Colon	8140/3: Adenocarcinoma, NOS	C18.6-Descending colon	Moderately differentiated; Grade II	Blank(s)	IIA	Blank(s)	Blank(s)	T3	Blank(s)	Blank(s)	N0	30	4 or more regional lymph nodes removed	Blank(s)	Blank(s)	75	400	3	0	3	12	0	999	No radiation and/or cancer-directed surgery	None	Alive or dead of other cause	Alive or dead due to cancer	69	Alive	One primary only	July	No/Unknown
4522338	2005	Female	72	Black	Married (including common law)	Splenic Flexure	8480/3: Mucinous adenocarcinoma	C18.5-Splenic flexure of colon	Poorly differentiated; Grade III	Blank(s)	IIIB	Blank(s)	Blank(s)	T4	Blank(s)	Blank(s)	N1	30	1 to 3 regional lymph nodes removed	Blank(s)	Blank(s)	85	570	3	100	3	98	97	10	No radiation and/or cancer-directed surgery	None	Dead (attributable to this cancer dx)	Alive or dead due to cancer	18	Colon excluding Rectum	One primary only	May	Yes
4522356	2005	Male	74	Black	Married (including common law)	Transverse Colon	8480/3: Mucinous adenocarcinoma	C18.4-Transverse colon	Poorly differentiated; Grade III	Blank(s)	IIA	Blank(s)	Blank(s)	T3	Blank(s)	Blank(s)	N0	30	4 or more regional lymph nodes removed	Blank(s)	Blank(s)	30	450	3	0	3	9	0	10	No radiation and/or cancer-directed surgery	None	Alive or dead of other cause	Alive or dead due to cancer	104	Alive	One primary only	April	No/Unknown
4522363	2005	Female	70	White	Divorced	Hepatic Flexure	8140/3: Adenocarcinoma, NOS	C18.3-Hepatic flexure of colon	Well differentiated; Grade I	Blank(s)	IIA	Blank(s)	Blank(s)	T3	Blank(s)	Blank(s)	N0	41	4 or more regional lymph nodes removed	Blank(s)	Blank(s)	80	450	3	0	3	62	0	998	No radiation and/or cancer-directed surgery	None	Alive or dead of other cause	Alive or dead due to cancer	104	Alive	One primary only	April	No/Unknown
4522366	2005	Male	55	White	Married (including common law)	Ascending Colon	8481/3: Mucin-producing adenocarcinoma	C18.2-Ascending colon	Moderately differentiated; Grade II	Blank(s)	IIA	Blank(s)	Blank(s)	T3	Blank(s)	Blank(s)	N0	40	4 or more regional lymph nodes removed	Blank(s)	Blank(s)	20	400	3	0	3	7	0	20	No radiation and/or cancer-directed surgery	None	Alive or dead of other cause	Alive or dead due to cancer	106	Alive	One primary only	February	No/Unknown
4522371	2005	Male	75	White	Married (including common law)	Ascending Colon	8480/3: Mucinous adenocarcinoma	C18.2-Ascending colon	Moderately differentiated; Grade II	Blank(s)	IIIB	Blank(s)	Blank(s)	T3	Blank(s)	Blank(s)	N1	40	4 or more regional lymph nodes removed	Blank(s)	Blank(s)	60	450	3	300	3	7	1	20	No radiation and/or cancer-directed surgery	None	Alive or dead of other cause	Alive or dead due to cancer	107	Alive	One primary only	January	Yes
4522376	2005	Female	72	White	Married (including common law)	Ascending Colon	8140/3: Adenocarcinoma, NOS	C18.2-Ascending colon	Poorly differentiated; Grade III	Blank(s)	IIIC	Blank(s)	Blank(s)	T3	Blank(s)	Blank(s)	N2	40	4 or more regional lymph nodes removed	Blank(s)	Blank(s)	38	400	3	100	3	18	6	10	No radiation and/or cancer-directed surgery	None	Dead (attributable to this cancer dx)	Alive or dead due to cancer	1	Colon excluding Rectum	One primary only	March	No/Unknown
4522403	2005	Female	47	Asian or Pacific Islander	Single (never married)	Appendix	8480/3: Mucinous adenocarcinoma	C18.1-Appendix	Poorly differentiated; Grade III	Blank(s)	IIIC	Blank(s)	Blank(s)	T4	Blank(s)	Blank(s)	N2	32	4 or more regional lymph nodes removed	Blank(s)	Blank(s)	47	600	3	300	3	21	5	20	No radiation and/or cancer-directed surgery	None	Alive or dead of other cause	Alive or dead due to cancer	107	Alive	One primary only	January	Yes
4522414	2005	Male	63	White	Married (including common law)	Rectosigmoid Junction	8140/3: Adenocarcinoma, NOS	C19.9-Rectosigmoid junction	Moderately differentiated; Grade II	Blank(s)	I	Blank(s)	Blank(s)	T2	Blank(s)	Blank(s)	N0	30	None	Blank(s)	Blank(s)	999	200	3	0	0	0	98	999	No radiation and/or cancer-directed surgery	None	Alive or dead of other cause	Alive or dead due to cancer	106	Alive	One primary only	February	No/Unknown
4522420	2005	Male	69	Asian or Pacific Islander	Married (including common law)	Cecum	8140/3: Adenocarcinoma, NOS	C18.0-Cecum	Moderately differentiated; Grade II	Blank(s)	I	Blank(s)	Blank(s)	T2	Blank(s)	Blank(s)	N0	30	4 or more regional lymph nodes removed	Blank(s)	Blank(s)	60	200	3	0	3	8	0	999	No radiation and/or cancer-directed surgery	None	Alive or dead of other cause	Alive or dead due to cancer	105	Alive	One primary only	March	No/Unknown
4522425	2005	Male	53	White	Single (never married)	Ascending Colon	8140/3: Adenocarcinoma, NOS	C18.2-Ascending colon	Moderately differentiated; Grade II	Blank(s)	IIA	Blank(s)	Blank(s)	T3	Blank(s)	Blank(s)	N0	30	4 or more regional lymph nodes removed	Blank(s)	Blank(s)	31	400	3	0	3	11	0	20	No radiation and/or cancer-directed surgery	None	Dead (attributable to this cancer dx)	Alive or dead due to cancer	33	Colon excluding Rectum	One primary only	April	No/Unknown
4522460	2005	Female	75	Black	Divorced	Rectosigmoid Junction	8140/3: Adenocarcinoma, NOS	C19.9-Rectosigmoid junction	Moderately differentiated; Grade II	Blank(s)	IIIB	Blank(s)	Blank(s)	T3	Blank(s)	Blank(s)	N1	30	4 or more regional lymph nodes removed	Blank(s)	Blank(s)	70	450	3	100	3	39	3	30	No radiation and/or cancer-directed surgery	None	Dead (attributable to this cancer dx)	Alive or dead due to cancer	40	Rectum and Rectosigmoid Junction	One primary only	June	Yes
4522518	2005	Female	66	White	Married (including common law)	Ascending Colon	8140/3: Adenocarcinoma, NOS	C18.2-Ascending colon	Moderately differentiated; Grade II	Blank(s)	IIA	Blank(s)	Blank(s)	T3	Blank(s)	Blank(s)	N0	40	4 or more regional lymph nodes removed	Blank(s)	Blank(s)	60	450	3	0	3	12	0	10	No radiation and/or cancer-directed surgery	None	Alive or dead of other cause	Alive or dead due to cancer	103	Alive	One primary only	May	Yes
4522523	2005	Male	72	White	Married (including common law)	Ascending Colon	8140/3: Adenocarcinoma, NOS	C18.2-Ascending colon	Moderately differentiated; Grade II	Blank(s)	IIIB	Blank(s)	Blank(s)	T3	Blank(s)	Blank(s)	N1	40	4 or more regional lymph nodes removed	Blank(s)	Blank(s)	55	400	3	300	3	7	1	10	No radiation and/or cancer-directed surgery	None	Dead (attributable to this cancer dx)	Alive or dead due to cancer	16	Colon excluding Rectum	One primary only	June	Yes
4522532	2005	Female	64	Asian or Pacific Islander	Married (including common law)	Ascending Colon	8140/3: Adenocarcinoma, NOS	C18.2-Ascending colon	Poorly differentiated; Grade III	Blank(s)	IIA	Blank(s)	Blank(s)	T3	Blank(s)	Blank(s)	N0	40	4 or more regional lymph nodes removed	Blank(s)	Blank(s)	90	450	3	0	3	16	0	20	No radiation and/or cancer-directed surgery	None	Alive or dead of other cause	Alive or dead due to cancer	102	Alive	One primary only	June	Yes
4522543	2005	Female	55	Asian or Pacific Islander	Single (never married)	Splenic Flexure	8140/3: Adenocarcinoma, NOS	C18.5-Splenic flexure of colon	Moderately differentiated; Grade II	Blank(s)	IIIC	Blank(s)	Blank(s)	T3	Blank(s)	Blank(s)	N2	30	4 or more regional lymph nodes removed	Blank(s)	Blank(s)	30	450	3	300	3	25	15	998	No radiation and/or cancer-directed surgery	None	Alive or dead of other cause	Alive or dead due to cancer	103	Alive	One primary only	May	Yes
4522568	2005	Female	77	White	Single (never married)	Sigmoid Colon	8140/3: Adenocarcinoma, NOS	C18.7-Sigmoid colon	Moderately differentiated; Grade II	Blank(s)	IIA	Blank(s)	Blank(s)	T3	Blank(s)	Blank(s)	N0	30	4 or more regional lymph nodes removed	Blank(s)	Blank(s)	20	400	3	0	3	20	0	20	No radiation and/or cancer-directed surgery	None	Alive or dead of other cause	Dead (attributable to causes other than this cancer dx)	23	Diseases of Heart	One primary only	June	No/Unknown
4522571	2005	Male	72	White	Married (including common law)	Rectosigmoid Junction	8140/3: Adenocarcinoma, NOS	C19.9-Rectosigmoid junction	Moderately differentiated; Grade II	Blank(s)	IIA	Blank(s)	Blank(s)	T3	Blank(s)	Blank(s)	N0	30	4 or more regional lymph nodes removed	Blank(s)	Blank(s)	50	400	3	0	3	17	0	20	No radiation and/or cancer-directed surgery	None	Alive or dead of other cause	Alive or dead due to cancer	104	Alive	One primary only	April	No/Unknown
4522595	2005	Female	42	White	Single (never married)	Rectum	8140/3: Adenocarcinoma, NOS	C20.9-Rectum, NOS	Moderately differentiated; Grade II	Blank(s)	I	Blank(s)	Blank(s)	T1	Blank(s)	Blank(s)	N0	30	4 or more regional lymph nodes removed	Blank(s)	Blank(s)	17	160	3	0	3	22	0	20	No radiation and/or cancer-directed surgery	None	Alive or dead of other cause	Alive or dead due to cancer	103	Alive	One primary only	May	No/Unknown
4522653	2005	Female	80	White	Married (including common law)	Rectosigmoid Junction	8140/3: Adenocarcinoma, NOS	C19.9-Rectosigmoid junction	Moderately differentiated; Grade II	Blank(s)	I	Blank(s)	Blank(s)	T2	Blank(s)	Blank(s)	N0	30	4 or more regional lymph nodes removed	Blank(s)	Blank(s)	35	200	3	0	2	10	0	10	No radiation and/or cancer-directed surgery	None	Alive or dead of other cause	Alive or dead due to cancer	105	Alive	One primary only	March	No/Unknown
4522667	2005	Male	71	Asian or Pacific Islander	Married (including common law)	Rectosigmoid Junction	8140/3: Adenocarcinoma, NOS	C19.9-Rectosigmoid junction	Poorly differentiated; Grade III	Blank(s)	IIIB	Blank(s)	Blank(s)	T3	Blank(s)	Blank(s)	N1	30	4 or more regional lymph nodes removed	Blank(s)	Blank(s)	50	450	3	300	3	15	1	10	No radiation and/or cancer-directed surgery	None	Dead (attributable to this cancer dx)	Alive or dead due to cancer	43	Colon excluding Rectum	One primary only	June	No/Unknown
4522712	2005	Female	54	White	Single (never married)	Rectum	8140/3: Adenocarcinoma, NOS	C20.9-Rectum, NOS	Moderately differentiated; Grade II	Blank(s)	IIIB	Blank(s)	Blank(s)	T3	Blank(s)	Blank(s)	N1	30	4 or more regional lymph nodes removed	Blank(s)	Blank(s)	999	400	1	100	0	21	0	999	Radiation prior to surgery	Beam radiation	Alive or dead of other cause	Alive or dead due to cancer	102	Alive	One primary only	June	Yes
4522895	2005	Male	52	White	Married (including common law)	Sigmoid Colon	8140/3: Adenocarcinoma, NOS	C18.7-Sigmoid colon	Poorly differentiated; Grade III	Blank(s)	IIA	Blank(s)	Blank(s)	T3	Blank(s)	Blank(s)	N0	30	4 or more regional lymph nodes removed	Blank(s)	Blank(s)	40	400	3	0	3	36	0	10	No radiation and/or cancer-directed surgery	None	Alive or dead of other cause	Alive or dead due to cancer	105	Alive	One primary only	March	Yes
4523074	2005	Male	57	Black	Divorced	Rectosigmoid Junction	8140/3: Adenocarcinoma, NOS	C19.9-Rectosigmoid junction	Moderately differentiated; Grade II	Blank(s)	IIA	Blank(s)	Blank(s)	T3	Blank(s)	Blank(s)	N0	27	4 or more regional lymph nodes removed	Blank(s)	Blank(s)	53	400	3	0	3	24	0	20	Radiation after surgery	Beam radiation	Alive or dead of other cause	Alive or dead due to cancer	104	Alive	One primary only	April	Yes
4523168	2005	Male	72	White	Married (including common law)	Sigmoid Colon	8140/3: Adenocarcinoma, NOS	C18.7-Sigmoid colon	Poorly differentiated; Grade III	Blank(s)	IIA	Blank(s)	Blank(s)	T3	Blank(s)	Blank(s)	N0	30	4 or more regional lymph nodes removed	Blank(s)	Blank(s)	50	450	3	0	3	18	0	20	No radiation and/or cancer-directed surgery	None	Dead (attributable to this cancer dx)	Alive or dead due to cancer	63	Colon excluding Rectum	One primary only	May	No/Unknown
4523184	2005	Female	58	Asian or Pacific Islander	Widowed	Hepatic Flexure	8480/3: Mucinous adenocarcinoma	C18.3-Hepatic flexure of colon	Moderately differentiated; Grade II	Blank(s)	IIA	Blank(s)	Blank(s)	T3	Blank(s)	Blank(s)	N0	40	4 or more regional lymph nodes removed	Blank(s)	Blank(s)	45	450	3	0	3	28	0	998	No radiation and/or cancer-directed surgery	None	Alive or dead of other cause	Alive or dead due to cancer	103	Alive	One primary only	May	No/Unknown
4523187	2005	Male	43	White	Single (never married)	Sigmoid Colon	8140/3: Adenocarcinoma, NOS	C18.7-Sigmoid colon	Moderately differentiated; Grade II	Blank(s)	IIIB	Blank(s)	Blank(s)	T4	Blank(s)	Blank(s)	N1	32	4 or more regional lymph nodes removed	Blank(s)	Blank(s)	40	750	3	300	3	9	1	998	No radiation and/or cancer-directed surgery	None	Alive or dead of other cause	Alive or dead due to cancer	102	Alive	One primary only	June	Yes
4523233	2005	Male	61	Asian or Pacific Islander	Married (including common law)	Ascending Colon	8480/3: Mucinous adenocarcinoma	C18.2-Ascending colon	Poorly differentiated; Grade III	Blank(s)	IIB	Blank(s)	Blank(s)	T4	Blank(s)	Blank(s)	N0	32	4 or more regional lymph nodes removed	Blank(s)	Blank(s)	90	800	3	0	3	6	0	10	No radiation and/or cancer-directed surgery	None	Alive or dead of other cause	Dead (attributable to causes other than this cancer dx)	81	Diabetes Mellitus	One primary only	April	Yes
4523371	2005	Female	52	White	Married (including common law)	Sigmoid Colon	8140/3: Adenocarcinoma, NOS	C18.7-Sigmoid colon	Moderately differentiated; Grade II	Blank(s)	IIA	Blank(s)	Blank(s)	T3	Blank(s)	Blank(s)	N0	30	4 or more regional lymph nodes removed	Blank(s)	Blank(s)	60	450	3	0	3	33	0	998	No radiation and/or cancer-directed surgery	None	Alive or dead of other cause	Alive or dead due to cancer	1	Alive	One primary only	September	No/Unknown
4523478	2005	Female	71	White	Married (including common law)	Rectum	8140/3: Adenocarcinoma, NOS	C20.9-Rectum, NOS	Moderately differentiated; Grade II	Blank(s)	IIIB	Blank(s)	Blank(s)	T3	Blank(s)	Blank(s)	N1	50	1 to 3 regional lymph nodes removed	Blank(s)	Blank(s)	40	400	5	100	6	2	1	20	Radiation prior to surgery	Beam radiation	Alive or dead of other cause	Alive or dead due to cancer	103	Alive	One primary only	May	Yes
4523479	2005	Male	65	White	Single (never married)	Sigmoid Colon	8140/3: Adenocarcinoma, NOS	C18.7-Sigmoid colon	Moderately differentiated; Grade II	Blank(s)	IIA	Blank(s)	Blank(s)	T3	Blank(s)	Blank(s)	N0	30	4 or more regional lymph nodes removed	Blank(s)	Blank(s)	12	450	3	0	3	8	0	20	No radiation and/or cancer-directed surgery	None	Alive or dead of other cause	Alive or dead due to cancer	102	Alive	One primary only	June	No/Unknown
4523494	2005	Male	53	White	Married (including common law)	Rectum	8140/3: Adenocarcinoma, NOS	C20.9-Rectum, NOS	Moderately differentiated; Grade II	Blank(s)	I	Blank(s)	Blank(s)	T2	Blank(s)	Blank(s)	N0	30	4 or more regional lymph nodes removed	Blank(s)	Blank(s)	30	200	5	0	6	10	0	20	Radiation prior to surgery	Beam radiation	Alive or dead of other cause	Alive or dead due to cancer	107	Alive	One primary only	January	Yes
4523558	2005	Male	53	White	Single (never married)	Ascending Colon	8140/3: Adenocarcinoma, NOS	C18.2-Ascending colon	Moderately differentiated; Grade II	Blank(s)	I	Blank(s)	Blank(s)	T2	Blank(s)	Blank(s)	N0	80	4 or more regional lymph nodes removed	Blank(s)	Blank(s)	35	200	3	0	3	6	0	10	No radiation and/or cancer-directed surgery	None	Alive or dead of other cause	Dead (attributable to causes other than this cancer dx)	15	Diseases of Heart	One primary only	January	No/Unknown
4523585	2005	Male	60	White	Married (including common law)	Sigmoid Colon	8140/3: Adenocarcinoma, NOS	C18.7-Sigmoid colon	Moderately differentiated; Grade II	Blank(s)	I	Blank(s)	Blank(s)	T1	Blank(s)	Blank(s)	N0	60	4 or more regional lymph nodes removed	Blank(s)	Blank(s)	25	160	3	0	3	27	0	999	No radiation and/or cancer-directed surgery	None	Alive or dead of other cause	Alive or dead due to cancer	106	Alive	One primary only	February	No/Unknown
4523657	2005	Female	65	Asian or Pacific Islander	Married (including common law)	Cecum	8140/3: Adenocarcinoma, NOS	C18.0-Cecum	Moderately differentiated; Grade II	Blank(s)	IIIB	Blank(s)	Blank(s)	T4	Blank(s)	Blank(s)	N1	40	4 or more regional lymph nodes removed	Blank(s)	Blank(s)	50	650	3	100	3	8	2	10	Radiation after surgery	Beam radiation	Alive or dead of other cause	Alive or dead due to cancer	105	Alive	One primary only	March	Yes
4523660	2005	Male	64	White	Married (including common law)	Cecum	8140/3: Adenocarcinoma, NOS	C18.0-Cecum	Moderately differentiated; Grade II	Blank(s)	IIA	Blank(s)	Blank(s)	T3	Blank(s)	Blank(s)	N0	30	4 or more regional lymph nodes removed	Blank(s)	Blank(s)	60	450	3	0	3	20	0	20	No radiation and/or cancer-directed surgery	None	Alive or dead of other cause	Alive or dead due to cancer	103	Alive	One primary only	May	Yes
4523672	2005	Male	76	Black	Widowed	Cecum	8140/3: Adenocarcinoma, NOS	C18.0-Cecum	Moderately differentiated; Grade II	Blank(s)	IIIB	Blank(s)	Blank(s)	T3	Blank(s)	Blank(s)	N1	80	4 or more regional lymph nodes removed	Blank(s)	Blank(s)	70	400	3	200	3	22	1	998	No radiation and/or cancer-directed surgery	None	Alive or dead of other cause	Alive or dead due to cancer	101	Alive	One primary only	July	Yes
4523680	2005	Male	51	White	Single (never married)	Rectum	8140/3: Adenocarcinoma, NOS	C20.9-Rectum, NOS	Moderately differentiated; Grade II	Blank(s)	IIB	Blank(s)	Blank(s)	T4	Blank(s)	Blank(s)	N0	30	4 or more regional lymph nodes removed	Blank(s)	Blank(s)	32	500	5	0	5	20	0	999	Radiation prior to surgery	Beam radiation	Alive or dead of other cause	Alive or dead due to cancer	91	Alive	One primary only	March	Yes
4523701	2005	Male	66	Asian or Pacific Islander	Married (including common law)	Rectum	8480/3: Mucinous adenocarcinoma	C20.9-Rectum, NOS	Moderately differentiated; Grade II	Blank(s)	IIA	Blank(s)	Blank(s)	T3	Blank(s)	Blank(s)	N0	30	4 or more regional lymph nodes removed	Blank(s)	Blank(s)	45	450	3	0	3	10	0	999	Radiation after surgery	Beam radiation	Alive or dead of other cause	Alive or dead due to cancer	107	Alive	One primary only	January	Yes
4523702	2005	Male	79	Asian or Pacific Islander	Married (including common law)	Rectum	8480/3: Mucinous adenocarcinoma	C20.9-Rectum, NOS	Moderately differentiated; Grade II	Blank(s)	IIA	Blank(s)	Blank(s)	T3	Blank(s)	Blank(s)	N0	30	4 or more regional lymph nodes removed	Blank(s)	Blank(s)	28	450	6	0	6	20	0	20	Radiation prior to surgery	Beam radiation	Alive or dead of other cause	Alive or dead due to cancer	102	Alive	One primary only	June	Yes
4523708	2005	Female	76	White	Married (including common law)	Ascending Colon	8140/3: Adenocarcinoma, NOS	C18.2-Ascending colon	Moderately differentiated; Grade II	Blank(s)	IIIA	Blank(s)	Blank(s)	T2	Blank(s)	Blank(s)	N1	40	4 or more regional lymph nodes removed	Blank(s)	Blank(s)	35	200	3	300	3	27	1	998	No radiation and/or cancer-directed surgery	None	Alive or dead of other cause	Alive or dead due to cancer	102	Alive	One primary only	June	No/Unknown
4523719	2005	Male	72	White	Married (including common law)	Transverse Colon	8140/3: Adenocarcinoma, NOS	C18.4-Transverse colon	Moderately differentiated; Grade II	Blank(s)	IIB	Blank(s)	Blank(s)	T4	Blank(s)	Blank(s)	N0	30	4 or more regional lymph nodes removed	Blank(s)	Blank(s)	50	600	3	0	3	8	0	10	No radiation and/or cancer-directed surgery	None	Dead (attributable to this cancer dx)	Alive or dead due to cancer	20	Colon excluding Rectum	One primary only	March	Yes
4523724	2005	Female	80	White	Widowed	Sigmoid Colon	8140/3: Adenocarcinoma, NOS	C18.7-Sigmoid colon	Moderately differentiated; Grade II	Blank(s)	IIA	Blank(s)	Blank(s)	T3	Blank(s)	Blank(s)	N0	30	4 or more regional lymph nodes removed	Blank(s)	Blank(s)	35	450	3	0	3	5	0	998	No radiation and/or cancer-directed surgery	None	Dead (attributable to this cancer dx)	Alive or dead due to cancer	20	Colon excluding Rectum	One primary only	April	No/Unknown
4523726	2005	Female	80	Asian or Pacific Islander	Widowed	Sigmoid Colon	8140/3: Adenocarcinoma, NOS	C18.7-Sigmoid colon	Moderately differentiated; Grade II	Blank(s)	I	Blank(s)	Blank(s)	T2	Blank(s)	Blank(s)	N0	30	4 or more regional lymph nodes removed	Blank(s)	Blank(s)	25	200	3	0	3	11	0	998	No radiation and/or cancer-directed surgery	None	Alive or dead of other cause	Alive or dead due to cancer	104	Alive	One primary only	April	No/Unknown
4523749	2005	Male	72	White	Married (including common law)	Sigmoid Colon	8140/3: Adenocarcinoma, NOS	C18.7-Sigmoid colon	Moderately differentiated; Grade II	Blank(s)	IIIB	Blank(s)	Blank(s)	T3	Blank(s)	Blank(s)	N1	30	4 or more regional lymph nodes removed	Blank(s)	Blank(s)	999	400	3	300	3	5	1	10	No radiation and/or cancer-directed surgery	None	Dead (attributable to this cancer dx)	Alive or dead due to cancer	64	Colon excluding Rectum	One primary only	June	Yes
4523774	2005	Male	75	Asian or Pacific Islander	Married (including common law)	Ascending Colon	8140/3: Adenocarcinoma, NOS	C18.2-Ascending colon	Well differentiated; Grade I	Blank(s)	IIIB	Blank(s)	Blank(s)	T3	Blank(s)	Blank(s)	N1	40	4 or more regional lymph nodes removed	Blank(s)	Blank(s)	45	400	3	300	3	19	1	20	No radiation and/or cancer-directed surgery	None	Alive or dead of other cause	Alive or dead due to cancer	76	Alive	One primary only	June	Yes
4523794	2005	Female	74	White	Widowed	Cecum	8140/3: Adenocarcinoma, NOS	C18.0-Cecum	Moderately differentiated; Grade II	Blank(s)	I	Blank(s)	Blank(s)	T2	Blank(s)	Blank(s)	N0	40	4 or more regional lymph nodes removed	Blank(s)	Blank(s)	38	200	3	0	3	7	0	20	No radiation and/or cancer-directed surgery	None	Alive or dead of other cause	Dead (attributable to causes other than this cancer dx)	57	Chronic Obstructive Pulmonary Disease and Allied Cond	One primary only	March	No/Unknown
4523801	2005	Female	50	Asian or Pacific Islander	Married (including common law)	Sigmoid Colon	8140/3: Adenocarcinoma, NOS	C18.7-Sigmoid colon	Moderately differentiated; Grade II	Blank(s)	IIIB	Blank(s)	Blank(s)	T3	Blank(s)	Blank(s)	N1	30	4 or more regional lymph nodes removed	Blank(s)	Blank(s)	35	450	3	100	3	8	1	20	No radiation and/or cancer-directed surgery	None	Dead (attributable to this cancer dx)	Alive or dead due to cancer	83	Colon excluding Rectum	One primary only	January	Yes
4523813	2005	Female	73	White	Widowed	Sigmoid Colon	8140/3: Adenocarcinoma, NOS	C18.7-Sigmoid colon	Moderately differentiated; Grade II	Blank(s)	IIIC	Blank(s)	Blank(s)	T2	Blank(s)	Blank(s)	N2	30	4 or more regional lymph nodes removed	Blank(s)	Blank(s)	999	200	3	200	3	26	9	20	No radiation and/or cancer-directed surgery	None	Alive or dead of other cause	Alive or dead due to cancer	106	Alive	One primary only	February	Yes
4523816	2005	Male	45	White	Unknown	Rectum	8140/3: Adenocarcinoma, NOS	C20.9-Rectum, NOS	Moderately differentiated; Grade II	Blank(s)	IIIB	Blank(s)	Blank(s)	T3	Blank(s)	Blank(s)	N1	0	None	Blank(s)	Blank(s)	999	400	1	100	0	0	98	20	No radiation and/or cancer-directed surgery	Beam radiation	Alive or dead of other cause	Alive or dead due to cancer	103	Alive	One primary only	May	Yes
4523877	2005	Female	44	White	Married (including common law)	Hepatic Flexure	8140/3: Adenocarcinoma, NOS	C18.3-Hepatic flexure of colon	Moderately differentiated; Grade II	Blank(s)	IIA	Blank(s)	Blank(s)	T3	Blank(s)	Blank(s)	N0	40	4 or more regional lymph nodes removed	Blank(s)	Blank(s)	110	400	3	0	3	27	0	999	No radiation and/or cancer-directed surgery	None	Alive or dead of other cause	Alive or dead due to cancer	106	Alive	One primary only	February	Yes
4523880	2005	Male	67	White	Married (including common law)	Transverse Colon	8490/3: Signet ring cell carcinoma	C18.4-Transverse colon	Poorly differentiated; Grade III	Blank(s)	IIIB	Blank(s)	Blank(s)	T3	Blank(s)	Blank(s)	N1	40	4 or more regional lymph nodes removed	Blank(s)	Blank(s)	55	450	3	100	3	13	1	20	No radiation and/or cancer-directed surgery	None	Dead (attributable to this cancer dx)	Alive or dead due to cancer	27	Colon excluding Rectum	One primary only	April	Yes
4523882	2005	Male	48	White	Married (including common law)	Rectum	8140/3: Adenocarcinoma, NOS	C20.9-Rectum, NOS	Moderately differentiated; Grade II	Blank(s)	IIIC	Blank(s)	Blank(s)	T3	Blank(s)	Blank(s)	N2	30	4 or more regional lymph nodes removed	Blank(s)	Blank(s)	120	400	5	100	6	10	5	20	Radiation prior to surgery	Beam radiation	Alive or dead of other cause	Alive or dead due to cancer	105	Alive	One primary only	March	Yes
4523883	2004	Female	67	White	Divorced	Cecum	8140/3: Adenocarcinoma, NOS	C18.0-Cecum	Moderately differentiated; Grade II	Blank(s)	I	Blank(s)	Blank(s)	T2	Blank(s)	Blank(s)	N0	40	4 or more regional lymph nodes removed	Blank(s)	Blank(s)	50	200	3	0	3	17	0	999	No radiation and/or cancer-directed surgery	None	Alive or dead of other cause	Dead (attributable to causes other than this cancer dx)	20	Other Cause of Death	One primary only	December	No/Unknown
4523902	2005	Male	63	White	Single (never married)	Sigmoid Colon	8140/3: Adenocarcinoma, NOS	C18.7-Sigmoid colon	Moderately differentiated; Grade II	Blank(s)	IIA	Blank(s)	Blank(s)	T3	Blank(s)	Blank(s)	N0	30	4 or more regional lymph nodes removed	Blank(s)	Blank(s)	35	450	3	0	3	39	0	20	No radiation and/or cancer-directed surgery	None	Alive or dead of other cause	Dead (attributable to causes other than this cancer dx)	22	Diseases of Heart	One primary only	June	No/Unknown
4523910	2005	Male	64	White	Single (never married)	Rectosigmoid Junction	8140/3: Adenocarcinoma, NOS	C19.9-Rectosigmoid junction	Moderately differentiated; Grade II	Blank(s)	IIIB	Blank(s)	Blank(s)	T3	Blank(s)	Blank(s)	N1	30	4 or more regional lymph nodes removed	Blank(s)	Blank(s)	70	400	0	100	5	14	1	999	Radiation prior to surgery	Beam radiation	Dead (attributable to this cancer dx)	Alive or dead due to cancer	64	Rectum and Rectosigmoid Junction	One primary only	June	Yes
4523941	2005	Female	60	White	Single (never married)	Sigmoid Colon	8140/3: Adenocarcinoma, NOS	C18.7-Sigmoid colon	Moderately differentiated; Grade II	Blank(s)	IIA	Blank(s)	Blank(s)	T3	Blank(s)	Blank(s)	N0	30	4 or more regional lymph nodes removed	Blank(s)	Blank(s)	80	400	3	0	3	27	0	999	No radiation and/or cancer-directed surgery	None	Alive or dead of other cause	Alive or dead due to cancer	104	Alive	One primary only	April	No/Unknown
4523946	2005	Female	53	White	Married (including common law)	Descending Colon	8140/3: Adenocarcinoma, NOS	C18.6-Descending colon	Moderately differentiated; Grade II	Blank(s)	IIIC	Blank(s)	Blank(s)	T3	Blank(s)	Blank(s)	N2	40	4 or more regional lymph nodes removed	Blank(s)	Blank(s)	35	450	3	100	3	17	7	20	No radiation and/or cancer-directed surgery	None	Alive or dead of other cause	Alive or dead due to cancer	101	Alive	One primary only	July	Yes
4523949	2005	Female	63	White	Married (including common law)	Splenic Flexure	8480/3: Mucinous adenocarcinoma	C18.5-Splenic flexure of colon	Moderately differentiated; Grade II	Blank(s)	IIIB	Blank(s)	Blank(s)	T3	Blank(s)	Blank(s)	N1	30	4 or more regional lymph nodes removed	Blank(s)	Blank(s)	85	450	3	100	3	33	2	999	No radiation and/or cancer-directed surgery	None	Dead (attributable to this cancer dx)	Alive or dead due to cancer	53	Colon excluding Rectum	One primary only	June	No/Unknown
4524062	2005	Female	61	White	Married (including common law)	Rectum	8140/3: Adenocarcinoma, NOS	C20.9-Rectum, NOS	Moderately differentiated; Grade II	Blank(s)	IIIB	Blank(s)	Blank(s)	T3	Blank(s)	Blank(s)	N1	0	None	Blank(s)	Blank(s)	80	400	1	100	0	0	98	20	No radiation and/or cancer-directed surgery	Beam radiation	Alive or dead of other cause	Alive or dead due to cancer	102	Alive	One primary only	June	Yes
4525211	2005	Male	58	Black	Married (including common law)	Sigmoid Colon	8140/3: Adenocarcinoma, NOS	C18.7-Sigmoid colon	Moderately differentiated; Grade II	Blank(s)	I	Blank(s)	Blank(s)	T2	Blank(s)	Blank(s)	N0	30	4 or more regional lymph nodes removed	Blank(s)	Blank(s)	25	200	3	0	3	9	0	998	No radiation and/or cancer-directed surgery	None	Alive or dead of other cause	Alive or dead due to cancer	107	Alive	One primary only	January	No/Unknown
4525216	2005	Female	77	White	Widowed	Sigmoid Colon	8140/3: Adenocarcinoma, NOS	C18.7-Sigmoid colon	Moderately differentiated; Grade II	Blank(s)	IIA	Blank(s)	Blank(s)	T3	Blank(s)	Blank(s)	N0	40	4 or more regional lymph nodes removed	Blank(s)	Blank(s)	25	450	3	0	3	16	0	20	No radiation and/or cancer-directed surgery	None	Alive or dead of other cause	Alive or dead due to cancer	105	Alive	One primary only	March	No/Unknown
4525219	2005	Female	72	White	Married (including common law)	Sigmoid Colon	8140/3: Adenocarcinoma, NOS	C18.7-Sigmoid colon	Poorly differentiated; Grade III	Blank(s)	IIIC	Blank(s)	Blank(s)	T3	Blank(s)	Blank(s)	N2	30	4 or more regional lymph nodes removed	Blank(s)	Blank(s)	999	450	3	200	3	15	14	20	No radiation and/or cancer-directed surgery	None	Dead (attributable to this cancer dx)	Alive or dead due to cancer	43	Colon excluding Rectum	One primary only	March	Yes
4525224	2005	Female	54	White	Divorced	Large Intestine, NOS	8140/3: Adenocarcinoma, NOS	C18.8-Overlapping lesion of colon	Poorly differentiated; Grade III	Blank(s)	IIIB	Blank(s)	Blank(s)	T4	Blank(s)	Blank(s)	N1	30	4 or more regional lymph nodes removed	Blank(s)	Blank(s)	999	600	3	100	3	8	3	20	No radiation and/or cancer-directed surgery	None	Alive or dead of other cause	Alive or dead due to cancer	106	Alive	One primary only	February	Yes
4525227	2005	Female	76	White	Divorced	Cecum	8140/3: Adenocarcinoma, NOS	C18.0-Cecum	Poorly differentiated; Grade III	Blank(s)	IIIB	Blank(s)	Blank(s)	T3	Blank(s)	Blank(s)	N1	40	4 or more regional lymph nodes removed	Blank(s)	Blank(s)	50	450	3	100	3	12	3	20	No radiation and/or cancer-directed surgery	None	Alive or dead of other cause	Alive or dead due to cancer	106	Alive	One primary only	February	Yes
4525229	2005	Female	56	Asian or Pacific Islander	Married (including common law)	Transverse Colon	8140/3: Adenocarcinoma, NOS	C18.4-Transverse colon	Poorly differentiated; Grade III	Blank(s)	IIA	Blank(s)	Blank(s)	T3	Blank(s)	Blank(s)	N0	41	4 or more regional lymph nodes removed	Blank(s)	Blank(s)	120	460	3	0	3	25	0	20	No radiation and/or cancer-directed surgery	None	Alive or dead of other cause	Alive or dead due to cancer	107	Alive	One primary only	January	No/Unknown
4525231	2005	Female	66	White	Divorced	Ascending Colon	8140/3: Adenocarcinoma, NOS	C18.2-Ascending colon	Moderately differentiated; Grade II	Blank(s)	IIIB	Blank(s)	Blank(s)	T4	Blank(s)	Blank(s)	N1	40	4 or more regional lymph nodes removed	Blank(s)	Blank(s)	50	500	3	800	3	13	8	20	No radiation and/or cancer-directed surgery	None	Dead (attributable to this cancer dx)	Alive or dead due to cancer	13	Colon excluding Rectum	One primary only	July	Yes
4525234	2005	Female	48	White	Married (including common law)	Cecum	8140/3: Adenocarcinoma, NOS	C18.0-Cecum	Moderately differentiated; Grade II	Blank(s)	IIIB	Blank(s)	Blank(s)	T3	Blank(s)	Blank(s)	N1	40	4 or more regional lymph nodes removed	Blank(s)	Blank(s)	25	400	3	300	3	10	3	20	Radiation after surgery	Beam radiation	Dead (attributable to this cancer dx)	Alive or dead due to cancer	38	Colon excluding Rectum	One primary only	July	Yes
4525236	2005	Male	45	White	Married (including common law)	Cecum	8140/3: Adenocarcinoma, NOS	C18.0-Cecum	Moderately differentiated; Grade II	Blank(s)	IIIB	Blank(s)	Blank(s)	T3	Blank(s)	Blank(s)	N1	40	4 or more regional lymph nodes removed	Blank(s)	Blank(s)	30	450	3	100	3	20	3	10	No radiation and/or cancer-directed surgery	None	Dead (attributable to this cancer dx)	Alive or dead due to cancer	39	Colon excluding Rectum	One primary only	July	Yes
4525380	2005	Female	54	White	Widowed	Descending Colon	8140/3: Adenocarcinoma, NOS	C18.6-Descending colon	Poorly differentiated; Grade III	Blank(s)	IIIB	Blank(s)	Blank(s)	T3	Blank(s)	Blank(s)	N1	30	4 or more regional lymph nodes removed	Blank(s)	Blank(s)	25	450	3	100	3	14	1	20	No radiation and/or cancer-directed surgery	None	Alive or dead of other cause	Alive or dead due to cancer	100	Alive	One primary only	August	Yes
4525383	2005	Male	57	Asian or Pacific Islander	Married (including common law)	Sigmoid Colon	8140/3: Adenocarcinoma, NOS	C18.7-Sigmoid colon	Moderately differentiated; Grade II	Blank(s)	I	Blank(s)	Blank(s)	T2	Blank(s)	Blank(s)	N0	30	4 or more regional lymph nodes removed	Blank(s)	Blank(s)	30	200	3	0	3	5	0	20	No radiation and/or cancer-directed surgery	None	Alive or dead of other cause	Alive or dead due to cancer	106	Alive	One primary only	February	No/Unknown
4525386	2005	Male	28	White	Single (never married)	Sigmoid Colon	8140/3: Adenocarcinoma, NOS	C18.7-Sigmoid colon	Moderately differentiated; Grade II	Blank(s)	IIIB	Blank(s)	Blank(s)	T3	Blank(s)	Blank(s)	N1	30	4 or more regional lymph nodes removed	Blank(s)	Blank(s)	35	400	3	100	3	5	2	999	No radiation and/or cancer-directed surgery	None	Alive or dead of other cause	Alive or dead due to cancer	107	Alive	One primary only	January	Yes
4525391	2005	Male	76	White	Married (including common law)	Sigmoid Colon	8140/3: Adenocarcinoma, NOS	C18.7-Sigmoid colon	Moderately differentiated; Grade II	Blank(s)	I	Blank(s)	Blank(s)	T1	Blank(s)	Blank(s)	N0	30	4 or more regional lymph nodes removed	Blank(s)	Blank(s)	15	160	3	0	3	5	0	20	No radiation and/or cancer-directed surgery	None	Alive or dead of other cause	Alive or dead due to cancer	104	Alive	One primary only	April	No/Unknown
4525396	2005	Male	80	White	Married (including common law)	Ascending Colon	8140/3: Adenocarcinoma, NOS	C18.2-Ascending colon	Moderately differentiated; Grade II	Blank(s)	IIIB	Blank(s)	Blank(s)	T3	Blank(s)	Blank(s)	N1	40	4 or more regional lymph nodes removed	Blank(s)	Blank(s)	38	450	3	100	3	7	1	999	No radiation and/or cancer-directed surgery	None	Dead (attributable to this cancer dx)	Alive or dead due to cancer	78	Colon excluding Rectum	One primary only	January	No/Unknown
4525405	2005	Female	50	Black	Single (never married)	Transverse Colon	8140/3: Adenocarcinoma, NOS	C18.4-Transverse colon	Moderately differentiated; Grade II	Blank(s)	I	Blank(s)	Blank(s)	T1	Blank(s)	Blank(s)	N0	30	4 or more regional lymph nodes removed	Blank(s)	Blank(s)	20	160	3	0	3	5	0	20	No radiation and/or cancer-directed surgery	None	Alive or dead of other cause	Alive or dead due to cancer	106	Alive	One primary only	February	No/Unknown
4525414	2005	Male	75	Black	Separated	Appendix	8140/3: Adenocarcinoma, NOS	C18.1-Appendix	Moderately differentiated; Grade II	Blank(s)	IIB	Blank(s)	Blank(s)	T4	Blank(s)	Blank(s)	N0	0	None	Blank(s)	Blank(s)	999	570	1	0	0	0	98	998	No radiation and/or cancer-directed surgery	None	Dead (attributable to this cancer dx)	Alive or dead due to cancer	5	Colon excluding Rectum	One primary only	May	No/Unknown
4525418	2005	Female	57	White	Divorced	Cecum	8140/3: Adenocarcinoma, NOS	C18.0-Cecum	Moderately differentiated; Grade II	Blank(s)	IIIC	Blank(s)	Blank(s)	T3	Blank(s)	Blank(s)	N2	40	4 or more regional lymph nodes removed	Blank(s)	Blank(s)	25	400	3	100	3	56	9	10	No radiation and/or cancer-directed surgery	None	Dead (attributable to this cancer dx)	Alive or dead due to cancer	44	Colon excluding Rectum	One primary only	April	Yes
4525426	2005	Female	60	Asian or Pacific Islander	Married (including common law)	Splenic Flexure	8140/3: Adenocarcinoma, NOS	C18.5-Splenic flexure of colon	Moderately differentiated; Grade II	Blank(s)	IIA	Blank(s)	Blank(s)	T3	Blank(s)	Blank(s)	N0	40	4 or more regional lymph nodes removed	Blank(s)	Blank(s)	24	450	3	0	3	13	0	20	No radiation and/or cancer-directed surgery	None	Alive or dead of other cause	Alive or dead due to cancer	107	Alive	One primary only	January	No/Unknown
4525427	2005	Female	72	Asian or Pacific Islander	Married (including common law)	Ascending Colon	8140/3: Adenocarcinoma, NOS	C18.2-Ascending colon	Moderately differentiated; Grade II	Blank(s)	I	Blank(s)	Blank(s)	T1	Blank(s)	Blank(s)	N0	30	4 or more regional lymph nodes removed	Blank(s)	Blank(s)	20	160	3	0	3	5	0	999	No radiation and/or cancer-directed surgery	None	Alive or dead of other cause	Alive or dead due to cancer	107	Alive	One primary only	January	No/Unknown
4525446	2005	Male	71	Asian or Pacific Islander	Married (including common law)	Sigmoid Colon	8140/3: Adenocarcinoma, NOS	C18.7-Sigmoid colon	Moderately differentiated; Grade II	Blank(s)	IIA	Blank(s)	Blank(s)	T3	Blank(s)	Blank(s)	N0	30	4 or more regional lymph nodes removed	Blank(s)	Blank(s)	40	400	3	0	3	17	0	20	No radiation and/or cancer-directed surgery	None	Alive or dead of other cause	Alive or dead due to cancer	105	Alive	One primary only	March	No/Unknown
4525449	2005	Female	70	Asian or Pacific Islander	Widowed	Sigmoid Colon	8140/3: Adenocarcinoma, NOS	C18.7-Sigmoid colon	Moderately differentiated; Grade II	Blank(s)	IIIB	Blank(s)	Blank(s)	T3	Blank(s)	Blank(s)	N1	30	4 or more regional lymph nodes removed	Blank(s)	Blank(s)	30	450	3	300	3	97	97	999	No radiation and/or cancer-directed surgery	None	Dead (attributable to this cancer dx)	Alive or dead due to cancer	22	Colon excluding Rectum	One primary only	April	Yes
4525453	2005	Male	73	Asian or Pacific Islander	Married (including common law)	Sigmoid Colon	8140/3: Adenocarcinoma, NOS	C18.7-Sigmoid colon	Moderately differentiated; Grade II	Blank(s)	IIIB	Blank(s)	Blank(s)	T3	Blank(s)	Blank(s)	N1	30	4 or more regional lymph nodes removed	Blank(s)	Blank(s)	25	450	3	300	3	5	2	10	No radiation and/or cancer-directed surgery	None	Dead (attributable to this cancer dx)	Alive or dead due to cancer	66	Colon excluding Rectum	One primary only	May	Yes
4525458	2005	Female	65	Asian or Pacific Islander	Single (never married)	Cecum	8480/3: Mucinous adenocarcinoma	C18.0-Cecum	Moderately differentiated; Grade II	Blank(s)	IIB	Blank(s)	Blank(s)	T4	Blank(s)	Blank(s)	N0	30	4 or more regional lymph nodes removed	Blank(s)	Blank(s)	40	500	3	0	3	14	0	20	No radiation and/or cancer-directed surgery	None	Alive or dead of other cause	Alive or dead due to cancer	2	Alive	One primary only	July	No/Unknown
4525597	2005	Male	33	Asian or Pacific Islander	Married (including common law)	Ascending Colon	8480/3: Mucinous adenocarcinoma	C18.2-Ascending colon	Poorly differentiated; Grade III	Blank(s)	IIA	Blank(s)	Blank(s)	T3	Blank(s)	Blank(s)	N0	40	4 or more regional lymph nodes removed	Blank(s)	Blank(s)	50	400	3	0	3	40	0	999	No radiation and/or cancer-directed surgery	None	Alive or dead of other cause	Alive or dead due to cancer	102	Alive	One primary only	June	Yes
4525603	2005	Female	76	White	Single (never married)	Ascending Colon	8140/3: Adenocarcinoma, NOS	C18.2-Ascending colon	Moderately differentiated; Grade II	Blank(s)	IIA	Blank(s)	Blank(s)	T3	Blank(s)	Blank(s)	N0	40	4 or more regional lymph nodes removed	Blank(s)	Blank(s)	50	400	3	0	3	16	0	20	No radiation and/or cancer-directed surgery	None	Alive or dead of other cause	Alive or dead due to cancer	64	Alive	One primary only	July	No/Unknown
4525607	2005	Female	75	Asian or Pacific Islander	Widowed	Rectum	8140/3: Adenocarcinoma, NOS	C20.9-Rectum, NOS	Well differentiated; Grade I	Blank(s)	I	Blank(s)	Blank(s)	T2	Blank(s)	Blank(s)	N0	30	4 or more regional lymph nodes removed	Blank(s)	Blank(s)	10	200	3	0	3	8	0	999	No radiation and/or cancer-directed surgery	None	Alive or dead of other cause	Alive or dead due to cancer	101	Alive	One primary only	July	No/Unknown
4525630	2005	Male	40	White	Married (including common law)	Sigmoid Colon	8140/3: Adenocarcinoma, NOS	C18.7-Sigmoid colon	Moderately differentiated; Grade II	Blank(s)	IIIB	Blank(s)	Blank(s)	T3	Blank(s)	Blank(s)	N1	60	4 or more regional lymph nodes removed	Blank(s)	Blank(s)	45	450	3	100	3	14	2	999	No radiation and/or cancer-directed surgery	None	Alive or dead of other cause	Alive or dead due to cancer	106	Alive	One primary only	February	Yes
4525637	2005	Female	74	White	Married (including common law)	Ascending Colon	8140/3: Adenocarcinoma, NOS	C18.2-Ascending colon	Well differentiated; Grade I	Blank(s)	I	Blank(s)	Blank(s)	T2	Blank(s)	Blank(s)	N0	0	None	Blank(s)	Blank(s)	25	200	3	0	0	11	0	999	No radiation and/or cancer-directed surgery	None	Alive or dead of other cause	Alive or dead due to cancer	106	Alive	One primary only	February	No/Unknown
4525680	2005	Male	70	White	Married (including common law)	Rectum	8140/3: Adenocarcinoma, NOS	C20.9-Rectum, NOS	Moderately differentiated; Grade II	Blank(s)	IIA	Blank(s)	Blank(s)	T3	Blank(s)	Blank(s)	N0	30	4 or more regional lymph nodes removed	Blank(s)	Blank(s)	11	450	3	0	3	5	0	998	Radiation prior to surgery	Beam radiation	Alive or dead of other cause	Alive or dead due to cancer	100	Alive	One primary only	August	Yes
4525694	2005	Male	80	White	Married (including common law)	Ascending Colon	8140/3: Adenocarcinoma, NOS	C18.2-Ascending colon	Moderately differentiated; Grade II	Blank(s)	IIA	Blank(s)	Blank(s)	T3	Blank(s)	Blank(s)	N0	30	4 or more regional lymph nodes removed	Blank(s)	Blank(s)	45	450	3	0	3	8	0	998	No radiation and/or cancer-directed surgery	None	Dead (attributable to this cancer dx)	Alive or dead due to cancer	42	Colon excluding Rectum	One primary only	August	No/Unknown
4525782	2004	Female	49	Black	Single (never married)	Cecum	8140/3: Adenocarcinoma, NOS	C18.0-Cecum	Moderately differentiated; Grade II	Blank(s)	IIIB	Blank(s)	Blank(s)	T3	Blank(s)	Blank(s)	N1	40	4 or more regional lymph nodes removed	Blank(s)	Blank(s)	999	450	3	300	3	17	3	10	No radiation and/or cancer-directed surgery	None	Alive or dead of other cause	Dead (attributable to causes other than this cancer dx)	42	State DC not available or state DC available but no COD	One primary only	October	Yes
4525867	2004	Female	44	Asian or Pacific Islander	Married (including common law)	Sigmoid Colon	8140/3: Adenocarcinoma, NOS	C18.7-Sigmoid colon	Moderately differentiated; Grade II	Blank(s)	IIIC	Blank(s)	Blank(s)	T3	Blank(s)	Blank(s)	N2	30	4 or more regional lymph nodes removed	Blank(s)	Blank(s)	45	400	3	300	3	22	7	999	No radiation and/or cancer-directed surgery	None	Alive or dead of other cause	Alive or dead due to cancer	107	Alive	One primary only	March	No/Unknown
4526058	2005	Female	67	Asian or Pacific Islander	Married (including common law)	Splenic Flexure	8140/3: Adenocarcinoma, NOS	C18.5-Splenic flexure of colon	Moderately differentiated; Grade II	Blank(s)	IIA	Blank(s)	Blank(s)	T3	Blank(s)	Blank(s)	N0	30	4 or more regional lymph nodes removed	Blank(s)	Blank(s)	28	450	3	0	3	8	0	999	No radiation and/or cancer-directed surgery	None	Alive or dead of other cause	Alive or dead due to cancer	98	Alive	One primary only	July	No/Unknown
4526066	2005	Male	60	White	Married (including common law)	Rectum	8140/3: Adenocarcinoma, NOS	C20.9-Rectum, NOS	Moderately differentiated; Grade II	Blank(s)	IIIB	Blank(s)	Blank(s)	T3	Blank(s)	Blank(s)	N1	30	4 or more regional lymph nodes removed	Blank(s)	Blank(s)	65	450	3	100	3	22	2	10	No radiation and/or cancer-directed surgery	None	Alive or dead of other cause	Alive or dead due to cancer	106	Alive	One primary only	February	Yes
4526069	2005	Male	62	White	Single (never married)	Rectum	8480/3: Mucinous adenocarcinoma	C20.9-Rectum, NOS	Moderately differentiated; Grade II	Blank(s)	IIIB	Blank(s)	Blank(s)	T3	Blank(s)	Blank(s)	N1	30	4 or more regional lymph nodes removed	Blank(s)	Blank(s)	999	450	6	100	6	9	3	998	Radiation prior to surgery	Beam radiation	Alive or dead of other cause	Alive or dead due to cancer	105	Alive	One primary only	March	Yes
4526071	2005	Female	68	Asian or Pacific Islander	Widowed	Rectum	8140/3: Adenocarcinoma, NOS	C20.9-Rectum, NOS	Poorly differentiated; Grade III	Blank(s)	IIIC	Blank(s)	Blank(s)	T3	Blank(s)	Blank(s)	N2	30	4 or more regional lymph nodes removed	Blank(s)	Blank(s)	55	400	3	300	3	51	14	998	Radiation after surgery	Beam radiation	Dead (attributable to this cancer dx)	Alive or dead due to cancer	12	Colon excluding Rectum	One primary only	March	Yes
4526073	2005	Male	60	White	Married (including common law)	Rectum	8140/3: Adenocarcinoma, NOS	C20.9-Rectum, NOS	Moderately differentiated; Grade II	Blank(s)	IIA	Blank(s)	Blank(s)	T3	Blank(s)	Blank(s)	N0	30	4 or more regional lymph nodes removed	Blank(s)	Blank(s)	55	400	3	0	3	14	0	998	Radiation after surgery	Beam radiation	Dead (attributable to this cancer dx)	Alive or dead due to cancer	98	Rectum and Rectosigmoid Junction	One primary only	June	Yes
4526078	2005	Male	58	White	Divorced	Rectosigmoid Junction	8140/3: Adenocarcinoma, NOS	C19.9-Rectosigmoid junction	Moderately differentiated; Grade II	Blank(s)	IIA	Blank(s)	Blank(s)	T3	Blank(s)	Blank(s)	N0	30	4 or more regional lymph nodes removed	Blank(s)	Blank(s)	60	460	0	0	3	12	0	20	No radiation and/or cancer-directed surgery	None	Dead (attributable to this cancer dx)	Alive or dead due to cancer	31	Colon excluding Rectum	One primary only	June	No/Unknown
4526079	2005	Male	48	Black	Single (never married)	Rectum	8140/3: Adenocarcinoma, NOS	C20.9-Rectum, NOS	Moderately differentiated; Grade II	Blank(s)	I	Blank(s)	Blank(s)	T1	Blank(s)	Blank(s)	N0	30	None	Blank(s)	Blank(s)	30	300	3	0	0	0	98	30	No radiation and/or cancer-directed surgery	None	Alive or dead of other cause	Alive or dead due to cancer	103	Alive	One primary only	May	No/Unknown
4526375	2005	Female	80	White	Widowed	Cecum	8140/3: Adenocarcinoma, NOS	C18.0-Cecum	Moderately differentiated; Grade II	Blank(s)	I	Blank(s)	Blank(s)	T2	Blank(s)	Blank(s)	N0	40	1 to 3 regional lymph nodes removed	Blank(s)	Blank(s)	15	200	3	0	3	2	0	999	No radiation and/or cancer-directed surgery	None	Dead (attributable to this cancer dx)	Alive or dead due to cancer	18	Colon excluding Rectum	One primary only	September	No/Unknown
4526380	2005	Female	50	White	Single (never married)	Transverse Colon	8140/3: Adenocarcinoma, NOS	C18.4-Transverse colon	Moderately differentiated; Grade II	Blank(s)	I	Blank(s)	Blank(s)	T2	Blank(s)	Blank(s)	N0	30	4 or more regional lymph nodes removed	Blank(s)	Blank(s)	25	200	3	0	3	11	0	999	No radiation and/or cancer-directed surgery	None	Alive or dead of other cause	Alive or dead due to cancer	100	Alive	One primary only	August	No/Unknown
4526578	2005	Female	65	Asian or Pacific Islander	Married (including common law)	Rectum	8140/3: Adenocarcinoma, NOS	C20.9-Rectum, NOS	Poorly differentiated; Grade III	Blank(s)	IIIC	Blank(s)	Blank(s)	T3	Blank(s)	Blank(s)	N2	30	4 or more regional lymph nodes removed	Blank(s)	Blank(s)	27	400	3	200	3	12	5	20	Radiation after surgery	Beam radiation	Alive or dead of other cause	Alive or dead due to cancer	101	Alive	One primary only	July	Yes
4526754	2005	Female	70	Asian or Pacific Islander	Widowed	Cecum	8140/3: Adenocarcinoma, NOS	C18.0-Cecum	Moderately differentiated; Grade II	Blank(s)	IIA	Blank(s)	Blank(s)	T3	Blank(s)	Blank(s)	N0	40	4 or more regional lymph nodes removed	Blank(s)	Blank(s)	24	450	3	0	3	10	0	20	No radiation and/or cancer-directed surgery	None	Alive or dead of other cause	Alive or dead due to cancer	106	Alive	One primary only	February	No/Unknown
4526796	2005	Female	76	White	Married (including common law)	Ascending Colon	8140/3: Adenocarcinoma, NOS	C18.2-Ascending colon	Moderately differentiated; Grade II	Blank(s)	I	Blank(s)	Blank(s)	T2	Blank(s)	Blank(s)	N0	40	4 or more regional lymph nodes removed	Blank(s)	Blank(s)	90	200	3	0	3	16	0	20	No radiation and/or cancer-directed surgery	None	Alive or dead of other cause	Alive or dead due to cancer	107	Alive	One primary only	January	No/Unknown
4526925	2005	Female	67	Black	Married (including common law)	Sigmoid Colon	8140/3: Adenocarcinoma, NOS	C18.7-Sigmoid colon	Moderately differentiated; Grade II	Blank(s)	IIA	Blank(s)	Blank(s)	T3	Blank(s)	Blank(s)	N0	30	4 or more regional lymph nodes removed	Blank(s)	Blank(s)	50	450	3	0	3	10	0	20	No radiation and/or cancer-directed surgery	None	Alive or dead of other cause	Alive or dead due to cancer	101	Alive	One primary only	July	No/Unknown
4527402	2005	Male	67	Asian or Pacific Islander	Married (including common law)	Rectum	8140/3: Adenocarcinoma, NOS	C20.9-Rectum, NOS	Moderately differentiated; Grade II	Blank(s)	I	Blank(s)	Blank(s)	T1	Blank(s)	Blank(s)	N0	0	None	Blank(s)	Blank(s)	49	300	1	0	0	0	98	998	No radiation and/or cancer-directed surgery	None	Alive or dead of other cause	Dead (attributable to causes other than this cancer dx)	59	State DC not available or state DC available but no COD	One primary only	July	No/Unknown
4527451	2005	Female	64	White	Married (including common law)	Hepatic Flexure	8480/3: Mucinous adenocarcinoma	C18.3-Hepatic flexure of colon	Poorly differentiated; Grade III	Blank(s)	IIIB	Blank(s)	Blank(s)	T3	Blank(s)	Blank(s)	N1	40	4 or more regional lymph nodes removed	Blank(s)	Blank(s)	50	400	3	100	3	23	3	999	No radiation and/or cancer-directed surgery	None	Alive or dead of other cause	Alive or dead due to cancer	99	Alive	One primary only	September	Yes
4527510	2005	Female	76	White	Married (including common law)	Descending Colon	8140/3: Adenocarcinoma, NOS	C18.6-Descending colon	Well differentiated; Grade I	Blank(s)	I	Blank(s)	Blank(s)	T1	Blank(s)	Blank(s)	N0	40	4 or more regional lymph nodes removed	Blank(s)	Blank(s)	20	160	3	0	3	16	0	999	No radiation and/or cancer-directed surgery	None	Alive or dead of other cause	Alive or dead due to cancer	98	Alive	One primary only	October	No/Unknown
4527524	2005	Male	51	White	Married (including common law)	Sigmoid Colon	8140/3: Adenocarcinoma, NOS	C18.7-Sigmoid colon	Moderately differentiated; Grade II	Blank(s)	IIIC	Blank(s)	Blank(s)	T3	Blank(s)	Blank(s)	N2	30	4 or more regional lymph nodes removed	Blank(s)	Blank(s)	40	450	3	100	3	8	4	10	No radiation and/or cancer-directed surgery	None	Dead (attributable to this cancer dx)	Alive or dead due to cancer	47	Colon excluding Rectum	One primary only	March	Yes
4527586	2005	Male	56	White	Married (including common law)	Appendix	8140/3: Adenocarcinoma, NOS	C18.1-Appendix	Moderately differentiated; Grade II	Blank(s)	I	Blank(s)	Blank(s)	T2	Blank(s)	Blank(s)	N0	40	4 or more regional lymph nodes removed	Blank(s)	Blank(s)	29	200	3	0	3	19	0	998	No radiation and/or cancer-directed surgery	None	Alive or dead of other cause	Alive or dead due to cancer	103	Alive	One primary only	May	No/Unknown
4527610	2005	Male	58	White	Single (never married)	Sigmoid Colon	8140/3: Adenocarcinoma, NOS	C18.7-Sigmoid colon	Moderately differentiated; Grade II	Blank(s)	IIIC	Blank(s)	Blank(s)	T4	Blank(s)	Blank(s)	N2	30	4 or more regional lymph nodes removed	Blank(s)	Blank(s)	45	500	3	100	3	25	5	998	Radiation after surgery	Beam radiation	Dead (attributable to this cancer dx)	Alive or dead due to cancer	35	Colon excluding Rectum	One primary only	April	Yes
4527668	2005	Male	61	White	Married (including common law)	Rectosigmoid Junction	8140/3: Adenocarcinoma, NOS	C19.9-Rectosigmoid junction	Well differentiated; Grade I	Blank(s)	IIIC	Blank(s)	Blank(s)	T3	Blank(s)	Blank(s)	N2	30	4 or more regional lymph nodes removed	Blank(s)	Blank(s)	21	450	3	100	3	9	4	10	No radiation and/or cancer-directed surgery	None	Alive or dead of other cause	Alive or dead due to cancer	102	Alive	One primary only	June	Yes
4527706	2005	Male	57	White	Married (including common law)	Rectosigmoid Junction	8140/3: Adenocarcinoma, NOS	C19.9-Rectosigmoid junction	Well differentiated; Grade I	Blank(s)	IIIC	Blank(s)	Blank(s)	T3	Blank(s)	Blank(s)	N2	30	4 or more regional lymph nodes removed	Blank(s)	Blank(s)	38	450	3	100	3	13	6	999	Radiation after surgery	Beam radiation	Alive or dead of other cause	Alive or dead due to cancer	98	Alive	One primary only	October	Yes
4527758	2005	Male	73	White	Widowed	Rectum	8140/3: Adenocarcinoma, NOS	C20.9-Rectum, NOS	Moderately differentiated; Grade II	Blank(s)	IIIA	Blank(s)	Blank(s)	T2	Blank(s)	Blank(s)	N1	50	4 or more regional lymph nodes removed	Blank(s)	Blank(s)	999	200	6	300	5	6	0	10	Radiation prior to surgery	Radiation, NOS method or source not specified	Alive or dead of other cause	Alive or dead due to cancer	105	Alive	One primary only	March	Yes
4527833	2005	Female	73	White	Widowed	Ascending Colon	8140/3: Adenocarcinoma, NOS	C18.2-Ascending colon	Moderately differentiated; Grade II	Blank(s)	IIA	Blank(s)	Blank(s)	T3	Blank(s)	Blank(s)	N0	40	4 or more regional lymph nodes removed	Blank(s)	Blank(s)	999	450	3	0	3	13	0	10	No radiation and/or cancer-directed surgery	None	Alive or dead of other cause	Dead (attributable to causes other than this cancer dx)	82	Other Cause of Death	One primary only	August	No/Unknown
4527838	2005	Male	71	White	Single (never married)	Cecum	8140/3: Adenocarcinoma, NOS	C18.0-Cecum	Poorly differentiated; Grade III	Blank(s)	I	Blank(s)	Blank(s)	T2	Blank(s)	Blank(s)	N0	40	4 or more regional lymph nodes removed	Blank(s)	Blank(s)	999	200	3	0	3	10	0	20	No radiation and/or cancer-directed surgery	None	Alive or dead of other cause	Alive or dead due to cancer	100	Alive	One primary only	August	No/Unknown
4527842	2005	Female	63	White	Married (including common law)	Sigmoid Colon	8140/3: Adenocarcinoma, NOS	C18.7-Sigmoid colon	Moderately differentiated; Grade II	Blank(s)	IIA	Blank(s)	Blank(s)	T3	Blank(s)	Blank(s)	N0	30	4 or more regional lymph nodes removed	Blank(s)	Blank(s)	999	400	3	0	3	19	0	10	No radiation and/or cancer-directed surgery	None	Alive or dead of other cause	Dead (attributable to causes other than this cancer dx)	8	Diseases of Heart	One primary only	July	No/Unknown
4527886	2005	Female	74	White	Married (including common law)	Splenic Flexure	8140/3: Adenocarcinoma, NOS	C18.5-Splenic flexure of colon	Poorly differentiated; Grade III	Blank(s)	IIIC	Blank(s)	Blank(s)	T3	Blank(s)	Blank(s)	N2	30	4 or more regional lymph nodes removed	Blank(s)	Blank(s)	999	400	3	300	3	13	9	20	No radiation and/or cancer-directed surgery	None	Alive or dead of other cause	Alive or dead due to cancer	101	Alive	One primary only	July	Yes
4527927	2005	Male	60	Asian or Pacific Islander	Married (including common law)	Descending Colon	8140/3: Adenocarcinoma, NOS	C18.6-Descending colon	Well differentiated; Grade I	Blank(s)	IIB	Blank(s)	Blank(s)	T4	Blank(s)	Blank(s)	N0	40	4 or more regional lymph nodes removed	Blank(s)	Blank(s)	45	550	3	0	3	10	0	10	No radiation and/or cancer-directed surgery	None	Alive or dead of other cause	Alive or dead due to cancer	101	Alive	One primary only	July	No/Unknown
4527934	2005	Male	74	Asian or Pacific Islander	Married (including common law)	Rectum	8480/3: Mucinous adenocarcinoma	C20.9-Rectum, NOS	Moderately differentiated; Grade II	Blank(s)	IIIC	Blank(s)	Blank(s)	T4	Blank(s)	Blank(s)	N2	30	4 or more regional lymph nodes removed	Blank(s)	Blank(s)	15	550	6	100	6	11	4	10	Radiation prior to surgery	Beam radiation	Dead (attributable to this cancer dx)	Alive or dead due to cancer	66	Colon excluding Rectum	One primary only	October	Yes
4528126	2005	Male	72	Black	Married (including common law)	Sigmoid Colon	8140/3: Adenocarcinoma, NOS	C18.7-Sigmoid colon	Moderately differentiated; Grade II	Blank(s)	IIIC	Blank(s)	Blank(s)	T3	Blank(s)	Blank(s)	N2	30	4 or more regional lymph nodes removed	Blank(s)	Blank(s)	999	400	6	300	6	11	8	10	No radiation and/or cancer-directed surgery	None	Dead (attributable to this cancer dx)	Alive or dead due to cancer	41	Colon excluding Rectum	One primary only	August	Yes
4528948	2005	Male	62	Asian or Pacific Islander	Married (including common law)	Sigmoid Colon	8140/3: Adenocarcinoma, NOS	C18.7-Sigmoid colon	Moderately differentiated; Grade II	Blank(s)	IIIA	Blank(s)	Blank(s)	T1	Blank(s)	Blank(s)	N1	30	4 or more regional lymph nodes removed	Blank(s)	Blank(s)	8	150	3	100	3	5	2	999	No radiation and/or cancer-directed surgery	None	Alive or dead of other cause	Alive or dead due to cancer	102	Alive	One primary only	June	Yes
4529060	2005	Female	58	White	Single (never married)	Cecum	8140/3: Adenocarcinoma, NOS	C18.0-Cecum	Moderately differentiated; Grade II	Blank(s)	IIA	Blank(s)	Blank(s)	T3	Blank(s)	Blank(s)	N0	40	4 or more regional lymph nodes removed	Blank(s)	Blank(s)	54	400	3	0	3	21	0	998	No radiation and/or cancer-directed surgery	None	Alive or dead of other cause	Alive or dead due to cancer	102	Alive	One primary only	June	No/Unknown
4529074	2005	Female	69	White	Married (including common law)	Ascending Colon	8140/3: Adenocarcinoma, NOS	C18.2-Ascending colon	Moderately differentiated; Grade II	Blank(s)	IIIB	Blank(s)	Blank(s)	T3	Blank(s)	Blank(s)	N1	40	4 or more regional lymph nodes removed	Blank(s)	Blank(s)	48	400	3	300	3	24	3	20	No radiation and/or cancer-directed surgery	None	Alive or dead of other cause	Alive or dead due to cancer	98	Alive	One primary only	October	Yes
4529082	2005	Female	70	White	Single (never married)	Transverse Colon	8140/3: Adenocarcinoma, NOS	C18.4-Transverse colon	Moderately differentiated; Grade II	Blank(s)	IIB	Blank(s)	Blank(s)	T4	Blank(s)	Blank(s)	N0	40	4 or more regional lymph nodes removed	Blank(s)	Blank(s)	32	500	3	0	3	27	0	998	No radiation and/or cancer-directed surgery	None	Alive or dead of other cause	Alive or dead due to cancer	2	Alive	One primary only	October	No/Unknown
4529083	2005	Male	47	White	Single (never married)	Sigmoid Colon	8140/3: Adenocarcinoma, NOS	C18.7-Sigmoid colon	Moderately differentiated; Grade II	Blank(s)	IIA	Blank(s)	Blank(s)	T3	Blank(s)	Blank(s)	N0	30	4 or more regional lymph nodes removed	Blank(s)	Blank(s)	60	450	3	0	3	20	0	10	No radiation and/or cancer-directed surgery	None	Alive or dead of other cause	Alive or dead due to cancer	79	Alive	One primary only	November	Yes
4529103	2005	Female	77	White	Widowed	Large Intestine, NOS	8140/3: Adenocarcinoma, NOS	C18.8-Overlapping lesion of colon	Poorly differentiated; Grade III	Blank(s)	I	Blank(s)	Blank(s)	T2	Blank(s)	Blank(s)	N0	40	4 or more regional lymph nodes removed	Blank(s)	Blank(s)	35	200	3	0	3	16	0	10	No radiation and/or cancer-directed surgery	None	Alive or dead of other cause	Dead (attributable to causes other than this cancer dx)	60	Diseases of Heart	One primary only	April	No/Unknown
4529126	2005	Male	73	White	Married (including common law)	Ascending Colon	8140/3: Adenocarcinoma, NOS	C18.2-Ascending colon	Moderately differentiated; Grade II	Blank(s)	I	Blank(s)	Blank(s)	T1	Blank(s)	Blank(s)	N0	40	4 or more regional lymph nodes removed	Blank(s)	Blank(s)	17	160	3	0	3	16	0	998	No radiation and/or cancer-directed surgery	None	Alive or dead of other cause	Alive or dead due to cancer	103	Alive	One primary only	May	No/Unknown
4529128	2005	Female	59	Asian or Pacific Islander	Married (including common law)	Ascending Colon	8140/3: Adenocarcinoma, NOS	C18.2-Ascending colon	Moderately differentiated; Grade II	Blank(s)	IIA	Blank(s)	Blank(s)	T3	Blank(s)	Blank(s)	N0	40	4 or more regional lymph nodes removed	Blank(s)	Blank(s)	70	450	3	0	3	17	0	10	No radiation and/or cancer-directed surgery	None	Alive or dead of other cause	Alive or dead due to cancer	102	Alive	One primary only	June	Yes
4529129	2005	Male	71	White	Married (including common law)	Transverse Colon	8140/3: Adenocarcinoma, NOS	C18.4-Transverse colon	Moderately differentiated; Grade II	Blank(s)	IIA	Blank(s)	Blank(s)	T3	Blank(s)	Blank(s)	N0	30	4 or more regional lymph nodes removed	Blank(s)	Blank(s)	55	450	3	0	3	14	0	998	No radiation and/or cancer-directed surgery	None	Alive or dead of other cause	Alive or dead due to cancer	102	Alive	One primary only	June	No/Unknown
4529456	2005	Female	57	Asian or Pacific Islander	Married (including common law)	Rectum	8140/3: Adenocarcinoma, NOS	C20.9-Rectum, NOS	Moderately differentiated; Grade II	Blank(s)	IIB	Blank(s)	Blank(s)	T4	Blank(s)	Blank(s)	N0	30	1 to 3 regional lymph nodes removed	Blank(s)	Blank(s)	50	500	5	0	6	3	0	20	Radiation prior to surgery	Beam radiation	Alive or dead of other cause	Alive or dead due to cancer	100	Alive	One primary only	August	Yes
4529459	2005	Male	48	Asian or Pacific Islander	Married (including common law)	Rectum	8140/3: Adenocarcinoma, NOS	C20.9-Rectum, NOS	Moderately differentiated; Grade II	Blank(s)	I	Blank(s)	Blank(s)	T2	Blank(s)	Blank(s)	N0	50	4 or more regional lymph nodes removed	Blank(s)	Blank(s)	15	200	5	0	6	9	0	20	Radiation prior to surgery	Beam radiation	Alive or dead of other cause	Alive or dead due to cancer	100	Alive	One primary only	August	Yes
4529476	2005	Male	72	White	Single (never married)	Descending Colon	8140/3: Adenocarcinoma, NOS	C18.6-Descending colon	Moderately differentiated; Grade II	Blank(s)	IIA	Blank(s)	Blank(s)	T3	Blank(s)	Blank(s)	N0	40	1 to 3 regional lymph nodes removed	Blank(s)	Blank(s)	999	450	3	0	3	3	0	998	No radiation and/or cancer-directed surgery	None	Alive or dead of other cause	Alive or dead due to cancer	98	Alive	One primary only	October	No/Unknown
4529577	2005	Male	57	White	Divorced	Ascending Colon	8140/3: Adenocarcinoma, NOS	C18.2-Ascending colon	Well differentiated; Grade I	Blank(s)	IIIB	Blank(s)	Blank(s)	T3	Blank(s)	Blank(s)	N1	30	4 or more regional lymph nodes removed	Blank(s)	Blank(s)	15	400	3	200	3	22	1	20	No radiation and/or cancer-directed surgery	None	Alive or dead of other cause	Alive or dead due to cancer	100	Alive	One primary only	August	No/Unknown
4529642	2005	Male	55	White	Single (never married)	Ascending Colon	8140/3: Adenocarcinoma, NOS	C18.2-Ascending colon	Well differentiated; Grade I	Blank(s)	IIIC	Blank(s)	Blank(s)	T3	Blank(s)	Blank(s)	N2	40	4 or more regional lymph nodes removed	Blank(s)	Blank(s)	50	400	3	100	3	17	5	999	No radiation and/or cancer-directed surgery	None	Alive or dead of other cause	Alive or dead due to cancer	100	Alive	One primary only	August	Yes
4529648	2005	Male	53	Asian or Pacific Islander	Married (including common law)	Rectosigmoid Junction	8140/3: Adenocarcinoma, NOS	C19.9-Rectosigmoid junction	Well differentiated; Grade I	Blank(s)	I	Blank(s)	Blank(s)	T2	Blank(s)	Blank(s)	N0	30	4 or more regional lymph nodes removed	Blank(s)	Blank(s)	70	200	3	0	3	12	0	999	No radiation and/or cancer-directed surgery	None	Alive or dead of other cause	Alive or dead due to cancer	101	Alive	One primary only	July	No/Unknown
4529651	2005	Female	66	Asian or Pacific Islander	Married (including common law)	Descending Colon	8140/3: Adenocarcinoma, NOS	C18.6-Descending colon	Moderately differentiated; Grade II	Blank(s)	I	Blank(s)	Blank(s)	T2	Blank(s)	Blank(s)	N0	40	1 to 3 regional lymph nodes removed	Blank(s)	Blank(s)	37	200	3	0	3	13	0	999	No radiation and/or cancer-directed surgery	None	Alive or dead of other cause	Alive or dead due to cancer	87	Alive	One primary only	August	No/Unknown
4530167	2005	Female	55	Asian or Pacific Islander	Divorced	Ascending Colon	8140/3: Adenocarcinoma, NOS	C18.2-Ascending colon	Moderately differentiated; Grade II	Blank(s)	IIA	Blank(s)	Blank(s)	T3	Blank(s)	Blank(s)	N0	40	4 or more regional lymph nodes removed	Blank(s)	Blank(s)	40	450	3	0	3	15	0	999	No radiation and/or cancer-directed surgery	None	Alive or dead of other cause	Alive or dead due to cancer	87	Alive	One primary only	February	Yes
4530191	2005	Female	56	White	Married (including common law)	Rectosigmoid Junction	8140/3: Adenocarcinoma, NOS	C19.9-Rectosigmoid junction	Moderately differentiated; Grade II	Blank(s)	I	Blank(s)	Blank(s)	T2	Blank(s)	Blank(s)	N0	30	1 to 3 regional lymph nodes removed	Blank(s)	Blank(s)	999	200	3	0	3	2	0	20	No radiation and/or cancer-directed surgery	None	Alive or dead of other cause	Alive or dead due to cancer	107	Alive	One primary only	January	No/Unknown
4530218	2005	Male	69	Black	Married (including common law)	Splenic Flexure	8140/3: Adenocarcinoma, NOS	C18.5-Splenic flexure of colon	Moderately differentiated; Grade II	Blank(s)	IIA	Blank(s)	Blank(s)	T3	Blank(s)	Blank(s)	N0	40	4 or more regional lymph nodes removed	Blank(s)	Blank(s)	999	400	3	0	3	16	0	20	No radiation and/or cancer-directed surgery	Refused	Alive or dead of other cause	Dead (attributable to causes other than this cancer dx)	43	Septicemia	One primary only	February	No/Unknown
4530278	2005	Female	58	White	Married (including common law)	Ascending Colon	8140/3: Adenocarcinoma, NOS	C18.2-Ascending colon	Moderately differentiated; Grade II	Blank(s)	IIIC	Blank(s)	Blank(s)	T3	Blank(s)	Blank(s)	N2	30	4 or more regional lymph nodes removed	Blank(s)	Blank(s)	999	450	3	200	3	20	7	10	No radiation and/or cancer-directed surgery	None	Dead (attributable to this cancer dx)	Alive or dead due to cancer	18	Colon excluding Rectum	One primary only	February	Yes
4530299	2005	Female	26	White	Single (never married)	Ascending Colon	8481/3: Mucin-producing adenocarcinoma	C18.2-Ascending colon	Moderately differentiated; Grade II	Blank(s)	IIIB	Blank(s)	Blank(s)	T3	Blank(s)	Blank(s)	N1	40	4 or more regional lymph nodes removed	Blank(s)	Blank(s)	100	450	3	100	3	17	1	20	No radiation and/or cancer-directed surgery	None	Dead (attributable to this cancer dx)	Alive or dead due to cancer	16	Colon excluding Rectum	One primary only	March	Yes
4530332	2005	Female	63	White	Married (including common law)	Sigmoid Colon	8140/3: Adenocarcinoma, NOS	C18.7-Sigmoid colon	Moderately differentiated; Grade II	Blank(s)	IIA	Blank(s)	Blank(s)	T3	Blank(s)	Blank(s)	N0	30	1 to 3 regional lymph nodes removed	Blank(s)	Blank(s)	999	450	3	0	3	2	0	20	No radiation and/or cancer-directed surgery	None	Alive or dead of other cause	Alive or dead due to cancer	103	Alive	One primary only	May	Yes
4530334	2005	Female	75	White	Widowed	Transverse Colon	8140/3: Adenocarcinoma, NOS	C18.4-Transverse colon	Moderately differentiated; Grade II	Blank(s)	IIA	Blank(s)	Blank(s)	T3	Blank(s)	Blank(s)	N0	30	4 or more regional lymph nodes removed	Blank(s)	Blank(s)	999	400	3	0	3	10	0	20	No radiation and/or cancer-directed surgery	None	Dead (attributable to this cancer dx)	Alive or dead due to cancer	25	Colon excluding Rectum	One primary only	April	No/Unknown
4530430	2005	Female	67	White	Divorced	Hepatic Flexure	8140/3: Adenocarcinoma, NOS	C18.3-Hepatic flexure of colon	Well differentiated; Grade I	Blank(s)	I	Blank(s)	Blank(s)	T2	Blank(s)	Blank(s)	N0	40	4 or more regional lymph nodes removed	Blank(s)	Blank(s)	20	200	3	0	3	13	0	999	No radiation and/or cancer-directed surgery	None	Alive or dead of other cause	Alive or dead due to cancer	100	Alive	One primary only	August	No/Unknown
4530435	2005	Female	65	White	Married (including common law)	Transverse Colon	8140/3: Adenocarcinoma, NOS	C18.4-Transverse colon	Moderately differentiated; Grade II	Blank(s)	IIIA	Blank(s)	Blank(s)	T2	Blank(s)	Blank(s)	N1	51	4 or more regional lymph nodes removed	Blank(s)	Blank(s)	47	200	3	100	3	13	1	20	No radiation and/or cancer-directed surgery	None	Alive or dead of other cause	Alive or dead due to cancer	100	Alive	One primary only	August	Yes
4530447	2005	Male	67	White	Married (including common law)	Sigmoid Colon	8140/3: Adenocarcinoma, NOS	C18.7-Sigmoid colon	Moderately differentiated; Grade II	Blank(s)	IIIC	Blank(s)	Blank(s)	T4	Blank(s)	Blank(s)	N2	30	4 or more regional lymph nodes removed	Blank(s)	Blank(s)	50	500	3	100	3	12	7	10	No radiation and/or cancer-directed surgery	None	Alive or dead of other cause	Alive or dead due to cancer	97	Alive	One primary only	November	Yes
4530458	2005	Male	59	White	Married (including common law)	Rectum	8140/3: Adenocarcinoma, NOS	C20.9-Rectum, NOS	Moderately differentiated; Grade II	Blank(s)	IIIB	Blank(s)	Blank(s)	T3	Blank(s)	Blank(s)	N1	30	4 or more regional lymph nodes removed	Blank(s)	Blank(s)	50	450	5	300	5	21	0	10	Radiation prior to surgery	Radiation, NOS method or source not specified	Alive or dead of other cause	Alive or dead due to cancer	102	Alive	One primary only	June	Yes
4530491	2005	Female	76	White	Single (never married)	Rectum	8140/3: Adenocarcinoma, NOS	C20.9-Rectum, NOS	Moderately differentiated; Grade II	Blank(s)	I	Blank(s)	Blank(s)	T1	Blank(s)	Blank(s)	N0	27	None	Blank(s)	Blank(s)	23	160	3	0	0	0	98	20	Radiation after surgery	Beam radiation	Alive or dead of other cause	Alive or dead due to cancer	97	Alive	One primary only	November	Yes
4530494	2005	Male	74	White	Married (including common law)	Rectum	8480/3: Mucinous adenocarcinoma	C20.9-Rectum, NOS	Moderately differentiated; Grade II	Blank(s)	IIIB	Blank(s)	Blank(s)	T3	Blank(s)	Blank(s)	N1	30	4 or more regional lymph nodes removed	Blank(s)	Blank(s)	12	400	5	100	5	7	0	20	Radiation prior to surgery	Beam radiation	Alive or dead of other cause	Dead (attributable to causes other than this cancer dx)	11	Symptoms, Signs and Ill-Defined Conditions	One primary only	December	Yes
4530977	2005	Female	60	White	Single (never married)	Cecum	8140/3: Adenocarcinoma, NOS	C18.0-Cecum	Moderately differentiated; Grade II	Blank(s)	IIA	Blank(s)	Blank(s)	T3	Blank(s)	Blank(s)	N0	30	4 or more regional lymph nodes removed	Blank(s)	Blank(s)	50	400	3	0	3	18	0	20	No radiation and/or cancer-directed surgery	None	Alive or dead of other cause	Alive or dead due to cancer	100	Alive	One primary only	August	No/Unknown
4531127	2005	Male	70	Asian or Pacific Islander	Married (including common law)	Transverse Colon	8140/3: Adenocarcinoma, NOS	C18.4-Transverse colon	Poorly differentiated; Grade III	Blank(s)	IIIC	Blank(s)	Blank(s)	T3	Blank(s)	Blank(s)	N2	30	4 or more regional lymph nodes removed	Blank(s)	Blank(s)	70	450	3	100	3	8	6	20	No radiation and/or cancer-directed surgery	None	Dead (attributable to this cancer dx)	Alive or dead due to cancer	26	Colon excluding Rectum	One primary only	September	Yes
4531136	2005	Male	78	Asian or Pacific Islander	Married (including common law)	Ascending Colon	8140/3: Adenocarcinoma, NOS	C18.2-Ascending colon	Moderately differentiated; Grade II	Blank(s)	IIA	Blank(s)	Blank(s)	T3	Blank(s)	Blank(s)	N0	30	4 or more regional lymph nodes removed	Blank(s)	Blank(s)	40	450	3	0	3	9	0	999	No radiation and/or cancer-directed surgery	None	Alive or dead of other cause	Alive or dead due to cancer	100	Alive	One primary only	August	No/Unknown
4531346	2005	Female	78	White	Widowed	Rectosigmoid Junction	8140/3: Adenocarcinoma, NOS	C19.9-Rectosigmoid junction	Moderately differentiated; Grade II	Blank(s)	I	Blank(s)	Blank(s)	T2	Blank(s)	Blank(s)	N0	30	4 or more regional lymph nodes removed	Blank(s)	Blank(s)	32	200	3	0	3	5	0	998	No radiation and/or cancer-directed surgery	None	Alive or dead of other cause	Dead (attributable to causes other than this cancer dx)	61	Cerebrovascular Diseases	One primary only	January	No/Unknown
4531379	2005	Male	46	White	Married (including common law)	Rectum	8140/3: Adenocarcinoma, NOS	C20.9-Rectum, NOS	Poorly differentiated; Grade III	Blank(s)	I	Blank(s)	Blank(s)	T1	Blank(s)	Blank(s)	N0	30	4 or more regional lymph nodes removed	Blank(s)	Blank(s)	999	160	3	0	3	8	0	998	Radiation after surgery	Beam radiation	Alive or dead of other cause	Alive or dead due to cancer	104	Alive	One primary only	April	No/Unknown
4531391	2005	Female	76	Asian or Pacific Islander	Married (including common law)	Rectum	8140/3: Adenocarcinoma, NOS	C20.9-Rectum, NOS	Moderately differentiated; Grade II	Blank(s)	I	Blank(s)	Blank(s)	T2	Blank(s)	Blank(s)	N0	30	4 or more regional lymph nodes removed	Blank(s)	Blank(s)	18	200	3	0	3	7	0	10	No radiation and/or cancer-directed surgery	None	Alive or dead of other cause	Dead (attributable to causes other than this cancer dx)	77	Diseases of Heart	One primary only	March	No/Unknown
4531412	2005	Female	77	Asian or Pacific Islander	Widowed	Rectum	8140/3: Adenocarcinoma, NOS	C20.9-Rectum, NOS	Moderately differentiated; Grade II	Blank(s)	IIIC	Blank(s)	Blank(s)	T4	Blank(s)	Blank(s)	N2	30	4 or more regional lymph nodes removed	Blank(s)	Blank(s)	45	500	3	300	3	25	6	20	No radiation and/or cancer-directed surgery	None	Alive or dead of other cause	Dead (attributable to causes other than this cancer dx)	96	Cerebrovascular Diseases	One primary only	September	Yes
4531465	2005	Male	76	Asian or Pacific Islander	Married (including common law)	Sigmoid Colon	8140/3: Adenocarcinoma, NOS	C18.7-Sigmoid colon	Moderately differentiated; Grade II	Blank(s)	IIA	Blank(s)	Blank(s)	T3	Blank(s)	Blank(s)	N0	30	4 or more regional lymph nodes removed	Blank(s)	Blank(s)	30	458	3	0	3	5	0	999	No radiation and/or cancer-directed surgery	None	Alive or dead of other cause	Alive or dead due to cancer	100	Alive	One primary only	August	No/Unknown
4531528	2005	Female	50	White	Married (including common law)	Rectosigmoid Junction	8140/3: Adenocarcinoma, NOS	C19.9-Rectosigmoid junction	Moderately differentiated; Grade II	Blank(s)	IIIA	Blank(s)	Blank(s)	T2	Blank(s)	Blank(s)	N1	30	4 or more regional lymph nodes removed	Blank(s)	Blank(s)	999	200	3	100	3	16	2	999	Radiation prior to surgery	Beam radiation	Alive or dead of other cause	Alive or dead due to cancer	103	Alive	One primary only	May	Yes
4531679	2005	Male	77	White	Single (never married)	Hepatic Flexure	8140/3: Adenocarcinoma, NOS	C18.3-Hepatic flexure of colon	Moderately differentiated; Grade II	Blank(s)	IIA	Blank(s)	Blank(s)	T3	Blank(s)	Blank(s)	N0	40	4 or more regional lymph nodes removed	Blank(s)	Blank(s)	30	450	3	0	3	10	0	20	No radiation and/or cancer-directed surgery	None	Alive or dead of other cause	Alive or dead due to cancer	103	Alive	One primary only	May	No/Unknown
4531688	2005	Female	49	Asian or Pacific Islander	Married (including common law)	Rectum	8140/3: Adenocarcinoma, NOS	C20.9-Rectum, NOS	Moderately differentiated; Grade II	Blank(s)	IIIC	Blank(s)	Blank(s)	T2	Blank(s)	Blank(s)	N2	30	4 or more regional lymph nodes removed	Blank(s)	Blank(s)	20	200	3	100	3	10	4	10	Radiation after surgery	Beam radiation	Alive or dead of other cause	Alive or dead due to cancer	103	Alive	One primary only	May	Yes
4531716	2005	Male	61	White	Married (including common law)	Rectum	8140/3: Adenocarcinoma, NOS	C20.9-Rectum, NOS	Moderately differentiated; Grade II	Blank(s)	IIIC	Blank(s)	Blank(s)	T3	Blank(s)	Blank(s)	N2	50	4 or more regional lymph nodes removed	Blank(s)	Blank(s)	75	450	6	200	6	14	6	10	Radiation prior to surgery	Beam radiation	Alive or dead of other cause	Alive or dead due to cancer	99	Alive	One primary only	September	Yes
4531719	2005	Male	68	White	Divorced	Rectum	8140/3: Adenocarcinoma, NOS	C20.9-Rectum, NOS	Well differentiated; Grade I	Blank(s)	IIA	Blank(s)	Blank(s)	T3	Blank(s)	Blank(s)	N0	20	None	Blank(s)	Blank(s)	999	400	3	0	0	12	0	10	Radiation before and after surgery	Beam radiation	Alive or dead of other cause	Alive or dead due to cancer	102	Alive	One primary only	July	Yes
4531945	2005	Female	64	White	Separated	Sigmoid Colon	8140/3: Adenocarcinoma, NOS	C18.7-Sigmoid colon	Poorly differentiated; Grade III	Blank(s)	IIA	Blank(s)	Blank(s)	T3	Blank(s)	Blank(s)	N0	30	4 or more regional lymph nodes removed	Blank(s)	Blank(s)	40	400	3	0	3	15	0	999	No radiation and/or cancer-directed surgery	None	Alive or dead of other cause	Alive or dead due to cancer	96	Alive	One primary only	December	Yes
4532332	2005	Male	76	White	Married (including common law)	Hepatic Flexure	8140/3: Adenocarcinoma, NOS	C18.3-Hepatic flexure of colon	Moderately differentiated; Grade II	Blank(s)	IIA	Blank(s)	Blank(s)	T3	Blank(s)	Blank(s)	N0	40	4 or more regional lymph nodes removed	Blank(s)	Blank(s)	40	450	3	0	3	24	0	998	No radiation and/or cancer-directed surgery	None	Alive or dead of other cause	Alive or dead due to cancer	100	Alive	One primary only	August	No/Unknown
4532450	2005	Female	55	White	Married (including common law)	Sigmoid Colon	8140/3: Adenocarcinoma, NOS	C18.7-Sigmoid colon	Moderately differentiated; Grade II	Blank(s)	IIIB	Blank(s)	Blank(s)	T3	Blank(s)	Blank(s)	N1	30	4 or more regional lymph nodes removed	Blank(s)	Blank(s)	43	400	3	300	3	17	1	998	No radiation and/or cancer-directed surgery	None	Alive or dead of other cause	Alive or dead due to cancer	99	Alive	One primary only	September	No/Unknown
4532509	2005	Female	62	White	Married (including common law)	Cecum	8480/3: Mucinous adenocarcinoma	C18.0-Cecum	Poorly differentiated; Grade III	Blank(s)	IIIB	Blank(s)	Blank(s)	T3	Blank(s)	Blank(s)	N1	40	4 or more regional lymph nodes removed	Blank(s)	Blank(s)	95	460	3	300	3	16	2	10	No radiation and/or cancer-directed surgery	None	Alive or dead of other cause	Alive or dead due to cancer	99	Alive	One primary only	September	Yes
4532510	2005	Female	62	White	Married (including common law)	Ascending Colon	8140/3: Adenocarcinoma, NOS	C18.2-Ascending colon	Well differentiated; Grade I	Blank(s)	I	Blank(s)	Blank(s)	T1	Blank(s)	Blank(s)	N0	30	1 to 3 regional lymph nodes removed	Blank(s)	Blank(s)	3	160	3	0	3	1	0	998	No radiation and/or cancer-directed surgery	None	Alive or dead of other cause	Alive or dead due to cancer	96	Alive	One primary only	December	No/Unknown
4532558	2005	Female	56	Black	Married (including common law)	Transverse Colon	8140/3: Adenocarcinoma, NOS	C18.4-Transverse colon	Moderately differentiated; Grade II	Blank(s)	IIA	Blank(s)	Blank(s)	T3	Blank(s)	Blank(s)	N0	30	4 or more regional lymph nodes removed	Blank(s)	Blank(s)	50	400	3	0	3	37	0	10	No radiation and/or cancer-directed surgery	None	Dead (attributable to this cancer dx)	Alive or dead due to cancer	51	Colon excluding Rectum	One primary only	September	No/Unknown
4532904	2005	Female	73	White	Married (including common law)	Splenic Flexure	8140/3: Adenocarcinoma, NOS	C18.5-Splenic flexure of colon	Moderately differentiated; Grade II	Blank(s)	IIA	Blank(s)	Blank(s)	T3	Blank(s)	Blank(s)	N0	40	4 or more regional lymph nodes removed	Blank(s)	Blank(s)	20	400	3	0	3	20	0	20	No radiation and/or cancer-directed surgery	None	Alive or dead of other cause	Alive or dead due to cancer	96	Alive	One primary only	December	No/Unknown
4533023	2005	Female	77	Black	Widowed	Transverse Colon	8140/3: Adenocarcinoma, NOS	C18.4-Transverse colon	Moderately differentiated; Grade II	Blank(s)	I	Blank(s)	Blank(s)	T2	Blank(s)	Blank(s)	N0	40	4 or more regional lymph nodes removed	Blank(s)	Blank(s)	10	200	3	0	3	6	0	20	No radiation and/or cancer-directed surgery	None	Alive or dead of other cause	Dead (attributable to causes other than this cancer dx)	87	Cerebrovascular Diseases	One primary only	October	No/Unknown
4533059	2005	Female	80	White	Married (including common law)	Sigmoid Colon	8140/3: Adenocarcinoma, NOS	C18.7-Sigmoid colon	Moderately differentiated; Grade II	Blank(s)	I	Blank(s)	Blank(s)	T1	Blank(s)	Blank(s)	N0	30	4 or more regional lymph nodes removed	Blank(s)	Blank(s)	12	300	3	0	3	10	0	998	No radiation and/or cancer-directed surgery	None	Alive or dead of other cause	Dead (attributable to causes other than this cancer dx)	68	Diseases of Heart	One primary only	August	No/Unknown
4534407	2005	Female	77	White	Single (never married)	Cecum	8140/3: Adenocarcinoma, NOS	C18.0-Cecum	Moderately differentiated; Grade II	Blank(s)	IIIB	Blank(s)	Blank(s)	T3	Blank(s)	Blank(s)	N1	40	4 or more regional lymph nodes removed	Blank(s)	Blank(s)	52	400	3	100	3	25	1	10	No radiation and/or cancer-directed surgery	None	Dead (attributable to this cancer dx)	Alive or dead due to cancer	79	Colon excluding Rectum	One primary only	June	Yes
4534687	2005	Female	51	Asian or Pacific Islander	Single (never married)	Sigmoid Colon	8140/3: Adenocarcinoma, NOS	C18.7-Sigmoid colon	Moderately differentiated; Grade II	Blank(s)	I	Blank(s)	Blank(s)	T2	Blank(s)	Blank(s)	N0	30	4 or more regional lymph nodes removed	Blank(s)	Blank(s)	40	200	3	0	3	10	0	20	No radiation and/or cancer-directed surgery	None	Alive or dead of other cause	Alive or dead due to cancer	98	Alive	One primary only	October	No/Unknown
4534874	2005	Female	60	White	Single (never married)	Descending Colon	8480/3: Mucinous adenocarcinoma	C18.6-Descending colon	Well differentiated; Grade I	Blank(s)	IIA	Blank(s)	Blank(s)	T3	Blank(s)	Blank(s)	N0	30	4 or more regional lymph nodes removed	Blank(s)	Blank(s)	70	400	3	0	3	16	0	998	No radiation and/or cancer-directed surgery	None	Alive or dead of other cause	Alive or dead due to cancer	101	Alive	One primary only	July	No/Unknown
4534881	2005	Male	62	White	Married (including common law)	Rectum	8140/3: Adenocarcinoma, NOS	C20.9-Rectum, NOS	Moderately differentiated; Grade II	Blank(s)	IIIA	Blank(s)	Blank(s)	T2	Blank(s)	Blank(s)	N1	30	1 to 3 regional lymph nodes removed	Blank(s)	Blank(s)	16	200	3	100	3	3	3	20	Radiation after surgery	Beam radiation	Dead (attributable to this cancer dx)	Alive or dead due to cancer	20	Colon excluding Rectum	One primary only	August	No/Unknown
4535007	2005	Female	71	White	Widowed	Descending Colon	8140/3: Adenocarcinoma, NOS	C18.6-Descending colon	Moderately differentiated; Grade II	Blank(s)	IIA	Blank(s)	Blank(s)	T3	Blank(s)	Blank(s)	N0	80	Number of regional lymph nodes removed unknown	Blank(s)	Blank(s)	140	450	3	0	3	1	0	998	No radiation and/or cancer-directed surgery	None	Alive or dead of other cause	Alive or dead due to cancer	99	Alive	One primary only	September	No/Unknown
4535044	2005	Female	49	White	Married (including common law)	Sigmoid Colon	8140/3: Adenocarcinoma, NOS	C18.7-Sigmoid colon	Moderately differentiated; Grade II	Blank(s)	IIIB	Blank(s)	Blank(s)	T3	Blank(s)	Blank(s)	N1	30	4 or more regional lymph nodes removed	Blank(s)	Blank(s)	35	450	3	300	3	6	1	10	Radiation after surgery	Beam radiation	Alive or dead of other cause	Alive or dead due to cancer	99	Alive	One primary only	September	Yes
4535072	2005	Female	56	White	Widowed	Rectosigmoid Junction	8140/3: Adenocarcinoma, NOS	C19.9-Rectosigmoid junction	Moderately differentiated; Grade II	Blank(s)	IIA	Blank(s)	Blank(s)	T3	Blank(s)	Blank(s)	N0	30	4 or more regional lymph nodes removed	Blank(s)	Blank(s)	999	450	3	0	3	8	0	10	No radiation and/or cancer-directed surgery	None	Alive or dead of other cause	Dead (attributable to causes other than this cancer dx)	89	State DC not available or state DC available but no COD	One primary only	August	Yes
4535082	2005	Male	44	White	Married (including common law)	Hepatic Flexure	8140/3: Adenocarcinoma, NOS	C18.3-Hepatic flexure of colon	Poorly differentiated; Grade III	Blank(s)	I	Blank(s)	Blank(s)	T2	Blank(s)	Blank(s)	N0	40	1 to 3 regional lymph nodes removed	Blank(s)	Blank(s)	999	200	3	0	3	3	0	20	No radiation and/or cancer-directed surgery	None	Alive or dead of other cause	Alive or dead due to cancer	99	Alive	One primary only	September	No/Unknown
4535088	2005	Female	62	White	Divorced	Sigmoid Colon	8140/3: Adenocarcinoma, NOS	C18.7-Sigmoid colon	Moderately differentiated; Grade II	Blank(s)	IIIB	Blank(s)	Blank(s)	T3	Blank(s)	Blank(s)	N1	30	4 or more regional lymph nodes removed	Blank(s)	Blank(s)	30	450	3	300	3	11	1	20	No radiation and/or cancer-directed surgery	None	Alive or dead of other cause	Alive or dead due to cancer	99	Alive	One primary only	September	Yes
4535123	2005	Female	68	White	Single (never married)	Hepatic Flexure	8140/3: Adenocarcinoma, NOS	C18.3-Hepatic flexure of colon	Moderately differentiated; Grade II	Blank(s)	IIA	Blank(s)	Blank(s)	T3	Blank(s)	Blank(s)	N0	30	4 or more regional lymph nodes removed	Blank(s)	Blank(s)	15	450	3	0	3	29	0	20	No radiation and/or cancer-directed surgery	None	Alive or dead of other cause	Alive or dead due to cancer	99	Alive	One primary only	September	Yes
4535362	2005	Female	59	White	Single (never married)	Transverse Colon	8140/3: Adenocarcinoma, NOS	C18.4-Transverse colon	Moderately differentiated; Grade II	Blank(s)	IIIA	Blank(s)	Blank(s)	T1	Blank(s)	Blank(s)	N1	40	4 or more regional lymph nodes removed	Blank(s)	Blank(s)	999	300	3	300	3	8	1	20	No radiation and/or cancer-directed surgery	None	Alive or dead of other cause	Alive or dead due to cancer	99	Alive	One primary only	September	No/Unknown
4535412	2005	Female	59	American Indian/Alaska Native	Married (including common law)	Rectum	8140/3: Adenocarcinoma, NOS	C20.9-Rectum, NOS	Moderately differentiated; Grade II	Blank(s)	I	Blank(s)	Blank(s)	T1	Blank(s)	Blank(s)	N0	27	None	Blank(s)	Blank(s)	64	300	5	0	0	0	98	10	Radiation prior to surgery	Beam radiation	Alive or dead of other cause	Alive or dead due to cancer	100	Alive	One primary only	August	Yes
4535490	2005	Male	63	White	Married (including common law)	Rectum	8140/3: Adenocarcinoma, NOS	C20.9-Rectum, NOS	Moderately differentiated; Grade II	Blank(s)	IIB	Blank(s)	Blank(s)	T4	Blank(s)	Blank(s)	N0	0	None	Blank(s)	Blank(s)	9	570	1	0	0	0	98	998	No radiation and/or cancer-directed surgery	Beam radiation	Dead (attributable to this cancer dx)	Alive or dead due to cancer	34	Rectum and Rectosigmoid Junction	One primary only	October	Yes
4535505	2005	Female	45	White	Married (including common law)	Cecum	8140/3: Adenocarcinoma, NOS	C18.0-Cecum	Moderately differentiated; Grade II	Blank(s)	IIA	Blank(s)	Blank(s)	T3	Blank(s)	Blank(s)	N0	40	4 or more regional lymph nodes removed	Blank(s)	Blank(s)	60	400	3	0	0	14	0	20	No radiation and/or cancer-directed surgery	None	Alive or dead of other cause	Alive or dead due to cancer	98	Alive	One primary only	October	Yes
4535541	2005	Female	55	White	Married (including common law)	Ascending Colon	8140/3: Adenocarcinoma, NOS	C18.2-Ascending colon	Moderately differentiated; Grade II	Blank(s)	IIB	Blank(s)	Blank(s)	T4	Blank(s)	Blank(s)	N0	30	4 or more regional lymph nodes removed	Blank(s)	Blank(s)	80	500	3	0	3	26	0	20	No radiation and/or cancer-directed surgery	None	Alive or dead of other cause	Alive or dead due to cancer	101	Alive	One primary only	July	Yes
4535544	2004	Female	56	Asian or Pacific Islander	Married (including common law)	Rectum	8140/3: Adenocarcinoma, NOS	C20.9-Rectum, NOS	Moderately differentiated; Grade II	Blank(s)	IIA	Blank(s)	Blank(s)	T3	Blank(s)	Blank(s)	N0	30	4 or more regional lymph nodes removed	Blank(s)	Blank(s)	995	400	5	0	3	8	0	999	Radiation prior to surgery	Beam radiation	Alive or dead of other cause	Alive or dead due to cancer	109	Alive	One primary only	November	Yes
4535547	2005	Male	65	White	Married (including common law)	Hepatic Flexure	8140/3: Adenocarcinoma, NOS	C18.3-Hepatic flexure of colon	Moderately differentiated; Grade II	Blank(s)	IIA	Blank(s)	Blank(s)	T3	Blank(s)	Blank(s)	N0	30	4 or more regional lymph nodes removed	Blank(s)	Blank(s)	80	450	3	0	3	45	0	20	No radiation and/or cancer-directed surgery	None	Alive or dead of other cause	Alive or dead due to cancer	96	Alive	One primary only	December	Yes
4535550	2005	Male	79	Asian or Pacific Islander	Married (including common law)	Rectosigmoid Junction	8140/3: Adenocarcinoma, NOS	C19.9-Rectosigmoid junction	Poorly differentiated; Grade III	Blank(s)	I	Blank(s)	Blank(s)	T2	Blank(s)	Blank(s)	N0	30	4 or more regional lymph nodes removed	Blank(s)	Blank(s)	23	200	3	0	3	8	0	20	No radiation and/or cancer-directed surgery	None	Alive or dead of other cause	Alive or dead due to cancer	96	Alive	One primary only	December	No/Unknown
4535583	2005	Male	78	White	Married (including common law)	Cecum	8140/3: Adenocarcinoma, NOS	C18.0-Cecum	Moderately differentiated; Grade II	Blank(s)	IIB	Blank(s)	Blank(s)	T4	Blank(s)	Blank(s)	N0	30	4 or more regional lymph nodes removed	Blank(s)	Blank(s)	35	550	3	0	3	8	0	20	No radiation and/or cancer-directed surgery	None	Alive or dead of other cause	Alive or dead due to cancer	101	Alive	One primary only	July	No/Unknown
4535610	2005	Female	66	White	Single (never married)	Cecum	8140/3: Adenocarcinoma, NOS	C18.0-Cecum	Moderately differentiated; Grade II	Blank(s)	IIA	Blank(s)	Blank(s)	T3	Blank(s)	Blank(s)	N0	30	4 or more regional lymph nodes removed	Blank(s)	Blank(s)	999	400	3	0	3	16	0	998	No radiation and/or cancer-directed surgery	None	Alive or dead of other cause	Dead (attributable to causes other than this cancer dx)	38	Cerebrovascular Diseases	One primary only	November	No/Unknown
4536045	2005	Female	43	Asian or Pacific Islander	Married (including common law)	Ascending Colon	8480/3: Mucinous adenocarcinoma	C18.2-Ascending colon	Moderately differentiated; Grade II	Blank(s)	I	Blank(s)	Blank(s)	T2	Blank(s)	Blank(s)	N0	40	4 or more regional lymph nodes removed	Blank(s)	Blank(s)	35	200	3	0	3	15	0	20	No radiation and/or cancer-directed surgery	None	Alive or dead of other cause	Alive or dead due to cancer	99	Alive	One primary only	September	No/Unknown
4536071	2005	Male	50	Asian or Pacific Islander	Married (including common law)	Sigmoid Colon	8140/3: Adenocarcinoma, NOS	C18.7-Sigmoid colon	Moderately differentiated; Grade II	Blank(s)	IIIC	Blank(s)	Blank(s)	T3	Blank(s)	Blank(s)	N2	30	4 or more regional lymph nodes removed	Blank(s)	Blank(s)	30	400	3	300	3	9	4	20	No radiation and/or cancer-directed surgery	None	Alive or dead of other cause	Alive or dead due to cancer	99	Alive	One primary only	September	Yes
4536294	2005	Female	38	White	Married (including common law)	Rectum	8140/3: Adenocarcinoma, NOS	C20.9-Rectum, NOS	Moderately differentiated; Grade II	Blank(s)	I	Blank(s)	Blank(s)	T2	Blank(s)	Blank(s)	N0	70	4 or more regional lymph nodes removed	Blank(s)	Blank(s)	35	200	6	0	6	19	0	10	Radiation after surgery	Beam radiation	Alive or dead of other cause	Dead (attributable to causes other than this cancer dx)	26	Accidents and Adverse Effects	One primary only	October	Yes
4536328	2005	Male	71	White	Divorced	Rectum	8140/3: Adenocarcinoma, NOS	C20.9-Rectum, NOS	Moderately differentiated; Grade II	Blank(s)	IIA	Blank(s)	Blank(s)	T3	Blank(s)	Blank(s)	N0	0	None	Blank(s)	Blank(s)	50	400	1	0	0	0	98	998	No radiation and/or cancer-directed surgery	Beam radiation	Dead (attributable to this cancer dx)	Alive or dead due to cancer	34	Rectum and Rectosigmoid Junction	One primary only	August	Yes
4536379	2005	Male	76	Asian or Pacific Islander	Married (including common law)	Sigmoid Colon	8140/3: Adenocarcinoma, NOS	C18.7-Sigmoid colon	Moderately differentiated; Grade II	Blank(s)	IIIB	Blank(s)	Blank(s)	T3	Blank(s)	Blank(s)	N1	30	4 or more regional lymph nodes removed	Blank(s)	Blank(s)	40	450	3	100	3	5	1	10	No radiation and/or cancer-directed surgery	None	Dead (attributable to this cancer dx)	Alive or dead due to cancer	24	Colon excluding Rectum	One primary only	September	No/Unknown
4536385	2005	Female	56	Asian or Pacific Islander	Married (including common law)	Rectosigmoid Junction	8140/3: Adenocarcinoma, NOS	C19.9-Rectosigmoid junction	Moderately differentiated; Grade II	Blank(s)	IIA	Blank(s)	Blank(s)	T3	Blank(s)	Blank(s)	N0	30	4 or more regional lymph nodes removed	Blank(s)	Blank(s)	30	450	3	0	3	15	0	20	No radiation and/or cancer-directed surgery	None	Alive or dead of other cause	Alive or dead due to cancer	100	Alive	One primary only	August	No/Unknown
4536386	2005	Male	72	Asian or Pacific Islander	Married (including common law)	Rectum	8140/3: Adenocarcinoma, NOS	C20.9-Rectum, NOS	Moderately differentiated; Grade II	Blank(s)	IIA	Blank(s)	Blank(s)	T3	Blank(s)	Blank(s)	N0	30	4 or more regional lymph nodes removed	Blank(s)	Blank(s)	70	450	3	0	3	16	0	20	No radiation and/or cancer-directed surgery	None	Alive or dead of other cause	Alive or dead due to cancer	98	Alive	One primary only	October	No/Unknown
4536389	2005	Male	71	Asian or Pacific Islander	Married (including common law)	Ascending Colon	8140/3: Adenocarcinoma, NOS	C18.2-Ascending colon	Moderately differentiated; Grade II	Blank(s)	IIIB	Blank(s)	Blank(s)	T3	Blank(s)	Blank(s)	N1	40	4 or more regional lymph nodes removed	Blank(s)	Blank(s)	26	450	3	300	3	17	2	10	No radiation and/or cancer-directed surgery	None	Alive or dead of other cause	Alive or dead due to cancer	98	Alive	One primary only	October	No/Unknown
4536492	2005	Male	49	Black	Single (never married)	Rectum	8140/3: Adenocarcinoma, NOS	C20.9-Rectum, NOS	Moderately differentiated; Grade II	Blank(s)	IIA	Blank(s)	Blank(s)	T3	Blank(s)	Blank(s)	N0	30	1 to 3 regional lymph nodes removed	Blank(s)	Blank(s)	40	400	5	0	5	98	0	999	Radiation prior to surgery	Beam radiation	Alive or dead of other cause	Alive or dead due to cancer	103	Alive	One primary only	June	Yes
4536500	2005	Male	68	White	Married (including common law)	Rectum	8480/3: Mucinous adenocarcinoma	C20.9-Rectum, NOS	Moderately differentiated; Grade II	Blank(s)	IIIB	Blank(s)	Blank(s)	T3	Blank(s)	Blank(s)	N1	30	4 or more regional lymph nodes removed	Blank(s)	Blank(s)	25	450	6	100	6	7	1	999	Radiation before and after surgery	Beam radiation	Alive or dead of other cause	Dead (attributable to causes other than this cancer dx)	66	Other Cause of Death	One primary only	November	No/Unknown
4536518	2005	Male	71	White	Single (never married)	Rectosigmoid Junction	8140/3: Adenocarcinoma, NOS	C19.9-Rectosigmoid junction	Moderately differentiated; Grade II	Blank(s)	I	Blank(s)	Blank(s)	T1	Blank(s)	Blank(s)	N0	26	None	Blank(s)	Blank(s)	60	150	3	0	0	0	98	10	Radiation after surgery	Beam radiation	Alive or dead of other cause	Alive or dead due to cancer	96	Alive	One primary only	December	Yes
4536532	2005	Male	61	White	Married (including common law)	Rectum	8140/3: Adenocarcinoma, NOS	C20.9-Rectum, NOS	Moderately differentiated; Grade II	Blank(s)	IIIB	Blank(s)	Blank(s)	T3	Blank(s)	Blank(s)	N1	30	4 or more regional lymph nodes removed	Blank(s)	Blank(s)	999	450	6	300	6	12	0	20	Radiation prior to surgery	Beam radiation	Alive or dead of other cause	Alive or dead due to cancer	98	Alive	One primary only	October	Yes
4536757	2005	Male	75	Black	Married (including common law)	Rectum	8140/3: Adenocarcinoma, NOS	C20.9-Rectum, NOS	Moderately differentiated; Grade II	Blank(s)	IIIB	Blank(s)	Blank(s)	T3	Blank(s)	Blank(s)	N1	30	4 or more regional lymph nodes removed	Blank(s)	Blank(s)	40	450	5	100	5	5	1	999	Radiation before and after surgery	Beam radiation	Alive or dead of other cause	Dead (attributable to causes other than this cancer dx)	8	Diseases of Heart	One primary only	October	Yes
4536895	2005	Male	75	White	Divorced	Cecum	8140/3: Adenocarcinoma, NOS	C18.0-Cecum	Moderately differentiated; Grade II	Blank(s)	IIB	Blank(s)	Blank(s)	T4	Blank(s)	Blank(s)	N0	40	4 or more regional lymph nodes removed	Blank(s)	Blank(s)	100	600	3	0	3	16	0	20	No radiation and/or cancer-directed surgery	None	Alive or dead of other cause	Alive or dead due to cancer	101	Alive	One primary only	July	No/Unknown
4536903	2005	Female	70	White	Unknown	Ascending Colon	8140/3: Adenocarcinoma, NOS	C18.2-Ascending colon	Moderately differentiated; Grade II	Blank(s)	IIA	Blank(s)	Blank(s)	T3	Blank(s)	Blank(s)	N0	40	4 or more regional lymph nodes removed	Blank(s)	Blank(s)	71	450	3	0	3	16	0	20	No radiation and/or cancer-directed surgery	None	Alive or dead of other cause	Alive or dead due to cancer	96	Alive	One primary only	December	No/Unknown
4536923	2005	Male	68	Asian or Pacific Islander	Unknown	Sigmoid Colon	8140/3: Adenocarcinoma, NOS	C18.7-Sigmoid colon	Moderately differentiated; Grade II	Blank(s)	IIA	Blank(s)	Blank(s)	T3	Blank(s)	Blank(s)	N0	30	4 or more regional lymph nodes removed	Blank(s)	Blank(s)	78	450	3	0	3	28	0	998	No radiation and/or cancer-directed surgery	None	Alive or dead of other cause	Alive or dead due to cancer	97	Alive	One primary only	November	No/Unknown
4536924	2005	Female	73	White	Widowed	Sigmoid Colon	8480/3: Mucinous adenocarcinoma	C18.7-Sigmoid colon	Moderately differentiated; Grade II	Blank(s)	IIIC	Blank(s)	Blank(s)	T3	Blank(s)	Blank(s)	N2	30	4 or more regional lymph nodes removed	Blank(s)	Blank(s)	34	450	3	100	3	16	8	998	No radiation and/or cancer-directed surgery	None	Alive or dead of other cause	Dead (attributable to causes other than this cancer dx)	33	Diseases of Heart	One primary only	November	No/Unknown
4537002	2005	Female	56	White	Divorced	Rectum	8140/3: Adenocarcinoma, NOS	C20.9-Rectum, NOS	Moderately differentiated; Grade II	Blank(s)	IIA	Blank(s)	Blank(s)	T3	Blank(s)	Blank(s)	N0	30	4 or more regional lymph nodes removed	Blank(s)	Blank(s)	999	458	3	0	3	12	0	20	Radiation after surgery	Beam radiation	Alive or dead of other cause	Alive or dead due to cancer	98	Alive	One primary only	October	Yes
4537178	2005	Male	78	Black	Single (never married)	Rectum	8140/3: Adenocarcinoma, NOS	C20.9-Rectum, NOS	Moderately differentiated; Grade II	Blank(s)	I	Blank(s)	Blank(s)	T2	Blank(s)	Blank(s)	N0	30	4 or more regional lymph nodes removed	Blank(s)	Blank(s)	52	200	3	0	3	8	0	998	No radiation and/or cancer-directed surgery	None	Alive or dead of other cause	Dead (attributable to causes other than this cancer dx)	3	Chronic Obstructive Pulmonary Disease and Allied Cond	One primary only	July	No/Unknown
4537186	2005	Female	66	Black	Widowed	Splenic Flexure	8140/3: Adenocarcinoma, NOS	C18.5-Splenic flexure of colon	Moderately differentiated; Grade II	Blank(s)	IIIB	Blank(s)	Blank(s)	T3	Blank(s)	Blank(s)	N1	30	4 or more regional lymph nodes removed	Blank(s)	Blank(s)	20	450	3	100	3	8	3	20	No radiation and/or cancer-directed surgery	None	Alive or dead of other cause	Alive or dead due to cancer	99	Alive	One primary only	September	No/Unknown
4537194	2005	Female	47	White	Divorced	Descending Colon	8480/3: Mucinous adenocarcinoma	C18.6-Descending colon	Moderately differentiated; Grade II	Blank(s)	IIB	Blank(s)	Blank(s)	T4	Blank(s)	Blank(s)	N0	70	4 or more regional lymph nodes removed	Blank(s)	Blank(s)	70	500	3	0	3	17	0	998	No radiation and/or cancer-directed surgery	None	Dead (attributable to this cancer dx)	Alive or dead due to cancer	68	Colon excluding Rectum	One primary only	August	Yes
4537321	2005	Female	53	White	Married (including common law)	Cecum	8140/3: Adenocarcinoma, NOS	C18.0-Cecum	Moderately differentiated; Grade II	Blank(s)	IIA	Blank(s)	Blank(s)	T3	Blank(s)	Blank(s)	N0	30	4 or more regional lymph nodes removed	Blank(s)	Blank(s)	66	400	3	0	3	22	0	20	No radiation and/or cancer-directed surgery	None	Alive or dead of other cause	Alive or dead due to cancer	102	Alive	One primary only	June	Yes
4537408	2005	Female	63	Black	Single (never married)	Cecum	8140/3: Adenocarcinoma, NOS	C18.0-Cecum	Moderately differentiated; Grade II	Blank(s)	IIA	Blank(s)	Blank(s)	T3	Blank(s)	Blank(s)	N0	40	4 or more regional lymph nodes removed	Blank(s)	Blank(s)	80	450	3	0	3	20	0	998	No radiation and/or cancer-directed surgery	None	Alive or dead of other cause	Alive or dead due to cancer	97	Alive	One primary only	November	No/Unknown
4537523	2005	Female	52	White	Single (never married)	Sigmoid Colon	8140/3: Adenocarcinoma, NOS	C18.7-Sigmoid colon	Moderately differentiated; Grade II	Blank(s)	IIIB	Blank(s)	Blank(s)	T3	Blank(s)	Blank(s)	N1	30	4 or more regional lymph nodes removed	Blank(s)	Blank(s)	40	450	3	200	3	11	1	999	No radiation and/or cancer-directed surgery	None	Dead (attributable to this cancer dx)	Alive or dead due to cancer	39	Colon excluding Rectum	One primary only	June	Yes
4537528	2005	Male	78	Asian or Pacific Islander	Widowed	Rectum	8140/3: Adenocarcinoma, NOS	C20.9-Rectum, NOS	Moderately differentiated; Grade II	Blank(s)	IIIC	Blank(s)	Blank(s)	T3	Blank(s)	Blank(s)	N2	30	4 or more regional lymph nodes removed	Blank(s)	Blank(s)	35	450	3	100	3	4	4	10	No radiation and/or cancer-directed surgery	None	Dead (attributable to this cancer dx)	Alive or dead due to cancer	15	Rectum and Rectosigmoid Junction	One primary only	June	No/Unknown
4537551	2005	Male	76	White	Married (including common law)	Cecum	8480/3: Mucinous adenocarcinoma	C18.0-Cecum	Poorly differentiated; Grade III	Blank(s)	IIIC	Blank(s)	Blank(s)	T4	Blank(s)	Blank(s)	N2	40	4 or more regional lymph nodes removed	Blank(s)	Blank(s)	65	550	3	100	3	8	7	999	No radiation and/or cancer-directed surgery	None	Dead (attributable to this cancer dx)	Alive or dead due to cancer	7	Colon excluding Rectum	One primary only	December	Yes
4537655	2005	Male	64	Asian or Pacific Islander	Married (including common law)	Sigmoid Colon	8140/3: Adenocarcinoma, NOS	C18.7-Sigmoid colon	Moderately differentiated; Grade II	Blank(s)	IIIB	Blank(s)	Blank(s)	T4	Blank(s)	Blank(s)	N1	32	4 or more regional lymph nodes removed	Blank(s)	Blank(s)	75	570	3	100	3	27	3	10	No radiation and/or cancer-directed surgery	None	Dead (attributable to this cancer dx)	Alive or dead due to cancer	37	Colon excluding Rectum	One primary only	July	Yes
4538122	2005	Male	76	White	Married (including common law)	Sigmoid Colon	8140/3: Adenocarcinoma, NOS	C18.7-Sigmoid colon	Poorly differentiated; Grade III	Blank(s)	IIA	Blank(s)	Blank(s)	T3	Blank(s)	Blank(s)	N0	30	4 or more regional lymph nodes removed	Blank(s)	Blank(s)	30	450	3	0	3	11	0	10	No radiation and/or cancer-directed surgery	None	Dead (attributable to this cancer dx)	Alive or dead due to cancer	40	Colon excluding Rectum	One primary only	September	Yes
4538145	2005	Male	59	White	Married (including common law)	Ascending Colon	8481/3: Mucin-producing adenocarcinoma	C18.2-Ascending colon	Moderately differentiated; Grade II	Blank(s)	I	Blank(s)	Blank(s)	T2	Blank(s)	Blank(s)	N0	40	4 or more regional lymph nodes removed	Blank(s)	Blank(s)	33	200	3	0	3	6	0	20	No radiation and/or cancer-directed surgery	None	Alive or dead of other cause	Alive or dead due to cancer	99	Alive	One primary only	September	No/Unknown
4538156	2005	Female	59	White	Single (never married)	Ascending Colon	8140/3: Adenocarcinoma, NOS	C18.2-Ascending colon	Poorly differentiated; Grade III	Blank(s)	IIA	Blank(s)	Blank(s)	T3	Blank(s)	Blank(s)	N0	40	4 or more regional lymph nodes removed	Blank(s)	Blank(s)	40	400	3	0	3	27	0	20	No radiation and/or cancer-directed surgery	None	Alive or dead of other cause	Alive or dead due to cancer	98	Alive	One primary only	October	Yes
4538172	2005	Male	51	Asian or Pacific Islander	Married (including common law)	Rectosigmoid Junction	8140/3: Adenocarcinoma, NOS	C19.9-Rectosigmoid junction	Moderately differentiated; Grade II	Blank(s)	IIIB	Blank(s)	Blank(s)	T3	Blank(s)	Blank(s)	N1	30	4 or more regional lymph nodes removed	Blank(s)	Blank(s)	25	400	3	300	3	7	1	20	No radiation and/or cancer-directed surgery	None	Alive or dead of other cause	Alive or dead due to cancer	98	Alive	One primary only	October	Yes
4538237	2005	Male	52	White	Single (never married)	Rectum	8140/3: Adenocarcinoma, NOS	C20.9-Rectum, NOS	Moderately differentiated; Grade II	Blank(s)	I	Blank(s)	Blank(s)	T1	Blank(s)	Blank(s)	N0	30	4 or more regional lymph nodes removed	Blank(s)	Blank(s)	999	300	5	0	6	13	0	20	Radiation prior to surgery	Beam radiation	Alive or dead of other cause	Alive or dead due to cancer	96	Alive	One primary only	December	Yes
4538241	2005	Male	53	White	Married (including common law)	Rectum	8140/3: Adenocarcinoma, NOS	C20.9-Rectum, NOS	Moderately differentiated; Grade II	Blank(s)	I	Blank(s)	Blank(s)	T1	Blank(s)	Blank(s)	N0	30	4 or more regional lymph nodes removed	Blank(s)	Blank(s)	20	160	3	0	3	13	0	999	No radiation and/or cancer-directed surgery	None	Alive or dead of other cause	Alive or dead due to cancer	98	Alive	One primary only	October	No/Unknown
4538253	2005	Male	45	White	Married (including common law)	Sigmoid Colon	8140/3: Adenocarcinoma, NOS	C18.7-Sigmoid colon	Moderately differentiated; Grade II	Blank(s)	IIIC	Blank(s)	Blank(s)	T4	Blank(s)	Blank(s)	N2	30	4 or more regional lymph nodes removed	Blank(s)	Blank(s)	45	550	3	300	3	25	5	10	No radiation and/or cancer-directed surgery	None	Alive or dead of other cause	Alive or dead due to cancer	99	Alive	One primary only	September	Yes
4538256	2005	Female	64	White	Divorced	Ascending Colon	8140/3: Adenocarcinoma, NOS	C18.2-Ascending colon	Poorly differentiated; Grade III	Blank(s)	IIA	Blank(s)	Blank(s)	T3	Blank(s)	Blank(s)	N0	40	4 or more regional lymph nodes removed	Blank(s)	Blank(s)	65	400	3	0	3	17	0	10	No radiation and/or cancer-directed surgery	None	Alive or dead of other cause	Alive or dead due to cancer	99	Alive	One primary only	September	No/Unknown
4538412	2005	Female	69	White	Single (never married)	Cecum	8140/3: Adenocarcinoma, NOS	C18.0-Cecum	Poorly differentiated; Grade III	Blank(s)	IIIB	Blank(s)	Blank(s)	T3	Blank(s)	Blank(s)	N1	41	4 or more regional lymph nodes removed	Blank(s)	Blank(s)	25	450	3	100	3	12	2	998	No radiation and/or cancer-directed surgery	None	Alive or dead of other cause	Alive or dead due to cancer	98	Alive	One primary only	October	Yes
4538711	2005	Female	61	Asian or Pacific Islander	Widowed	Rectosigmoid Junction	8140/3: Adenocarcinoma, NOS	C19.9-Rectosigmoid junction	Moderately differentiated; Grade II	Blank(s)	IIIB	Blank(s)	Blank(s)	T3	Blank(s)	Blank(s)	N1	30	4 or more regional lymph nodes removed	Blank(s)	Blank(s)	40	450	3	100	3	4	1	20	Radiation after surgery	Beam radiation	Alive or dead of other cause	Alive or dead due to cancer	97	Alive	One primary only	November	Yes
4538721	2005	Male	58	Asian or Pacific Islander	Single (never married)	Descending Colon	8140/3: Adenocarcinoma, NOS	C18.6-Descending colon	Moderately differentiated; Grade II	Blank(s)	I	Blank(s)	Blank(s)	T1	Blank(s)	Blank(s)	N0	40	4 or more regional lymph nodes removed	Blank(s)	Blank(s)	999	160	3	0	3	4	0	20	No radiation and/or cancer-directed surgery	None	Alive or dead of other cause	Alive or dead due to cancer	101	Alive	One primary only	July	No/Unknown
4538874	2005	Male	54	White	Married (including common law)	Hepatic Flexure	8140/3: Adenocarcinoma, NOS	C18.3-Hepatic flexure of colon	Moderately differentiated; Grade II	Blank(s)	IIA	Blank(s)	Blank(s)	T3	Blank(s)	Blank(s)	N0	40	4 or more regional lymph nodes removed	Blank(s)	Blank(s)	70	400	3	0	3	18	0	997	No radiation and/or cancer-directed surgery	None	Alive or dead of other cause	Alive or dead due to cancer	98	Alive	One primary only	October	Yes
4539126	2005	Male	38	Asian or Pacific Islander	Married (including common law)	Sigmoid Colon	8140/3: Adenocarcinoma, NOS	C18.7-Sigmoid colon	Poorly differentiated; Grade III	Blank(s)	IIIB	Blank(s)	Blank(s)	T3	Blank(s)	Blank(s)	N1	30	4 or more regional lymph nodes removed	Blank(s)	Blank(s)	35	400	3	200	3	13	1	999	No radiation and/or cancer-directed surgery	None	Alive or dead of other cause	Alive or dead due to cancer	96	Alive	One primary only	December	Yes
4539227	2005	Female	47	White	Divorced	Sigmoid Colon	8140/3: Adenocarcinoma, NOS	C18.7-Sigmoid colon	Well differentiated; Grade I	Blank(s)	I	Blank(s)	Blank(s)	T1	Blank(s)	Blank(s)	N0	0	None	Blank(s)	Blank(s)	2	300	1	0	0	0	98	20	No radiation and/or cancer-directed surgery	None	Alive or dead of other cause	Dead (attributable to causes other than this cancer dx)	94	Symptoms, Signs and Ill-Defined Conditions	One primary only	September	No/Unknown
4539253	2005	Male	55	White	Single (never married)	Sigmoid Colon	8140/3: Adenocarcinoma, NOS	C18.7-Sigmoid colon	Moderately differentiated; Grade II	Blank(s)	IIA	Blank(s)	Blank(s)	T3	Blank(s)	Blank(s)	N0	30	4 or more regional lymph nodes removed	Blank(s)	Blank(s)	28	400	3	0	3	5	0	20	No radiation and/or cancer-directed surgery	None	Dead (attributable to this cancer dx)	Alive or dead due to cancer	45	Colon excluding Rectum	One primary only	October	No/Unknown
4539271	2005	Male	45	Black	Married (including common law)	Splenic Flexure	8140/3: Adenocarcinoma, NOS	C18.5-Splenic flexure of colon	Moderately differentiated; Grade II	Blank(s)	IIIC	Blank(s)	Blank(s)	T3	Blank(s)	Blank(s)	N2	30	4 or more regional lymph nodes removed	Blank(s)	Blank(s)	48	400	3	100	3	15	4	20	No radiation and/or cancer-directed surgery	None	Dead (attributable to this cancer dx)	Alive or dead due to cancer	27	Colon excluding Rectum	One primary only	July	Yes
4539273	2005	Male	41	Asian or Pacific Islander	Married (including common law)	Cecum	8140/3: Adenocarcinoma, NOS	C18.0-Cecum	Moderately differentiated; Grade II	Blank(s)	IIIB	Blank(s)	Blank(s)	T3	Blank(s)	Blank(s)	N1	40	4 or more regional lymph nodes removed	Blank(s)	Blank(s)	50	400	3	100	3	14	1	20	No radiation and/or cancer-directed surgery	None	Alive or dead of other cause	Alive or dead due to cancer	98	Alive	One primary only	October	Yes
4539687	2005	Male	57	White	Married (including common law)	Cecum	8140/3: Adenocarcinoma, NOS	C18.0-Cecum	Moderately differentiated; Grade II	Blank(s)	IIA	Blank(s)	Blank(s)	T3	Blank(s)	Blank(s)	N0	40	4 or more regional lymph nodes removed	Blank(s)	Blank(s)	48	450	3	0	3	20	0	999	No radiation and/or cancer-directed surgery	None	Alive or dead of other cause	Alive or dead due to cancer	97	Alive	One primary only	November	Yes
4539719	2005	Female	58	Black	Single (never married)	Rectosigmoid Junction	8140/3: Adenocarcinoma, NOS	C19.9-Rectosigmoid junction	Well differentiated; Grade I	Blank(s)	I	Blank(s)	Blank(s)	T1	Blank(s)	Blank(s)	N0	30	1 to 3 regional lymph nodes removed	Blank(s)	Blank(s)	18	160	3	0	3	3	0	20	No radiation and/or cancer-directed surgery	None	Alive or dead of other cause	Alive or dead due to cancer	100	Alive	One primary only	August	No/Unknown
4539901	2006	Female	80	White	Single (never married)	Ascending Colon	8481/3: Mucin-producing adenocarcinoma	C18.2-Ascending colon	Moderately differentiated; Grade II	Blank(s)	I	Blank(s)	Blank(s)	T2	Blank(s)	Blank(s)	N0	40	4 or more regional lymph nodes removed	Blank(s)	Blank(s)	25	200	3	0	3	12	0	20	No radiation and/or cancer-directed surgery	None	Alive or dead of other cause	Alive or dead due to cancer	95	Alive	One primary only	January	No/Unknown
4540031	2005	Female	62	Asian or Pacific Islander	Married (including common law)	Sigmoid Colon	8140/3: Adenocarcinoma, NOS	C18.7-Sigmoid colon	Poorly differentiated; Grade III	Blank(s)	IIA	Blank(s)	Blank(s)	T3	Blank(s)	Blank(s)	N0	30	1 to 3 regional lymph nodes removed	Blank(s)	Blank(s)	25	400	3	0	3	3	0	20	No radiation and/or cancer-directed surgery	None	Alive or dead of other cause	Alive or dead due to cancer	98	Alive	One primary only	October	No/Unknown
4540130	2005	Female	60	Asian or Pacific Islander	Married (including common law)	Rectum	8140/3: Adenocarcinoma, NOS	C20.9-Rectum, NOS	Moderately differentiated; Grade II	Blank(s)	I	Blank(s)	Blank(s)	T1	Blank(s)	Blank(s)	N0	30	4 or more regional lymph nodes removed	Blank(s)	Blank(s)	30	300	5	0	6	4	0	20	Radiation prior to surgery	Radiation, NOS method or source not specified	Alive or dead of other cause	Alive or dead due to cancer	98	Alive	One primary only	October	Yes
4540434	2005	Female	58	White	Married (including common law)	Descending Colon	8140/3: Adenocarcinoma, NOS	C18.6-Descending colon	Moderately differentiated; Grade II	Blank(s)	IIA	Blank(s)	Blank(s)	T3	Blank(s)	Blank(s)	N0	40	4 or more regional lymph nodes removed	Blank(s)	Blank(s)	45	450	3	0	3	24	0	10	No radiation and/or cancer-directed surgery	None	Alive or dead of other cause	Alive or dead due to cancer	98	Alive	One primary only	October	Yes
4540438	2005	Female	76	White	Married (including common law)	Hepatic Flexure	8140/3: Adenocarcinoma, NOS	C18.3-Hepatic flexure of colon	Moderately differentiated; Grade II	Blank(s)	IIIC	Blank(s)	Blank(s)	T3	Blank(s)	Blank(s)	N2	40	1 to 3 regional lymph nodes removed	Blank(s)	Blank(s)	40	400	3	100	3	8	4	998	No radiation and/or cancer-directed surgery	None	Dead (attributable to this cancer dx)	Alive or dead due to cancer	69	Colon excluding Rectum	One primary only	April	Yes
4540552	2005	Male	57	White	Single (never married)	Cecum	8140/3: Adenocarcinoma, NOS	C18.0-Cecum	Moderately differentiated; Grade II	Blank(s)	IIIB	Blank(s)	Blank(s)	T3	Blank(s)	Blank(s)	N1	40	4 or more regional lymph nodes removed	Blank(s)	Blank(s)	60	450	3	300	3	10	3	10	No radiation and/or cancer-directed surgery	None	Alive or dead of other cause	Alive or dead due to cancer	97	Alive	One primary only	November	Yes
4540556	2005	Female	70	Asian or Pacific Islander	Married (including common law)	Sigmoid Colon	8140/3: Adenocarcinoma, NOS	C18.7-Sigmoid colon	Moderately differentiated; Grade II	Blank(s)	IIIB	Blank(s)	Blank(s)	T3	Blank(s)	Blank(s)	N1	30	4 or more regional lymph nodes removed	Blank(s)	Blank(s)	40	400	3	300	3	7	3	999	Radiation after surgery	Beam radiation	Alive or dead of other cause	Alive or dead due to cancer	97	Alive	One primary only	November	Yes
4540642	2005	Male	73	White	Divorced	Cecum	8140/3: Adenocarcinoma, NOS	C18.0-Cecum	Poorly differentiated; Grade III	Blank(s)	IIIB	Blank(s)	Blank(s)	T3	Blank(s)	Blank(s)	N1	30	Number of regional lymph nodes removed unknown	Blank(s)	Blank(s)	55	450	3	300	3	97	97	998	No radiation and/or cancer-directed surgery	None	Dead (attributable to this cancer dx)	Alive or dead due to cancer	7	Colon excluding Rectum	One primary only	November	No/Unknown
4540709	2005	Male	79	Asian or Pacific Islander	Married (including common law)	Cecum	8140/3: Adenocarcinoma, NOS	C18.0-Cecum	Well differentiated; Grade I	Blank(s)	I	Blank(s)	Blank(s)	T2	Blank(s)	Blank(s)	N0	40	4 or more regional lymph nodes removed	Blank(s)	Blank(s)	15	200	3	0	3	13	0	999	No radiation and/or cancer-directed surgery	None	Alive or dead of other cause	Alive or dead due to cancer	97	Alive	One primary only	November	No/Unknown
4540723	2006	Female	59	White	Widowed	Sigmoid Colon	8140/3: Adenocarcinoma, NOS	C18.7-Sigmoid colon	Moderately differentiated; Grade II	Blank(s)	IIIA	Blank(s)	Blank(s)	T1	Blank(s)	Blank(s)	N1	30	4 or more regional lymph nodes removed	Blank(s)	Blank(s)	8	160	3	100	3	4	3	998	No radiation and/or cancer-directed surgery	Recommended, unknown if administered	Alive or dead of other cause	Dead (attributable to causes other than this cancer dx)	60	Accidents and Adverse Effects	One primary only	January	Yes
4540769	2005	Female	52	White	Married (including common law)	Cecum	8140/3: Adenocarcinoma, NOS	C18.0-Cecum	Poorly differentiated; Grade III	Blank(s)	IIIC	Blank(s)	Blank(s)	T3	Blank(s)	Blank(s)	N2	40	4 or more regional lymph nodes removed	Blank(s)	Blank(s)	35	400	3	300	3	42	7	20	No radiation and/or cancer-directed surgery	None	Alive or dead of other cause	Alive or dead due to cancer	98	Alive	One primary only	October	Yes
4540905	2005	Male	75	White	Married (including common law)	Rectum	8140/3: Adenocarcinoma, NOS	C20.9-Rectum, NOS	Moderately differentiated; Grade II	Blank(s)	IIA	Blank(s)	Blank(s)	T3	Blank(s)	Blank(s)	N0	50	None	Blank(s)	Blank(s)	25	400	5	0	0	0	98	998	Radiation prior to surgery	Beam radiation	Alive or dead of other cause	Alive or dead due to cancer	96	Alive	One primary only	December	Yes
[truncated: 80,933 more rows]
