# Supplementary material for: Impact of old age on resectable colorectal cancer outcomes
Source: PeerJ. 2019 Feb 15;7:e6350. doi: 10.7717/peerj.6350 (PMC6378948; doi:10.7717/peerj.6350)
Supplement: Supplemental Information 2 [file peerj-07-6350-s002.xlsx]

## Sheet: Sheet1
Patient ID	Year of diagnosis	Sex	Age at diagnosis	Race recode (W, B, AI, API)	Marital status at diagnosis	Site recode ICD-O-3/WHO 2008	ICD-O-3 Hist/behav, malignant	Primary Site - labeled	Grade	SEER modified AJCC stage 3rd (1988-2003)	Derived AJCC Stage Group, 6th ed (2004+)	Derived AJCC T, 7th ed (2010+)	T value - based on AJCC 3rd (1988-2003)	Derived AJCC T, 6th ed (2004+)	Derived AJCC N, 7th ed (2010+)	N value - based on AJCC 3rd (1988-2003)	Derived AJCC N, 6th ed (2004+)	RX Summ--Surg Prim Site (1998+)	RX Summ--Scope Reg LN Sur (2003+)	Scope of reg lymph nd surg (1998-2002)	RX Summ--Reg LN Examined (1998-2002)	CS tumor size (2004+)	CS extension (2004+)	CS Tumor Size/Ext Eval (2004+)	CS lymph nodes (2004+)	CS Reg Node Eval (2004+)	Regional nodes examined (1988+)	Regional nodes positive (1988+)	CS site-specific factor 1 (2004+ varying by schema)	Radiation sequence with surgery	Radiation	SEER cause-specific death classification	SEER other cause of death classification	Survival months	COD to site rec KM	Sequence number	Month of diagnosis	Chemotherapy recode (yes, no/unk)
49	1995	Male	61	Black	Widowed	Ascending Colon	8140/3: Adenocarcinoma, NOS	C18.2-Ascending colon	Moderately differentiated; Grade II	30	Blank(s)	Blank(s)	T4	Blank(s)	Blank(s)	N1	Blank(s)	Blank(s)	Blank(s)	Blank(s)	Blank(s)	Blank(s)	Blank(s)	Blank(s)	Blank(s)	Blank(s)	14	1	Blank(s)	No radiation and/or cancer-directed surgery	None	Dead (attributable to this cancer dx)	Alive or dead due to cancer	11	Colon excluding Rectum	One primary only	September	No/Unknown
523	1989	Male	63	White	Married (including common law)	Rectum	8140/3: Adenocarcinoma, NOS	C20.9-Rectum, NOS	Moderately differentiated; Grade II	20	Blank(s)	Blank(s)	T3	Blank(s)	Blank(s)	N0	Blank(s)	Blank(s)	Blank(s)	Blank(s)	Blank(s)	Blank(s)	Blank(s)	Blank(s)	Blank(s)	Blank(s)	9	0	Blank(s)	No radiation and/or cancer-directed surgery	Recommended, unknown if administered	Dead (attributable to this cancer dx)	Alive or dead due to cancer	137	Other Cause of Death	One primary only	June	No/Unknown
806	1995	Female	63	White	Married (including common law)	Cecum	8140/3: Adenocarcinoma, NOS	C18.0-Cecum	Well differentiated; Grade I	30	Blank(s)	Blank(s)	T3	Blank(s)	Blank(s)	N2	Blank(s)	Blank(s)	Blank(s)	Blank(s)	Blank(s)	Blank(s)	Blank(s)	Blank(s)	Blank(s)	Blank(s)	8	7	Blank(s)	No radiation and/or cancer-directed surgery	None	Dead (attributable to this cancer dx)	Alive or dead due to cancer	40	Colon excluding Rectum	One primary only	October	Yes
1211	1988	Female	64	White	Married (including common law)	Sigmoid Colon	8140/3: Adenocarcinoma, NOS	C18.7-Sigmoid colon	Moderately differentiated; Grade II	10	Blank(s)	Blank(s)	T2	Blank(s)	Blank(s)	N0	Blank(s)	Blank(s)	Blank(s)	Blank(s)	Blank(s)	Blank(s)	Blank(s)	Blank(s)	Blank(s)	Blank(s)	3	0	Blank(s)	No radiation and/or cancer-directed surgery	None	Dead (attributable to this cancer dx)	Alive or dead due to cancer	46	Colon excluding Rectum	One primary only	December	No/Unknown
1292	1990	Male	59	White	Married (including common law)	Descending Colon	8140/3: Adenocarcinoma, NOS	C18.6-Descending colon	Moderately differentiated; Grade II	20	Blank(s)	Blank(s)	T4	Blank(s)	Blank(s)	N0	Blank(s)	Blank(s)	Blank(s)	Blank(s)	Blank(s)	Blank(s)	Blank(s)	Blank(s)	Blank(s)	Blank(s)	4	0	Blank(s)	Radiation after surgery	Beam radiation	Dead (attributable to this cancer dx)	Alive or dead due to cancer	30	Colon excluding Rectum	One primary only	January	No/Unknown
1358	1990	Female	69	White	Widowed	Cecum	8480/3: Mucinous adenocarcinoma	C18.0-Cecum	Moderately differentiated; Grade II	20	Blank(s)	Blank(s)	T3	Blank(s)	Blank(s)	N0	Blank(s)	Blank(s)	Blank(s)	Blank(s)	Blank(s)	Blank(s)	Blank(s)	Blank(s)	Blank(s)	Blank(s)	23	0	Blank(s)	No radiation and/or cancer-directed surgery	None	Dead (attributable to this cancer dx)	Alive or dead due to cancer	41	Colon excluding Rectum	One primary only	May	No/Unknown
1928	1989	Female	70	White	Married (including common law)	Cecum	8140/3: Adenocarcinoma, NOS	C18.0-Cecum	Moderately differentiated; Grade II	20	Blank(s)	Blank(s)	T3	Blank(s)	Blank(s)	N0	Blank(s)	Blank(s)	Blank(s)	Blank(s)	Blank(s)	Blank(s)	Blank(s)	Blank(s)	Blank(s)	Blank(s)	12	0	Blank(s)	No radiation and/or cancer-directed surgery	None	Dead (attributable to this cancer dx)	Alive or dead due to cancer	51	Colon excluding Rectum	One primary only	March	No/Unknown
2355	1993	Male	77	Asian or Pacific Islander	Unknown	Rectosigmoid Junction	8140/3: Adenocarcinoma, NOS	C19.9-Rectosigmoid junction	Well differentiated; Grade I	20	Blank(s)	Blank(s)	T4	Blank(s)	Blank(s)	N0	Blank(s)	Blank(s)	Blank(s)	Blank(s)	Blank(s)	Blank(s)	Blank(s)	Blank(s)	Blank(s)	Blank(s)	0	98	Blank(s)	No radiation and/or cancer-directed surgery	None	Dead (attributable to this cancer dx)	Alive or dead due to cancer	11	Colon excluding Rectum	One primary only	February	No/Unknown
2866	1992	Female	66	Black	Unknown	Sigmoid Colon	8140/3: Adenocarcinoma, NOS	C18.7-Sigmoid colon	Poorly differentiated; Grade III	30	Blank(s)	Blank(s)	T3	Blank(s)	Blank(s)	N2	Blank(s)	Blank(s)	Blank(s)	Blank(s)	Blank(s)	Blank(s)	Blank(s)	Blank(s)	Blank(s)	Blank(s)	12	9	Blank(s)	No radiation and/or cancer-directed surgery	None	Dead (attributable to this cancer dx)	Alive or dead due to cancer	24	Colon excluding Rectum	One primary only	February	No/Unknown
3509	1999	Male	58	White	Married (including common law)	Rectosigmoid Junction	8140/3: Adenocarcinoma, NOS	C19.9-Rectosigmoid junction	Moderately differentiated; Grade II	10	Blank(s)	Blank(s)	T2	Blank(s)	Blank(s)	N0	Blank(s)	30	Blank(s)	1	7	Blank(s)	Blank(s)	Blank(s)	Blank(s)	Blank(s)	7	0	Blank(s)	No radiation and/or cancer-directed surgery	None	Alive or dead of other cause	Dead (attributable to causes other than this cancer dx)	129	Diseases of Heart	One primary only	May	No/Unknown
4530	1999	Male	57	White	Married (including common law)	Splenic Flexure	8140/3: Adenocarcinoma, NOS	C18.5-Splenic flexure of colon	Moderately differentiated; Grade II	30	Blank(s)	Blank(s)	T3	Blank(s)	Blank(s)	N2	Blank(s)	30	Blank(s)	1	8	Blank(s)	Blank(s)	Blank(s)	Blank(s)	Blank(s)	8	6	Blank(s)	No radiation and/or cancer-directed surgery	None	Alive or dead of other cause	Alive or dead due to cancer	178	Alive	One primary only	March	No/Unknown
4536	1996	Female	74	Asian or Pacific Islander	Married (including common law)	Rectum	8140/3: Adenocarcinoma, NOS	C20.9-Rectum, NOS	Moderately differentiated; Grade II	30	Blank(s)	Blank(s)	T3	Blank(s)	Blank(s)	N1	Blank(s)	Blank(s)	Blank(s)	Blank(s)	Blank(s)	Blank(s)	Blank(s)	Blank(s)	Blank(s)	Blank(s)	4	2	Blank(s)	Radiation after surgery	Beam radiation	Alive or dead of other cause	Dead (attributable to causes other than this cancer dx)	82	State DC not available or state DC available but no COD	One primary only	February	Yes
4846	2000	Female	79	White	Unknown	Sigmoid Colon	8140/3: Adenocarcinoma, NOS	C18.7-Sigmoid colon	Moderately differentiated; Grade II	20	Blank(s)	Blank(s)	T4	Blank(s)	Blank(s)	N0	Blank(s)	70	Blank(s)	1	7	Blank(s)	Blank(s)	Blank(s)	Blank(s)	Blank(s)	7	0	Blank(s)	No radiation and/or cancer-directed surgery	None	Dead (attributable to this cancer dx)	Alive or dead due to cancer	20	Colon excluding Rectum	One primary only	October	No/Unknown
5287	1994	Female	66	White	Married (including common law)	Ascending Colon	8140/3: Adenocarcinoma, NOS	C18.2-Ascending colon	Moderately differentiated; Grade II	30	Blank(s)	Blank(s)	T4	Blank(s)	Blank(s)	N1	Blank(s)	Blank(s)	Blank(s)	Blank(s)	Blank(s)	Blank(s)	Blank(s)	Blank(s)	Blank(s)	Blank(s)	5	2	Blank(s)	No radiation and/or cancer-directed surgery	None	Alive or dead of other cause	Alive or dead due to cancer	237	Alive	One primary only	March	Yes
5929	1991	Female	70	White	Married (including common law)	Rectosigmoid Junction	8140/3: Adenocarcinoma, NOS	C19.9-Rectosigmoid junction	Poorly differentiated; Grade III	30	Blank(s)	Blank(s)	T3	Blank(s)	Blank(s)	N1	Blank(s)	Blank(s)	Blank(s)	Blank(s)	Blank(s)	Blank(s)	Blank(s)	Blank(s)	Blank(s)	Blank(s)	12	3	Blank(s)	No radiation and/or cancer-directed surgery	None	Dead (attributable to this cancer dx)	Alive or dead due to cancer	21	Colon excluding Rectum	One primary only	October	No/Unknown
7687	1993	Male	68	Black	Divorced	Rectosigmoid Junction	8140/3: Adenocarcinoma, NOS	C19.9-Rectosigmoid junction	Moderately differentiated; Grade II	10	Blank(s)	Blank(s)	T2	Blank(s)	Blank(s)	N0	Blank(s)	Blank(s)	Blank(s)	Blank(s)	Blank(s)	Blank(s)	Blank(s)	Blank(s)	Blank(s)	Blank(s)	7	0	Blank(s)	No radiation and/or cancer-directed surgery	None	Dead (attributable to this cancer dx)	Alive or dead due to cancer	59	Colon excluding Rectum	One primary only	August	No/Unknown
8126	1990	Male	69	White	Married (including common law)	Cecum	8140/3: Adenocarcinoma, NOS	C18.0-Cecum	Poorly differentiated; Grade III	30	Blank(s)	Blank(s)	T3	Blank(s)	Blank(s)	N3	Blank(s)	Blank(s)	Blank(s)	Blank(s)	Blank(s)	Blank(s)	Blank(s)	Blank(s)	Blank(s)	Blank(s)	13	5	Blank(s)	No radiation and/or cancer-directed surgery	None	Dead (attributable to this cancer dx)	Alive or dead due to cancer	22	Colon excluding Rectum	One primary only	July	No/Unknown
8352	2001	Male	79	Black	Married (including common law)	Descending Colon	8140/3: Adenocarcinoma, NOS	C18.6-Descending colon	Well differentiated; Grade I	20	Blank(s)	Blank(s)	T3	Blank(s)	Blank(s)	N0	Blank(s)	40	Blank(s)	1	7	Blank(s)	Blank(s)	Blank(s)	Blank(s)	Blank(s)	7	0	Blank(s)	No radiation and/or cancer-directed surgery	None	Alive or dead of other cause	Dead (attributable to causes other than this cancer dx)	55	Diseases of Heart	One primary only	January	No/Unknown
8377	2001	Male	56	White	Divorced	Sigmoid Colon	8140/3: Adenocarcinoma, NOS	C18.7-Sigmoid colon	Moderately differentiated; Grade II	20	Blank(s)	Blank(s)	T4	Blank(s)	Blank(s)	N0	Blank(s)	40	Blank(s)	0	0	Blank(s)	Blank(s)	Blank(s)	Blank(s)	Blank(s)	8	0	Blank(s)	Radiation after surgery	Beam radiation	Alive or dead of other cause	Dead (attributable to causes other than this cancer dx)	100	Other Infectious and Parasitic Diseases including HIV	One primary only	May	Yes
8497	2002	Female	70	White	Married (including common law)	Descending Colon	8140/3: Adenocarcinoma, NOS	C18.6-Descending colon	Moderately differentiated; Grade II	20	Blank(s)	Blank(s)	T3	Blank(s)	Blank(s)	N0	Blank(s)	40	Blank(s)	1	8	Blank(s)	Blank(s)	Blank(s)	Blank(s)	Blank(s)	8	0	Blank(s)	No radiation and/or cancer-directed surgery	None	Alive or dead of other cause	Alive or dead due to cancer	143	Alive	One primary only	January	No/Unknown
8645	2002	Female	80	White	Single (never married)	Transverse Colon	8140/3: Adenocarcinoma, NOS	C18.4-Transverse colon	Moderately differentiated; Grade II	20	Blank(s)	Blank(s)	T3	Blank(s)	Blank(s)	N0	Blank(s)	40	Blank(s)	1	11	Blank(s)	Blank(s)	Blank(s)	Blank(s)	Blank(s)	11	0	Blank(s)	No radiation and/or cancer-directed surgery	None	Alive or dead of other cause	Alive or dead due to cancer	129	Alive	One primary only	January	No/Unknown
8682	1999	Male	53	White	Married (including common law)	Descending Colon	8140/3: Adenocarcinoma, NOS	C18.6-Descending colon	Moderately differentiated; Grade II	20	Blank(s)	Blank(s)	T3	Blank(s)	Blank(s)	N0	Blank(s)	40	Blank(s)	1	6	Blank(s)	Blank(s)	Blank(s)	Blank(s)	Blank(s)	6	0	Blank(s)	No radiation and/or cancer-directed surgery	None	Dead (attributable to this cancer dx)	Alive or dead due to cancer	35	Colon excluding Rectum	One primary only	March	Yes
9212	1991	Male	48	White	Married (including common law)	Rectum	8140/3: Adenocarcinoma, NOS	C20.9-Rectum, NOS	Moderately differentiated; Grade II	30	Blank(s)	Blank(s)	T3	Blank(s)	Blank(s)	N1	Blank(s)	Blank(s)	Blank(s)	Blank(s)	Blank(s)	Blank(s)	Blank(s)	Blank(s)	Blank(s)	Blank(s)	6	2	Blank(s)	Radiation after surgery	Beam radiation	Dead (attributable to this cancer dx)	Alive or dead due to cancer	44	Colon excluding Rectum	One primary only	May	Yes
9669	1989	Male	42	White	Single (never married)	Hepatic Flexure	8140/3: Adenocarcinoma, NOS	C18.3-Hepatic flexure of colon	Moderately differentiated; Grade II	10	Blank(s)	Blank(s)	T2	Blank(s)	Blank(s)	N0	Blank(s)	Blank(s)	Blank(s)	Blank(s)	Blank(s)	Blank(s)	Blank(s)	Blank(s)	Blank(s)	Blank(s)	12	0	Blank(s)	No radiation and/or cancer-directed surgery	None	Alive or dead of other cause	Alive or dead due to cancer	295	Alive	One primary only	May	No/Unknown
9681	2001	Male	42	Asian or Pacific Islander	Single (never married)	Rectum	8140/3: Adenocarcinoma, NOS	C20.9-Rectum, NOS	Poorly differentiated; Grade III	30	Blank(s)	Blank(s)	T3	Blank(s)	Blank(s)	N1	Blank(s)	30	Blank(s)	1	5	Blank(s)	Blank(s)	Blank(s)	Blank(s)	Blank(s)	5	2	Blank(s)	Radiation prior to surgery	Beam radiation	Alive or dead of other cause	Alive or dead due to cancer	149	Alive	One primary only	Blank(s)	Yes
9889	2002	Male	79	White	Married (including common law)	Cecum	8140/3: Adenocarcinoma, NOS	C18.0-Cecum	Moderately differentiated; Grade II	10	Blank(s)	Blank(s)	T2	Blank(s)	Blank(s)	N0	Blank(s)	40	Blank(s)	1	8	Blank(s)	Blank(s)	Blank(s)	Blank(s)	Blank(s)	8	0	Blank(s)	No radiation and/or cancer-directed surgery	None	Alive or dead of other cause	Dead (attributable to causes other than this cancer dx)	98	Chronic Obstructive Pulmonary Disease and Allied Cond	One primary only	June	No/Unknown
10552	1992	Male	61	White	Divorced	Descending Colon	8140/3: Adenocarcinoma, NOS	C18.6-Descending colon	Moderately differentiated; Grade II	30	Blank(s)	Blank(s)	T4	Blank(s)	Blank(s)	N1	Blank(s)	Blank(s)	Blank(s)	Blank(s)	Blank(s)	Blank(s)	Blank(s)	Blank(s)	Blank(s)	Blank(s)	18	2	Blank(s)	No radiation and/or cancer-directed surgery	None	Dead (attributable to this cancer dx)	Alive or dead due to cancer	37	Colon excluding Rectum	One primary only	August	Yes
1028441	1988	Female	34	Black	Single (never married)	Sigmoid Colon	8140/3: Adenocarcinoma, NOS	C18.7-Sigmoid colon	Moderately differentiated; Grade II	20	Blank(s)	Blank(s)	T3	Blank(s)	Blank(s)	N0	Blank(s)	Blank(s)	Blank(s)	Blank(s)	Blank(s)	Blank(s)	Blank(s)	Blank(s)	Blank(s)	Blank(s)	9	0	Blank(s)	No radiation and/or cancer-directed surgery	None	Alive or dead of other cause	Alive or dead due to cancer	311	Alive	One primary only	January	No/Unknown
1028891	1988	Female	63	Black	Married (including common law)	Rectum	8140/3: Adenocarcinoma, NOS	C20.9-Rectum, NOS	Moderately differentiated; Grade II	10	Blank(s)	Blank(s)	T2	Blank(s)	Blank(s)	N0	Blank(s)	Blank(s)	Blank(s)	Blank(s)	Blank(s)	Blank(s)	Blank(s)	Blank(s)	Blank(s)	Blank(s)	17	0	Blank(s)	No radiation and/or cancer-directed surgery	None	Alive or dead of other cause	Dead (attributable to causes other than this cancer dx)	73	Diabetes Mellitus	One primary only	February	No/Unknown
1029745	1988	Female	73	Black	Widowed	Ascending Colon	8140/3: Adenocarcinoma, NOS	C18.2-Ascending colon	Moderately differentiated; Grade II	20	Blank(s)	Blank(s)	T3	Blank(s)	Blank(s)	N0	Blank(s)	Blank(s)	Blank(s)	Blank(s)	Blank(s)	Blank(s)	Blank(s)	Blank(s)	Blank(s)	Blank(s)	98	0	Blank(s)	No radiation and/or cancer-directed surgery	None	Alive or dead of other cause	Dead (attributable to causes other than this cancer dx)	143	Cerebrovascular Diseases	One primary only	January	No/Unknown
1030557	1988	Male	63	Black	Married (including common law)	Sigmoid Colon	8481/3: Mucin-producing adenocarcinoma	C18.7-Sigmoid colon	Moderately differentiated; Grade II	20	Blank(s)	Blank(s)	T3	Blank(s)	Blank(s)	N0	Blank(s)	Blank(s)	Blank(s)	Blank(s)	Blank(s)	Blank(s)	Blank(s)	Blank(s)	Blank(s)	Blank(s)	4	0	Blank(s)	No radiation and/or cancer-directed surgery	None	Alive or dead of other cause	Dead (attributable to causes other than this cancer dx)	93	Other Cause of Death	One primary only	April	No/Unknown
1030626	1988	Male	64	White	Married (including common law)	Ascending Colon	8140/3: Adenocarcinoma, NOS	C18.2-Ascending colon	Moderately differentiated; Grade II	20	Blank(s)	Blank(s)	T3	Blank(s)	Blank(s)	N0	Blank(s)	Blank(s)	Blank(s)	Blank(s)	Blank(s)	Blank(s)	Blank(s)	Blank(s)	Blank(s)	Blank(s)	6	0	Blank(s)	No radiation and/or cancer-directed surgery	None	Alive or dead of other cause	Alive or dead due to cancer	311	Alive	One primary only	January	No/Unknown
1031968	1988	Female	75	White	Married (including common law)	Rectosigmoid Junction	8140/3: Adenocarcinoma, NOS	C19.9-Rectosigmoid junction	Moderately differentiated; Grade II	20	Blank(s)	Blank(s)	T3	Blank(s)	Blank(s)	N0	Blank(s)	Blank(s)	Blank(s)	Blank(s)	Blank(s)	Blank(s)	Blank(s)	Blank(s)	Blank(s)	Blank(s)	1	0	Blank(s)	No radiation and/or cancer-directed surgery	None	Alive or dead of other cause	Dead (attributable to causes other than this cancer dx)	161	Cerebrovascular Diseases	One primary only	January	No/Unknown
1032357	1988	Female	80	White	Widowed	Sigmoid Colon	8140/3: Adenocarcinoma, NOS	C18.7-Sigmoid colon	Poorly differentiated; Grade III	20	Blank(s)	Blank(s)	T3	Blank(s)	Blank(s)	N0	Blank(s)	Blank(s)	Blank(s)	Blank(s)	Blank(s)	Blank(s)	Blank(s)	Blank(s)	Blank(s)	Blank(s)	1	0	Blank(s)	No radiation and/or cancer-directed surgery	None	Dead (attributable to this cancer dx)	Alive or dead due to cancer	5	Colon excluding Rectum	One primary only	February	No/Unknown
1032510	1988	Female	80	White	Widowed	Cecum	8140/3: Adenocarcinoma, NOS	C18.0-Cecum	Well differentiated; Grade I	10	Blank(s)	Blank(s)	T2	Blank(s)	Blank(s)	N0	Blank(s)	Blank(s)	Blank(s)	Blank(s)	Blank(s)	Blank(s)	Blank(s)	Blank(s)	Blank(s)	Blank(s)	18	0	Blank(s)	No radiation and/or cancer-directed surgery	None	Alive or dead of other cause	Dead (attributable to causes other than this cancer dx)	127	Chronic Obstructive Pulmonary Disease and Allied Cond	One primary only	March	No/Unknown
1034243	1988	Female	59	White	Widowed	Ascending Colon	8140/3: Adenocarcinoma, NOS	C18.2-Ascending colon	Moderately differentiated; Grade II	20	Blank(s)	Blank(s)	T3	Blank(s)	Blank(s)	N0	Blank(s)	Blank(s)	Blank(s)	Blank(s)	Blank(s)	Blank(s)	Blank(s)	Blank(s)	Blank(s)	Blank(s)	13	0	Blank(s)	No radiation and/or cancer-directed surgery	None	Alive or dead of other cause	Dead (attributable to causes other than this cancer dx)	304	State DC not available or state DC available but no COD	One primary only	January	No/Unknown
1034635	1988	Female	64	White	Married (including common law)	Sigmoid Colon	8140/3: Adenocarcinoma, NOS	C18.7-Sigmoid colon	Moderately differentiated; Grade II	20	Blank(s)	Blank(s)	T4	Blank(s)	Blank(s)	N0	Blank(s)	Blank(s)	Blank(s)	Blank(s)	Blank(s)	Blank(s)	Blank(s)	Blank(s)	Blank(s)	Blank(s)	3	0	Blank(s)	No radiation and/or cancer-directed surgery	None	Dead (attributable to this cancer dx)	Alive or dead due to cancer	48	Colon excluding Rectum	One primary only	January	No/Unknown
1035043	1988	Female	76	White	Widowed	Sigmoid Colon	8140/3: Adenocarcinoma, NOS	C18.7-Sigmoid colon	Moderately differentiated; Grade II	30	Blank(s)	Blank(s)	T4	Blank(s)	Blank(s)	N1	Blank(s)	Blank(s)	Blank(s)	Blank(s)	Blank(s)	Blank(s)	Blank(s)	Blank(s)	Blank(s)	Blank(s)	22	1	Blank(s)	No radiation and/or cancer-directed surgery	None	Dead (attributable to this cancer dx)	Alive or dead due to cancer	13	Colon excluding Rectum	One primary only	January	No/Unknown
1036803	1988	Female	53	White	Single (never married)	Hepatic Flexure	8140/3: Adenocarcinoma, NOS	C18.3-Hepatic flexure of colon	Moderately differentiated; Grade II	20	Blank(s)	Blank(s)	T3	Blank(s)	Blank(s)	N0	Blank(s)	Blank(s)	Blank(s)	Blank(s)	Blank(s)	Blank(s)	Blank(s)	Blank(s)	Blank(s)	Blank(s)	18	0	Blank(s)	No radiation and/or cancer-directed surgery	None	Alive or dead of other cause	Dead (attributable to causes other than this cancer dx)	144	Diseases of Heart	One primary only	February	No/Unknown
1037022	1988	Female	52	White	Married (including common law)	Rectosigmoid Junction	8140/3: Adenocarcinoma, NOS	C19.9-Rectosigmoid junction	Moderately differentiated; Grade II	20	Blank(s)	Blank(s)	T3	Blank(s)	Blank(s)	N0	Blank(s)	Blank(s)	Blank(s)	Blank(s)	Blank(s)	Blank(s)	Blank(s)	Blank(s)	Blank(s)	Blank(s)	10	0	Blank(s)	No radiation and/or cancer-directed surgery	None	Alive or dead of other cause	Alive or dead due to cancer	311	Alive	One primary only	January	No/Unknown
1038782	1988	Female	60	Asian or Pacific Islander	Married (including common law)	Rectum	8140/3: Adenocarcinoma, NOS	C20.9-Rectum, NOS	Moderately differentiated; Grade II	10	Blank(s)	Blank(s)	T2	Blank(s)	Blank(s)	N0	Blank(s)	Blank(s)	Blank(s)	Blank(s)	Blank(s)	Blank(s)	Blank(s)	Blank(s)	Blank(s)	Blank(s)	98	0	Blank(s)	No radiation and/or cancer-directed surgery	None	Alive or dead of other cause	Alive or dead due to cancer	310	Alive	One primary only	February	No/Unknown
1038794	1988	Male	62	Asian or Pacific Islander	Married (including common law)	Rectosigmoid Junction	8140/3: Adenocarcinoma, NOS	C19.9-Rectosigmoid junction	Well differentiated; Grade I	20	Blank(s)	Blank(s)	T3	Blank(s)	Blank(s)	N0	Blank(s)	Blank(s)	Blank(s)	Blank(s)	Blank(s)	Blank(s)	Blank(s)	Blank(s)	Blank(s)	Blank(s)	3	0	Blank(s)	No radiation and/or cancer-directed surgery	None	Alive or dead of other cause	Alive or dead due to cancer	311	Alive	One primary only	January	No/Unknown
1039013	1988	Male	55	Black	Single (never married)	Sigmoid Colon	8140/3: Adenocarcinoma, NOS	C18.7-Sigmoid colon	Moderately differentiated; Grade II	10	Blank(s)	Blank(s)	T1	Blank(s)	Blank(s)	N0	Blank(s)	Blank(s)	Blank(s)	Blank(s)	Blank(s)	Blank(s)	Blank(s)	Blank(s)	Blank(s)	Blank(s)	10	0	Blank(s)	No radiation and/or cancer-directed surgery	None	Alive or dead of other cause	Dead (attributable to causes other than this cancer dx)	186	Diseases of Heart	One primary only	February	No/Unknown
1041321	1988	Male	76	White	Married (including common law)	Ascending Colon	8140/3: Adenocarcinoma, NOS	C18.2-Ascending colon	Poorly differentiated; Grade III	20	Blank(s)	Blank(s)	T3	Blank(s)	Blank(s)	N0	Blank(s)	Blank(s)	Blank(s)	Blank(s)	Blank(s)	Blank(s)	Blank(s)	Blank(s)	Blank(s)	Blank(s)	98	0	Blank(s)	No radiation and/or cancer-directed surgery	None	Alive or dead of other cause	Dead (attributable to causes other than this cancer dx)	289	Diseases of Heart	One primary only	July	No/Unknown
1044695	1988	Male	77	White	Married (including common law)	Rectum	8140/3: Adenocarcinoma, NOS	C20.9-Rectum, NOS	Moderately differentiated; Grade II	20	Blank(s)	Blank(s)	T3	Blank(s)	Blank(s)	N0	Blank(s)	Blank(s)	Blank(s)	Blank(s)	Blank(s)	Blank(s)	Blank(s)	Blank(s)	Blank(s)	Blank(s)	3	0	Blank(s)	No radiation and/or cancer-directed surgery	None	Alive or dead of other cause	Dead (attributable to causes other than this cancer dx)	70	Diseases of Heart	One primary only	January	No/Unknown
1045220	1988	Male	67	White	Married (including common law)	Rectum	8140/3: Adenocarcinoma, NOS	C20.9-Rectum, NOS	Moderately differentiated; Grade II	10	Blank(s)	Blank(s)	T1	Blank(s)	Blank(s)	N0	Blank(s)	Blank(s)	Blank(s)	Blank(s)	Blank(s)	Blank(s)	Blank(s)	Blank(s)	Blank(s)	Blank(s)	0	98	Blank(s)	No radiation and/or cancer-directed surgery	None	Alive or dead of other cause	Dead (attributable to causes other than this cancer dx)	132	Diseases of Heart	One primary only	January	No/Unknown
1045745	1988	Male	77	White	Married (including common law)	Sigmoid Colon	8140/3: Adenocarcinoma, NOS	C18.7-Sigmoid colon	Poorly differentiated; Grade III	10	Blank(s)	Blank(s)	T1	Blank(s)	Blank(s)	N0	Blank(s)	Blank(s)	Blank(s)	Blank(s)	Blank(s)	Blank(s)	Blank(s)	Blank(s)	Blank(s)	Blank(s)	8	0	Blank(s)	No radiation and/or cancer-directed surgery	None	Alive or dead of other cause	Dead (attributable to causes other than this cancer dx)	152	Diseases of Heart	One primary only	February	No/Unknown
1045958	1988	Female	72	White	Single (never married)	Cecum	8140/3: Adenocarcinoma, NOS	C18.0-Cecum	Moderately differentiated; Grade II	20	Blank(s)	Blank(s)	T3	Blank(s)	Blank(s)	N0	Blank(s)	Blank(s)	Blank(s)	Blank(s)	Blank(s)	Blank(s)	Blank(s)	Blank(s)	Blank(s)	Blank(s)	98	0	Blank(s)	No radiation and/or cancer-directed surgery	None	Alive or dead of other cause	Alive or dead due to cancer	57	Alive	One primary only	April	No/Unknown
1046533	1988	Male	66	White	Widowed	Ascending Colon	8140/3: Adenocarcinoma, NOS	C18.2-Ascending colon	Moderately differentiated; Grade II	20	Blank(s)	Blank(s)	T3	Blank(s)	Blank(s)	N0	Blank(s)	Blank(s)	Blank(s)	Blank(s)	Blank(s)	Blank(s)	Blank(s)	Blank(s)	Blank(s)	Blank(s)	98	0	Blank(s)	No radiation and/or cancer-directed surgery	None	Alive or dead of other cause	Dead (attributable to causes other than this cancer dx)	250	Other Cause of Death	One primary only	April	No/Unknown
1751781	1988	Male	63	White	Married (including common law)	Rectum	8140/3: Adenocarcinoma, NOS	C20.9-Rectum, NOS	Moderately differentiated; Grade II	10	Blank(s)	Blank(s)	T1	Blank(s)	Blank(s)	N0	Blank(s)	Blank(s)	Blank(s)	Blank(s)	Blank(s)	Blank(s)	Blank(s)	Blank(s)	Blank(s)	Blank(s)	10	0	Blank(s)	No radiation and/or cancer-directed surgery	None	Alive or dead of other cause	Dead (attributable to causes other than this cancer dx)	283	Alzheimers (ICD-9 and 10 only)	One primary only	February	No/Unknown
1752092	1988	Female	70	Black	Married (including common law)	Cecum	8140/3: Adenocarcinoma, NOS	C18.0-Cecum	Moderately differentiated; Grade II	30	Blank(s)	Blank(s)	T2	Blank(s)	Blank(s)	N1	Blank(s)	Blank(s)	Blank(s)	Blank(s)	Blank(s)	Blank(s)	Blank(s)	Blank(s)	Blank(s)	Blank(s)	14	1	Blank(s)	No radiation and/or cancer-directed surgery	None	Alive or dead of other cause	Alive or dead due to cancer	306	Alive	One primary only	Blank(s)	No/Unknown
1754146	1988	Male	69	White	Single (never married)	Transverse Colon	8140/3: Adenocarcinoma, NOS	C18.4-Transverse colon	Moderately differentiated; Grade II	20	Blank(s)	Blank(s)	T4	Blank(s)	Blank(s)	N0	Blank(s)	Blank(s)	Blank(s)	Blank(s)	Blank(s)	Blank(s)	Blank(s)	Blank(s)	Blank(s)	Blank(s)	15	0	Blank(s)	No radiation and/or cancer-directed surgery	None	Alive or dead of other cause	Dead (attributable to causes other than this cancer dx)	69	Suicide and Self-Inflicted Injury	One primary only	January	No/Unknown
1754637	1988	Male	45	White	Married (including common law)	Transverse Colon	8140/3: Adenocarcinoma, NOS	C18.4-Transverse colon	Poorly differentiated; Grade III	30	Blank(s)	Blank(s)	T4	Blank(s)	Blank(s)	N2	Blank(s)	Blank(s)	Blank(s)	Blank(s)	Blank(s)	Blank(s)	Blank(s)	Blank(s)	Blank(s)	Blank(s)	9	8	Blank(s)	No radiation and/or cancer-directed surgery	None	Dead (attributable to this cancer dx)	Alive or dead due to cancer	4	Colon excluding Rectum	One primary only	February	No/Unknown
1755272	1988	Male	64	White	Married (including common law)	Cecum	8140/3: Adenocarcinoma, NOS	C18.0-Cecum	Moderately differentiated; Grade II	20	Blank(s)	Blank(s)	T3	Blank(s)	Blank(s)	N0	Blank(s)	Blank(s)	Blank(s)	Blank(s)	Blank(s)	Blank(s)	Blank(s)	Blank(s)	Blank(s)	Blank(s)	19	0	Blank(s)	No radiation and/or cancer-directed surgery	None	Alive or dead of other cause	Alive or dead due to cancer	311	Alive	One primary only	January	No/Unknown
1755908	1988	Female	51	Asian or Pacific Islander	Married (including common law)	Rectum	8140/3: Adenocarcinoma, NOS	C20.9-Rectum, NOS	Well differentiated; Grade I	30	Blank(s)	Blank(s)	T4	Blank(s)	Blank(s)	N1	Blank(s)	Blank(s)	Blank(s)	Blank(s)	Blank(s)	Blank(s)	Blank(s)	Blank(s)	Blank(s)	Blank(s)	34	3	Blank(s)	Radiation after surgery	Beam radiation	Dead (attributable to this cancer dx)	Alive or dead due to cancer	46	Colon excluding Rectum	One primary only	February	No/Unknown
1756119	1988	Female	62	Black	Widowed	Rectosigmoid Junction	8140/3: Adenocarcinoma, NOS	C19.9-Rectosigmoid junction	Moderately differentiated; Grade II	30	Blank(s)	Blank(s)	T4	Blank(s)	Blank(s)	N2	Blank(s)	Blank(s)	Blank(s)	Blank(s)	Blank(s)	Blank(s)	Blank(s)	Blank(s)	Blank(s)	Blank(s)	18	4	Blank(s)	No radiation and/or cancer-directed surgery	None	Dead (attributable to this cancer dx)	Alive or dead due to cancer	47	Colon excluding Rectum	One primary only	March	No/Unknown
1756281	1988	Male	71	Asian or Pacific Islander	Married (including common law)	Hepatic Flexure	8140/3: Adenocarcinoma, NOS	C18.3-Hepatic flexure of colon	Moderately differentiated; Grade II	20	Blank(s)	Blank(s)	T4	Blank(s)	Blank(s)	N0	Blank(s)	Blank(s)	Blank(s)	Blank(s)	Blank(s)	Blank(s)	Blank(s)	Blank(s)	Blank(s)	Blank(s)	5	0	Blank(s)	No radiation and/or cancer-directed surgery	None	Alive or dead of other cause	Dead (attributable to causes other than this cancer dx)	48	Diseases of Heart	One primary only	February	No/Unknown
1757197	1988	Female	55	Asian or Pacific Islander	Married (including common law)	Sigmoid Colon	8140/3: Adenocarcinoma, NOS	C18.7-Sigmoid colon	Moderately differentiated; Grade II	30	Blank(s)	Blank(s)	T3	Blank(s)	Blank(s)	N1	Blank(s)	Blank(s)	Blank(s)	Blank(s)	Blank(s)	Blank(s)	Blank(s)	Blank(s)	Blank(s)	Blank(s)	4	1	Blank(s)	No radiation and/or cancer-directed surgery	None	Dead (attributable to this cancer dx)	Alive or dead due to cancer	100	Colon excluding Rectum	One primary only	February	No/Unknown
1757736	1988	Male	37	White	Married (including common law)	Rectum	8140/3: Adenocarcinoma, NOS	C20.9-Rectum, NOS	Poorly differentiated; Grade III	20	Blank(s)	Blank(s)	T3	Blank(s)	Blank(s)	N0	Blank(s)	Blank(s)	Blank(s)	Blank(s)	Blank(s)	Blank(s)	Blank(s)	Blank(s)	Blank(s)	Blank(s)	7	0	Blank(s)	Radiation prior to surgery	Beam radiation	Alive or dead of other cause	Dead (attributable to causes other than this cancer dx)	168	Chronic Liver Disease and Cirrhosis	One primary only	February	No/Unknown
1758892	1988	Male	80	White	Single (never married)	Sigmoid Colon	8140/3: Adenocarcinoma, NOS	C18.7-Sigmoid colon	Moderately differentiated; Grade II	20	Blank(s)	Blank(s)	T3	Blank(s)	Blank(s)	N0	Blank(s)	Blank(s)	Blank(s)	Blank(s)	Blank(s)	Blank(s)	Blank(s)	Blank(s)	Blank(s)	Blank(s)	1	0	Blank(s)	No radiation and/or cancer-directed surgery	None	Dead (attributable to this cancer dx)	Alive or dead due to cancer	41	Colon excluding Rectum	One primary only	February	No/Unknown
1759275	1988	Male	64	Asian or Pacific Islander	Single (never married)	Sigmoid Colon	8140/3: Adenocarcinoma, NOS	C18.7-Sigmoid colon	Moderately differentiated; Grade II	20	Blank(s)	Blank(s)	T4	Blank(s)	Blank(s)	N0	Blank(s)	Blank(s)	Blank(s)	Blank(s)	Blank(s)	Blank(s)	Blank(s)	Blank(s)	Blank(s)	Blank(s)	31	0	Blank(s)	No radiation and/or cancer-directed surgery	None	Alive or dead of other cause	Dead (attributable to causes other than this cancer dx)	121	Diseases of Heart	One primary only	March	No/Unknown
1759541	1988	Female	53	White	Married (including common law)	Rectum	8140/3: Adenocarcinoma, NOS	C20.9-Rectum, NOS	Poorly differentiated; Grade III	30	Blank(s)	Blank(s)	T3	Blank(s)	Blank(s)	N1	Blank(s)	Blank(s)	Blank(s)	Blank(s)	Blank(s)	Blank(s)	Blank(s)	Blank(s)	Blank(s)	Blank(s)	9	2	Blank(s)	Radiation after surgery	Beam radiation	Dead (attributable to this cancer dx)	Alive or dead due to cancer	79	Colon excluding Rectum	One primary only	March	Yes
1760122	1988	Male	69	White	Married (including common law)	Sigmoid Colon	8140/3: Adenocarcinoma, NOS	C18.7-Sigmoid colon	Moderately differentiated; Grade II	10	Blank(s)	Blank(s)	T2	Blank(s)	Blank(s)	N0	Blank(s)	Blank(s)	Blank(s)	Blank(s)	Blank(s)	Blank(s)	Blank(s)	Blank(s)	Blank(s)	Blank(s)	9	0	Blank(s)	No radiation and/or cancer-directed surgery	None	Alive or dead of other cause	Dead (attributable to causes other than this cancer dx)	33	Diseases of Heart	One primary only	April	No/Unknown
1762784	1988	Male	63	Black	Married (including common law)	Rectosigmoid Junction	8140/3: Adenocarcinoma, NOS	C19.9-Rectosigmoid junction	Well differentiated; Grade I	30	Blank(s)	Blank(s)	T3	Blank(s)	Blank(s)	N1	Blank(s)	Blank(s)	Blank(s)	Blank(s)	Blank(s)	Blank(s)	Blank(s)	Blank(s)	Blank(s)	Blank(s)	12	1	Blank(s)	No radiation and/or cancer-directed surgery	None	Alive or dead of other cause	Alive or dead due to cancer	307	Alive	One primary only	May	No/Unknown
1764720	1988	Female	78	White	Divorced	Cecum	8140/3: Adenocarcinoma, NOS	C18.0-Cecum	Poorly differentiated; Grade III	10	Blank(s)	Blank(s)	T2	Blank(s)	Blank(s)	N0	Blank(s)	Blank(s)	Blank(s)	Blank(s)	Blank(s)	Blank(s)	Blank(s)	Blank(s)	Blank(s)	Blank(s)	12	0	Blank(s)	No radiation and/or cancer-directed surgery	None	Alive or dead of other cause	Dead (attributable to causes other than this cancer dx)	209	Diseases of Heart	One primary only	March	No/Unknown
1765339	1988	Male	53	White	Married (including common law)	Rectosigmoid Junction	8140/3: Adenocarcinoma, NOS	C19.9-Rectosigmoid junction	Moderately differentiated; Grade II	20	Blank(s)	Blank(s)	T3	Blank(s)	Blank(s)	N0	Blank(s)	Blank(s)	Blank(s)	Blank(s)	Blank(s)	Blank(s)	Blank(s)	Blank(s)	Blank(s)	Blank(s)	14	0	Blank(s)	No radiation and/or cancer-directed surgery	None	Dead (attributable to this cancer dx)	Alive or dead due to cancer	24	Rectum and Rectosigmoid Junction	One primary only	March	No/Unknown
1765453	1988	Male	80	White	Married (including common law)	Rectosigmoid Junction	8140/3: Adenocarcinoma, NOS	C19.9-Rectosigmoid junction	Moderately differentiated; Grade II	20	Blank(s)	Blank(s)	T3	Blank(s)	Blank(s)	N0	Blank(s)	Blank(s)	Blank(s)	Blank(s)	Blank(s)	Blank(s)	Blank(s)	Blank(s)	Blank(s)	Blank(s)	12	0	Blank(s)	No radiation and/or cancer-directed surgery	None	Alive or dead of other cause	Dead (attributable to causes other than this cancer dx)	222	Diseases of Heart	One primary only	March	No/Unknown
1765654	1988	Male	68	White	Married (including common law)	Rectum	8140/3: Adenocarcinoma, NOS	C20.9-Rectum, NOS	Moderately differentiated; Grade II	20	Blank(s)	Blank(s)	T3	Blank(s)	Blank(s)	N0	Blank(s)	Blank(s)	Blank(s)	Blank(s)	Blank(s)	Blank(s)	Blank(s)	Blank(s)	Blank(s)	Blank(s)	11	0	Blank(s)	No radiation and/or cancer-directed surgery	None	Alive or dead of other cause	Dead (attributable to causes other than this cancer dx)	175	Chronic Obstructive Pulmonary Disease and Allied Cond	One primary only	April	No/Unknown
1766146	1988	Male	79	White	Married (including common law)	Cecum	8140/3: Adenocarcinoma, NOS	C18.0-Cecum	Moderately differentiated; Grade II	20	Blank(s)	Blank(s)	T3	Blank(s)	Blank(s)	N0	Blank(s)	Blank(s)	Blank(s)	Blank(s)	Blank(s)	Blank(s)	Blank(s)	Blank(s)	Blank(s)	Blank(s)	17	0	Blank(s)	No radiation and/or cancer-directed surgery	None	Dead (attributable to this cancer dx)	Alive or dead due to cancer	34	Colon excluding Rectum	One primary only	January	No/Unknown
1766495	1988	Male	77	White	Married (including common law)	Rectosigmoid Junction	8140/3: Adenocarcinoma, NOS	C19.9-Rectosigmoid junction	Moderately differentiated; Grade II	20	Blank(s)	Blank(s)	T3	Blank(s)	Blank(s)	N0	Blank(s)	Blank(s)	Blank(s)	Blank(s)	Blank(s)	Blank(s)	Blank(s)	Blank(s)	Blank(s)	Blank(s)	3	0	Blank(s)	No radiation and/or cancer-directed surgery	None	Alive or dead of other cause	Dead (attributable to causes other than this cancer dx)	63	Diseases of Heart	One primary only	March	No/Unknown
1769591	1988	Male	74	White	Married (including common law)	Hepatic Flexure	8140/3: Adenocarcinoma, NOS	C18.3-Hepatic flexure of colon	Poorly differentiated; Grade III	30	Blank(s)	Blank(s)	T3	Blank(s)	Blank(s)	N2	Blank(s)	Blank(s)	Blank(s)	Blank(s)	Blank(s)	Blank(s)	Blank(s)	Blank(s)	Blank(s)	Blank(s)	12	7	Blank(s)	No radiation and/or cancer-directed surgery	None	Dead (attributable to this cancer dx)	Alive or dead due to cancer	6	Colon excluding Rectum	One primary only	February	Yes
1769602	1988	Female	45	Black	Divorced	Sigmoid Colon	8140/3: Adenocarcinoma, NOS	C18.7-Sigmoid colon	Moderately differentiated; Grade II	30	Blank(s)	Blank(s)	T3	Blank(s)	Blank(s)	N1	Blank(s)	Blank(s)	Blank(s)	Blank(s)	Blank(s)	Blank(s)	Blank(s)	Blank(s)	Blank(s)	Blank(s)	11	2	Blank(s)	No radiation and/or cancer-directed surgery	None	Alive or dead of other cause	Alive or dead due to cancer	309	Alive	One primary only	March	No/Unknown
1770666	1988	Female	74	White	Married (including common law)	Rectum	8140/3: Adenocarcinoma, NOS	C20.9-Rectum, NOS	Moderately differentiated; Grade II	20	Blank(s)	Blank(s)	T3	Blank(s)	Blank(s)	N0	Blank(s)	Blank(s)	Blank(s)	Blank(s)	Blank(s)	Blank(s)	Blank(s)	Blank(s)	Blank(s)	Blank(s)	8	0	Blank(s)	No radiation and/or cancer-directed surgery	None	Dead (attributable to this cancer dx)	Alive or dead due to cancer	75	Colon excluding Rectum	One primary only	February	No/Unknown
1771259	1988	Female	67	White	Widowed	Sigmoid Colon	8481/3: Mucin-producing adenocarcinoma	C18.7-Sigmoid colon	Moderately differentiated; Grade II	10	Blank(s)	Blank(s)	T1	Blank(s)	Blank(s)	N0	Blank(s)	Blank(s)	Blank(s)	Blank(s)	Blank(s)	Blank(s)	Blank(s)	Blank(s)	Blank(s)	Blank(s)	1	0	Blank(s)	No radiation and/or cancer-directed surgery	None	Alive or dead of other cause	Dead (attributable to causes other than this cancer dx)	82	Hypertension without Heart Disease	One primary only	February	No/Unknown
1771332	1988	Female	57	White	Married (including common law)	Sigmoid Colon	8140/3: Adenocarcinoma, NOS	C18.7-Sigmoid colon	Moderately differentiated; Grade II	20	Blank(s)	Blank(s)	T3	Blank(s)	Blank(s)	N0	Blank(s)	Blank(s)	Blank(s)	Blank(s)	Blank(s)	Blank(s)	Blank(s)	Blank(s)	Blank(s)	Blank(s)	0	98	Blank(s)	No radiation and/or cancer-directed surgery	None	Dead (attributable to this cancer dx)	Alive or dead due to cancer	32	Colon excluding Rectum	One primary only	January	No/Unknown
1772268	1988	Female	68	White	Widowed	Rectosigmoid Junction	8480/3: Mucinous adenocarcinoma	C19.9-Rectosigmoid junction	Moderately differentiated; Grade II	30	Blank(s)	Blank(s)	T3	Blank(s)	Blank(s)	N1	Blank(s)	Blank(s)	Blank(s)	Blank(s)	Blank(s)	Blank(s)	Blank(s)	Blank(s)	Blank(s)	Blank(s)	4	1	Blank(s)	No radiation and/or cancer-directed surgery	None	Dead (attributable to this cancer dx)	Alive or dead due to cancer	1	Colon excluding Rectum	One primary only	May	No/Unknown
1773075	1988	Male	60	White	Unknown	Hepatic Flexure	8140/3: Adenocarcinoma, NOS	C18.3-Hepatic flexure of colon	Moderately differentiated; Grade II	20	Blank(s)	Blank(s)	T3	Blank(s)	Blank(s)	N0	Blank(s)	Blank(s)	Blank(s)	Blank(s)	Blank(s)	Blank(s)	Blank(s)	Blank(s)	Blank(s)	Blank(s)	98	0	Blank(s)	No radiation and/or cancer-directed surgery	None	Alive or dead of other cause	Alive or dead due to cancer	142	Alive	One primary only	January	No/Unknown
1773377	1988	Female	67	Black	Widowed	Cecum	8480/3: Mucinous adenocarcinoma	C18.0-Cecum	Well differentiated; Grade I	20	Blank(s)	Blank(s)	T3	Blank(s)	Blank(s)	N0	Blank(s)	Blank(s)	Blank(s)	Blank(s)	Blank(s)	Blank(s)	Blank(s)	Blank(s)	Blank(s)	Blank(s)	0	98	Blank(s)	No radiation and/or cancer-directed surgery	None	Dead (attributable to this cancer dx)	Alive or dead due to cancer	89	Colon excluding Rectum	One primary only	April	No/Unknown
1773878	1988	Female	49	White	Single (never married)	Splenic Flexure	8140/3: Adenocarcinoma, NOS	C18.5-Splenic flexure of colon	Moderately differentiated; Grade II	20	Blank(s)	Blank(s)	T3	Blank(s)	Blank(s)	N0	Blank(s)	Blank(s)	Blank(s)	Blank(s)	Blank(s)	Blank(s)	Blank(s)	Blank(s)	Blank(s)	Blank(s)	11	0	Blank(s)	No radiation and/or cancer-directed surgery	None	Alive or dead of other cause	Alive or dead due to cancer	306	Alive	One primary only	June	No/Unknown
1774087	1988	Female	60	White	Married (including common law)	Rectosigmoid Junction	8140/3: Adenocarcinoma, NOS	C19.9-Rectosigmoid junction	Moderately differentiated; Grade II	20	Blank(s)	Blank(s)	T3	Blank(s)	Blank(s)	N0	Blank(s)	Blank(s)	Blank(s)	Blank(s)	Blank(s)	Blank(s)	Blank(s)	Blank(s)	Blank(s)	Blank(s)	13	0	Blank(s)	Radiation after surgery	Beam radiation	Dead (attributable to this cancer dx)	Alive or dead due to cancer	173	Other Cause of Death	One primary only	April	No/Unknown
1774566	1988	Male	41	White	Married (including common law)	Rectosigmoid Junction	8140/3: Adenocarcinoma, NOS	C19.9-Rectosigmoid junction	Poorly differentiated; Grade III	30	Blank(s)	Blank(s)	T3	Blank(s)	Blank(s)	N2	Blank(s)	Blank(s)	Blank(s)	Blank(s)	Blank(s)	Blank(s)	Blank(s)	Blank(s)	Blank(s)	Blank(s)	23	9	Blank(s)	Radiation before and after surgery	Beam radiation	Alive or dead of other cause	Alive or dead due to cancer	311	Alive	One primary only	January	Yes
1775451	1988	Female	65	White	Single (never married)	Sigmoid Colon	8140/3: Adenocarcinoma, NOS	C18.7-Sigmoid colon	Well differentiated; Grade I	10	Blank(s)	Blank(s)	T2	Blank(s)	Blank(s)	N0	Blank(s)	Blank(s)	Blank(s)	Blank(s)	Blank(s)	Blank(s)	Blank(s)	Blank(s)	Blank(s)	Blank(s)	31	0	Blank(s)	No radiation and/or cancer-directed surgery	None	Alive or dead of other cause	Dead (attributable to causes other than this cancer dx)	251	Chronic Obstructive Pulmonary Disease and Allied Cond	One primary only	April	Yes
1775477	1988	Male	80	White	Married (including common law)	Cecum	8140/3: Adenocarcinoma, NOS	C18.0-Cecum	Moderately differentiated; Grade II	10	Blank(s)	Blank(s)	T2	Blank(s)	Blank(s)	N0	Blank(s)	Blank(s)	Blank(s)	Blank(s)	Blank(s)	Blank(s)	Blank(s)	Blank(s)	Blank(s)	Blank(s)	98	0	Blank(s)	No radiation and/or cancer-directed surgery	None	Alive or dead of other cause	Dead (attributable to causes other than this cancer dx)	199	Diseases of Heart	One primary only	May	No/Unknown
1775508	1988	Male	74	Black	Unknown	Ascending Colon	8140/3: Adenocarcinoma, NOS	C18.2-Ascending colon	Moderately differentiated; Grade II	20	Blank(s)	Blank(s)	T3	Blank(s)	Blank(s)	N0	Blank(s)	Blank(s)	Blank(s)	Blank(s)	Blank(s)	Blank(s)	Blank(s)	Blank(s)	Blank(s)	Blank(s)	7	0	Blank(s)	No radiation and/or cancer-directed surgery	None	Alive or dead of other cause	Dead (attributable to causes other than this cancer dx)	123	Diabetes Mellitus	One primary only	April	No/Unknown
1776170	1988	Male	79	White	Married (including common law)	Rectosigmoid Junction	8140/3: Adenocarcinoma, NOS	C19.9-Rectosigmoid junction	Moderately differentiated; Grade II	20	Blank(s)	Blank(s)	T3	Blank(s)	Blank(s)	N0	Blank(s)	Blank(s)	Blank(s)	Blank(s)	Blank(s)	Blank(s)	Blank(s)	Blank(s)	Blank(s)	Blank(s)	6	0	Blank(s)	Radiation after surgery	Beam radiation	Alive or dead of other cause	Dead (attributable to causes other than this cancer dx)	149	Pneumonia and Influenza	One primary only	May	No/Unknown
1777408	1988	Male	76	Black	Single (never married)	Hepatic Flexure	8140/3: Adenocarcinoma, NOS	C18.3-Hepatic flexure of colon	Moderately differentiated; Grade II	30	Blank(s)	Blank(s)	T3	Blank(s)	Blank(s)	N1	Blank(s)	Blank(s)	Blank(s)	Blank(s)	Blank(s)	Blank(s)	Blank(s)	Blank(s)	Blank(s)	Blank(s)	14	2	Blank(s)	No radiation and/or cancer-directed surgery	None	Alive or dead of other cause	Dead (attributable to causes other than this cancer dx)	35	Cerebrovascular Diseases	One primary only	March	No/Unknown
1778354	1988	Male	46	Black	Married (including common law)	Sigmoid Colon	8140/3: Adenocarcinoma, NOS	C18.7-Sigmoid colon	Moderately differentiated; Grade II	30	Blank(s)	Blank(s)	T4	Blank(s)	Blank(s)	N3	Blank(s)	Blank(s)	Blank(s)	Blank(s)	Blank(s)	Blank(s)	Blank(s)	Blank(s)	Blank(s)	Blank(s)	11	9	Blank(s)	No radiation and/or cancer-directed surgery	None	Dead (attributable to this cancer dx)	Alive or dead due to cancer	54	Colon excluding Rectum	One primary only	February	Yes
1778385	1988	Male	57	White	Single (never married)	Rectum	8140/3: Adenocarcinoma, NOS	C20.9-Rectum, NOS	Well differentiated; Grade I	10	Blank(s)	Blank(s)	T1	Blank(s)	Blank(s)	N0	Blank(s)	Blank(s)	Blank(s)	Blank(s)	Blank(s)	Blank(s)	Blank(s)	Blank(s)	Blank(s)	Blank(s)	4	0	Blank(s)	No radiation and/or cancer-directed surgery	None	Alive or dead of other cause	Alive or dead due to cancer	305	Alive	One primary only	July	No/Unknown
1778602	1988	Male	71	White	Married (including common law)	Splenic Flexure	8481/3: Mucin-producing adenocarcinoma	C18.5-Splenic flexure of colon	Moderately differentiated; Grade II	20	Blank(s)	Blank(s)	T3	Blank(s)	Blank(s)	N0	Blank(s)	Blank(s)	Blank(s)	Blank(s)	Blank(s)	Blank(s)	Blank(s)	Blank(s)	Blank(s)	Blank(s)	8	0	Blank(s)	No radiation and/or cancer-directed surgery	None	Dead (attributable to this cancer dx)	Alive or dead due to cancer	84	Colon excluding Rectum	One primary only	June	No/Unknown
1778629	1988	Male	74	White	Married (including common law)	Cecum	8140/3: Adenocarcinoma, NOS	C18.0-Cecum	Moderately differentiated; Grade II	20	Blank(s)	Blank(s)	T3	Blank(s)	Blank(s)	N0	Blank(s)	Blank(s)	Blank(s)	Blank(s)	Blank(s)	Blank(s)	Blank(s)	Blank(s)	Blank(s)	Blank(s)	9	0	Blank(s)	No radiation and/or cancer-directed surgery	None	Alive or dead of other cause	Dead (attributable to causes other than this cancer dx)	40	Other Cause of Death	One primary only	May	No/Unknown
1778995	1988	Female	72	White	Widowed	Rectum	8140/3: Adenocarcinoma, NOS	C20.9-Rectum, NOS	Moderately differentiated; Grade II	20	Blank(s)	Blank(s)	T3	Blank(s)	Blank(s)	N0	Blank(s)	Blank(s)	Blank(s)	Blank(s)	Blank(s)	Blank(s)	Blank(s)	Blank(s)	Blank(s)	Blank(s)	1	0	Blank(s)	Radiation prior to surgery	Beam radiation	Alive or dead of other cause	Dead (attributable to causes other than this cancer dx)	117	Chronic Obstructive Pulmonary Disease and Allied Cond	One primary only	February	No/Unknown
1779057	1988	Female	65	White	Married (including common law)	Sigmoid Colon	8140/3: Adenocarcinoma, NOS	C18.7-Sigmoid colon	Moderately differentiated; Grade II	20	Blank(s)	Blank(s)	T3	Blank(s)	Blank(s)	N0	Blank(s)	Blank(s)	Blank(s)	Blank(s)	Blank(s)	Blank(s)	Blank(s)	Blank(s)	Blank(s)	Blank(s)	9	0	Blank(s)	No radiation and/or cancer-directed surgery	None	Dead (attributable to this cancer dx)	Alive or dead due to cancer	43	Colon excluding Rectum	One primary only	June	Yes
1779479	1988	Male	67	White	Married (including common law)	Rectosigmoid Junction	8140/3: Adenocarcinoma, NOS	C19.9-Rectosigmoid junction	Poorly differentiated; Grade III	30	Blank(s)	Blank(s)	T3	Blank(s)	Blank(s)	N1	Blank(s)	Blank(s)	Blank(s)	Blank(s)	Blank(s)	Blank(s)	Blank(s)	Blank(s)	Blank(s)	Blank(s)	9	1	Blank(s)	No radiation and/or cancer-directed surgery	None	Dead (attributable to this cancer dx)	Alive or dead due to cancer	30	Colon excluding Rectum	One primary only	May	No/Unknown
1779858	1988	Male	59	White	Divorced	Ascending Colon	8140/3: Adenocarcinoma, NOS	C18.2-Ascending colon	Poorly differentiated; Grade III	30	Blank(s)	Blank(s)	T3	Blank(s)	Blank(s)	N2	Blank(s)	Blank(s)	Blank(s)	Blank(s)	Blank(s)	Blank(s)	Blank(s)	Blank(s)	Blank(s)	Blank(s)	5	4	Blank(s)	No radiation and/or cancer-directed surgery	None	Dead (attributable to this cancer dx)	Alive or dead due to cancer	32	Colon excluding Rectum	One primary only	May	No/Unknown
1779873	1988	Male	59	White	Married (including common law)	Rectum	8140/3: Adenocarcinoma, NOS	C20.9-Rectum, NOS	Poorly differentiated; Grade III	20	Blank(s)	Blank(s)	T3	Blank(s)	Blank(s)	N0	Blank(s)	Blank(s)	Blank(s)	Blank(s)	Blank(s)	Blank(s)	Blank(s)	Blank(s)	Blank(s)	Blank(s)	0	98	Blank(s)	Radiation after surgery	Beam radiation	Dead (attributable to this cancer dx)	Alive or dead due to cancer	16	Rectum and Rectosigmoid Junction	One primary only	March	No/Unknown
1779892	1988	Male	73	White	Married (including common law)	Ascending Colon	8140/3: Adenocarcinoma, NOS	C18.2-Ascending colon	Moderately differentiated; Grade II	20	Blank(s)	Blank(s)	T3	Blank(s)	Blank(s)	N0	Blank(s)	Blank(s)	Blank(s)	Blank(s)	Blank(s)	Blank(s)	Blank(s)	Blank(s)	Blank(s)	Blank(s)	8	0	Blank(s)	No radiation and/or cancer-directed surgery	None	Alive or dead of other cause	Dead (attributable to causes other than this cancer dx)	179	Alzheimers (ICD-9 and 10 only)	One primary only	February	No/Unknown
1780327	1988	Female	74	White	Widowed	Hepatic Flexure	8140/3: Adenocarcinoma, NOS	C18.3-Hepatic flexure of colon	Poorly differentiated; Grade III	20	Blank(s)	Blank(s)	T3	Blank(s)	Blank(s)	N0	Blank(s)	Blank(s)	Blank(s)	Blank(s)	Blank(s)	Blank(s)	Blank(s)	Blank(s)	Blank(s)	Blank(s)	9	0	Blank(s)	No radiation and/or cancer-directed surgery	None	Dead (attributable to this cancer dx)	Alive or dead due to cancer	136	Colon excluding Rectum	One primary only	March	No/Unknown
1780539	1988	Male	67	White	Married (including common law)	Hepatic Flexure	8140/3: Adenocarcinoma, NOS	C18.3-Hepatic flexure of colon	Moderately differentiated; Grade II	20	Blank(s)	Blank(s)	T3	Blank(s)	Blank(s)	N0	Blank(s)	Blank(s)	Blank(s)	Blank(s)	Blank(s)	Blank(s)	Blank(s)	Blank(s)	Blank(s)	Blank(s)	7	0	Blank(s)	No radiation and/or cancer-directed surgery	None	Dead (attributable to this cancer dx)	Alive or dead due to cancer	29	Colon excluding Rectum	One primary only	February	No/Unknown
1780783	1988	Female	80	White	Married (including common law)	Rectum	8140/3: Adenocarcinoma, NOS	C20.9-Rectum, NOS	Moderately differentiated; Grade II	10	Blank(s)	Blank(s)	T2	Blank(s)	Blank(s)	N0	Blank(s)	Blank(s)	Blank(s)	Blank(s)	Blank(s)	Blank(s)	Blank(s)	Blank(s)	Blank(s)	Blank(s)	6	0	Blank(s)	No radiation and/or cancer-directed surgery	None	Alive or dead of other cause	Dead (attributable to causes other than this cancer dx)	60	Nephritis, Nephrotic Syndrome and Nephrosis	One primary only	May	No/Unknown
1781104	1988	Male	59	White	Married (including common law)	Ascending Colon	8140/3: Adenocarcinoma, NOS	C18.2-Ascending colon	Poorly differentiated; Grade III	20	Blank(s)	Blank(s)	T3	Blank(s)	Blank(s)	N0	Blank(s)	Blank(s)	Blank(s)	Blank(s)	Blank(s)	Blank(s)	Blank(s)	Blank(s)	Blank(s)	Blank(s)	30	0	Blank(s)	No radiation and/or cancer-directed surgery	None	Alive or dead of other cause	Dead (attributable to causes other than this cancer dx)	213	State DC not available or state DC available but no COD	One primary only	January	No/Unknown
1781139	1988	Male	80	White	Married (including common law)	Sigmoid Colon	8140/3: Adenocarcinoma, NOS	C18.7-Sigmoid colon	Moderately differentiated; Grade II	20	Blank(s)	Blank(s)	T3	Blank(s)	Blank(s)	N0	Blank(s)	Blank(s)	Blank(s)	Blank(s)	Blank(s)	Blank(s)	Blank(s)	Blank(s)	Blank(s)	Blank(s)	10	0	Blank(s)	No radiation and/or cancer-directed surgery	None	Alive or dead of other cause	Dead (attributable to causes other than this cancer dx)	97	Diseases of Heart	One primary only	April	No/Unknown
1781565	1988	Female	65	White	Married (including common law)	Hepatic Flexure	8140/3: Adenocarcinoma, NOS	C18.3-Hepatic flexure of colon	Moderately differentiated; Grade II	20	Blank(s)	Blank(s)	T3	Blank(s)	Blank(s)	N0	Blank(s)	Blank(s)	Blank(s)	Blank(s)	Blank(s)	Blank(s)	Blank(s)	Blank(s)	Blank(s)	Blank(s)	1	0	Blank(s)	No radiation and/or cancer-directed surgery	None	Alive or dead of other cause	Alive or dead due to cancer	309	Alive	One primary only	March	No/Unknown
1783451	1988	Male	78	White	Married (including common law)	Cecum	8140/3: Adenocarcinoma, NOS	C18.0-Cecum	Moderately differentiated; Grade II	20	Blank(s)	Blank(s)	T4	Blank(s)	Blank(s)	N0	Blank(s)	Blank(s)	Blank(s)	Blank(s)	Blank(s)	Blank(s)	Blank(s)	Blank(s)	Blank(s)	Blank(s)	3	0	Blank(s)	No radiation and/or cancer-directed surgery	None	Alive or dead of other cause	Dead (attributable to causes other than this cancer dx)	81	Diabetes Mellitus	One primary only	March	No/Unknown
1784834	1988	Male	64	White	Single (never married)	Rectum	8140/3: Adenocarcinoma, NOS	C20.9-Rectum, NOS	Moderately differentiated; Grade II	20	Blank(s)	Blank(s)	T3	Blank(s)	Blank(s)	N0	Blank(s)	Blank(s)	Blank(s)	Blank(s)	Blank(s)	Blank(s)	Blank(s)	Blank(s)	Blank(s)	Blank(s)	3	0	Blank(s)	No radiation and/or cancer-directed surgery	None	Alive or dead of other cause	Dead (attributable to causes other than this cancer dx)	167	Hypertension without Heart Disease	One primary only	April	No/Unknown
1785027	1988	Male	47	White	Divorced	Cecum	8481/3: Mucin-producing adenocarcinoma	C18.0-Cecum	Moderately differentiated; Grade II	20	Blank(s)	Blank(s)	T3	Blank(s)	Blank(s)	N0	Blank(s)	Blank(s)	Blank(s)	Blank(s)	Blank(s)	Blank(s)	Blank(s)	Blank(s)	Blank(s)	Blank(s)	22	0	Blank(s)	No radiation and/or cancer-directed surgery	None	Alive or dead of other cause	Dead (attributable to causes other than this cancer dx)	278	State DC not available or state DC available but no COD	One primary only	May	Yes
1790440	1988	Male	52	Black	Married (including common law)	Rectosigmoid Junction	8140/3: Adenocarcinoma, NOS	C19.9-Rectosigmoid junction	Poorly differentiated; Grade III	20	Blank(s)	Blank(s)	T3	Blank(s)	Blank(s)	N0	Blank(s)	Blank(s)	Blank(s)	Blank(s)	Blank(s)	Blank(s)	Blank(s)	Blank(s)	Blank(s)	Blank(s)	7	0	Blank(s)	Radiation after surgery	Beam radiation	Alive or dead of other cause	Dead (attributable to causes other than this cancer dx)	59	Chronic Liver Disease and Cirrhosis	One primary only	April	No/Unknown
1791502	1988	Female	70	White	Widowed	Descending Colon	8140/3: Adenocarcinoma, NOS	C18.6-Descending colon	Poorly differentiated; Grade III	20	Blank(s)	Blank(s)	T3	Blank(s)	Blank(s)	N0	Blank(s)	Blank(s)	Blank(s)	Blank(s)	Blank(s)	Blank(s)	Blank(s)	Blank(s)	Blank(s)	Blank(s)	98	0	Blank(s)	No radiation and/or cancer-directed surgery	None	Dead (attributable to this cancer dx)	Alive or dead due to cancer	41	Colon excluding Rectum	One primary only	June	No/Unknown
1791760	1988	Male	56	White	Married (including common law)	Transverse Colon	8481/3: Mucin-producing adenocarcinoma	C18.4-Transverse colon	Moderately differentiated; Grade II	20	Blank(s)	Blank(s)	T3	Blank(s)	Blank(s)	N0	Blank(s)	Blank(s)	Blank(s)	Blank(s)	Blank(s)	Blank(s)	Blank(s)	Blank(s)	Blank(s)	Blank(s)	7	0	Blank(s)	No radiation and/or cancer-directed surgery	None	Alive or dead of other cause	Dead (attributable to causes other than this cancer dx)	167	Diseases of Heart	One primary only	March	No/Unknown
1792063	1988	Male	64	White	Divorced	Rectum	8140/3: Adenocarcinoma, NOS	C20.9-Rectum, NOS	Moderately differentiated; Grade II	10	Blank(s)	Blank(s)	T2	Blank(s)	Blank(s)	N0	Blank(s)	Blank(s)	Blank(s)	Blank(s)	Blank(s)	Blank(s)	Blank(s)	Blank(s)	Blank(s)	Blank(s)	14	0	Blank(s)	No radiation and/or cancer-directed surgery	None	Alive or dead of other cause	Dead (attributable to causes other than this cancer dx)	28	Chronic Liver Disease and Cirrhosis	One primary only	August	No/Unknown
1793304	1988	Female	56	White	Unknown	Splenic Flexure	8140/3: Adenocarcinoma, NOS	C18.5-Splenic flexure of colon	Moderately differentiated; Grade II	10	Blank(s)	Blank(s)	T2	Blank(s)	Blank(s)	N0	Blank(s)	Blank(s)	Blank(s)	Blank(s)	Blank(s)	Blank(s)	Blank(s)	Blank(s)	Blank(s)	Blank(s)	8	0	Blank(s)	No radiation and/or cancer-directed surgery	None	Alive or dead of other cause	Alive or dead due to cancer	250	Alive	One primary only	July	No/Unknown
1793698	1988	Female	57	White	Widowed	Hepatic Flexure	8140/3: Adenocarcinoma, NOS	C18.3-Hepatic flexure of colon	Moderately differentiated; Grade II	20	Blank(s)	Blank(s)	T3	Blank(s)	Blank(s)	N0	Blank(s)	Blank(s)	Blank(s)	Blank(s)	Blank(s)	Blank(s)	Blank(s)	Blank(s)	Blank(s)	Blank(s)	10	0	Blank(s)	No radiation and/or cancer-directed surgery	None	Alive or dead of other cause	Alive or dead due to cancer	305	Alive	One primary only	July	No/Unknown
1793961	1988	Male	77	White	Single (never married)	Ascending Colon	8140/3: Adenocarcinoma, NOS	C18.2-Ascending colon	Moderately differentiated; Grade II	20	Blank(s)	Blank(s)	T3	Blank(s)	Blank(s)	N0	Blank(s)	Blank(s)	Blank(s)	Blank(s)	Blank(s)	Blank(s)	Blank(s)	Blank(s)	Blank(s)	Blank(s)	98	0	Blank(s)	No radiation and/or cancer-directed surgery	None	Alive or dead of other cause	Dead (attributable to causes other than this cancer dx)	72	Diseases of Heart	One primary only	May	No/Unknown
1796342	1988	Female	57	White	Married (including common law)	Descending Colon	8481/3: Mucin-producing adenocarcinoma	C18.6-Descending colon	Moderately differentiated; Grade II	20	Blank(s)	Blank(s)	T3	Blank(s)	Blank(s)	N0	Blank(s)	Blank(s)	Blank(s)	Blank(s)	Blank(s)	Blank(s)	Blank(s)	Blank(s)	Blank(s)	Blank(s)	10	0	Blank(s)	No radiation and/or cancer-directed surgery	None	Alive or dead of other cause	Alive or dead due to cancer	306	Alive	One primary only	June	No/Unknown
1797878	1988	Female	74	White	Married (including common law)	Rectum	8140/3: Adenocarcinoma, NOS	C20.9-Rectum, NOS	Moderately differentiated; Grade II	10	Blank(s)	Blank(s)	T2	Blank(s)	Blank(s)	N0	Blank(s)	Blank(s)	Blank(s)	Blank(s)	Blank(s)	Blank(s)	Blank(s)	Blank(s)	Blank(s)	Blank(s)	8	0	Blank(s)	No radiation and/or cancer-directed surgery	None	Alive or dead of other cause	Dead (attributable to causes other than this cancer dx)	15	Pneumonia and Influenza	One primary only	July	No/Unknown
1798702	1988	Male	72	White	Married (including common law)	Rectosigmoid Junction	8140/3: Adenocarcinoma, NOS	C19.9-Rectosigmoid junction	Moderately differentiated; Grade II	10	Blank(s)	Blank(s)	T2	Blank(s)	Blank(s)	N0	Blank(s)	Blank(s)	Blank(s)	Blank(s)	Blank(s)	Blank(s)	Blank(s)	Blank(s)	Blank(s)	Blank(s)	9	0	Blank(s)	No radiation and/or cancer-directed surgery	None	Alive or dead of other cause	Dead (attributable to causes other than this cancer dx)	196	Other Cause of Death	One primary only	March	No/Unknown
1799378	1988	Female	52	White	Married (including common law)	Sigmoid Colon	8140/3: Adenocarcinoma, NOS	C18.7-Sigmoid colon	Moderately differentiated; Grade II	10	Blank(s)	Blank(s)	T1	Blank(s)	Blank(s)	N0	Blank(s)	Blank(s)	Blank(s)	Blank(s)	Blank(s)	Blank(s)	Blank(s)	Blank(s)	Blank(s)	Blank(s)	0	98	Blank(s)	No radiation and/or cancer-directed surgery	None	Alive or dead of other cause	Alive or dead due to cancer	307	Alive	One primary only	May	No/Unknown
1799881	1988	Male	68	White	Married (including common law)	Splenic Flexure	8140/3: Adenocarcinoma, NOS	C18.5-Splenic flexure of colon	Moderately differentiated; Grade II	20	Blank(s)	Blank(s)	T3	Blank(s)	Blank(s)	N0	Blank(s)	Blank(s)	Blank(s)	Blank(s)	Blank(s)	Blank(s)	Blank(s)	Blank(s)	Blank(s)	Blank(s)	8	0	Blank(s)	No radiation and/or cancer-directed surgery	None	Alive or dead of other cause	Dead (attributable to causes other than this cancer dx)	129	Other Cause of Death	One primary only	June	No/Unknown
1800602	1988	Male	63	White	Married (including common law)	Rectum	8480/3: Mucinous adenocarcinoma	C20.9-Rectum, NOS	Moderately differentiated; Grade II	20	Blank(s)	Blank(s)	T3	Blank(s)	Blank(s)	N0	Blank(s)	Blank(s)	Blank(s)	Blank(s)	Blank(s)	Blank(s)	Blank(s)	Blank(s)	Blank(s)	Blank(s)	1	0	Blank(s)	No radiation and/or cancer-directed surgery	None	Dead (attributable to this cancer dx)	Alive or dead due to cancer	155	Colon excluding Rectum	One primary only	January	No/Unknown
1800650	1988	Male	50	White	Married (including common law)	Rectum	8140/3: Adenocarcinoma, NOS	C20.9-Rectum, NOS	Moderately differentiated; Grade II	10	Blank(s)	Blank(s)	T2	Blank(s)	Blank(s)	N0	Blank(s)	Blank(s)	Blank(s)	Blank(s)	Blank(s)	Blank(s)	Blank(s)	Blank(s)	Blank(s)	Blank(s)	98	0	Blank(s)	Radiation prior to surgery	Beam radiation	Alive or dead of other cause	Alive or dead due to cancer	310	Alive	One primary only	February	No/Unknown
1801415	1988	Male	60	White	Divorced	Sigmoid Colon	8140/3: Adenocarcinoma, NOS	C18.7-Sigmoid colon	Well differentiated; Grade I	20	Blank(s)	Blank(s)	T4	Blank(s)	Blank(s)	N0	Blank(s)	Blank(s)	Blank(s)	Blank(s)	Blank(s)	Blank(s)	Blank(s)	Blank(s)	Blank(s)	Blank(s)	9	0	Blank(s)	No radiation and/or cancer-directed surgery	None	Alive or dead of other cause	Alive or dead due to cancer	302	Alive	One primary only	October	No/Unknown
1801923	1988	Male	69	White	Married (including common law)	Rectum	8140/3: Adenocarcinoma, NOS	C20.9-Rectum, NOS	Poorly differentiated; Grade III	20	Blank(s)	Blank(s)	T3	Blank(s)	Blank(s)	N0	Blank(s)	Blank(s)	Blank(s)	Blank(s)	Blank(s)	Blank(s)	Blank(s)	Blank(s)	Blank(s)	Blank(s)	0	98	Blank(s)	Radiation prior to surgery	Beam radiation	Alive or dead of other cause	Dead (attributable to causes other than this cancer dx)	21	Diseases of Heart	One primary only	August	No/Unknown
1802462	1988	Female	58	White	Married (including common law)	Splenic Flexure	8140/3: Adenocarcinoma, NOS	C18.5-Splenic flexure of colon	Moderately differentiated; Grade II	20	Blank(s)	Blank(s)	T3	Blank(s)	Blank(s)	N0	Blank(s)	Blank(s)	Blank(s)	Blank(s)	Blank(s)	Blank(s)	Blank(s)	Blank(s)	Blank(s)	Blank(s)	4	0	Blank(s)	No radiation and/or cancer-directed surgery	None	Alive or dead of other cause	Alive or dead due to cancer	305	Alive	One primary only	July	No/Unknown
1802533	1988	Male	60	Black	Unknown	Transverse Colon	8140/3: Adenocarcinoma, NOS	C18.4-Transverse colon	Moderately differentiated; Grade II	20	Blank(s)	Blank(s)	T3	Blank(s)	Blank(s)	N0	Blank(s)	Blank(s)	Blank(s)	Blank(s)	Blank(s)	Blank(s)	Blank(s)	Blank(s)	Blank(s)	Blank(s)	10	0	Blank(s)	No radiation and/or cancer-directed surgery	None	Alive or dead of other cause	Alive or dead due to cancer	305	Alive	One primary only	July	No/Unknown
1804473	1988	Male	72	White	Married (including common law)	Ascending Colon	8140/3: Adenocarcinoma, NOS	C18.2-Ascending colon	Moderately differentiated; Grade II	20	Blank(s)	Blank(s)	T3	Blank(s)	Blank(s)	N0	Blank(s)	Blank(s)	Blank(s)	Blank(s)	Blank(s)	Blank(s)	Blank(s)	Blank(s)	Blank(s)	Blank(s)	8	0	Blank(s)	No radiation and/or cancer-directed surgery	None	Dead (attributable to this cancer dx)	Alive or dead due to cancer	50	Colon excluding Rectum	One primary only	April	No/Unknown
1804700	1988	Male	69	White	Married (including common law)	Splenic Flexure	8140/3: Adenocarcinoma, NOS	C18.5-Splenic flexure of colon	Moderately differentiated; Grade II	20	Blank(s)	Blank(s)	T3	Blank(s)	Blank(s)	N0	Blank(s)	Blank(s)	Blank(s)	Blank(s)	Blank(s)	Blank(s)	Blank(s)	Blank(s)	Blank(s)	Blank(s)	7	0	Blank(s)	No radiation and/or cancer-directed surgery	None	Dead (attributable to this cancer dx)	Alive or dead due to cancer	134	Kidney and Renal Pelvis	One primary only	July	No/Unknown
1805699	1988	Male	37	White	Single (never married)	Splenic Flexure	8481/3: Mucin-producing adenocarcinoma	C18.5-Splenic flexure of colon	Poorly differentiated; Grade III	20	Blank(s)	Blank(s)	T4	Blank(s)	Blank(s)	N0	Blank(s)	Blank(s)	Blank(s)	Blank(s)	Blank(s)	Blank(s)	Blank(s)	Blank(s)	Blank(s)	Blank(s)	0	98	Blank(s)	No radiation and/or cancer-directed surgery	None	Dead (attributable to this cancer dx)	Alive or dead due to cancer	9	Colon excluding Rectum	One primary only	November	Yes
1806704	1988	Male	71	White	Married (including common law)	Sigmoid Colon	8140/3: Adenocarcinoma, NOS	C18.7-Sigmoid colon	Moderately differentiated; Grade II	30	Blank(s)	Blank(s)	T3	Blank(s)	Blank(s)	N1	Blank(s)	Blank(s)	Blank(s)	Blank(s)	Blank(s)	Blank(s)	Blank(s)	Blank(s)	Blank(s)	Blank(s)	9	3	Blank(s)	Radiation after surgery	Beam radiation	Dead (attributable to this cancer dx)	Alive or dead due to cancer	29	Colon excluding Rectum	One primary only	January	Yes
1807813	1988	Male	70	White	Married (including common law)	Rectum	8140/3: Adenocarcinoma, NOS	C20.9-Rectum, NOS	Moderately differentiated; Grade II	10	Blank(s)	Blank(s)	T2	Blank(s)	Blank(s)	N0	Blank(s)	Blank(s)	Blank(s)	Blank(s)	Blank(s)	Blank(s)	Blank(s)	Blank(s)	Blank(s)	Blank(s)	13	0	Blank(s)	No radiation and/or cancer-directed surgery	None	Alive or dead of other cause	Dead (attributable to causes other than this cancer dx)	168	Chronic Obstructive Pulmonary Disease and Allied Cond	One primary only	August	No/Unknown
1808931	1988	Female	47	White	Divorced	Sigmoid Colon	8140/3: Adenocarcinoma, NOS	C18.7-Sigmoid colon	Moderately differentiated; Grade II	20	Blank(s)	Blank(s)	T3	Blank(s)	Blank(s)	N0	Blank(s)	Blank(s)	Blank(s)	Blank(s)	Blank(s)	Blank(s)	Blank(s)	Blank(s)	Blank(s)	Blank(s)	14	0	Blank(s)	No radiation and/or cancer-directed surgery	None	Alive or dead of other cause	Alive or dead due to cancer	303	Alive	One primary only	September	Yes
1808998	1988	Female	74	White	Married (including common law)	Sigmoid Colon	8140/3: Adenocarcinoma, NOS	C18.7-Sigmoid colon	Moderately differentiated; Grade II	20	Blank(s)	Blank(s)	T4	Blank(s)	Blank(s)	N0	Blank(s)	Blank(s)	Blank(s)	Blank(s)	Blank(s)	Blank(s)	Blank(s)	Blank(s)	Blank(s)	Blank(s)	8	0	Blank(s)	No radiation and/or cancer-directed surgery	None	Dead (attributable to this cancer dx)	Alive or dead due to cancer	11	Colon excluding Rectum	One primary only	February	No/Unknown
1809012	1988	Female	67	White	Widowed	Sigmoid Colon	8481/3: Mucin-producing adenocarcinoma	C18.7-Sigmoid colon	Moderately differentiated; Grade II	30	Blank(s)	Blank(s)	T3	Blank(s)	Blank(s)	N1	Blank(s)	Blank(s)	Blank(s)	Blank(s)	Blank(s)	Blank(s)	Blank(s)	Blank(s)	Blank(s)	Blank(s)	9	2	Blank(s)	No radiation and/or cancer-directed surgery	None	Alive or dead of other cause	Dead (attributable to causes other than this cancer dx)	138	Cerebrovascular Diseases	One primary only	May	Yes
1809398	1988	Female	37	White	Married (including common law)	Cecum	8481/3: Mucin-producing adenocarcinoma	C18.0-Cecum	Poorly differentiated; Grade III	20	Blank(s)	Blank(s)	T4	Blank(s)	Blank(s)	N0	Blank(s)	Blank(s)	Blank(s)	Blank(s)	Blank(s)	Blank(s)	Blank(s)	Blank(s)	Blank(s)	Blank(s)	20	0	Blank(s)	No radiation and/or cancer-directed surgery	None	Alive or dead of other cause	Alive or dead due to cancer	304	Alive	One primary only	August	No/Unknown
1811174	1988	Male	70	Black	Married (including common law)	Ascending Colon	8140/3: Adenocarcinoma, NOS	C18.2-Ascending colon	Moderately differentiated; Grade II	10	Blank(s)	Blank(s)	T2	Blank(s)	Blank(s)	N0	Blank(s)	Blank(s)	Blank(s)	Blank(s)	Blank(s)	Blank(s)	Blank(s)	Blank(s)	Blank(s)	Blank(s)	25	0	Blank(s)	No radiation and/or cancer-directed surgery	None	Alive or dead of other cause	Dead (attributable to causes other than this cancer dx)	159	Diseases of Heart	One primary only	February	No/Unknown
1812780	1988	Male	74	White	Divorced	Rectum	8140/3: Adenocarcinoma, NOS	C20.9-Rectum, NOS	Moderately differentiated; Grade II	20	Blank(s)	Blank(s)	T3	Blank(s)	Blank(s)	N0	Blank(s)	Blank(s)	Blank(s)	Blank(s)	Blank(s)	Blank(s)	Blank(s)	Blank(s)	Blank(s)	Blank(s)	9	0	Blank(s)	No radiation and/or cancer-directed surgery	None	Dead (attributable to this cancer dx)	Alive or dead due to cancer	41	Colon excluding Rectum	One primary only	June	No/Unknown
1814134	1988	Female	67	Asian or Pacific Islander	Single (never married)	Sigmoid Colon	8140/3: Adenocarcinoma, NOS	C18.7-Sigmoid colon	Moderately differentiated; Grade II	20	Blank(s)	Blank(s)	T3	Blank(s)	Blank(s)	N0	Blank(s)	Blank(s)	Blank(s)	Blank(s)	Blank(s)	Blank(s)	Blank(s)	Blank(s)	Blank(s)	Blank(s)	8	0	Blank(s)	No radiation and/or cancer-directed surgery	None	Alive or dead of other cause	Dead (attributable to causes other than this cancer dx)	171	Cerebrovascular Diseases	One primary only	October	No/Unknown
1814566	1988	Male	39	White	Married (including common law)	Sigmoid Colon	8140/3: Adenocarcinoma, NOS	C18.7-Sigmoid colon	Moderately differentiated; Grade II	20	Blank(s)	Blank(s)	T3	Blank(s)	Blank(s)	N0	Blank(s)	Blank(s)	Blank(s)	Blank(s)	Blank(s)	Blank(s)	Blank(s)	Blank(s)	Blank(s)	Blank(s)	6	0	Blank(s)	Radiation after surgery	Beam radiation	Alive or dead of other cause	Alive or dead due to cancer	304	Alive	One primary only	August	Yes
1815221	1988	Female	71	Asian or Pacific Islander	Married (including common law)	Sigmoid Colon	8140/3: Adenocarcinoma, NOS	C18.7-Sigmoid colon	Moderately differentiated; Grade II	20	Blank(s)	Blank(s)	T3	Blank(s)	Blank(s)	N0	Blank(s)	Blank(s)	Blank(s)	Blank(s)	Blank(s)	Blank(s)	Blank(s)	Blank(s)	Blank(s)	Blank(s)	12	0	Blank(s)	No radiation and/or cancer-directed surgery	None	Alive or dead of other cause	Dead (attributable to causes other than this cancer dx)	94	Cerebrovascular Diseases	One primary only	October	No/Unknown
1815468	1988	Female	75	Black	Married (including common law)	Ascending Colon	8140/3: Adenocarcinoma, NOS	C18.2-Ascending colon	Moderately differentiated; Grade II	30	Blank(s)	Blank(s)	T3	Blank(s)	Blank(s)	N1	Blank(s)	Blank(s)	Blank(s)	Blank(s)	Blank(s)	Blank(s)	Blank(s)	Blank(s)	Blank(s)	Blank(s)	7	1	Blank(s)	No radiation and/or cancer-directed surgery	None	Dead (attributable to this cancer dx)	Alive or dead due to cancer	12	Colon excluding Rectum	One primary only	August	No/Unknown
1815767	1988	Male	61	White	Married (including common law)	Rectosigmoid Junction	8140/3: Adenocarcinoma, NOS	C19.9-Rectosigmoid junction	Well differentiated; Grade I	30	Blank(s)	Blank(s)	T3	Blank(s)	Blank(s)	N1	Blank(s)	Blank(s)	Blank(s)	Blank(s)	Blank(s)	Blank(s)	Blank(s)	Blank(s)	Blank(s)	Blank(s)	8	2	Blank(s)	Radiation prior to surgery	Beam radiation	Alive or dead of other cause	Dead (attributable to causes other than this cancer dx)	186	Septicemia	One primary only	September	No/Unknown
1816118	1988	Female	38	White	Married (including common law)	Ascending Colon	8140/3: Adenocarcinoma, NOS	C18.2-Ascending colon	Poorly differentiated; Grade III	20	Blank(s)	Blank(s)	T3	Blank(s)	Blank(s)	N0	Blank(s)	Blank(s)	Blank(s)	Blank(s)	Blank(s)	Blank(s)	Blank(s)	Blank(s)	Blank(s)	Blank(s)	10	0	Blank(s)	No radiation and/or cancer-directed surgery	None	Alive or dead of other cause	Alive or dead due to cancer	305	Alive	One primary only	July	Yes
1817966	1988	Female	79	White	Widowed	Rectum	8140/3: Adenocarcinoma, NOS	C20.9-Rectum, NOS	Moderately differentiated; Grade II	20	Blank(s)	Blank(s)	T3	Blank(s)	Blank(s)	N0	Blank(s)	Blank(s)	Blank(s)	Blank(s)	Blank(s)	Blank(s)	Blank(s)	Blank(s)	Blank(s)	Blank(s)	5	0	Blank(s)	Radiation prior to surgery	Beam radiation	Alive or dead of other cause	Dead (attributable to causes other than this cancer dx)	240	Diseases of Heart	One primary only	June	No/Unknown
1818867	1988	Male	58	White	Married (including common law)	Rectosigmoid Junction	8140/3: Adenocarcinoma, NOS	C19.9-Rectosigmoid junction	Moderately differentiated; Grade II	10	Blank(s)	Blank(s)	T2	Blank(s)	Blank(s)	N0	Blank(s)	Blank(s)	Blank(s)	Blank(s)	Blank(s)	Blank(s)	Blank(s)	Blank(s)	Blank(s)	Blank(s)	6	0	Blank(s)	No radiation and/or cancer-directed surgery	None	Alive or dead of other cause	Dead (attributable to causes other than this cancer dx)	252	Diseases of Heart	One primary only	August	No/Unknown
1819486	1988	Male	65	White	Married (including common law)	Sigmoid Colon	8140/3: Adenocarcinoma, NOS	C18.7-Sigmoid colon	Moderately differentiated; Grade II	10	Blank(s)	Blank(s)	T2	Blank(s)	Blank(s)	N0	Blank(s)	Blank(s)	Blank(s)	Blank(s)	Blank(s)	Blank(s)	Blank(s)	Blank(s)	Blank(s)	Blank(s)	4	0	Blank(s)	No radiation and/or cancer-directed surgery	None	Alive or dead of other cause	Dead (attributable to causes other than this cancer dx)	210	Diseases of Heart	One primary only	June	No/Unknown
1820166	1988	Male	76	White	Married (including common law)	Transverse Colon	8140/3: Adenocarcinoma, NOS	C18.4-Transverse colon	Poorly differentiated; Grade III	30	Blank(s)	Blank(s)	T3	Blank(s)	Blank(s)	N1	Blank(s)	Blank(s)	Blank(s)	Blank(s)	Blank(s)	Blank(s)	Blank(s)	Blank(s)	Blank(s)	Blank(s)	9	2	Blank(s)	No radiation and/or cancer-directed surgery	None	Dead (attributable to this cancer dx)	Alive or dead due to cancer	60	Colon excluding Rectum	One primary only	August	No/Unknown
1820293	1988	Female	79	White	Widowed	Transverse Colon	8140/3: Adenocarcinoma, NOS	C18.4-Transverse colon	Moderately differentiated; Grade II	20	Blank(s)	Blank(s)	T3	Blank(s)	Blank(s)	N0	Blank(s)	Blank(s)	Blank(s)	Blank(s)	Blank(s)	Blank(s)	Blank(s)	Blank(s)	Blank(s)	Blank(s)	98	0	Blank(s)	No radiation and/or cancer-directed surgery	None	Alive or dead of other cause	Dead (attributable to causes other than this cancer dx)	60	Other Infectious and Parasitic Diseases including HIV	One primary only	March	No/Unknown
1820397	1988	Female	58	White	Married (including common law)	Sigmoid Colon	8140/3: Adenocarcinoma, NOS	C18.7-Sigmoid colon	Moderately differentiated; Grade II	10	Blank(s)	Blank(s)	T1	Blank(s)	Blank(s)	N0	Blank(s)	Blank(s)	Blank(s)	Blank(s)	Blank(s)	Blank(s)	Blank(s)	Blank(s)	Blank(s)	Blank(s)	0	98	Blank(s)	No radiation and/or cancer-directed surgery	None	Dead (attributable to this cancer dx)	Alive or dead due to cancer	47	Colon excluding Rectum	One primary only	June	No/Unknown
1820422	1988	Male	56	White	Married (including common law)	Ascending Colon	8140/3: Adenocarcinoma, NOS	C18.2-Ascending colon	Moderately differentiated; Grade II	20	Blank(s)	Blank(s)	T3	Blank(s)	Blank(s)	N0	Blank(s)	Blank(s)	Blank(s)	Blank(s)	Blank(s)	Blank(s)	Blank(s)	Blank(s)	Blank(s)	Blank(s)	98	0	Blank(s)	No radiation and/or cancer-directed surgery	None	Dead (attributable to this cancer dx)	Alive or dead due to cancer	21	Colon excluding Rectum	One primary only	February	No/Unknown
1820862	1988	Male	80	White	Married (including common law)	Hepatic Flexure	8140/3: Adenocarcinoma, NOS	C18.3-Hepatic flexure of colon	Well differentiated; Grade I	30	Blank(s)	Blank(s)	T3	Blank(s)	Blank(s)	N1	Blank(s)	Blank(s)	Blank(s)	Blank(s)	Blank(s)	Blank(s)	Blank(s)	Blank(s)	Blank(s)	Blank(s)	16	3	Blank(s)	No radiation and/or cancer-directed surgery	None	Dead (attributable to this cancer dx)	Alive or dead due to cancer	98	Colon excluding Rectum	One primary only	January	No/Unknown
1821070	1988	Female	69	White	Widowed	Ascending Colon	8140/3: Adenocarcinoma, NOS	C18.2-Ascending colon	Moderately differentiated; Grade II	20	Blank(s)	Blank(s)	T3	Blank(s)	Blank(s)	N0	Blank(s)	Blank(s)	Blank(s)	Blank(s)	Blank(s)	Blank(s)	Blank(s)	Blank(s)	Blank(s)	Blank(s)	14	0	Blank(s)	No radiation and/or cancer-directed surgery	None	Alive or dead of other cause	Dead (attributable to causes other than this cancer dx)	152	Cerebrovascular Diseases	One primary only	September	No/Unknown
1821600	1988	Female	80	White	Single (never married)	Sigmoid Colon	8140/3: Adenocarcinoma, NOS	C18.7-Sigmoid colon	Moderately differentiated; Grade II	20	Blank(s)	Blank(s)	T3	Blank(s)	Blank(s)	N0	Blank(s)	Blank(s)	Blank(s)	Blank(s)	Blank(s)	Blank(s)	Blank(s)	Blank(s)	Blank(s)	Blank(s)	16	0	Blank(s)	No radiation and/or cancer-directed surgery	None	Alive or dead of other cause	Dead (attributable to causes other than this cancer dx)	27	Diseases of Heart	One primary only	October	No/Unknown
1826814	1988	Female	48	Black	Divorced	Ascending Colon	8481/3: Mucin-producing adenocarcinoma	C18.2-Ascending colon	Moderately differentiated; Grade II	30	Blank(s)	Blank(s)	T3	Blank(s)	Blank(s)	N1	Blank(s)	Blank(s)	Blank(s)	Blank(s)	Blank(s)	Blank(s)	Blank(s)	Blank(s)	Blank(s)	Blank(s)	3	1	Blank(s)	No radiation and/or cancer-directed surgery	None	Alive or dead of other cause	Dead (attributable to causes other than this cancer dx)	8	State DC not available or state DC available but no COD	One primary only	August	Yes
1826854	1988	Female	72	White	Married (including common law)	Transverse Colon	8140/3: Adenocarcinoma, NOS	C18.4-Transverse colon	Moderately differentiated; Grade II	20	Blank(s)	Blank(s)	T3	Blank(s)	Blank(s)	N0	Blank(s)	Blank(s)	Blank(s)	Blank(s)	Blank(s)	Blank(s)	Blank(s)	Blank(s)	Blank(s)	Blank(s)	5	0	Blank(s)	No radiation and/or cancer-directed surgery	None	Alive or dead of other cause	Dead (attributable to causes other than this cancer dx)	206	Other Cause of Death	One primary only	September	No/Unknown
1826860	1988	Female	64	White	Widowed	Descending Colon	8481/3: Mucin-producing adenocarcinoma	C18.6-Descending colon	Poorly differentiated; Grade III	20	Blank(s)	Blank(s)	T3	Blank(s)	Blank(s)	N0	Blank(s)	Blank(s)	Blank(s)	Blank(s)	Blank(s)	Blank(s)	Blank(s)	Blank(s)	Blank(s)	Blank(s)	20	0	Blank(s)	Radiation after surgery	Beam radiation	Alive or dead of other cause	Dead (attributable to causes other than this cancer dx)	302	Diseases of Heart	One primary only	January	Yes
1826867	1988	Female	74	White	Single (never married)	Rectum	8140/3: Adenocarcinoma, NOS	C20.9-Rectum, NOS	Poorly differentiated; Grade III	20	Blank(s)	Blank(s)	T3	Blank(s)	Blank(s)	N0	Blank(s)	Blank(s)	Blank(s)	Blank(s)	Blank(s)	Blank(s)	Blank(s)	Blank(s)	Blank(s)	Blank(s)	9	0	Blank(s)	Radiation before and after surgery	Beam radiation	Alive or dead of other cause	Dead (attributable to causes other than this cancer dx)	58	State DC not available or state DC available but no COD	One primary only	January	No/Unknown
1826883	1988	Male	72	White	Married (including common law)	Sigmoid Colon	8140/3: Adenocarcinoma, NOS	C18.7-Sigmoid colon	Poorly differentiated; Grade III	20	Blank(s)	Blank(s)	T3	Blank(s)	Blank(s)	N0	Blank(s)	Blank(s)	Blank(s)	Blank(s)	Blank(s)	Blank(s)	Blank(s)	Blank(s)	Blank(s)	Blank(s)	7	0	Blank(s)	No radiation and/or cancer-directed surgery	None	Alive or dead of other cause	Dead (attributable to causes other than this cancer dx)	211	Cerebrovascular Diseases	One primary only	January	No/Unknown
1826985	1988	Male	56	Black	Unknown	Transverse Colon	8140/3: Adenocarcinoma, NOS	C18.4-Transverse colon	Moderately differentiated; Grade II	20	Blank(s)	Blank(s)	T3	Blank(s)	Blank(s)	N0	Blank(s)	Blank(s)	Blank(s)	Blank(s)	Blank(s)	Blank(s)	Blank(s)	Blank(s)	Blank(s)	Blank(s)	5	0	Blank(s)	No radiation and/or cancer-directed surgery	None	Alive or dead of other cause	Alive or dead due to cancer	211	Alive	One primary only	October	No/Unknown
1827246	1988	Female	72	White	Married (including common law)	Rectum	8140/3: Adenocarcinoma, NOS	C20.9-Rectum, NOS	Moderately differentiated; Grade II	10	Blank(s)	Blank(s)	T2	Blank(s)	Blank(s)	N0	Blank(s)	Blank(s)	Blank(s)	Blank(s)	Blank(s)	Blank(s)	Blank(s)	Blank(s)	Blank(s)	Blank(s)	2	0	Blank(s)	Radiation prior to surgery	Beam radiation	Alive or dead of other cause	Dead (attributable to causes other than this cancer dx)	91	Alzheimers (ICD-9 and 10 only)	One primary only	August	No/Unknown
1827331	1989	Male	38	Asian or Pacific Islander	Married (including common law)	Rectum	8140/3: Adenocarcinoma, NOS	C20.9-Rectum, NOS	Moderately differentiated; Grade II	20	Blank(s)	Blank(s)	T3	Blank(s)	Blank(s)	N0	Blank(s)	Blank(s)	Blank(s)	Blank(s)	Blank(s)	Blank(s)	Blank(s)	Blank(s)	Blank(s)	Blank(s)	98	0	Blank(s)	Radiation prior to surgery	Beam radiation	Dead (attributable to this cancer dx)	Alive or dead due to cancer	39	Rectum and Rectosigmoid Junction	One primary only	February	No/Unknown
1827371	1988	Male	71	White	Married (including common law)	Rectum	8140/3: Adenocarcinoma, NOS	C20.9-Rectum, NOS	Moderately differentiated; Grade II	10	Blank(s)	Blank(s)	T1	Blank(s)	Blank(s)	N0	Blank(s)	Blank(s)	Blank(s)	Blank(s)	Blank(s)	Blank(s)	Blank(s)	Blank(s)	Blank(s)	Blank(s)	1	0	Blank(s)	Radiation prior to surgery	Beam radiation	Alive or dead of other cause	Dead (attributable to causes other than this cancer dx)	210	Diseases of Heart	One primary only	October	No/Unknown
1827417	1989	Male	40	Black	Married (including common law)	Hepatic Flexure	8140/3: Adenocarcinoma, NOS	C18.3-Hepatic flexure of colon	Moderately differentiated; Grade II	20	Blank(s)	Blank(s)	T3	Blank(s)	Blank(s)	N0	Blank(s)	Blank(s)	Blank(s)	Blank(s)	Blank(s)	Blank(s)	Blank(s)	Blank(s)	Blank(s)	Blank(s)	59	0	Blank(s)	No radiation and/or cancer-directed surgery	None	Alive or dead of other cause	Alive or dead due to cancer	297	Alive	One primary only	March	No/Unknown
1827506	1988	Female	78	White	Widowed	Cecum	8480/3: Mucinous adenocarcinoma	C18.0-Cecum	Moderately differentiated; Grade II	20	Blank(s)	Blank(s)	T3	Blank(s)	Blank(s)	N0	Blank(s)	Blank(s)	Blank(s)	Blank(s)	Blank(s)	Blank(s)	Blank(s)	Blank(s)	Blank(s)	Blank(s)	9	0	Blank(s)	No radiation and/or cancer-directed surgery	None	Dead (attributable to this cancer dx)	Alive or dead due to cancer	238	Colon excluding Rectum	One primary only	June	No/Unknown
1827550	1988	Male	77	Black	Married (including common law)	Ascending Colon	8140/3: Adenocarcinoma, NOS	C18.2-Ascending colon	Moderately differentiated; Grade II	20	Blank(s)	Blank(s)	T3	Blank(s)	Blank(s)	N0	Blank(s)	Blank(s)	Blank(s)	Blank(s)	Blank(s)	Blank(s)	Blank(s)	Blank(s)	Blank(s)	Blank(s)	4	0	Blank(s)	No radiation and/or cancer-directed surgery	None	Alive or dead of other cause	Dead (attributable to causes other than this cancer dx)	79	Nephritis, Nephrotic Syndrome and Nephrosis	One primary only	August	No/Unknown
1827561	1988	Female	71	White	Divorced	Hepatic Flexure	8140/3: Adenocarcinoma, NOS	C18.3-Hepatic flexure of colon	Moderately differentiated; Grade II	10	Blank(s)	Blank(s)	T2	Blank(s)	Blank(s)	N0	Blank(s)	Blank(s)	Blank(s)	Blank(s)	Blank(s)	Blank(s)	Blank(s)	Blank(s)	Blank(s)	Blank(s)	6	0	Blank(s)	No radiation and/or cancer-directed surgery	None	Alive or dead of other cause	Alive or dead due to cancer	306	Alive	One primary only	June	No/Unknown
1827750	1988	Female	65	White	Married (including common law)	Rectum	8140/3: Adenocarcinoma, NOS	C20.9-Rectum, NOS	Poorly differentiated; Grade III	20	Blank(s)	Blank(s)	T3	Blank(s)	Blank(s)	N0	Blank(s)	Blank(s)	Blank(s)	Blank(s)	Blank(s)	Blank(s)	Blank(s)	Blank(s)	Blank(s)	Blank(s)	1	0	Blank(s)	No radiation and/or cancer-directed surgery	None	Alive or dead of other cause	Dead (attributable to causes other than this cancer dx)	202	State DC not available or state DC available but no COD	One primary only	October	No/Unknown
1827934	1989	Female	68	White	Widowed	Rectosigmoid Junction	8140/3: Adenocarcinoma, NOS	C19.9-Rectosigmoid junction	Well differentiated; Grade I	30	Blank(s)	Blank(s)	T3	Blank(s)	Blank(s)	N1	Blank(s)	Blank(s)	Blank(s)	Blank(s)	Blank(s)	Blank(s)	Blank(s)	Blank(s)	Blank(s)	Blank(s)	9	2	Blank(s)	No radiation and/or cancer-directed surgery	None	Dead (attributable to this cancer dx)	Alive or dead due to cancer	46	Rectum and Rectosigmoid Junction	One primary only	September	No/Unknown
1828024	1989	Female	77	White	Widowed	Rectosigmoid Junction	8140/3: Adenocarcinoma, NOS	C19.9-Rectosigmoid junction	Moderately differentiated; Grade II	30	Blank(s)	Blank(s)	T3	Blank(s)	Blank(s)	N2	Blank(s)	Blank(s)	Blank(s)	Blank(s)	Blank(s)	Blank(s)	Blank(s)	Blank(s)	Blank(s)	Blank(s)	23	4	Blank(s)	No radiation and/or cancer-directed surgery	None	Dead (attributable to this cancer dx)	Alive or dead due to cancer	60	Rectum and Rectosigmoid Junction	One primary only	March	No/Unknown
1828109	1989	Female	78	White	Married (including common law)	Hepatic Flexure	8140/3: Adenocarcinoma, NOS	C18.3-Hepatic flexure of colon	Poorly differentiated; Grade III	20	Blank(s)	Blank(s)	T4	Blank(s)	Blank(s)	N0	Blank(s)	Blank(s)	Blank(s)	Blank(s)	Blank(s)	Blank(s)	Blank(s)	Blank(s)	Blank(s)	Blank(s)	98	0	Blank(s)	No radiation and/or cancer-directed surgery	Refused	Dead (attributable to this cancer dx)	Alive or dead due to cancer	10	Colon excluding Rectum	One primary only	May	No/Unknown
1828278	1989	Male	71	White	Married (including common law)	Sigmoid Colon	8140/3: Adenocarcinoma, NOS	C18.7-Sigmoid colon	Poorly differentiated; Grade III	10	Blank(s)	Blank(s)	T2	Blank(s)	Blank(s)	N0	Blank(s)	Blank(s)	Blank(s)	Blank(s)	Blank(s)	Blank(s)	Blank(s)	Blank(s)	Blank(s)	Blank(s)	3	0	Blank(s)	No radiation and/or cancer-directed surgery	None	Dead (attributable to this cancer dx)	Alive or dead due to cancer	8	Other Cause of Death	One primary only	May	No/Unknown
1828317	1991	Male	67	Black	Single (never married)	Hepatic Flexure	8140/3: Adenocarcinoma, NOS	C18.3-Hepatic flexure of colon	Moderately differentiated; Grade II	10	Blank(s)	Blank(s)	T2	Blank(s)	Blank(s)	N0	Blank(s)	Blank(s)	Blank(s)	Blank(s)	Blank(s)	Blank(s)	Blank(s)	Blank(s)	Blank(s)	Blank(s)	10	0	Blank(s)	No radiation and/or cancer-directed surgery	None	Alive or dead of other cause	Dead (attributable to causes other than this cancer dx)	268	Diseases of Heart	One primary only	April	No/Unknown
1828397	1989	Male	58	White	Married (including common law)	Sigmoid Colon	8480/3: Mucinous adenocarcinoma	C18.7-Sigmoid colon	Moderately differentiated; Grade II	20	Blank(s)	Blank(s)	T3	Blank(s)	Blank(s)	N0	Blank(s)	Blank(s)	Blank(s)	Blank(s)	Blank(s)	Blank(s)	Blank(s)	Blank(s)	Blank(s)	Blank(s)	2	0	Blank(s)	No radiation and/or cancer-directed surgery	None	Alive or dead of other cause	Dead (attributable to causes other than this cancer dx)	65	Diseases of Heart	One primary only	February	No/Unknown
1828450	1989	Male	68	White	Divorced	Rectum	8140/3: Adenocarcinoma, NOS	C20.9-Rectum, NOS	Moderately differentiated; Grade II	20	Blank(s)	Blank(s)	T3	Blank(s)	Blank(s)	N0	Blank(s)	Blank(s)	Blank(s)	Blank(s)	Blank(s)	Blank(s)	Blank(s)	Blank(s)	Blank(s)	Blank(s)	4	0	Blank(s)	Radiation after surgery	Beam radiation	Dead (attributable to this cancer dx)	Alive or dead due to cancer	31	Colon excluding Rectum	One primary only	October	No/Unknown
1828546	1989	Male	63	White	Married (including common law)	Rectum	8140/3: Adenocarcinoma, NOS	C20.9-Rectum, NOS	Moderately differentiated; Grade II	10	Blank(s)	Blank(s)	T2	Blank(s)	Blank(s)	N0	Blank(s)	Blank(s)	Blank(s)	Blank(s)	Blank(s)	Blank(s)	Blank(s)	Blank(s)	Blank(s)	Blank(s)	13	0	Blank(s)	No radiation and/or cancer-directed surgery	None	Alive or dead of other cause	Dead (attributable to causes other than this cancer dx)	55	State DC not available or state DC available but no COD	One primary only	March	No/Unknown
1828597	1991	Male	78	White	Married (including common law)	Sigmoid Colon	8140/3: Adenocarcinoma, NOS	C18.7-Sigmoid colon	Moderately differentiated; Grade II	30	Blank(s)	Blank(s)	T3	Blank(s)	Blank(s)	N1	Blank(s)	Blank(s)	Blank(s)	Blank(s)	Blank(s)	Blank(s)	Blank(s)	Blank(s)	Blank(s)	Blank(s)	3	1	Blank(s)	No radiation and/or cancer-directed surgery	None	Dead (attributable to this cancer dx)	Alive or dead due to cancer	2	Colon excluding Rectum	One primary only	February	No/Unknown
1828665	1991	Female	71	Black	Married (including common law)	Transverse Colon	8140/3: Adenocarcinoma, NOS	C18.4-Transverse colon	Moderately differentiated; Grade II	20	Blank(s)	Blank(s)	T3	Blank(s)	Blank(s)	N0	Blank(s)	Blank(s)	Blank(s)	Blank(s)	Blank(s)	Blank(s)	Blank(s)	Blank(s)	Blank(s)	Blank(s)	15	0	Blank(s)	No radiation and/or cancer-directed surgery	None	Dead (attributable to this cancer dx)	Alive or dead due to cancer	23	Colon excluding Rectum	One primary only	April	No/Unknown
1828755	1988	Male	64	White	Unknown	Ascending Colon	8140/3: Adenocarcinoma, NOS	C18.2-Ascending colon	Moderately differentiated; Grade II	20	Blank(s)	Blank(s)	T3	Blank(s)	Blank(s)	N0	Blank(s)	Blank(s)	Blank(s)	Blank(s)	Blank(s)	Blank(s)	Blank(s)	Blank(s)	Blank(s)	Blank(s)	17	0	Blank(s)	No radiation and/or cancer-directed surgery	None	Alive or dead of other cause	Dead (attributable to causes other than this cancer dx)	239	Other Cause of Death	One primary only	June	No/Unknown
1828756	1991	Female	62	Black	Widowed	Sigmoid Colon	8480/3: Mucinous adenocarcinoma	C18.7-Sigmoid colon	Moderately differentiated; Grade II	30	Blank(s)	Blank(s)	T3	Blank(s)	Blank(s)	N1	Blank(s)	Blank(s)	Blank(s)	Blank(s)	Blank(s)	Blank(s)	Blank(s)	Blank(s)	Blank(s)	Blank(s)	9	3	Blank(s)	No radiation and/or cancer-directed surgery	None	Dead (attributable to this cancer dx)	Alive or dead due to cancer	71	Lung and Bronchus	One primary only	February	Yes
1828759	1988	Male	64	White	Unknown	Sigmoid Colon	8140/3: Adenocarcinoma, NOS	C18.7-Sigmoid colon	Moderately differentiated; Grade II	10	Blank(s)	Blank(s)	T1	Blank(s)	Blank(s)	N0	Blank(s)	Blank(s)	Blank(s)	Blank(s)	Blank(s)	Blank(s)	Blank(s)	Blank(s)	Blank(s)	Blank(s)	6	0	Blank(s)	No radiation and/or cancer-directed surgery	None	Dead (attributable to this cancer dx)	Alive or dead due to cancer	120	Colon excluding Rectum	One primary only	June	No/Unknown
1828874	1991	Male	58	White	Divorced	Sigmoid Colon	8140/3: Adenocarcinoma, NOS	C18.7-Sigmoid colon	Moderately differentiated; Grade II	20	Blank(s)	Blank(s)	T3	Blank(s)	Blank(s)	N0	Blank(s)	Blank(s)	Blank(s)	Blank(s)	Blank(s)	Blank(s)	Blank(s)	Blank(s)	Blank(s)	Blank(s)	15	0	Blank(s)	No radiation and/or cancer-directed surgery	None	Alive or dead of other cause	Alive or dead due to cancer	273	Alive	One primary only	March	No/Unknown
1828877	1989	Female	59	White	Married (including common law)	Sigmoid Colon	8481/3: Mucin-producing adenocarcinoma	C18.7-Sigmoid colon	Moderately differentiated; Grade II	20	Blank(s)	Blank(s)	T3	Blank(s)	Blank(s)	N0	Blank(s)	Blank(s)	Blank(s)	Blank(s)	Blank(s)	Blank(s)	Blank(s)	Blank(s)	Blank(s)	Blank(s)	9	0	Blank(s)	No radiation and/or cancer-directed surgery	None	Alive or dead of other cause	Alive or dead due to cancer	298	Alive	One primary only	February	Yes
1828918	1991	Female	69	Black	Married (including common law)	Ascending Colon	8140/3: Adenocarcinoma, NOS	C18.2-Ascending colon	Moderately differentiated; Grade II	30	Blank(s)	Blank(s)	T3	Blank(s)	Blank(s)	N2	Blank(s)	Blank(s)	Blank(s)	Blank(s)	Blank(s)	Blank(s)	Blank(s)	Blank(s)	Blank(s)	Blank(s)	18	13	Blank(s)	No radiation and/or cancer-directed surgery	None	Dead (attributable to this cancer dx)	Alive or dead due to cancer	7	Colon excluding Rectum	One primary only	March	Yes
1829030	1988	Female	69	Asian or Pacific Islander	Widowed	Ascending Colon	8481/3: Mucin-producing adenocarcinoma	C18.2-Ascending colon	Well differentiated; Grade I	20	Blank(s)	Blank(s)	T4	Blank(s)	Blank(s)	N0	Blank(s)	Blank(s)	Blank(s)	Blank(s)	Blank(s)	Blank(s)	Blank(s)	Blank(s)	Blank(s)	Blank(s)	24	0	Blank(s)	No radiation and/or cancer-directed surgery	None	Alive or dead of other cause	Alive or dead due to cancer	302	Alive	One primary only	October	No/Unknown
1829092	1990	Female	74	White	Widowed	Cecum	8140/3: Adenocarcinoma, NOS	C18.0-Cecum	Moderately differentiated; Grade II	10	Blank(s)	Blank(s)	T2	Blank(s)	Blank(s)	N0	Blank(s)	Blank(s)	Blank(s)	Blank(s)	Blank(s)	Blank(s)	Blank(s)	Blank(s)	Blank(s)	Blank(s)	1	0	Blank(s)	No radiation and/or cancer-directed surgery	None	Alive or dead of other cause	Dead (attributable to causes other than this cancer dx)	160	Pneumonia and Influenza	One primary only	August	No/Unknown
1829137	1991	Male	74	White	Married (including common law)	Sigmoid Colon	8140/3: Adenocarcinoma, NOS	C18.7-Sigmoid colon	Moderately differentiated; Grade II	20	Blank(s)	Blank(s)	T3	Blank(s)	Blank(s)	N0	Blank(s)	Blank(s)	Blank(s)	Blank(s)	Blank(s)	Blank(s)	Blank(s)	Blank(s)	Blank(s)	Blank(s)	23	0	Blank(s)	No radiation and/or cancer-directed surgery	None	Alive or dead of other cause	Dead (attributable to causes other than this cancer dx)	53	Diseases of Heart	One primary only	May	No/Unknown
1829159	1991	Female	76	White	Widowed	Sigmoid Colon	8140/3: Adenocarcinoma, NOS	C18.7-Sigmoid colon	Well differentiated; Grade I	20	Blank(s)	Blank(s)	T4	Blank(s)	Blank(s)	N0	Blank(s)	Blank(s)	Blank(s)	Blank(s)	Blank(s)	Blank(s)	Blank(s)	Blank(s)	Blank(s)	Blank(s)	98	0	Blank(s)	No radiation and/or cancer-directed surgery	None	Dead (attributable to this cancer dx)	Alive or dead due to cancer	5	Colon excluding Rectum	One primary only	January	Yes
1829451	1989	Male	58	White	Unknown	Cecum	8481/3: Mucin-producing adenocarcinoma	C18.0-Cecum	Moderately differentiated; Grade II	20	Blank(s)	Blank(s)	T3	Blank(s)	Blank(s)	N0	Blank(s)	Blank(s)	Blank(s)	Blank(s)	Blank(s)	Blank(s)	Blank(s)	Blank(s)	Blank(s)	Blank(s)	16	0	Blank(s)	No radiation and/or cancer-directed surgery	None	Dead (attributable to this cancer dx)	Alive or dead due to cancer	42	Lung and Bronchus	One primary only	May	No/Unknown
1829477	1988	Male	71	White	Married (including common law)	Rectosigmoid Junction	8140/3: Adenocarcinoma, NOS	C19.9-Rectosigmoid junction	Poorly differentiated; Grade III	20	Blank(s)	Blank(s)	T4	Blank(s)	Blank(s)	N0	Blank(s)	Blank(s)	Blank(s)	Blank(s)	Blank(s)	Blank(s)	Blank(s)	Blank(s)	Blank(s)	Blank(s)	19	0	Blank(s)	No radiation and/or cancer-directed surgery	None	Dead (attributable to this cancer dx)	Alive or dead due to cancer	100	Colon excluding Rectum	One primary only	November	No/Unknown
1829564	1988	Male	72	White	Married (including common law)	Rectum	8481/3: Mucin-producing adenocarcinoma	C20.9-Rectum, NOS	Well differentiated; Grade I	10	Blank(s)	Blank(s)	T1	Blank(s)	Blank(s)	N0	Blank(s)	Blank(s)	Blank(s)	Blank(s)	Blank(s)	Blank(s)	Blank(s)	Blank(s)	Blank(s)	Blank(s)	4	0	Blank(s)	No radiation and/or cancer-directed surgery	None	Dead (attributable to this cancer dx)	Alive or dead due to cancer	29	Rectum and Rectosigmoid Junction	One primary only	October	No/Unknown
1829578	1991	Female	66	Asian or Pacific Islander	Married (including common law)	Rectum	8140/3: Adenocarcinoma, NOS	C20.9-Rectum, NOS	Moderately differentiated; Grade II	30	Blank(s)	Blank(s)	T3	Blank(s)	Blank(s)	N2	Blank(s)	Blank(s)	Blank(s)	Blank(s)	Blank(s)	Blank(s)	Blank(s)	Blank(s)	Blank(s)	Blank(s)	10	8	Blank(s)	Radiation after surgery	Beam radiation	Dead (attributable to this cancer dx)	Alive or dead due to cancer	27	Rectum and Rectosigmoid Junction	One primary only	May	Yes
1829613	1990	Male	79	White	Married (including common law)	Ascending Colon	8481/3: Mucin-producing adenocarcinoma	C18.2-Ascending colon	Moderately differentiated; Grade II	10	Blank(s)	Blank(s)	T2	Blank(s)	Blank(s)	N0	Blank(s)	Blank(s)	Blank(s)	Blank(s)	Blank(s)	Blank(s)	Blank(s)	Blank(s)	Blank(s)	Blank(s)	9	0	Blank(s)	No radiation and/or cancer-directed surgery	None	Alive or dead of other cause	Dead (attributable to causes other than this cancer dx)	73	Diseases of Heart	One primary only	April	No/Unknown
1829730	1991	Female	78	White	Widowed	Cecum	8481/3: Mucin-producing adenocarcinoma	C18.0-Cecum	Moderately differentiated; Grade II	10	Blank(s)	Blank(s)	T2	Blank(s)	Blank(s)	N0	Blank(s)	Blank(s)	Blank(s)	Blank(s)	Blank(s)	Blank(s)	Blank(s)	Blank(s)	Blank(s)	Blank(s)	10	0	Blank(s)	No radiation and/or cancer-directed surgery	None	Alive or dead of other cause	Dead (attributable to causes other than this cancer dx)	186	Diseases of Heart	One primary only	April	No/Unknown
1829742	1990	Female	56	White	Married (including common law)	Rectum	8140/3: Adenocarcinoma, NOS	C20.9-Rectum, NOS	Moderately differentiated; Grade II	10	Blank(s)	Blank(s)	T2	Blank(s)	Blank(s)	N0	Blank(s)	Blank(s)	Blank(s)	Blank(s)	Blank(s)	Blank(s)	Blank(s)	Blank(s)	Blank(s)	Blank(s)	7	0	Blank(s)	No radiation and/or cancer-directed surgery	None	Alive or dead of other cause	Alive or dead due to cancer	287	Alive	One primary only	January	No/Unknown
1830057	1989	Female	53	White	Married (including common law)	Rectosigmoid Junction	8140/3: Adenocarcinoma, NOS	C19.9-Rectosigmoid junction	Poorly differentiated; Grade III	20	Blank(s)	Blank(s)	T3	Blank(s)	Blank(s)	N0	Blank(s)	Blank(s)	Blank(s)	Blank(s)	Blank(s)	Blank(s)	Blank(s)	Blank(s)	Blank(s)	Blank(s)	98	0	Blank(s)	No radiation and/or cancer-directed surgery	None	Alive or dead of other cause	Alive or dead due to cancer	289	Alive	One primary only	November	No/Unknown
1830145	1990	Male	80	White	Married (including common law)	Sigmoid Colon	8140/3: Adenocarcinoma, NOS	C18.7-Sigmoid colon	Moderately differentiated; Grade II	30	Blank(s)	Blank(s)	T3	Blank(s)	Blank(s)	N1	Blank(s)	Blank(s)	Blank(s)	Blank(s)	Blank(s)	Blank(s)	Blank(s)	Blank(s)	Blank(s)	Blank(s)	7	2	Blank(s)	No radiation and/or cancer-directed surgery	None	Dead (attributable to this cancer dx)	Alive or dead due to cancer	19	Colon excluding Rectum	One primary only	April	No/Unknown
1830248	1991	Male	71	Asian or Pacific Islander	Married (including common law)	Rectosigmoid Junction	8140/3: Adenocarcinoma, NOS	C19.9-Rectosigmoid junction	Moderately differentiated; Grade II	10	Blank(s)	Blank(s)	T2	Blank(s)	Blank(s)	N0	Blank(s)	Blank(s)	Blank(s)	Blank(s)	Blank(s)	Blank(s)	Blank(s)	Blank(s)	Blank(s)	Blank(s)	3	0	Blank(s)	No radiation and/or cancer-directed surgery	None	Alive or dead of other cause	Dead (attributable to causes other than this cancer dx)	183	Cerebrovascular Diseases	One primary only	April	No/Unknown
1830468	1991	Female	50	Asian or Pacific Islander	Married (including common law)	Descending Colon	8140/3: Adenocarcinoma, NOS	C18.6-Descending colon	Moderately differentiated; Grade II	20	Blank(s)	Blank(s)	T3	Blank(s)	Blank(s)	N0	Blank(s)	Blank(s)	Blank(s)	Blank(s)	Blank(s)	Blank(s)	Blank(s)	Blank(s)	Blank(s)	Blank(s)	14	0	Blank(s)	No radiation and/or cancer-directed surgery	None	Dead (attributable to this cancer dx)	Alive or dead due to cancer	41	Colon excluding Rectum	One primary only	February	No/Unknown
1830474	1989	Female	49	Black	Widowed	Ascending Colon	8140/3: Adenocarcinoma, NOS	C18.2-Ascending colon	Moderately differentiated; Grade II	20	Blank(s)	Blank(s)	T3	Blank(s)	Blank(s)	N0	Blank(s)	Blank(s)	Blank(s)	Blank(s)	Blank(s)	Blank(s)	Blank(s)	Blank(s)	Blank(s)	Blank(s)	27	0	Blank(s)	No radiation and/or cancer-directed surgery	None	Alive or dead of other cause	Alive or dead due to cancer	288	Alive	One primary only	December	No/Unknown
1830530	1990	Male	62	White	Single (never married)	Descending Colon	8140/3: Adenocarcinoma, NOS	C18.6-Descending colon	Moderately differentiated; Grade II	10	Blank(s)	Blank(s)	T1	Blank(s)	Blank(s)	N0	Blank(s)	Blank(s)	Blank(s)	Blank(s)	Blank(s)	Blank(s)	Blank(s)	Blank(s)	Blank(s)	Blank(s)	3	0	Blank(s)	No radiation and/or cancer-directed surgery	None	Alive or dead of other cause	Dead (attributable to causes other than this cancer dx)	261	Diseases of Heart	One primary only	June	No/Unknown
1830851	1990	Male	75	Asian or Pacific Islander	Married (including common law)	Cecum	8480/3: Mucinous adenocarcinoma	C18.0-Cecum	Moderately differentiated; Grade II	20	Blank(s)	Blank(s)	T3	Blank(s)	Blank(s)	N0	Blank(s)	Blank(s)	Blank(s)	Blank(s)	Blank(s)	Blank(s)	Blank(s)	Blank(s)	Blank(s)	Blank(s)	27	0	Blank(s)	No radiation and/or cancer-directed surgery	None	Alive or dead of other cause	Dead (attributable to causes other than this cancer dx)	76	Diseases of Heart	One primary only	August	No/Unknown
1831021	1988	Male	44	White	Married (including common law)	Rectum	8140/3: Adenocarcinoma, NOS	C20.9-Rectum, NOS	Poorly differentiated; Grade III	20	Blank(s)	Blank(s)	T3	Blank(s)	Blank(s)	N0	Blank(s)	Blank(s)	Blank(s)	Blank(s)	Blank(s)	Blank(s)	Blank(s)	Blank(s)	Blank(s)	Blank(s)	99	99	Blank(s)	Radiation after surgery	Beam radiation	Dead (attributable to this cancer dx)	Alive or dead due to cancer	44	Colon excluding Rectum	One primary only	September	No/Unknown
1831150	1988	Male	64	White	Married (including common law)	Sigmoid Colon	8140/3: Adenocarcinoma, NOS	C18.7-Sigmoid colon	Moderately differentiated; Grade II	30	Blank(s)	Blank(s)	T3	Blank(s)	Blank(s)	N1	Blank(s)	Blank(s)	Blank(s)	Blank(s)	Blank(s)	Blank(s)	Blank(s)	Blank(s)	Blank(s)	Blank(s)	5	3	Blank(s)	No radiation and/or cancer-directed surgery	None	Dead (attributable to this cancer dx)	Alive or dead due to cancer	95	Colon excluding Rectum	One primary only	July	No/Unknown
1831380	1989	Male	57	White	Married (including common law)	Cecum	8140/3: Adenocarcinoma, NOS	C18.0-Cecum	Moderately differentiated; Grade II	20	Blank(s)	Blank(s)	T3	Blank(s)	Blank(s)	N0	Blank(s)	Blank(s)	Blank(s)	Blank(s)	Blank(s)	Blank(s)	Blank(s)	Blank(s)	Blank(s)	Blank(s)	24	0	Blank(s)	No radiation and/or cancer-directed surgery	Recommended, unknown if administered	Alive or dead of other cause	Dead (attributable to causes other than this cancer dx)	269	Diseases of Heart	One primary only	October	No/Unknown
1831397	1988	Male	65	White	Married (including common law)	Sigmoid Colon	8140/3: Adenocarcinoma, NOS	C18.7-Sigmoid colon	Moderately differentiated; Grade II	20	Blank(s)	Blank(s)	T3	Blank(s)	Blank(s)	N0	Blank(s)	Blank(s)	Blank(s)	Blank(s)	Blank(s)	Blank(s)	Blank(s)	Blank(s)	Blank(s)	Blank(s)	4	0	Blank(s)	No radiation and/or cancer-directed surgery	None	Alive or dead of other cause	Dead (attributable to causes other than this cancer dx)	232	Diseases of Heart	One primary only	August	No/Unknown
1831399	1989	Male	63	Asian or Pacific Islander	Married (including common law)	Rectum	8140/3: Adenocarcinoma, NOS	C20.9-Rectum, NOS	Moderately differentiated; Grade II	10	Blank(s)	Blank(s)	T1	Blank(s)	Blank(s)	N0	Blank(s)	Blank(s)	Blank(s)	Blank(s)	Blank(s)	Blank(s)	Blank(s)	Blank(s)	Blank(s)	Blank(s)	0	98	Blank(s)	Radiation after surgery	Beam radiation	Dead (attributable to this cancer dx)	Alive or dead due to cancer	103	Colon excluding Rectum	One primary only	October	Yes
1831514	1989	Male	74	White	Widowed	Transverse Colon	8140/3: Adenocarcinoma, NOS	C18.4-Transverse colon	Moderately differentiated; Grade II	20	Blank(s)	Blank(s)	T3	Blank(s)	Blank(s)	N0	Blank(s)	Blank(s)	Blank(s)	Blank(s)	Blank(s)	Blank(s)	Blank(s)	Blank(s)	Blank(s)	Blank(s)	5	0	Blank(s)	No radiation and/or cancer-directed surgery	None	Alive or dead of other cause	Dead (attributable to causes other than this cancer dx)	16	Diseases of Heart	One primary only	February	No/Unknown
1831605	1989	Male	67	White	Married (including common law)	Rectum	8140/3: Adenocarcinoma, NOS	C20.9-Rectum, NOS	Well differentiated; Grade I	10	Blank(s)	Blank(s)	T1	Blank(s)	Blank(s)	N0	Blank(s)	Blank(s)	Blank(s)	Blank(s)	Blank(s)	Blank(s)	Blank(s)	Blank(s)	Blank(s)	Blank(s)	16	0	Blank(s)	No radiation and/or cancer-directed surgery	None	Dead (attributable to this cancer dx)	Alive or dead due to cancer	99	Rectum and Rectosigmoid Junction	One primary only	June	No/Unknown
1831615	1990	Male	75	White	Widowed	Rectosigmoid Junction	8140/3: Adenocarcinoma, NOS	C19.9-Rectosigmoid junction	Moderately differentiated; Grade II	20	Blank(s)	Blank(s)	T3	Blank(s)	Blank(s)	N0	Blank(s)	Blank(s)	Blank(s)	Blank(s)	Blank(s)	Blank(s)	Blank(s)	Blank(s)	Blank(s)	Blank(s)	0	98	Blank(s)	No radiation and/or cancer-directed surgery	None	Dead (attributable to this cancer dx)	Alive or dead due to cancer	39	Rectum and Rectosigmoid Junction	One primary only	June	No/Unknown
1831643	1990	Male	44	Black	Married (including common law)	Sigmoid Colon	8140/3: Adenocarcinoma, NOS	C18.7-Sigmoid colon	Moderately differentiated; Grade II	20	Blank(s)	Blank(s)	T3	Blank(s)	Blank(s)	N0	Blank(s)	Blank(s)	Blank(s)	Blank(s)	Blank(s)	Blank(s)	Blank(s)	Blank(s)	Blank(s)	Blank(s)	5	0	Blank(s)	No radiation and/or cancer-directed surgery	None	Dead (attributable to this cancer dx)	Alive or dead due to cancer	51	Colon excluding Rectum	One primary only	June	No/Unknown
1831660	1988	Male	46	White	Married (including common law)	Rectum	8140/3: Adenocarcinoma, NOS	C20.9-Rectum, NOS	Moderately differentiated; Grade II	30	Blank(s)	Blank(s)	T3	Blank(s)	Blank(s)	N3	Blank(s)	Blank(s)	Blank(s)	Blank(s)	Blank(s)	Blank(s)	Blank(s)	Blank(s)	Blank(s)	Blank(s)	4	3	Blank(s)	Radiation prior to surgery	Beam radiation	Alive or dead of other cause	Dead (attributable to causes other than this cancer dx)	93	State DC not available or state DC available but no COD	One primary only	September	No/Unknown
1831753	1989	Female	56	Black	Married (including common law)	Cecum	8140/3: Adenocarcinoma, NOS	C18.0-Cecum	Moderately differentiated; Grade II	10	Blank(s)	Blank(s)	T2	Blank(s)	Blank(s)	N0	Blank(s)	Blank(s)	Blank(s)	Blank(s)	Blank(s)	Blank(s)	Blank(s)	Blank(s)	Blank(s)	Blank(s)	9	0	Blank(s)	No radiation and/or cancer-directed surgery	None	Alive or dead of other cause	Alive or dead due to cancer	297	Alive	One primary only	March	No/Unknown
1831844	1989	Female	76	White	Married (including common law)	Cecum	8140/3: Adenocarcinoma, NOS	C18.0-Cecum	Moderately differentiated; Grade II	20	Blank(s)	Blank(s)	T3	Blank(s)	Blank(s)	N0	Blank(s)	Blank(s)	Blank(s)	Blank(s)	Blank(s)	Blank(s)	Blank(s)	Blank(s)	Blank(s)	Blank(s)	17	0	Blank(s)	No radiation and/or cancer-directed surgery	None	Alive or dead of other cause	Dead (attributable to causes other than this cancer dx)	184	Diseases of Heart	One primary only	April	No/Unknown
1831902	1991	Female	76	White	Single (never married)	Sigmoid Colon	8140/3: Adenocarcinoma, NOS	C18.7-Sigmoid colon	Moderately differentiated; Grade II	10	Blank(s)	Blank(s)	T2	Blank(s)	Blank(s)	N0	Blank(s)	Blank(s)	Blank(s)	Blank(s)	Blank(s)	Blank(s)	Blank(s)	Blank(s)	Blank(s)	Blank(s)	11	0	Blank(s)	No radiation and/or cancer-directed surgery	None	Alive or dead of other cause	Dead (attributable to causes other than this cancer dx)	125	Other Diseases of Arteries, Arterioles, Capillaries	One primary only	March	No/Unknown
1831971	1989	Female	77	White	Divorced	Rectum	8140/3: Adenocarcinoma, NOS	C20.9-Rectum, NOS	Moderately differentiated; Grade II	20	Blank(s)	Blank(s)	T3	Blank(s)	Blank(s)	N0	Blank(s)	Blank(s)	Blank(s)	Blank(s)	Blank(s)	Blank(s)	Blank(s)	Blank(s)	Blank(s)	Blank(s)	26	0	Blank(s)	No radiation and/or cancer-directed surgery	None	Alive or dead of other cause	Dead (attributable to causes other than this cancer dx)	84	Other Cause of Death	One primary only	April	No/Unknown
1832004	1988	Male	76	White	Married (including common law)	Rectum	8140/3: Adenocarcinoma, NOS	C20.9-Rectum, NOS	Moderately differentiated; Grade II	10	Blank(s)	Blank(s)	T2	Blank(s)	Blank(s)	N0	Blank(s)	Blank(s)	Blank(s)	Blank(s)	Blank(s)	Blank(s)	Blank(s)	Blank(s)	Blank(s)	Blank(s)	6	0	Blank(s)	No radiation and/or cancer-directed surgery	None	Dead (attributable to this cancer dx)	Alive or dead due to cancer	96	Stomach and Duodenal Ulcers	One primary only	April	No/Unknown
1832100	1988	Male	64	White	Married (including common law)	Rectum	8140/3: Adenocarcinoma, NOS	C20.9-Rectum, NOS	Moderately differentiated; Grade II	10	Blank(s)	Blank(s)	T2	Blank(s)	Blank(s)	N0	Blank(s)	Blank(s)	Blank(s)	Blank(s)	Blank(s)	Blank(s)	Blank(s)	Blank(s)	Blank(s)	Blank(s)	6	0	Blank(s)	No radiation and/or cancer-directed surgery	None	Alive or dead of other cause	Alive or dead due to cancer	309	Alive	One primary only	March	No/Unknown
1832247	1990	Female	77	White	Married (including common law)	Cecum	8140/3: Adenocarcinoma, NOS	C18.0-Cecum	Moderately differentiated; Grade II	20	Blank(s)	Blank(s)	T3	Blank(s)	Blank(s)	N0	Blank(s)	Blank(s)	Blank(s)	Blank(s)	Blank(s)	Blank(s)	Blank(s)	Blank(s)	Blank(s)	Blank(s)	8	0	Blank(s)	No radiation and/or cancer-directed surgery	None	Alive or dead of other cause	Dead (attributable to causes other than this cancer dx)	109	Diseases of Heart	One primary only	July	Yes
1832317	1990	Male	68	Asian or Pacific Islander	Married (including common law)	Transverse Colon	8140/3: Adenocarcinoma, NOS	C18.4-Transverse colon	Moderately differentiated; Grade II	10	Blank(s)	Blank(s)	T2	Blank(s)	Blank(s)	N0	Blank(s)	Blank(s)	Blank(s)	Blank(s)	Blank(s)	Blank(s)	Blank(s)	Blank(s)	Blank(s)	Blank(s)	6	0	Blank(s)	No radiation and/or cancer-directed surgery	None	Alive or dead of other cause	Dead (attributable to causes other than this cancer dx)	12	Cerebrovascular Diseases	One primary only	August	No/Unknown
1832524	1988	Male	79	White	Married (including common law)	Transverse Colon	8480/3: Mucinous adenocarcinoma	C18.4-Transverse colon	Moderately differentiated; Grade II	20	Blank(s)	Blank(s)	T3	Blank(s)	Blank(s)	N0	Blank(s)	Blank(s)	Blank(s)	Blank(s)	Blank(s)	Blank(s)	Blank(s)	Blank(s)	Blank(s)	Blank(s)	5	0	Blank(s)	No radiation and/or cancer-directed surgery	None	Dead (attributable to this cancer dx)	Alive or dead due to cancer	1	Colon excluding Rectum	One primary only	January	No/Unknown
1832552	1989	Female	78	White	Single (never married)	Transverse Colon	8140/3: Adenocarcinoma, NOS	C18.4-Transverse colon	Poorly differentiated; Grade III	20	Blank(s)	Blank(s)	T3	Blank(s)	Blank(s)	N0	Blank(s)	Blank(s)	Blank(s)	Blank(s)	Blank(s)	Blank(s)	Blank(s)	Blank(s)	Blank(s)	Blank(s)	7	0	Blank(s)	No radiation and/or cancer-directed surgery	None	Dead (attributable to this cancer dx)	Alive or dead due to cancer	9	Colon excluding Rectum	One primary only	January	No/Unknown
1832556	1991	Male	74	Asian or Pacific Islander	Married (including common law)	Sigmoid Colon	8140/3: Adenocarcinoma, NOS	C18.7-Sigmoid colon	Moderately differentiated; Grade II	30	Blank(s)	Blank(s)	T3	Blank(s)	Blank(s)	N3	Blank(s)	Blank(s)	Blank(s)	Blank(s)	Blank(s)	Blank(s)	Blank(s)	Blank(s)	Blank(s)	Blank(s)	11	2	Blank(s)	No radiation and/or cancer-directed surgery	None	Alive or dead of other cause	Dead (attributable to causes other than this cancer dx)	235	Other Cause of Death	One primary only	April	Yes
1832606	1990	Male	72	White	Married (including common law)	Cecum	8140/3: Adenocarcinoma, NOS	C18.0-Cecum	Moderately differentiated; Grade II	20	Blank(s)	Blank(s)	T3	Blank(s)	Blank(s)	N0	Blank(s)	Blank(s)	Blank(s)	Blank(s)	Blank(s)	Blank(s)	Blank(s)	Blank(s)	Blank(s)	Blank(s)	7	0	Blank(s)	No radiation and/or cancer-directed surgery	None	Dead (attributable to this cancer dx)	Alive or dead due to cancer	16	Colon excluding Rectum	One primary only	September	No/Unknown
1832711	1988	Male	42	White	Divorced	Sigmoid Colon	8140/3: Adenocarcinoma, NOS	C18.7-Sigmoid colon	Moderately differentiated; Grade II	30	Blank(s)	Blank(s)	T3	Blank(s)	Blank(s)	N1	Blank(s)	Blank(s)	Blank(s)	Blank(s)	Blank(s)	Blank(s)	Blank(s)	Blank(s)	Blank(s)	Blank(s)	15	1	Blank(s)	No radiation and/or cancer-directed surgery	None	Alive or dead of other cause	Dead (attributable to causes other than this cancer dx)	258	Other Cause of Death	One primary only	July	No/Unknown
1832735	1989	Female	56	White	Single (never married)	Hepatic Flexure	8140/3: Adenocarcinoma, NOS	C18.3-Hepatic flexure of colon	Poorly differentiated; Grade III	20	Blank(s)	Blank(s)	T3	Blank(s)	Blank(s)	N0	Blank(s)	Blank(s)	Blank(s)	Blank(s)	Blank(s)	Blank(s)	Blank(s)	Blank(s)	Blank(s)	Blank(s)	8	0	Blank(s)	No radiation and/or cancer-directed surgery	None	Alive or dead of other cause	Alive or dead due to cancer	299	Alive	One primary only	January	No/Unknown
1832737	1990	Male	67	White	Married (including common law)	Rectosigmoid Junction	8140/3: Adenocarcinoma, NOS	C19.9-Rectosigmoid junction	Moderately differentiated; Grade II	30	Blank(s)	Blank(s)	T3	Blank(s)	Blank(s)	N1	Blank(s)	Blank(s)	Blank(s)	Blank(s)	Blank(s)	Blank(s)	Blank(s)	Blank(s)	Blank(s)	Blank(s)	42	3	Blank(s)	No radiation and/or cancer-directed surgery	None	Dead (attributable to this cancer dx)	Alive or dead due to cancer	39	Colon excluding Rectum	One primary only	February	Yes
1832837	1991	Male	77	Asian or Pacific Islander	Married (including common law)	Transverse Colon	8140/3: Adenocarcinoma, NOS	C18.4-Transverse colon	Moderately differentiated; Grade II	20	Blank(s)	Blank(s)	T3	Blank(s)	Blank(s)	N0	Blank(s)	Blank(s)	Blank(s)	Blank(s)	Blank(s)	Blank(s)	Blank(s)	Blank(s)	Blank(s)	Blank(s)	11	0	Blank(s)	No radiation and/or cancer-directed surgery	None	Alive or dead of other cause	Dead (attributable to causes other than this cancer dx)	212	Chronic Obstructive Pulmonary Disease and Allied Cond	One primary only	June	No/Unknown
1832968	1990	Male	67	Black	Single (never married)	Sigmoid Colon	8140/3: Adenocarcinoma, NOS	C18.7-Sigmoid colon	Moderately differentiated; Grade II	30	Blank(s)	Blank(s)	T3	Blank(s)	Blank(s)	N3	Blank(s)	Blank(s)	Blank(s)	Blank(s)	Blank(s)	Blank(s)	Blank(s)	Blank(s)	Blank(s)	Blank(s)	9	3	Blank(s)	No radiation and/or cancer-directed surgery	None	Alive or dead of other cause	Dead (attributable to causes other than this cancer dx)	2	Cerebrovascular Diseases	One primary only	August	No/Unknown
1833020	1991	Female	75	White	Widowed	Ascending Colon	8140/3: Adenocarcinoma, NOS	C18.2-Ascending colon	Poorly differentiated; Grade III	30	Blank(s)	Blank(s)	T3	Blank(s)	Blank(s)	N2	Blank(s)	Blank(s)	Blank(s)	Blank(s)	Blank(s)	Blank(s)	Blank(s)	Blank(s)	Blank(s)	Blank(s)	12	4	Blank(s)	No radiation and/or cancer-directed surgery	None	Alive or dead of other cause	Dead (attributable to causes other than this cancer dx)	120	Diseases of Heart	One primary only	March	No/Unknown
1833048	1989	Male	55	White	Married (including common law)	Sigmoid Colon	8140/3: Adenocarcinoma, NOS	C18.7-Sigmoid colon	Poorly differentiated; Grade III	10	Blank(s)	Blank(s)	T2	Blank(s)	Blank(s)	N0	Blank(s)	Blank(s)	Blank(s)	Blank(s)	Blank(s)	Blank(s)	Blank(s)	Blank(s)	Blank(s)	Blank(s)	8	0	Blank(s)	No radiation and/or cancer-directed surgery	None	Alive or dead of other cause	Alive or dead due to cancer	295	Alive	One primary only	May	No/Unknown
1833139	1988	Female	41	Asian or Pacific Islander	Married (including common law)	Rectum	8140/3: Adenocarcinoma, NOS	C20.9-Rectum, NOS	Moderately differentiated; Grade II	30	Blank(s)	Blank(s)	T3	Blank(s)	Blank(s)	N3	Blank(s)	Blank(s)	Blank(s)	Blank(s)	Blank(s)	Blank(s)	Blank(s)	Blank(s)	Blank(s)	Blank(s)	98	97	Blank(s)	Radiation after surgery	Beam radiation	Dead (attributable to this cancer dx)	Alive or dead due to cancer	29	Colon excluding Rectum	One primary only	November	No/Unknown
1833194	1991	Male	71	White	Married (including common law)	Splenic Flexure	8480/3: Mucinous adenocarcinoma	C18.5-Splenic flexure of colon	Moderately differentiated; Grade II	20	Blank(s)	Blank(s)	T3	Blank(s)	Blank(s)	N0	Blank(s)	Blank(s)	Blank(s)	Blank(s)	Blank(s)	Blank(s)	Blank(s)	Blank(s)	Blank(s)	Blank(s)	26	0	Blank(s)	No radiation and/or cancer-directed surgery	None	Alive or dead of other cause	Dead (attributable to causes other than this cancer dx)	179	Cerebrovascular Diseases	One primary only	February	No/Unknown
1833346	1989	Female	61	White	Married (including common law)	Descending Colon	8140/3: Adenocarcinoma, NOS	C18.6-Descending colon	Moderately differentiated; Grade II	30	Blank(s)	Blank(s)	T3	Blank(s)	Blank(s)	N1	Blank(s)	Blank(s)	Blank(s)	Blank(s)	Blank(s)	Blank(s)	Blank(s)	Blank(s)	Blank(s)	Blank(s)	14	1	Blank(s)	No radiation and/or cancer-directed surgery	None	Alive or dead of other cause	Alive or dead due to cancer	289	Alive	One primary only	November	No/Unknown
1833388	1988	Male	43	White	Married (including common law)	Cecum	8140/3: Adenocarcinoma, NOS	C18.0-Cecum	Moderately differentiated; Grade II	10	Blank(s)	Blank(s)	T1	Blank(s)	Blank(s)	N0	Blank(s)	Blank(s)	Blank(s)	Blank(s)	Blank(s)	Blank(s)	Blank(s)	Blank(s)	Blank(s)	Blank(s)	17	0	Blank(s)	No radiation and/or cancer-directed surgery	None	Alive or dead of other cause	Alive or dead due to cancer	308	Alive	One primary only	April	No/Unknown
1833424	1991	Male	27	Asian or Pacific Islander	Single (never married)	Sigmoid Colon	8140/3: Adenocarcinoma, NOS	C18.7-Sigmoid colon	Moderately differentiated; Grade II	10	Blank(s)	Blank(s)	T1	Blank(s)	Blank(s)	N0	Blank(s)	Blank(s)	Blank(s)	Blank(s)	Blank(s)	Blank(s)	Blank(s)	Blank(s)	Blank(s)	Blank(s)	5	0	Blank(s)	No radiation and/or cancer-directed surgery	None	Alive or dead of other cause	Alive or dead due to cancer	272	Alive	One primary only	April	No/Unknown
1833550	1989	Female	73	White	Married (including common law)	Ascending Colon	8140/3: Adenocarcinoma, NOS	C18.2-Ascending colon	Moderately differentiated; Grade II	30	Blank(s)	Blank(s)	T3	Blank(s)	Blank(s)	N3	Blank(s)	Blank(s)	Blank(s)	Blank(s)	Blank(s)	Blank(s)	Blank(s)	Blank(s)	Blank(s)	Blank(s)	39	1	Blank(s)	No radiation and/or cancer-directed surgery	None	Alive or dead of other cause	Alive or dead due to cancer	293	Alive	One primary only	July	Yes
1833971	1990	Male	46	Black	Single (never married)	Rectosigmoid Junction	8140/3: Adenocarcinoma, NOS	C19.9-Rectosigmoid junction	Well differentiated; Grade I	20	Blank(s)	Blank(s)	T3	Blank(s)	Blank(s)	N0	Blank(s)	Blank(s)	Blank(s)	Blank(s)	Blank(s)	Blank(s)	Blank(s)	Blank(s)	Blank(s)	Blank(s)	21	0	Blank(s)	No radiation and/or cancer-directed surgery	None	Dead (attributable to this cancer dx)	Alive or dead due to cancer	34	Colon excluding Rectum	One primary only	August	No/Unknown
1833992	1988	Male	49	Asian or Pacific Islander	Married (including common law)	Hepatic Flexure	8140/3: Adenocarcinoma, NOS	C18.3-Hepatic flexure of colon	Moderately differentiated; Grade II	30	Blank(s)	Blank(s)	T3	Blank(s)	Blank(s)	N1	Blank(s)	Blank(s)	Blank(s)	Blank(s)	Blank(s)	Blank(s)	Blank(s)	Blank(s)	Blank(s)	Blank(s)	18	2	Blank(s)	No radiation and/or cancer-directed surgery	None	Dead (attributable to this cancer dx)	Alive or dead due to cancer	31	Colon excluding Rectum	One primary only	August	No/Unknown
1834002	1990	Male	78	White	Married (including common law)	Rectum	8140/3: Adenocarcinoma, NOS	C20.9-Rectum, NOS	Moderately differentiated; Grade II	10	Blank(s)	Blank(s)	T2	Blank(s)	Blank(s)	N0	Blank(s)	Blank(s)	Blank(s)	Blank(s)	Blank(s)	Blank(s)	Blank(s)	Blank(s)	Blank(s)	Blank(s)	14	0	Blank(s)	No radiation and/or cancer-directed surgery	None	Alive or dead of other cause	Dead (attributable to causes other than this cancer dx)	7	Other Cause of Death	One primary only	June	No/Unknown
1834011	1991	Female	70	White	Married (including common law)	Cecum	8140/3: Adenocarcinoma, NOS	C18.0-Cecum	Moderately differentiated; Grade II	20	Blank(s)	Blank(s)	T3	Blank(s)	Blank(s)	N0	Blank(s)	Blank(s)	Blank(s)	Blank(s)	Blank(s)	Blank(s)	Blank(s)	Blank(s)	Blank(s)	Blank(s)	3	0	Blank(s)	No radiation and/or cancer-directed surgery	None	Dead (attributable to this cancer dx)	Alive or dead due to cancer	16	Colon excluding Rectum	One primary only	April	No/Unknown
1834032	1990	Male	55	White	Married (including common law)	Sigmoid Colon	8480/3: Mucinous adenocarcinoma	C18.7-Sigmoid colon	Poorly differentiated; Grade III	30	Blank(s)	Blank(s)	T3	Blank(s)	Blank(s)	N2	Blank(s)	Blank(s)	Blank(s)	Blank(s)	Blank(s)	Blank(s)	Blank(s)	Blank(s)	Blank(s)	Blank(s)	8	4	Blank(s)	No radiation and/or cancer-directed surgery	None	Dead (attributable to this cancer dx)	Alive or dead due to cancer	23	Colon excluding Rectum	One primary only	August	Yes
1834098	1989	Female	57	White	Married (including common law)	Rectum	8140/3: Adenocarcinoma, NOS	C20.9-Rectum, NOS	Moderately differentiated; Grade II	10	Blank(s)	Blank(s)	T2	Blank(s)	Blank(s)	N0	Blank(s)	Blank(s)	Blank(s)	Blank(s)	Blank(s)	Blank(s)	Blank(s)	Blank(s)	Blank(s)	Blank(s)	14	0	Blank(s)	No radiation and/or cancer-directed surgery	None	Alive or dead of other cause	Alive or dead due to cancer	297	Alive	One primary only	March	No/Unknown
1834186	1989	Male	73	White	Married (including common law)	Sigmoid Colon	8140/3: Adenocarcinoma, NOS	C18.7-Sigmoid colon	Moderately differentiated; Grade II	20	Blank(s)	Blank(s)	T3	Blank(s)	Blank(s)	N0	Blank(s)	Blank(s)	Blank(s)	Blank(s)	Blank(s)	Blank(s)	Blank(s)	Blank(s)	Blank(s)	Blank(s)	3	0	Blank(s)	No radiation and/or cancer-directed surgery	None	Dead (attributable to this cancer dx)	Alive or dead due to cancer	80	Rectum and Rectosigmoid Junction	One primary only	October	No/Unknown
1834238	1990	Female	73	White	Married (including common law)	Rectum	8140/3: Adenocarcinoma, NOS	C20.9-Rectum, NOS	Moderately differentiated; Grade II	20	Blank(s)	Blank(s)	T3	Blank(s)	Blank(s)	N0	Blank(s)	Blank(s)	Blank(s)	Blank(s)	Blank(s)	Blank(s)	Blank(s)	Blank(s)	Blank(s)	Blank(s)	11	0	Blank(s)	Radiation after surgery	Beam radiation	Dead (attributable to this cancer dx)	Alive or dead due to cancer	83	Rectum and Rectosigmoid Junction	One primary only	January	Yes
1834270	1990	Female	73	White	Married (including common law)	Sigmoid Colon	8480/3: Mucinous adenocarcinoma	C18.7-Sigmoid colon	Moderately differentiated; Grade II	20	Blank(s)	Blank(s)	T4	Blank(s)	Blank(s)	N0	Blank(s)	Blank(s)	Blank(s)	Blank(s)	Blank(s)	Blank(s)	Blank(s)	Blank(s)	Blank(s)	Blank(s)	12	0	Blank(s)	Radiation after surgery	Beam radiation	Alive or dead of other cause	Dead (attributable to causes other than this cancer dx)	51	Diseases of Heart	One primary only	November	Yes
1834352	1988	Female	45	Asian or Pacific Islander	Single (never married)	Transverse Colon	8140/3: Adenocarcinoma, NOS	C18.4-Transverse colon	Moderately differentiated; Grade II	20	Blank(s)	Blank(s)	T3	Blank(s)	Blank(s)	N0	Blank(s)	Blank(s)	Blank(s)	Blank(s)	Blank(s)	Blank(s)	Blank(s)	Blank(s)	Blank(s)	Blank(s)	34	0	Blank(s)	No radiation and/or cancer-directed surgery	None	Alive or dead of other cause	Alive or dead due to cancer	47	Alive	One primary only	August	No/Unknown
1834373	1990	Male	69	White	Unknown	Cecum	8140/3: Adenocarcinoma, NOS	C18.0-Cecum	Poorly differentiated; Grade III	30	Blank(s)	Blank(s)	T2	Blank(s)	Blank(s)	N3	Blank(s)	Blank(s)	Blank(s)	Blank(s)	Blank(s)	Blank(s)	Blank(s)	Blank(s)	Blank(s)	Blank(s)	25	4	Blank(s)	No radiation and/or cancer-directed surgery	None	Alive or dead of other cause	Alive or dead due to cancer	285	Alive	One primary only	March	Yes
1834383	1989	Female	69	Asian or Pacific Islander	Married (including common law)	Rectosigmoid Junction	8140/3: Adenocarcinoma, NOS	C19.9-Rectosigmoid junction	Moderately differentiated; Grade II	20	Blank(s)	Blank(s)	T3	Blank(s)	Blank(s)	N0	Blank(s)	Blank(s)	Blank(s)	Blank(s)	Blank(s)	Blank(s)	Blank(s)	Blank(s)	Blank(s)	Blank(s)	0	98	Blank(s)	Radiation prior to surgery	Beam radiation	Dead (attributable to this cancer dx)	Alive or dead due to cancer	43	Rectum and Rectosigmoid Junction	One primary only	November	No/Unknown
1834430	1990	Male	62	White	Married (including common law)	Rectum	8140/3: Adenocarcinoma, NOS	C20.9-Rectum, NOS	Moderately differentiated; Grade II	20	Blank(s)	Blank(s)	T3	Blank(s)	Blank(s)	N0	Blank(s)	Blank(s)	Blank(s)	Blank(s)	Blank(s)	Blank(s)	Blank(s)	Blank(s)	Blank(s)	Blank(s)	98	0	Blank(s)	No radiation and/or cancer-directed surgery	None	Alive or dead of other cause	Dead (attributable to causes other than this cancer dx)	55	Diseases of Heart	One primary only	June	No/Unknown
1834480	1991	Female	67	White	Married (including common law)	Sigmoid Colon	8140/3: Adenocarcinoma, NOS	C18.7-Sigmoid colon	Moderately differentiated; Grade II	30	Blank(s)	Blank(s)	T4	Blank(s)	Blank(s)	N3	Blank(s)	Blank(s)	Blank(s)	Blank(s)	Blank(s)	Blank(s)	Blank(s)	Blank(s)	Blank(s)	Blank(s)	14	3	Blank(s)	No radiation and/or cancer-directed surgery	None	Dead (attributable to this cancer dx)	Alive or dead due to cancer	17	Colon excluding Rectum	One primary only	April	No/Unknown
1834487	1988	Female	37	White	Married (including common law)	Rectosigmoid Junction	8140/3: Adenocarcinoma, NOS	C19.9-Rectosigmoid junction	Moderately differentiated; Grade II	20	Blank(s)	Blank(s)	T3	Blank(s)	Blank(s)	N0	Blank(s)	Blank(s)	Blank(s)	Blank(s)	Blank(s)	Blank(s)	Blank(s)	Blank(s)	Blank(s)	Blank(s)	29	0	Blank(s)	Radiation after surgery	Beam radiation	Dead (attributable to this cancer dx)	Alive or dead due to cancer	101	Rectum and Rectosigmoid Junction	One primary only	May	Yes
1834500	1988	Male	59	Asian or Pacific Islander	Married (including common law)	Ascending Colon	8140/3: Adenocarcinoma, NOS	C18.2-Ascending colon	Moderately differentiated; Grade II	20	Blank(s)	Blank(s)	T3	Blank(s)	Blank(s)	N0	Blank(s)	Blank(s)	Blank(s)	Blank(s)	Blank(s)	Blank(s)	Blank(s)	Blank(s)	Blank(s)	Blank(s)	12	0	Blank(s)	No radiation and/or cancer-directed surgery	None	Alive or dead of other cause	Alive or dead due to cancer	307	Alive	One primary only	May	No/Unknown
1834515	1988	Female	34	Asian or Pacific Islander	Married (including common law)	Sigmoid Colon	8140/3: Adenocarcinoma, NOS	C18.7-Sigmoid colon	Well differentiated; Grade I	20	Blank(s)	Blank(s)	T4	Blank(s)	Blank(s)	N0	Blank(s)	Blank(s)	Blank(s)	Blank(s)	Blank(s)	Blank(s)	Blank(s)	Blank(s)	Blank(s)	Blank(s)	98	99	Blank(s)	Radiation after surgery	Beam radiation	Alive or dead of other cause	Alive or dead due to cancer	309	Alive	One primary only	March	Yes
1834590	1988	Male	45	Asian or Pacific Islander	Married (including common law)	Ascending Colon	8140/3: Adenocarcinoma, NOS	C18.2-Ascending colon	Poorly differentiated; Grade III	20	Blank(s)	Blank(s)	T3	Blank(s)	Blank(s)	N0	Blank(s)	Blank(s)	Blank(s)	Blank(s)	Blank(s)	Blank(s)	Blank(s)	Blank(s)	Blank(s)	Blank(s)	9	0	Blank(s)	No radiation and/or cancer-directed surgery	None	Dead (attributable to this cancer dx)	Alive or dead due to cancer	10	Colon excluding Rectum	One primary only	November	No/Unknown
1834628	1990	Female	43	White	Married (including common law)	Rectum	8140/3: Adenocarcinoma, NOS	C20.9-Rectum, NOS	Poorly differentiated; Grade III	20	Blank(s)	Blank(s)	T4	Blank(s)	Blank(s)	N0	Blank(s)	Blank(s)	Blank(s)	Blank(s)	Blank(s)	Blank(s)	Blank(s)	Blank(s)	Blank(s)	Blank(s)	22	0	Blank(s)	Radiation after surgery	Beam radiation	Dead (attributable to this cancer dx)	Alive or dead due to cancer	36	Colon excluding Rectum	One primary only	February	Yes
1834952	1990	Female	62	White	Married (including common law)	Transverse Colon	8140/3: Adenocarcinoma, NOS	C18.4-Transverse colon	Poorly differentiated; Grade III	20	Blank(s)	Blank(s)	T4	Blank(s)	Blank(s)	N0	Blank(s)	Blank(s)	Blank(s)	Blank(s)	Blank(s)	Blank(s)	Blank(s)	Blank(s)	Blank(s)	Blank(s)	8	0	Blank(s)	No radiation and/or cancer-directed surgery	None	Dead (attributable to this cancer dx)	Alive or dead due to cancer	8	Colon excluding Rectum	One primary only	September	No/Unknown
1835087	1990	Male	56	White	Married (including common law)	Descending Colon	8140/3: Adenocarcinoma, NOS	C18.6-Descending colon	Moderately differentiated; Grade II	10	Blank(s)	Blank(s)	T2	Blank(s)	Blank(s)	N0	Blank(s)	Blank(s)	Blank(s)	Blank(s)	Blank(s)	Blank(s)	Blank(s)	Blank(s)	Blank(s)	Blank(s)	8	0	Blank(s)	No radiation and/or cancer-directed surgery	None	Alive or dead of other cause	Alive or dead due to cancer	280	Alive	One primary only	August	No/Unknown
1835113	1988	Male	70	White	Married (including common law)	Hepatic Flexure	8140/3: Adenocarcinoma, NOS	C18.3-Hepatic flexure of colon	Moderately differentiated; Grade II	20	Blank(s)	Blank(s)	T3	Blank(s)	Blank(s)	N0	Blank(s)	Blank(s)	Blank(s)	Blank(s)	Blank(s)	Blank(s)	Blank(s)	Blank(s)	Blank(s)	Blank(s)	18	0	Blank(s)	No radiation and/or cancer-directed surgery	None	Alive or dead of other cause	Dead (attributable to causes other than this cancer dx)	168	Diseases of Heart	One primary only	May	Yes
1835169	1990	Male	49	White	Married (including common law)	Rectum	8140/3: Adenocarcinoma, NOS	C20.9-Rectum, NOS	Moderately differentiated; Grade II	20	Blank(s)	Blank(s)	T4	Blank(s)	Blank(s)	N0	Blank(s)	Blank(s)	Blank(s)	Blank(s)	Blank(s)	Blank(s)	Blank(s)	Blank(s)	Blank(s)	Blank(s)	11	0	Blank(s)	Radiation after surgery	Beam radiation	Dead (attributable to this cancer dx)	Alive or dead due to cancer	41	Rectum and Rectosigmoid Junction	One primary only	September	Yes
1835175	1988	Male	52	White	Married (including common law)	Rectosigmoid Junction	8140/3: Adenocarcinoma, NOS	C19.9-Rectosigmoid junction	Poorly differentiated; Grade III	20	Blank(s)	Blank(s)	T3	Blank(s)	Blank(s)	N0	Blank(s)	Blank(s)	Blank(s)	Blank(s)	Blank(s)	Blank(s)	Blank(s)	Blank(s)	Blank(s)	Blank(s)	14	0	Blank(s)	No radiation and/or cancer-directed surgery	None	Alive or dead of other cause	Alive or dead due to cancer	304	Alive	One primary only	August	No/Unknown
1835382	1991	Female	64	White	Single (never married)	Transverse Colon	8140/3: Adenocarcinoma, NOS	C18.4-Transverse colon	Poorly differentiated; Grade III	30	Blank(s)	Blank(s)	T4	Blank(s)	Blank(s)	N3	Blank(s)	Blank(s)	Blank(s)	Blank(s)	Blank(s)	Blank(s)	Blank(s)	Blank(s)	Blank(s)	Blank(s)	8	5	Blank(s)	No radiation and/or cancer-directed surgery	None	Alive or dead of other cause	Alive or dead due to cancer	271	Alive	One primary only	May	Yes
1835456	1988	Male	69	White	Married (including common law)	Splenic Flexure	8140/3: Adenocarcinoma, NOS	C18.5-Splenic flexure of colon	Moderately differentiated; Grade II	20	Blank(s)	Blank(s)	T3	Blank(s)	Blank(s)	N0	Blank(s)	Blank(s)	Blank(s)	Blank(s)	Blank(s)	Blank(s)	Blank(s)	Blank(s)	Blank(s)	Blank(s)	14	0	Blank(s)	No radiation and/or cancer-directed surgery	None	Alive or dead of other cause	Alive or dead due to cancer	166	Alive	One primary only	December	No/Unknown
1835487	1988	Female	70	Black	Separated	Cecum	8140/3: Adenocarcinoma, NOS	C18.0-Cecum	Moderately differentiated; Grade II	30	Blank(s)	Blank(s)	T2	Blank(s)	Blank(s)	N1	Blank(s)	Blank(s)	Blank(s)	Blank(s)	Blank(s)	Blank(s)	Blank(s)	Blank(s)	Blank(s)	Blank(s)	13	2	Blank(s)	Radiation after surgery	Beam radiation	Alive or dead of other cause	Dead (attributable to causes other than this cancer dx)	16	Diseases of Heart	One primary only	March	No/Unknown
1835689	1988	Female	75	White	Widowed	Rectum	8140/3: Adenocarcinoma, NOS	C20.9-Rectum, NOS	Poorly differentiated; Grade III	10	Blank(s)	Blank(s)	T1	Blank(s)	Blank(s)	N0	Blank(s)	Blank(s)	Blank(s)	Blank(s)	Blank(s)	Blank(s)	Blank(s)	Blank(s)	Blank(s)	Blank(s)	3	0	Blank(s)	No radiation and/or cancer-directed surgery	None	Alive or dead of other cause	Dead (attributable to causes other than this cancer dx)	157	Cerebrovascular Diseases	One primary only	June	No/Unknown
1835794	1991	Female	80	White	Widowed	Sigmoid Colon	8140/3: Adenocarcinoma, NOS	C18.7-Sigmoid colon	Moderately differentiated; Grade II	10	Blank(s)	Blank(s)	T2	Blank(s)	Blank(s)	N0	Blank(s)	Blank(s)	Blank(s)	Blank(s)	Blank(s)	Blank(s)	Blank(s)	Blank(s)	Blank(s)	Blank(s)	8	0	Blank(s)	No radiation and/or cancer-directed surgery	None	Alive or dead of other cause	Dead (attributable to causes other than this cancer dx)	18	Other Cause of Death	One primary only	April	No/Unknown
1835812	1988	Male	76	White	Married (including common law)	Cecum	8140/3: Adenocarcinoma, NOS	C18.0-Cecum	Moderately differentiated; Grade II	20	Blank(s)	Blank(s)	T3	Blank(s)	Blank(s)	N0	Blank(s)	Blank(s)	Blank(s)	Blank(s)	Blank(s)	Blank(s)	Blank(s)	Blank(s)	Blank(s)	Blank(s)	5	0	Blank(s)	No radiation and/or cancer-directed surgery	None	Alive or dead of other cause	Dead (attributable to causes other than this cancer dx)	38	Chronic Liver Disease and Cirrhosis	One primary only	November	No/Unknown
1835822	1988	Female	76	White	Widowed	Rectum	8140/3: Adenocarcinoma, NOS	C20.9-Rectum, NOS	Moderately differentiated; Grade II	20	Blank(s)	Blank(s)	T3	Blank(s)	Blank(s)	N0	Blank(s)	Blank(s)	Blank(s)	Blank(s)	Blank(s)	Blank(s)	Blank(s)	Blank(s)	Blank(s)	Blank(s)	12	0	Blank(s)	Radiation prior to surgery	Beam radiation	Dead (attributable to this cancer dx)	Alive or dead due to cancer	26	Colon excluding Rectum	One primary only	July	Yes
1836059	1988	Male	72	White	Married (including common law)	Hepatic Flexure	8481/3: Mucin-producing adenocarcinoma	C18.3-Hepatic flexure of colon	Well differentiated; Grade I	20	Blank(s)	Blank(s)	T3	Blank(s)	Blank(s)	N0	Blank(s)	Blank(s)	Blank(s)	Blank(s)	Blank(s)	Blank(s)	Blank(s)	Blank(s)	Blank(s)	Blank(s)	1	0	Blank(s)	No radiation and/or cancer-directed surgery	None	Alive or dead of other cause	Dead (attributable to causes other than this cancer dx)	135	Tuberculosis	One primary only	July	No/Unknown
1836115	1990	Female	74	White	Widowed	Cecum	8140/3: Adenocarcinoma, NOS	C18.0-Cecum	Moderately differentiated; Grade II	20	Blank(s)	Blank(s)	T4	Blank(s)	Blank(s)	N0	Blank(s)	Blank(s)	Blank(s)	Blank(s)	Blank(s)	Blank(s)	Blank(s)	Blank(s)	Blank(s)	Blank(s)	6	0	Blank(s)	No radiation and/or cancer-directed surgery	None	Alive or dead of other cause	Dead (attributable to causes other than this cancer dx)	175	Diseases of Heart	One primary only	June	No/Unknown
1836317	1988	Male	77	White	Married (including common law)	Rectosigmoid Junction	8140/3: Adenocarcinoma, NOS	C19.9-Rectosigmoid junction	Moderately differentiated; Grade II	10	Blank(s)	Blank(s)	T2	Blank(s)	Blank(s)	N0	Blank(s)	Blank(s)	Blank(s)	Blank(s)	Blank(s)	Blank(s)	Blank(s)	Blank(s)	Blank(s)	Blank(s)	4	0	Blank(s)	No radiation and/or cancer-directed surgery	None	Alive or dead of other cause	Dead (attributable to causes other than this cancer dx)	59	Diseases of Heart	One primary only	August	No/Unknown
1836410	1988	Male	78	White	Married (including common law)	Sigmoid Colon	8140/3: Adenocarcinoma, NOS	C18.7-Sigmoid colon	Poorly differentiated; Grade III	30	Blank(s)	Blank(s)	T3	Blank(s)	Blank(s)	N3	Blank(s)	Blank(s)	Blank(s)	Blank(s)	Blank(s)	Blank(s)	Blank(s)	Blank(s)	Blank(s)	Blank(s)	11	2	Blank(s)	No radiation and/or cancer-directed surgery	None	Alive or dead of other cause	Dead (attributable to causes other than this cancer dx)	19	Accidents and Adverse Effects	One primary only	June	No/Unknown
1836448	1991	Male	61	White	Married (including common law)	Rectum	8140/3: Adenocarcinoma, NOS	C20.9-Rectum, NOS	Moderately differentiated; Grade II	30	Blank(s)	Blank(s)	T3	Blank(s)	Blank(s)	N1	Blank(s)	Blank(s)	Blank(s)	Blank(s)	Blank(s)	Blank(s)	Blank(s)	Blank(s)	Blank(s)	Blank(s)	8	1	Blank(s)	Radiation after surgery	Beam radiation	Alive or dead of other cause	Alive or dead due to cancer	274	Alive	One primary only	February	Yes
1836456	1988	Male	73	White	Widowed	Rectum	8140/3: Adenocarcinoma, NOS	C20.9-Rectum, NOS	Moderately differentiated; Grade II	20	Blank(s)	Blank(s)	T3	Blank(s)	Blank(s)	N0	Blank(s)	Blank(s)	Blank(s)	Blank(s)	Blank(s)	Blank(s)	Blank(s)	Blank(s)	Blank(s)	Blank(s)	2	0	Blank(s)	No radiation and/or cancer-directed surgery	None	Alive or dead of other cause	Dead (attributable to causes other than this cancer dx)	108	Chronic Obstructive Pulmonary Disease and Allied Cond	One primary only	September	No/Unknown
1836527	1990	Female	40	White	Divorced	Sigmoid Colon	8140/3: Adenocarcinoma, NOS	C18.7-Sigmoid colon	Moderately differentiated; Grade II	30	Blank(s)	Blank(s)	T3	Blank(s)	Blank(s)	N3	Blank(s)	Blank(s)	Blank(s)	Blank(s)	Blank(s)	Blank(s)	Blank(s)	Blank(s)	Blank(s)	Blank(s)	6	1	Blank(s)	No radiation and/or cancer-directed surgery	None	Dead (attributable to this cancer dx)	Alive or dead due to cancer	21	Colon excluding Rectum	One primary only	December	Yes
1836597	1991	Female	64	Black	Married (including common law)	Rectum	8140/3: Adenocarcinoma, NOS	C20.9-Rectum, NOS	Moderately differentiated; Grade II	30	Blank(s)	Blank(s)	T3	Blank(s)	Blank(s)	N2	Blank(s)	Blank(s)	Blank(s)	Blank(s)	Blank(s)	Blank(s)	Blank(s)	Blank(s)	Blank(s)	Blank(s)	12	4	Blank(s)	Radiation after surgery	Beam radiation	Dead (attributable to this cancer dx)	Alive or dead due to cancer	40	Rectum and Rectosigmoid Junction	One primary only	April	Yes
1836687	1990	Male	76	White	Married (including common law)	Cecum	8140/3: Adenocarcinoma, NOS	C18.0-Cecum	Well differentiated; Grade I	10	Blank(s)	Blank(s)	T2	Blank(s)	Blank(s)	N0	Blank(s)	Blank(s)	Blank(s)	Blank(s)	Blank(s)	Blank(s)	Blank(s)	Blank(s)	Blank(s)	Blank(s)	10	0	Blank(s)	No radiation and/or cancer-directed surgery	None	Dead (attributable to this cancer dx)	Alive or dead due to cancer	29	Colon excluding Rectum	One primary only	October	Yes
1836704	1990	Male	54	White	Married (including common law)	Descending Colon	8140/3: Adenocarcinoma, NOS	C18.6-Descending colon	Well differentiated; Grade I	10	Blank(s)	Blank(s)	T1	Blank(s)	Blank(s)	N0	Blank(s)	Blank(s)	Blank(s)	Blank(s)	Blank(s)	Blank(s)	Blank(s)	Blank(s)	Blank(s)	Blank(s)	3	0	Blank(s)	No radiation and/or cancer-directed surgery	None	Alive or dead of other cause	Alive or dead due to cancer	278	Alive	One primary only	October	No/Unknown
1836716	1988	Male	63	White	Married (including common law)	Rectum	8140/3: Adenocarcinoma, NOS	C20.9-Rectum, NOS	Moderately differentiated; Grade II	20	Blank(s)	Blank(s)	T3	Blank(s)	Blank(s)	N0	Blank(s)	Blank(s)	Blank(s)	Blank(s)	Blank(s)	Blank(s)	Blank(s)	Blank(s)	Blank(s)	Blank(s)	1	0	Blank(s)	No radiation and/or cancer-directed surgery	None	Alive or dead of other cause	Dead (attributable to causes other than this cancer dx)	163	Cerebrovascular Diseases	One primary only	September	No/Unknown
1836756	1991	Male	58	White	Married (including common law)	Cecum	8140/3: Adenocarcinoma, NOS	C18.0-Cecum	Moderately differentiated; Grade II	30	Blank(s)	Blank(s)	T4	Blank(s)	Blank(s)	N1	Blank(s)	Blank(s)	Blank(s)	Blank(s)	Blank(s)	Blank(s)	Blank(s)	Blank(s)	Blank(s)	Blank(s)	4	2	Blank(s)	No radiation and/or cancer-directed surgery	None	Dead (attributable to this cancer dx)	Alive or dead due to cancer	21	Colon excluding Rectum	One primary only	March	Yes
1836765	1991	Male	77	Asian or Pacific Islander	Married (including common law)	Rectum	8140/3: Adenocarcinoma, NOS	C20.9-Rectum, NOS	Moderately differentiated; Grade II	10	Blank(s)	Blank(s)	T2	Blank(s)	Blank(s)	N0	Blank(s)	Blank(s)	Blank(s)	Blank(s)	Blank(s)	Blank(s)	Blank(s)	Blank(s)	Blank(s)	Blank(s)	5	0	Blank(s)	No radiation and/or cancer-directed surgery	None	Alive or dead of other cause	Dead (attributable to causes other than this cancer dx)	91	Pneumonia and Influenza	One primary only	April	No/Unknown
1836812	1989	Female	71	White	Married (including common law)	Sigmoid Colon	8140/3: Adenocarcinoma, NOS	C18.7-Sigmoid colon	Moderately differentiated; Grade II	10	Blank(s)	Blank(s)	T2	Blank(s)	Blank(s)	N0	Blank(s)	Blank(s)	Blank(s)	Blank(s)	Blank(s)	Blank(s)	Blank(s)	Blank(s)	Blank(s)	Blank(s)	5	0	Blank(s)	No radiation and/or cancer-directed surgery	None	Alive or dead of other cause	Dead (attributable to causes other than this cancer dx)	146	Other Cause of Death	One primary only	May	No/Unknown
1836937	1988	Female	77	Black	Widowed	Rectum	8140/3: Adenocarcinoma, NOS	C20.9-Rectum, NOS	Moderately differentiated; Grade II	20	Blank(s)	Blank(s)	T3	Blank(s)	Blank(s)	N0	Blank(s)	Blank(s)	Blank(s)	Blank(s)	Blank(s)	Blank(s)	Blank(s)	Blank(s)	Blank(s)	Blank(s)	8	0	Blank(s)	No radiation and/or cancer-directed surgery	None	Alive or dead of other cause	Dead (attributable to causes other than this cancer dx)	69	Diabetes Mellitus	One primary only	March	No/Unknown
1836990	1988	Male	66	White	Married (including common law)	Sigmoid Colon	8480/3: Mucinous adenocarcinoma	C18.7-Sigmoid colon	Moderately differentiated; Grade II	30	Blank(s)	Blank(s)	T3	Blank(s)	Blank(s)	N1	Blank(s)	Blank(s)	Blank(s)	Blank(s)	Blank(s)	Blank(s)	Blank(s)	Blank(s)	Blank(s)	Blank(s)	2	1	Blank(s)	No radiation and/or cancer-directed surgery	None	Alive or dead of other cause	Dead (attributable to causes other than this cancer dx)	26	Accidents and Adverse Effects	One primary only	November	No/Unknown
1837033	1990	Female	74	White	Widowed	Sigmoid Colon	8140/3: Adenocarcinoma, NOS	C18.7-Sigmoid colon	Moderately differentiated; Grade II	20	Blank(s)	Blank(s)	T3	Blank(s)	Blank(s)	N0	Blank(s)	Blank(s)	Blank(s)	Blank(s)	Blank(s)	Blank(s)	Blank(s)	Blank(s)	Blank(s)	Blank(s)	1	0	Blank(s)	No radiation and/or cancer-directed surgery	None	Dead (attributable to this cancer dx)	Alive or dead due to cancer	10	Colon excluding Rectum	One primary only	November	Yes
1837178	1988	Male	51	Black	Married (including common law)	Rectum	8140/3: Adenocarcinoma, NOS	C20.9-Rectum, NOS	Moderately differentiated; Grade II	30	Blank(s)	Blank(s)	T3	Blank(s)	Blank(s)	N1	Blank(s)	Blank(s)	Blank(s)	Blank(s)	Blank(s)	Blank(s)	Blank(s)	Blank(s)	Blank(s)	Blank(s)	8	2	Blank(s)	Radiation after surgery	Beam radiation	Alive or dead of other cause	Dead (attributable to causes other than this cancer dx)	38	Diabetes Mellitus	One primary only	August	No/Unknown
1837228	1988	Male	56	White	Married (including common law)	Rectum	8140/3: Adenocarcinoma, NOS	C20.9-Rectum, NOS	Poorly differentiated; Grade III	30	Blank(s)	Blank(s)	T2	Blank(s)	Blank(s)	N1	Blank(s)	Blank(s)	Blank(s)	Blank(s)	Blank(s)	Blank(s)	Blank(s)	Blank(s)	Blank(s)	Blank(s)	2	1	Blank(s)	Radiation after surgery	Beam radiation	Alive or dead of other cause	Alive or dead due to cancer	304	Alive	One primary only	August	Yes
1837627	1990	Female	78	White	Married (including common law)	Ascending Colon	8140/3: Adenocarcinoma, NOS	C18.2-Ascending colon	Moderately differentiated; Grade II	30	Blank(s)	Blank(s)	T3	Blank(s)	Blank(s)	N1	Blank(s)	Blank(s)	Blank(s)	Blank(s)	Blank(s)	Blank(s)	Blank(s)	Blank(s)	Blank(s)	Blank(s)	25	3	Blank(s)	No radiation and/or cancer-directed surgery	None	Dead (attributable to this cancer dx)	Alive or dead due to cancer	23	Colon excluding Rectum	One primary only	March	Yes
1837701	1990	Male	70	Black	Single (never married)	Hepatic Flexure	8140/3: Adenocarcinoma, NOS	C18.3-Hepatic flexure of colon	Moderately differentiated; Grade II	20	Blank(s)	Blank(s)	T3	Blank(s)	Blank(s)	N0	Blank(s)	Blank(s)	Blank(s)	Blank(s)	Blank(s)	Blank(s)	Blank(s)	Blank(s)	Blank(s)	Blank(s)	18	0	Blank(s)	No radiation and/or cancer-directed surgery	None	Alive or dead of other cause	Dead (attributable to causes other than this cancer dx)	54	Diseases of Heart	One primary only	August	No/Unknown
1837711	1990	Male	79	White	Unknown	Hepatic Flexure	8140/3: Adenocarcinoma, NOS	C18.3-Hepatic flexure of colon	Moderately differentiated; Grade II	20	Blank(s)	Blank(s)	T3	Blank(s)	Blank(s)	N0	Blank(s)	Blank(s)	Blank(s)	Blank(s)	Blank(s)	Blank(s)	Blank(s)	Blank(s)	Blank(s)	Blank(s)	14	0	Blank(s)	No radiation and/or cancer-directed surgery	None	Alive or dead of other cause	Dead (attributable to causes other than this cancer dx)	215	Alzheimers (ICD-9 and 10 only)	One primary only	April	No/Unknown
1837784	1988	Male	70	Asian or Pacific Islander	Married (including common law)	Ascending Colon	8140/3: Adenocarcinoma, NOS	C18.2-Ascending colon	Moderately differentiated; Grade II	10	Blank(s)	Blank(s)	T2	Blank(s)	Blank(s)	N0	Blank(s)	Blank(s)	Blank(s)	Blank(s)	Blank(s)	Blank(s)	Blank(s)	Blank(s)	Blank(s)	Blank(s)	7	0	Blank(s)	No radiation and/or cancer-directed surgery	None	Alive or dead of other cause	Dead (attributable to causes other than this cancer dx)	101	Diseases of Heart	One primary only	June	No/Unknown
1837819	1991	Female	40	White	Married (including common law)	Rectum	8140/3: Adenocarcinoma, NOS	C20.9-Rectum, NOS	Moderately differentiated; Grade II	20	Blank(s)	Blank(s)	T3	Blank(s)	Blank(s)	N0	Blank(s)	Blank(s)	Blank(s)	Blank(s)	Blank(s)	Blank(s)	Blank(s)	Blank(s)	Blank(s)	Blank(s)	8	0	Blank(s)	Radiation after surgery	Beam radiation	Alive or dead of other cause	Alive or dead due to cancer	272	Alive	One primary only	April	Yes
1837884	1988	Male	69	White	Married (including common law)	Sigmoid Colon	8140/3: Adenocarcinoma, NOS	C18.7-Sigmoid colon	Moderately differentiated; Grade II	30	Blank(s)	Blank(s)	T3	Blank(s)	Blank(s)	N1	Blank(s)	Blank(s)	Blank(s)	Blank(s)	Blank(s)	Blank(s)	Blank(s)	Blank(s)	Blank(s)	Blank(s)	27	2	Blank(s)	No radiation and/or cancer-directed surgery	None	Dead (attributable to this cancer dx)	Alive or dead due to cancer	5	Colon excluding Rectum	One primary only	January	No/Unknown
1838110	1988	Male	74	Asian or Pacific Islander	Divorced	Ascending Colon	8140/3: Adenocarcinoma, NOS	C18.2-Ascending colon	Moderately differentiated; Grade II	20	Blank(s)	Blank(s)	T4	Blank(s)	Blank(s)	N0	Blank(s)	Blank(s)	Blank(s)	Blank(s)	Blank(s)	Blank(s)	Blank(s)	Blank(s)	Blank(s)	Blank(s)	9	0	Blank(s)	No radiation and/or cancer-directed surgery	None	Alive or dead of other cause	Dead (attributable to causes other than this cancer dx)	31	Pneumonia and Influenza	One primary only	September	No/Unknown
1838120	1990	Female	54	White	Divorced	Sigmoid Colon	8140/3: Adenocarcinoma, NOS	C18.7-Sigmoid colon	Moderately differentiated; Grade II	20	Blank(s)	Blank(s)	T3	Blank(s)	Blank(s)	N0	Blank(s)	Blank(s)	Blank(s)	Blank(s)	Blank(s)	Blank(s)	Blank(s)	Blank(s)	Blank(s)	Blank(s)	12	0	Blank(s)	No radiation and/or cancer-directed surgery	None	Alive or dead of other cause	Alive or dead due to cancer	280	Alive	One primary only	August	No/Unknown
1838144	1990	Female	69	White	Married (including common law)	Sigmoid Colon	8140/3: Adenocarcinoma, NOS	C18.7-Sigmoid colon	Moderately differentiated; Grade II	30	Blank(s)	Blank(s)	T3	Blank(s)	Blank(s)	N2	Blank(s)	Blank(s)	Blank(s)	Blank(s)	Blank(s)	Blank(s)	Blank(s)	Blank(s)	Blank(s)	Blank(s)	6	4	Blank(s)	No radiation and/or cancer-directed surgery	None	Alive or dead of other cause	Dead (attributable to causes other than this cancer dx)	185	Alzheimers (ICD-9 and 10 only)	One primary only	September	Yes
1838234	1991	Male	66	White	Widowed	Descending Colon	8140/3: Adenocarcinoma, NOS	C18.6-Descending colon	Well differentiated; Grade I	30	Blank(s)	Blank(s)	T3	Blank(s)	Blank(s)	N1	Blank(s)	Blank(s)	Blank(s)	Blank(s)	Blank(s)	Blank(s)	Blank(s)	Blank(s)	Blank(s)	Blank(s)	2	1	Blank(s)	No radiation and/or cancer-directed surgery	None	Alive or dead of other cause	Dead (attributable to causes other than this cancer dx)	19	Diseases of Heart	One primary only	June	Yes
1838292	1988	Male	71	Black	Single (never married)	Ascending Colon	8140/3: Adenocarcinoma, NOS	C18.2-Ascending colon	Poorly differentiated; Grade III	30	Blank(s)	Blank(s)	T3	Blank(s)	Blank(s)	N2	Blank(s)	Blank(s)	Blank(s)	Blank(s)	Blank(s)	Blank(s)	Blank(s)	Blank(s)	Blank(s)	Blank(s)	19	11	Blank(s)	No radiation and/or cancer-directed surgery	None	Alive or dead of other cause	Dead (attributable to causes other than this cancer dx)	137	Diseases of Heart	One primary only	February	No/Unknown
1838611	1988	Female	70	White	Married (including common law)	Sigmoid Colon	8140/3: Adenocarcinoma, NOS	C18.7-Sigmoid colon	Moderately differentiated; Grade II	10	Blank(s)	Blank(s)	T2	Blank(s)	Blank(s)	N0	Blank(s)	Blank(s)	Blank(s)	Blank(s)	Blank(s)	Blank(s)	Blank(s)	Blank(s)	Blank(s)	Blank(s)	9	0	Blank(s)	No radiation and/or cancer-directed surgery	None	Alive or dead of other cause	Dead (attributable to causes other than this cancer dx)	254	State DC not available or state DC available but no COD	One primary only	December	No/Unknown
1838701	1991	Male	75	White	Married (including common law)	Splenic Flexure	8140/3: Adenocarcinoma, NOS	C18.5-Splenic flexure of colon	Moderately differentiated; Grade II	30	Blank(s)	Blank(s)	T3	Blank(s)	Blank(s)	N1	Blank(s)	Blank(s)	Blank(s)	Blank(s)	Blank(s)	Blank(s)	Blank(s)	Blank(s)	Blank(s)	Blank(s)	11	1	Blank(s)	No radiation and/or cancer-directed surgery	None	Alive or dead of other cause	Dead (attributable to causes other than this cancer dx)	144	Diabetes Mellitus	One primary only	April	No/Unknown
1838726	1990	Male	51	White	Married (including common law)	Sigmoid Colon	8140/3: Adenocarcinoma, NOS	C18.7-Sigmoid colon	Well differentiated; Grade I	20	Blank(s)	Blank(s)	T3	Blank(s)	Blank(s)	N0	Blank(s)	Blank(s)	Blank(s)	Blank(s)	Blank(s)	Blank(s)	Blank(s)	Blank(s)	Blank(s)	Blank(s)	9	0	Blank(s)	No radiation and/or cancer-directed surgery	None	Alive or dead of other cause	Alive or dead due to cancer	280	Alive	One primary only	August	Yes
1838883	1991	Male	73	Asian or Pacific Islander	Married (including common law)	Sigmoid Colon	8140/3: Adenocarcinoma, NOS	C18.7-Sigmoid colon	Moderately differentiated; Grade II	30	Blank(s)	Blank(s)	T3	Blank(s)	Blank(s)	N1	Blank(s)	Blank(s)	Blank(s)	Blank(s)	Blank(s)	Blank(s)	Blank(s)	Blank(s)	Blank(s)	Blank(s)	18	1	Blank(s)	No radiation and/or cancer-directed surgery	None	Alive or dead of other cause	Dead (attributable to causes other than this cancer dx)	162	Other Cause of Death	One primary only	February	Yes
1838908	1990	Female	53	White	Widowed	Cecum	8140/3: Adenocarcinoma, NOS	C18.0-Cecum	Moderately differentiated; Grade II	30	Blank(s)	Blank(s)	T3	Blank(s)	Blank(s)	N1	Blank(s)	Blank(s)	Blank(s)	Blank(s)	Blank(s)	Blank(s)	Blank(s)	Blank(s)	Blank(s)	Blank(s)	11	3	Blank(s)	No radiation and/or cancer-directed surgery	None	Alive or dead of other cause	Alive or dead due to cancer	277	Alive	One primary only	November	Yes
1838917	1990	Female	79	White	Married (including common law)	Descending Colon	8140/3: Adenocarcinoma, NOS	C18.6-Descending colon	Moderately differentiated; Grade II	20	Blank(s)	Blank(s)	T3	Blank(s)	Blank(s)	N0	Blank(s)	Blank(s)	Blank(s)	Blank(s)	Blank(s)	Blank(s)	Blank(s)	Blank(s)	Blank(s)	Blank(s)	5	0	Blank(s)	No radiation and/or cancer-directed surgery	None	Alive or dead of other cause	Dead (attributable to causes other than this cancer dx)	129	Other Cause of Death	One primary only	August	No/Unknown
1839026	1991	Male	67	White	Divorced	Rectum	8140/3: Adenocarcinoma, NOS	C20.9-Rectum, NOS	Moderately differentiated; Grade II	20	Blank(s)	Blank(s)	T3	Blank(s)	Blank(s)	N0	Blank(s)	Blank(s)	Blank(s)	Blank(s)	Blank(s)	Blank(s)	Blank(s)	Blank(s)	Blank(s)	Blank(s)	13	0	Blank(s)	No radiation and/or cancer-directed surgery	None	Dead (attributable to this cancer dx)	Alive or dead due to cancer	65	Rectum and Rectosigmoid Junction	One primary only	April	No/Unknown
1839074	1988	Female	80	White	Married (including common law)	Ascending Colon	8140/3: Adenocarcinoma, NOS	C18.2-Ascending colon	Moderately differentiated; Grade II	20	Blank(s)	Blank(s)	T3	Blank(s)	Blank(s)	N0	Blank(s)	Blank(s)	Blank(s)	Blank(s)	Blank(s)	Blank(s)	Blank(s)	Blank(s)	Blank(s)	Blank(s)	27	0	Blank(s)	No radiation and/or cancer-directed surgery	None	Alive or dead of other cause	Dead (attributable to causes other than this cancer dx)	109	Other Cause of Death	One primary only	October	No/Unknown
1839101	1988	Female	65	White	Divorced	Rectosigmoid Junction	8140/3: Adenocarcinoma, NOS	C19.9-Rectosigmoid junction	Moderately differentiated; Grade II	20	Blank(s)	Blank(s)	T3	Blank(s)	Blank(s)	N0	Blank(s)	Blank(s)	Blank(s)	Blank(s)	Blank(s)	Blank(s)	Blank(s)	Blank(s)	Blank(s)	Blank(s)	21	0	Blank(s)	No radiation and/or cancer-directed surgery	None	Dead (attributable to this cancer dx)	Alive or dead due to cancer	176	Esophagus	One primary only	August	No/Unknown
1839561	1990	Male	58	White	Single (never married)	Sigmoid Colon	8140/3: Adenocarcinoma, NOS	C18.7-Sigmoid colon	Moderately differentiated; Grade II	20	Blank(s)	Blank(s)	T4	Blank(s)	Blank(s)	N0	Blank(s)	Blank(s)	Blank(s)	Blank(s)	Blank(s)	Blank(s)	Blank(s)	Blank(s)	Blank(s)	Blank(s)	9	0	Blank(s)	No radiation and/or cancer-directed surgery	None	Alive or dead of other cause	Dead (attributable to causes other than this cancer dx)	1	Diseases of Heart	One primary only	November	No/Unknown
1839640	1989	Female	61	Asian or Pacific Islander	Married (including common law)	Sigmoid Colon	8140/3: Adenocarcinoma, NOS	C18.7-Sigmoid colon	Moderately differentiated; Grade II	10	Blank(s)	Blank(s)	T1	Blank(s)	Blank(s)	N0	Blank(s)	Blank(s)	Blank(s)	Blank(s)	Blank(s)	Blank(s)	Blank(s)	Blank(s)	Blank(s)	Blank(s)	3	0	Blank(s)	No radiation and/or cancer-directed surgery	None	Alive or dead of other cause	Dead (attributable to causes other than this cancer dx)	134	Chronic Liver Disease and Cirrhosis	One primary only	May	No/Unknown
1839812	1988	Male	78	White	Married (including common law)	Transverse Colon	8140/3: Adenocarcinoma, NOS	C18.4-Transverse colon	Moderately differentiated; Grade II	20	Blank(s)	Blank(s)	T4	Blank(s)	Blank(s)	N0	Blank(s)	Blank(s)	Blank(s)	Blank(s)	Blank(s)	Blank(s)	Blank(s)	Blank(s)	Blank(s)	Blank(s)	3	0	Blank(s)	No radiation and/or cancer-directed surgery	None	Dead (attributable to this cancer dx)	Alive or dead due to cancer	23	Colon excluding Rectum	One primary only	May	No/Unknown
1839957	1991	Male	45	White	Married (including common law)	Rectosigmoid Junction	8140/3: Adenocarcinoma, NOS	C19.9-Rectosigmoid junction	Poorly differentiated; Grade III	20	Blank(s)	Blank(s)	T3	Blank(s)	Blank(s)	N0	Blank(s)	Blank(s)	Blank(s)	Blank(s)	Blank(s)	Blank(s)	Blank(s)	Blank(s)	Blank(s)	Blank(s)	3	0	Blank(s)	Radiation after surgery	Beam radiation	Dead (attributable to this cancer dx)	Alive or dead due to cancer	86	Colon excluding Rectum	One primary only	May	Yes
1839974	1989	Female	71	White	Widowed	Sigmoid Colon	8140/3: Adenocarcinoma, NOS	C18.7-Sigmoid colon	Moderately differentiated; Grade II	20	Blank(s)	Blank(s)	T3	Blank(s)	Blank(s)	N0	Blank(s)	Blank(s)	Blank(s)	Blank(s)	Blank(s)	Blank(s)	Blank(s)	Blank(s)	Blank(s)	Blank(s)	3	0	Blank(s)	No radiation and/or cancer-directed surgery	None	Alive or dead of other cause	Dead (attributable to causes other than this cancer dx)	224	Cerebrovascular Diseases	One primary only	November	No/Unknown
1840033	1988	Female	64	Asian or Pacific Islander	Widowed	Rectum	8140/3: Adenocarcinoma, NOS	C20.9-Rectum, NOS	Moderately differentiated; Grade II	20	Blank(s)	Blank(s)	T3	Blank(s)	Blank(s)	N0	Blank(s)	Blank(s)	Blank(s)	Blank(s)	Blank(s)	Blank(s)	Blank(s)	Blank(s)	Blank(s)	Blank(s)	5	0	Blank(s)	No radiation and/or cancer-directed surgery	None	Dead (attributable to this cancer dx)	Alive or dead due to cancer	52	Colon excluding Rectum	One primary only	November	No/Unknown
1840180	1990	Male	74	White	Single (never married)	Sigmoid Colon	8140/3: Adenocarcinoma, NOS	C18.7-Sigmoid colon	Poorly differentiated; Grade III	30	Blank(s)	Blank(s)	T3	Blank(s)	Blank(s)	N2	Blank(s)	Blank(s)	Blank(s)	Blank(s)	Blank(s)	Blank(s)	Blank(s)	Blank(s)	Blank(s)	Blank(s)	10	7	Blank(s)	No radiation and/or cancer-directed surgery	None	Dead (attributable to this cancer dx)	Alive or dead due to cancer	39	Colon excluding Rectum	One primary only	August	No/Unknown
1840305	1991	Female	76	White	Married (including common law)	Rectum	8140/3: Adenocarcinoma, NOS	C20.9-Rectum, NOS	Moderately differentiated; Grade II	10	Blank(s)	Blank(s)	T2	Blank(s)	Blank(s)	N0	Blank(s)	Blank(s)	Blank(s)	Blank(s)	Blank(s)	Blank(s)	Blank(s)	Blank(s)	Blank(s)	Blank(s)	6	0	Blank(s)	No radiation and/or cancer-directed surgery	None	Alive or dead of other cause	Dead (attributable to causes other than this cancer dx)	25	Cerebrovascular Diseases	One primary only	April	No/Unknown
1840375	1989	Female	66	Asian or Pacific Islander	Married (including common law)	Sigmoid Colon	8140/3: Adenocarcinoma, NOS	C18.7-Sigmoid colon	Moderately differentiated; Grade II	20	Blank(s)	Blank(s)	T3	Blank(s)	Blank(s)	N0	Blank(s)	Blank(s)	Blank(s)	Blank(s)	Blank(s)	Blank(s)	Blank(s)	Blank(s)	Blank(s)	Blank(s)	6	0	Blank(s)	No radiation and/or cancer-directed surgery	None	Dead (attributable to this cancer dx)	Alive or dead due to cancer	33	Miscellaneous Malignant Cancer	One primary only	May	No/Unknown
1840432	1990	Female	79	Asian or Pacific Islander	Married (including common law)	Cecum	8140/3: Adenocarcinoma, NOS	C18.0-Cecum	Poorly differentiated; Grade III	30	Blank(s)	Blank(s)	T3	Blank(s)	Blank(s)	N3	Blank(s)	Blank(s)	Blank(s)	Blank(s)	Blank(s)	Blank(s)	Blank(s)	Blank(s)	Blank(s)	Blank(s)	98	97	Blank(s)	No radiation and/or cancer-directed surgery	None	Alive or dead of other cause	Dead (attributable to causes other than this cancer dx)	113	Pneumonia and Influenza	One primary only	May	No/Unknown
1840625	1991	Female	80	White	Married (including common law)	Sigmoid Colon	8480/3: Mucinous adenocarcinoma	C18.7-Sigmoid colon	Moderately differentiated; Grade II	20	Blank(s)	Blank(s)	T3	Blank(s)	Blank(s)	N0	Blank(s)	Blank(s)	Blank(s)	Blank(s)	Blank(s)	Blank(s)	Blank(s)	Blank(s)	Blank(s)	Blank(s)	98	0	Blank(s)	No radiation and/or cancer-directed surgery	None	Alive or dead of other cause	Dead (attributable to causes other than this cancer dx)	253	Other Cause of Death	One primary only	April	No/Unknown
1840632	1989	Male	28	White	Unknown	Transverse Colon	8480/3: Mucinous adenocarcinoma	C18.4-Transverse colon	Moderately differentiated; Grade II	10	Blank(s)	Blank(s)	T2	Blank(s)	Blank(s)	N0	Blank(s)	Blank(s)	Blank(s)	Blank(s)	Blank(s)	Blank(s)	Blank(s)	Blank(s)	Blank(s)	Blank(s)	5	0	Blank(s)	No radiation and/or cancer-directed surgery	None	Dead (attributable to this cancer dx)	Alive or dead due to cancer	101	Colon excluding Rectum	One primary only	March	Yes
1840742	1991	Female	76	White	Widowed	Hepatic Flexure	8140/3: Adenocarcinoma, NOS	C18.3-Hepatic flexure of colon	Moderately differentiated; Grade II	30	Blank(s)	Blank(s)	T3	Blank(s)	Blank(s)	N1	Blank(s)	Blank(s)	Blank(s)	Blank(s)	Blank(s)	Blank(s)	Blank(s)	Blank(s)	Blank(s)	Blank(s)	6	1	Blank(s)	No radiation and/or cancer-directed surgery	None	Dead (attributable to this cancer dx)	Alive or dead due to cancer	37	Colon excluding Rectum	One primary only	May	Yes
1840801	1989	Male	74	Black	Married (including common law)	Ascending Colon	8140/3: Adenocarcinoma, NOS	C18.2-Ascending colon	Moderately differentiated; Grade II	20	Blank(s)	Blank(s)	T3	Blank(s)	Blank(s)	N0	Blank(s)	Blank(s)	Blank(s)	Blank(s)	Blank(s)	Blank(s)	Blank(s)	Blank(s)	Blank(s)	Blank(s)	16	0	Blank(s)	No radiation and/or cancer-directed surgery	None	Dead (attributable to this cancer dx)	Alive or dead due to cancer	1	Colon excluding Rectum	One primary only	October	No/Unknown
1840861	1990	Male	77	White	Married (including common law)	Transverse Colon	8140/3: Adenocarcinoma, NOS	C18.4-Transverse colon	Moderately differentiated; Grade II	20	Blank(s)	Blank(s)	T3	Blank(s)	Blank(s)	N0	Blank(s)	Blank(s)	Blank(s)	Blank(s)	Blank(s)	Blank(s)	Blank(s)	Blank(s)	Blank(s)	Blank(s)	2	0	Blank(s)	No radiation and/or cancer-directed surgery	None	Alive or dead of other cause	Dead (attributable to causes other than this cancer dx)	1	Diseases of Heart	One primary only	December	No/Unknown
1840876	1990	Female	72	Asian or Pacific Islander	Married (including common law)	Rectosigmoid Junction	8140/3: Adenocarcinoma, NOS	C19.9-Rectosigmoid junction	Moderately differentiated; Grade II	20	Blank(s)	Blank(s)	T3	Blank(s)	Blank(s)	N0	Blank(s)	Blank(s)	Blank(s)	Blank(s)	Blank(s)	Blank(s)	Blank(s)	Blank(s)	Blank(s)	Blank(s)	12	0	Blank(s)	No radiation and/or cancer-directed surgery	None	Alive or dead of other cause	Dead (attributable to causes other than this cancer dx)	257	Hypertension without Heart Disease	One primary only	July	No/Unknown
1840884	1990	Male	61	White	Married (including common law)	Rectosigmoid Junction	8140/3: Adenocarcinoma, NOS	C19.9-Rectosigmoid junction	Moderately differentiated; Grade II	20	Blank(s)	Blank(s)	T3	Blank(s)	Blank(s)	N0	Blank(s)	Blank(s)	Blank(s)	Blank(s)	Blank(s)	Blank(s)	Blank(s)	Blank(s)	Blank(s)	Blank(s)	4	0	Blank(s)	No radiation and/or cancer-directed surgery	None	Alive or dead of other cause	Alive or dead due to cancer	279	Alive	One primary only	September	Yes
1840956	1988	Female	75	White	Married (including common law)	Rectum	8140/3: Adenocarcinoma, NOS	C20.9-Rectum, NOS	Moderately differentiated; Grade II	30	Blank(s)	Blank(s)	T4	Blank(s)	Blank(s)	N1	Blank(s)	Blank(s)	Blank(s)	Blank(s)	Blank(s)	Blank(s)	Blank(s)	Blank(s)	Blank(s)	Blank(s)	2	1	Blank(s)	No radiation and/or cancer-directed surgery	None	Dead (attributable to this cancer dx)	Alive or dead due to cancer	15	Colon excluding Rectum	One primary only	May	No/Unknown
1840960	1989	Female	52	Asian or Pacific Islander	Married (including common law)	Sigmoid Colon	8140/3: Adenocarcinoma, NOS	C18.7-Sigmoid colon	Moderately differentiated; Grade II	20	Blank(s)	Blank(s)	T3	Blank(s)	Blank(s)	N0	Blank(s)	Blank(s)	Blank(s)	Blank(s)	Blank(s)	Blank(s)	Blank(s)	Blank(s)	Blank(s)	Blank(s)	98	0	Blank(s)	No radiation and/or cancer-directed surgery	None	Dead (attributable to this cancer dx)	Alive or dead due to cancer	72	Colon excluding Rectum	One primary only	November	No/Unknown
1841032	1989	Male	43	Asian or Pacific Islander	Married (including common law)	Ascending Colon	8140/3: Adenocarcinoma, NOS	C18.2-Ascending colon	Moderately differentiated; Grade II	20	Blank(s)	Blank(s)	T3	Blank(s)	Blank(s)	N0	Blank(s)	Blank(s)	Blank(s)	Blank(s)	Blank(s)	Blank(s)	Blank(s)	Blank(s)	Blank(s)	Blank(s)	12	0	Blank(s)	No radiation and/or cancer-directed surgery	None	Alive or dead of other cause	Dead (attributable to causes other than this cancer dx)	27	State DC not available or state DC available but no COD	One primary only	March	Yes
1841103	1989	Male	51	Asian or Pacific Islander	Married (including common law)	Sigmoid Colon	8140/3: Adenocarcinoma, NOS	C18.7-Sigmoid colon	Well differentiated; Grade I	20	Blank(s)	Blank(s)	T3	Blank(s)	Blank(s)	N0	Blank(s)	Blank(s)	Blank(s)	Blank(s)	Blank(s)	Blank(s)	Blank(s)	Blank(s)	Blank(s)	Blank(s)	2	0	Blank(s)	No radiation and/or cancer-directed surgery	None	Dead (attributable to this cancer dx)	Alive or dead due to cancer	10	Colon excluding Rectum	One primary only	February	No/Unknown
1841305	1989	Male	48	Asian or Pacific Islander	Married (including common law)	Rectosigmoid Junction	8140/3: Adenocarcinoma, NOS	C19.9-Rectosigmoid junction	Moderately differentiated; Grade II	20	Blank(s)	Blank(s)	T4	Blank(s)	Blank(s)	N0	Blank(s)	Blank(s)	Blank(s)	Blank(s)	Blank(s)	Blank(s)	Blank(s)	Blank(s)	Blank(s)	Blank(s)	5	0	Blank(s)	Radiation after surgery	Beam radiation	Dead (attributable to this cancer dx)	Alive or dead due to cancer	68	Rectum and Rectosigmoid Junction	One primary only	March	No/Unknown
1841482	1990	Female	73	White	Married (including common law)	Hepatic Flexure	8140/3: Adenocarcinoma, NOS	C18.3-Hepatic flexure of colon	Moderately differentiated; Grade II	30	Blank(s)	Blank(s)	T3	Blank(s)	Blank(s)	N1	Blank(s)	Blank(s)	Blank(s)	Blank(s)	Blank(s)	Blank(s)	Blank(s)	Blank(s)	Blank(s)	Blank(s)	12	2	Blank(s)	No radiation and/or cancer-directed surgery	None	Alive or dead of other cause	Dead (attributable to causes other than this cancer dx)	65	Cerebrovascular Diseases	One primary only	August	No/Unknown
1841483	1989	Female	55	White	Married (including common law)	Rectum	8140/3: Adenocarcinoma, NOS	C20.9-Rectum, NOS	Moderately differentiated; Grade II	20	Blank(s)	Blank(s)	T3	Blank(s)	Blank(s)	N0	Blank(s)	Blank(s)	Blank(s)	Blank(s)	Blank(s)	Blank(s)	Blank(s)	Blank(s)	Blank(s)	Blank(s)	4	0	Blank(s)	Radiation after surgery	Beam radiation	Dead (attributable to this cancer dx)	Alive or dead due to cancer	131	Rectum and Rectosigmoid Junction	One primary only	April	No/Unknown
1841709	1990	Male	58	White	Married (including common law)	Sigmoid Colon	8140/3: Adenocarcinoma, NOS	C18.7-Sigmoid colon	Moderately differentiated; Grade II	20	Blank(s)	Blank(s)	T3	Blank(s)	Blank(s)	N0	Blank(s)	Blank(s)	Blank(s)	Blank(s)	Blank(s)	Blank(s)	Blank(s)	Blank(s)	Blank(s)	Blank(s)	6	0	Blank(s)	No radiation and/or cancer-directed surgery	None	Alive or dead of other cause	Alive or dead due to cancer	280	Alive	One primary only	August	Yes
1841713	1989	Female	77	White	Married (including common law)	Rectum	8140/3: Adenocarcinoma, NOS	C20.9-Rectum, NOS	Poorly differentiated; Grade III	20	Blank(s)	Blank(s)	T3	Blank(s)	Blank(s)	N0	Blank(s)	Blank(s)	Blank(s)	Blank(s)	Blank(s)	Blank(s)	Blank(s)	Blank(s)	Blank(s)	Blank(s)	12	0	Blank(s)	No radiation and/or cancer-directed surgery	None	Alive or dead of other cause	Dead (attributable to causes other than this cancer dx)	25	Cerebrovascular Diseases	One primary only	May	No/Unknown
1841768	1991	Female	67	White	Married (including common law)	Sigmoid Colon	8480/3: Mucinous adenocarcinoma	C18.7-Sigmoid colon	Moderately differentiated; Grade II	20	Blank(s)	Blank(s)	T4	Blank(s)	Blank(s)	N0	Blank(s)	Blank(s)	Blank(s)	Blank(s)	Blank(s)	Blank(s)	Blank(s)	Blank(s)	Blank(s)	Blank(s)	9	0	Blank(s)	No radiation and/or cancer-directed surgery	None	Dead (attributable to this cancer dx)	Alive or dead due to cancer	17	Colon excluding Rectum	One primary only	April	No/Unknown
1841792	1991	Female	63	Asian or Pacific Islander	Married (including common law)	Cecum	8140/3: Adenocarcinoma, NOS	C18.0-Cecum	Moderately differentiated; Grade II	10	Blank(s)	Blank(s)	T1	Blank(s)	Blank(s)	N0	Blank(s)	Blank(s)	Blank(s)	Blank(s)	Blank(s)	Blank(s)	Blank(s)	Blank(s)	Blank(s)	Blank(s)	5	0	Blank(s)	No radiation and/or cancer-directed surgery	None	Alive or dead of other cause	Alive or dead due to cancer	268	Alive	One primary only	January	No/Unknown
1841911	1988	Female	65	White	Married (including common law)	Sigmoid Colon	8140/3: Adenocarcinoma, NOS	C18.7-Sigmoid colon	Moderately differentiated; Grade II	20	Blank(s)	Blank(s)	T3	Blank(s)	Blank(s)	N0	Blank(s)	Blank(s)	Blank(s)	Blank(s)	Blank(s)	Blank(s)	Blank(s)	Blank(s)	Blank(s)	Blank(s)	11	0	Blank(s)	No radiation and/or cancer-directed surgery	None	Alive or dead of other cause	Dead (attributable to causes other than this cancer dx)	298	Alzheimers (ICD-9 and 10 only)	One primary only	December	No/Unknown
1841966	1990	Female	65	White	Married (including common law)	Cecum	8140/3: Adenocarcinoma, NOS	C18.0-Cecum	Moderately differentiated; Grade II	30	Blank(s)	Blank(s)	T4	Blank(s)	Blank(s)	N3	Blank(s)	Blank(s)	Blank(s)	Blank(s)	Blank(s)	Blank(s)	Blank(s)	Blank(s)	Blank(s)	Blank(s)	5	3	Blank(s)	No radiation and/or cancer-directed surgery	None	Dead (attributable to this cancer dx)	Alive or dead due to cancer	10	Colon excluding Rectum	One primary only	March	No/Unknown
1842051	1988	Female	75	White	Married (including common law)	Sigmoid Colon	8140/3: Adenocarcinoma, NOS	C18.7-Sigmoid colon	Moderately differentiated; Grade II	20	Blank(s)	Blank(s)	T4	Blank(s)	Blank(s)	N0	Blank(s)	Blank(s)	Blank(s)	Blank(s)	Blank(s)	Blank(s)	Blank(s)	Blank(s)	Blank(s)	Blank(s)	11	0	Blank(s)	Radiation after surgery	Beam radiation	Alive or dead of other cause	Dead (attributable to causes other than this cancer dx)	90	Chronic Obstructive Pulmonary Disease and Allied Cond	One primary only	November	No/Unknown
1842094	1988	Female	68	White	Unknown	Rectum	8140/3: Adenocarcinoma, NOS	C20.9-Rectum, NOS	Moderately differentiated; Grade II	30	Blank(s)	Blank(s)	T3	Blank(s)	Blank(s)	N1	Blank(s)	Blank(s)	Blank(s)	Blank(s)	Blank(s)	Blank(s)	Blank(s)	Blank(s)	Blank(s)	Blank(s)	6	3	Blank(s)	No radiation and/or cancer-directed surgery	None	Alive or dead of other cause	Dead (attributable to causes other than this cancer dx)	250	Other Cause of Death	One primary only	November	No/Unknown
1842126	1990	Male	60	Asian or Pacific Islander	Married (including common law)	Rectosigmoid Junction	8140/3: Adenocarcinoma, NOS	C19.9-Rectosigmoid junction	Poorly differentiated; Grade III	30	Blank(s)	Blank(s)	T3	Blank(s)	Blank(s)	N2	Blank(s)	Blank(s)	Blank(s)	Blank(s)	Blank(s)	Blank(s)	Blank(s)	Blank(s)	Blank(s)	Blank(s)	14	7	Blank(s)	No radiation and/or cancer-directed surgery	None	Alive or dead of other cause	Dead (attributable to causes other than this cancer dx)	165	Diseases of Heart	One primary only	April	Yes
1842136	1990	Female	51	Asian or Pacific Islander	Married (including common law)	Sigmoid Colon	8140/3: Adenocarcinoma, NOS	C18.7-Sigmoid colon	Moderately differentiated; Grade II	20	Blank(s)	Blank(s)	T3	Blank(s)	Blank(s)	N0	Blank(s)	Blank(s)	Blank(s)	Blank(s)	Blank(s)	Blank(s)	Blank(s)	Blank(s)	Blank(s)	Blank(s)	7	0	Blank(s)	No radiation and/or cancer-directed surgery	None	Alive or dead of other cause	Alive or dead due to cancer	230	Alive	One primary only	July	No/Unknown
1842305	1991	Female	72	Asian or Pacific Islander	Married (including common law)	Sigmoid Colon	8481/3: Mucin-producing adenocarcinoma	C18.7-Sigmoid colon	Moderately differentiated; Grade II	30	Blank(s)	Blank(s)	T2	Blank(s)	Blank(s)	N1	Blank(s)	Blank(s)	Blank(s)	Blank(s)	Blank(s)	Blank(s)	Blank(s)	Blank(s)	Blank(s)	Blank(s)	6	3	Blank(s)	No radiation and/or cancer-directed surgery	None	Alive or dead of other cause	Dead (attributable to causes other than this cancer dx)	75	Diabetes Mellitus	One primary only	March	Yes
1842652	1989	Male	38	Black	Married (including common law)	Rectum	8140/3: Adenocarcinoma, NOS	C20.9-Rectum, NOS	Moderately differentiated; Grade II	20	Blank(s)	Blank(s)	T3	Blank(s)	Blank(s)	N0	Blank(s)	Blank(s)	Blank(s)	Blank(s)	Blank(s)	Blank(s)	Blank(s)	Blank(s)	Blank(s)	Blank(s)	12	0	Blank(s)	Radiation after surgery	Beam radiation	Dead (attributable to this cancer dx)	Alive or dead due to cancer	47	Rectum and Rectosigmoid Junction	One primary only	November	Yes
1842741	1988	Female	76	White	Widowed	Descending Colon	8140/3: Adenocarcinoma, NOS	C18.6-Descending colon	Moderately differentiated; Grade II	30	Blank(s)	Blank(s)	T3	Blank(s)	Blank(s)	N1	Blank(s)	Blank(s)	Blank(s)	Blank(s)	Blank(s)	Blank(s)	Blank(s)	Blank(s)	Blank(s)	Blank(s)	12	2	Blank(s)	No radiation and/or cancer-directed surgery	None	Dead (attributable to this cancer dx)	Alive or dead due to cancer	47	Colon excluding Rectum	One primary only	November	No/Unknown
1842837	1990	Male	79	White	Married (including common law)	Sigmoid Colon	8140/3: Adenocarcinoma, NOS	C18.7-Sigmoid colon	Poorly differentiated; Grade III	30	Blank(s)	Blank(s)	T3	Blank(s)	Blank(s)	N2	Blank(s)	Blank(s)	Blank(s)	Blank(s)	Blank(s)	Blank(s)	Blank(s)	Blank(s)	Blank(s)	Blank(s)	10	5	Blank(s)	No radiation and/or cancer-directed surgery	None	Dead (attributable to this cancer dx)	Alive or dead due to cancer	39	Colon excluding Rectum	One primary only	September	No/Unknown
1842938	1988	Male	57	White	Married (including common law)	Descending Colon	8140/3: Adenocarcinoma, NOS	C18.6-Descending colon	Moderately differentiated; Grade II	30	Blank(s)	Blank(s)	T3	Blank(s)	Blank(s)	N1	Blank(s)	Blank(s)	Blank(s)	Blank(s)	Blank(s)	Blank(s)	Blank(s)	Blank(s)	Blank(s)	Blank(s)	5	1	Blank(s)	No radiation and/or cancer-directed surgery	None	Dead (attributable to this cancer dx)	Alive or dead due to cancer	31	Colon excluding Rectum	One primary only	October	No/Unknown
1842954	1989	Female	79	White	Widowed	Rectosigmoid Junction	8140/3: Adenocarcinoma, NOS	C19.9-Rectosigmoid junction	Moderately differentiated; Grade II	10	Blank(s)	Blank(s)	T2	Blank(s)	Blank(s)	N0	Blank(s)	Blank(s)	Blank(s)	Blank(s)	Blank(s)	Blank(s)	Blank(s)	Blank(s)	Blank(s)	Blank(s)	4	0	Blank(s)	No radiation and/or cancer-directed surgery	None	Dead (attributable to this cancer dx)	Alive or dead due to cancer	56	Colon excluding Rectum	One primary only	March	Yes
1843065	1989	Male	67	White	Divorced	Sigmoid Colon	8140/3: Adenocarcinoma, NOS	C18.7-Sigmoid colon	Poorly differentiated; Grade III	20	Blank(s)	Blank(s)	T3	Blank(s)	Blank(s)	N0	Blank(s)	Blank(s)	Blank(s)	Blank(s)	Blank(s)	Blank(s)	Blank(s)	Blank(s)	Blank(s)	Blank(s)	8	0	Blank(s)	No radiation and/or cancer-directed surgery	None	Dead (attributable to this cancer dx)	Alive or dead due to cancer	84	Colon excluding Rectum	One primary only	July	No/Unknown
1843158	1991	Female	70	White	Married (including common law)	Rectum	8140/3: Adenocarcinoma, NOS	C20.9-Rectum, NOS	Moderately differentiated; Grade II	30	Blank(s)	Blank(s)	T3	Blank(s)	Blank(s)	N1	Blank(s)	Blank(s)	Blank(s)	Blank(s)	Blank(s)	Blank(s)	Blank(s)	Blank(s)	Blank(s)	Blank(s)	15	1	Blank(s)	Radiation after surgery	Beam radiation	Dead (attributable to this cancer dx)	Alive or dead due to cancer	31	Rectum and Rectosigmoid Junction	One primary only	March	Yes
1843184	1989	Male	76	White	Married (including common law)	Cecum	8140/3: Adenocarcinoma, NOS	C18.0-Cecum	Moderately differentiated; Grade II	30	Blank(s)	Blank(s)	T3	Blank(s)	Blank(s)	N1	Blank(s)	Blank(s)	Blank(s)	Blank(s)	Blank(s)	Blank(s)	Blank(s)	Blank(s)	Blank(s)	Blank(s)	17	3	Blank(s)	No radiation and/or cancer-directed surgery	None	Dead (attributable to this cancer dx)	Alive or dead due to cancer	46	Colon excluding Rectum	One primary only	May	No/Unknown
1843204	1988	Male	53	Asian or Pacific Islander	Married (including common law)	Rectosigmoid Junction	8140/3: Adenocarcinoma, NOS	C19.9-Rectosigmoid junction	Moderately differentiated; Grade II	20	Blank(s)	Blank(s)	T3	Blank(s)	Blank(s)	N0	Blank(s)	Blank(s)	Blank(s)	Blank(s)	Blank(s)	Blank(s)	Blank(s)	Blank(s)	Blank(s)	Blank(s)	11	0	Blank(s)	No radiation and/or cancer-directed surgery	None	Alive or dead of other cause	Alive or dead due to cancer	309	Alive	One primary only	March	No/Unknown
1843218	1989	Female	74	White	Married (including common law)	Splenic Flexure	8140/3: Adenocarcinoma, NOS	C18.5-Splenic flexure of colon	Moderately differentiated; Grade II	20	Blank(s)	Blank(s)	T4	Blank(s)	Blank(s)	N0	Blank(s)	Blank(s)	Blank(s)	Blank(s)	Blank(s)	Blank(s)	Blank(s)	Blank(s)	Blank(s)	Blank(s)	98	0	Blank(s)	No radiation and/or cancer-directed surgery	None	Dead (attributable to this cancer dx)	Alive or dead due to cancer	13	Colon excluding Rectum	One primary only	July	No/Unknown
1843252	1990	Male	34	White	Married (including common law)	Cecum	8480/3: Mucinous adenocarcinoma	C18.0-Cecum	Moderately differentiated; Grade II	20	Blank(s)	Blank(s)	T4	Blank(s)	Blank(s)	N0	Blank(s)	Blank(s)	Blank(s)	Blank(s)	Blank(s)	Blank(s)	Blank(s)	Blank(s)	Blank(s)	Blank(s)	18	0	Blank(s)	Radiation after surgery	Radiation, NOS method or source not specified	Dead (attributable to this cancer dx)	Alive or dead due to cancer	135	Colon excluding Rectum	One primary only	September	No/Unknown
1843330	1990	Female	72	White	Widowed	Descending Colon	8140/3: Adenocarcinoma, NOS	C18.6-Descending colon	Moderately differentiated; Grade II	10	Blank(s)	Blank(s)	T2	Blank(s)	Blank(s)	N0	Blank(s)	Blank(s)	Blank(s)	Blank(s)	Blank(s)	Blank(s)	Blank(s)	Blank(s)	Blank(s)	Blank(s)	14	0	Blank(s)	No radiation and/or cancer-directed surgery	None	Alive or dead of other cause	Alive or dead due to cancer	278	Alive	One primary only	October	No/Unknown
1843362	1988	Female	70	White	Widowed	Splenic Flexure	8140/3: Adenocarcinoma, NOS	C18.5-Splenic flexure of colon	Moderately differentiated; Grade II	30	Blank(s)	Blank(s)	T3	Blank(s)	Blank(s)	N1	Blank(s)	Blank(s)	Blank(s)	Blank(s)	Blank(s)	Blank(s)	Blank(s)	Blank(s)	Blank(s)	Blank(s)	3	1	Blank(s)	No radiation and/or cancer-directed surgery	None	Alive or dead of other cause	Dead (attributable to causes other than this cancer dx)	28	Diseases of Heart	One primary only	October	No/Unknown
1843370	1991	Male	75	Asian or Pacific Islander	Married (including common law)	Rectum	8140/3: Adenocarcinoma, NOS	C20.9-Rectum, NOS	Moderately differentiated; Grade II	10	Blank(s)	Blank(s)	T2	Blank(s)	Blank(s)	N0	Blank(s)	Blank(s)	Blank(s)	Blank(s)	Blank(s)	Blank(s)	Blank(s)	Blank(s)	Blank(s)	Blank(s)	8	0	Blank(s)	No radiation and/or cancer-directed surgery	None	Alive or dead of other cause	Dead (attributable to causes other than this cancer dx)	104	Diseases of Heart	One primary only	May	No/Unknown
1843421	1989	Male	72	White	Married (including common law)	Sigmoid Colon	8480/3: Mucinous adenocarcinoma	C18.7-Sigmoid colon	Poorly differentiated; Grade III	30	Blank(s)	Blank(s)	T4	Blank(s)	Blank(s)	N2	Blank(s)	Blank(s)	Blank(s)	Blank(s)	Blank(s)	Blank(s)	Blank(s)	Blank(s)	Blank(s)	Blank(s)	19	15	Blank(s)	No radiation and/or cancer-directed surgery	None	Dead (attributable to this cancer dx)	Alive or dead due to cancer	9	Colon excluding Rectum	One primary only	April	No/Unknown
1843745	1989	Male	67	Black	Separated	Sigmoid Colon	8140/3: Adenocarcinoma, NOS	C18.7-Sigmoid colon	Moderately differentiated; Grade II	30	Blank(s)	Blank(s)	T3	Blank(s)	Blank(s)	N2	Blank(s)	Blank(s)	Blank(s)	Blank(s)	Blank(s)	Blank(s)	Blank(s)	Blank(s)	Blank(s)	Blank(s)	98	4	Blank(s)	Radiation after surgery	Beam radiation	Alive or dead of other cause	Dead (attributable to causes other than this cancer dx)	264	Chronic Obstructive Pulmonary Disease and Allied Cond	One primary only	August	No/Unknown
1844031	1989	Female	75	White	Married (including common law)	Rectosigmoid Junction	8140/3: Adenocarcinoma, NOS	C19.9-Rectosigmoid junction	Poorly differentiated; Grade III	30	Blank(s)	Blank(s)	T3	Blank(s)	Blank(s)	N2	Blank(s)	Blank(s)	Blank(s)	Blank(s)	Blank(s)	Blank(s)	Blank(s)	Blank(s)	Blank(s)	Blank(s)	4	4	Blank(s)	No radiation and/or cancer-directed surgery	None	Alive or dead of other cause	Dead (attributable to causes other than this cancer dx)	8	Diabetes Mellitus	One primary only	March	No/Unknown
1844099	1988	Male	61	White	Married (including common law)	Hepatic Flexure	8140/3: Adenocarcinoma, NOS	C18.3-Hepatic flexure of colon	Moderately differentiated; Grade II	20	Blank(s)	Blank(s)	T3	Blank(s)	Blank(s)	N0	Blank(s)	Blank(s)	Blank(s)	Blank(s)	Blank(s)	Blank(s)	Blank(s)	Blank(s)	Blank(s)	Blank(s)	10	0	Blank(s)	No radiation and/or cancer-directed surgery	None	Dead (attributable to this cancer dx)	Alive or dead due to cancer	75	Colon excluding Rectum	One primary only	November	No/Unknown
1844167	1988	Male	75	White	Married (including common law)	Rectum	8140/3: Adenocarcinoma, NOS	C20.9-Rectum, NOS	Poorly differentiated; Grade III	30	Blank(s)	Blank(s)	T2	Blank(s)	Blank(s)	N2	Blank(s)	Blank(s)	Blank(s)	Blank(s)	Blank(s)	Blank(s)	Blank(s)	Blank(s)	Blank(s)	Blank(s)	9	7	Blank(s)	Radiation before and after surgery	Beam radiation	Dead (attributable to this cancer dx)	Alive or dead due to cancer	14	Colon excluding Rectum	One primary only	June	No/Unknown
1844215	1989	Female	77	White	Single (never married)	Cecum	8480/3: Mucinous adenocarcinoma	C18.0-Cecum	Moderately differentiated; Grade II	30	Blank(s)	Blank(s)	T3	Blank(s)	Blank(s)	N1	Blank(s)	Blank(s)	Blank(s)	Blank(s)	Blank(s)	Blank(s)	Blank(s)	Blank(s)	Blank(s)	Blank(s)	12	1	Blank(s)	No radiation and/or cancer-directed surgery	None	Alive or dead of other cause	Dead (attributable to causes other than this cancer dx)	90	Diseases of Heart	One primary only	May	Yes
1844259	1989	Female	74	White	Single (never married)	Sigmoid Colon	8140/3: Adenocarcinoma, NOS	C18.7-Sigmoid colon	Moderately differentiated; Grade II	30	Blank(s)	Blank(s)	T3	Blank(s)	Blank(s)	N1	Blank(s)	Blank(s)	Blank(s)	Blank(s)	Blank(s)	Blank(s)	Blank(s)	Blank(s)	Blank(s)	Blank(s)	11	2	Blank(s)	No radiation and/or cancer-directed surgery	None	Alive or dead of other cause	Dead (attributable to causes other than this cancer dx)	21	Other Cause of Death	One primary only	September	No/Unknown
1844260	1988	Female	76	White	Single (never married)	Transverse Colon	8140/3: Adenocarcinoma, NOS	C18.4-Transverse colon	Moderately differentiated; Grade II	30	Blank(s)	Blank(s)	T3	Blank(s)	Blank(s)	N1	Blank(s)	Blank(s)	Blank(s)	Blank(s)	Blank(s)	Blank(s)	Blank(s)	Blank(s)	Blank(s)	Blank(s)	38	3	Blank(s)	No radiation and/or cancer-directed surgery	None	Alive or dead of other cause	Dead (attributable to causes other than this cancer dx)	28	Chronic Obstructive Pulmonary Disease and Allied Cond	One primary only	September	No/Unknown
1844272	1991	Male	56	Asian or Pacific Islander	Married (including common law)	Rectosigmoid Junction	8140/3: Adenocarcinoma, NOS	C19.9-Rectosigmoid junction	Poorly differentiated; Grade III	30	Blank(s)	Blank(s)	T4	Blank(s)	Blank(s)	N2	Blank(s)	Blank(s)	Blank(s)	Blank(s)	Blank(s)	Blank(s)	Blank(s)	Blank(s)	Blank(s)	Blank(s)	40	17	Blank(s)	No radiation and/or cancer-directed surgery	None	Dead (attributable to this cancer dx)	Alive or dead due to cancer	34	Rectum and Rectosigmoid Junction	One primary only	July	Yes
1844274	1988	Female	54	White	Married (including common law)	Cecum	8480/3: Mucinous adenocarcinoma	C18.0-Cecum	Poorly differentiated; Grade III	30	Blank(s)	Blank(s)	T3	Blank(s)	Blank(s)	N3	Blank(s)	Blank(s)	Blank(s)	Blank(s)	Blank(s)	Blank(s)	Blank(s)	Blank(s)	Blank(s)	Blank(s)	8	4	Blank(s)	Radiation after surgery	Beam radiation	Dead (attributable to this cancer dx)	Alive or dead due to cancer	92	Lung and Bronchus	One primary only	May	No/Unknown
1844329	1991	Male	61	White	Married (including common law)	Descending Colon	8480/3: Mucinous adenocarcinoma	C18.6-Descending colon	Moderately differentiated; Grade II	20	Blank(s)	Blank(s)	T3	Blank(s)	Blank(s)	N0	Blank(s)	Blank(s)	Blank(s)	Blank(s)	Blank(s)	Blank(s)	Blank(s)	Blank(s)	Blank(s)	Blank(s)	22	0	Blank(s)	No radiation and/or cancer-directed surgery	None	Alive or dead of other cause	Alive or dead due to cancer	270	Alive	One primary only	June	No/Unknown
1844444	1990	Female	76	White	Married (including common law)	Rectum	8140/3: Adenocarcinoma, NOS	C20.9-Rectum, NOS	Moderately differentiated; Grade II	30	Blank(s)	Blank(s)	T3	Blank(s)	Blank(s)	N1	Blank(s)	Blank(s)	Blank(s)	Blank(s)	Blank(s)	Blank(s)	Blank(s)	Blank(s)	Blank(s)	Blank(s)	4	1	Blank(s)	No radiation and/or cancer-directed surgery	None	Alive or dead of other cause	Dead (attributable to causes other than this cancer dx)	36	Diseases of Heart	One primary only	September	No/Unknown
1844464	1989	Male	65	White	Widowed	Transverse Colon	8140/3: Adenocarcinoma, NOS	C18.4-Transverse colon	Poorly differentiated; Grade III	20	Blank(s)	Blank(s)	T3	Blank(s)	Blank(s)	N0	Blank(s)	Blank(s)	Blank(s)	Blank(s)	Blank(s)	Blank(s)	Blank(s)	Blank(s)	Blank(s)	Blank(s)	10	0	Blank(s)	No radiation and/or cancer-directed surgery	None	Alive or dead of other cause	Dead (attributable to causes other than this cancer dx)	17	Pneumonia and Influenza	One primary only	April	No/Unknown
1844582	1988	Male	72	Black	Married (including common law)	Rectum	8140/3: Adenocarcinoma, NOS	C20.9-Rectum, NOS	Moderately differentiated; Grade II	20	Blank(s)	Blank(s)	T3	Blank(s)	Blank(s)	N0	Blank(s)	Blank(s)	Blank(s)	Blank(s)	Blank(s)	Blank(s)	Blank(s)	Blank(s)	Blank(s)	Blank(s)	25	0	Blank(s)	Radiation after surgery	Beam radiation	Alive or dead of other cause	Dead (attributable to causes other than this cancer dx)	7	Pneumonia and Influenza	One primary only	July	No/Unknown
1844590	1990	Female	70	Asian or Pacific Islander	Widowed	Sigmoid Colon	8140/3: Adenocarcinoma, NOS	C18.7-Sigmoid colon	Moderately differentiated; Grade II	10	Blank(s)	Blank(s)	T2	Blank(s)	Blank(s)	N0	Blank(s)	Blank(s)	Blank(s)	Blank(s)	Blank(s)	Blank(s)	Blank(s)	Blank(s)	Blank(s)	Blank(s)	5	0	Blank(s)	No radiation and/or cancer-directed surgery	None	Dead (attributable to this cancer dx)	Alive or dead due to cancer	75	Colon excluding Rectum	One primary only	July	No/Unknown
1844629	1989	Female	71	White	Married (including common law)	Cecum	8480/3: Mucinous adenocarcinoma	C18.0-Cecum	Poorly differentiated; Grade III	20	Blank(s)	Blank(s)	T4	Blank(s)	Blank(s)	N0	Blank(s)	Blank(s)	Blank(s)	Blank(s)	Blank(s)	Blank(s)	Blank(s)	Blank(s)	Blank(s)	Blank(s)	13	0	Blank(s)	Radiation after surgery	Radiation, NOS method or source not specified	Alive or dead of other cause	Dead (attributable to causes other than this cancer dx)	290	Diseases of Heart	One primary only	June	No/Unknown
1844640	1991	Male	70	White	Married (including common law)	Rectosigmoid Junction	8490/3: Signet ring cell carcinoma	C19.9-Rectosigmoid junction	Poorly differentiated; Grade III	30	Blank(s)	Blank(s)	T3	Blank(s)	Blank(s)	N2	Blank(s)	Blank(s)	Blank(s)	Blank(s)	Blank(s)	Blank(s)	Blank(s)	Blank(s)	Blank(s)	Blank(s)	15	5	Blank(s)	Radiation after surgery	Beam radiation	Dead (attributable to this cancer dx)	Alive or dead due to cancer	11	Rectum and Rectosigmoid Junction	One primary only	February	No/Unknown
1844760	1990	Male	77	White	Married (including common law)	Cecum	8140/3: Adenocarcinoma, NOS	C18.0-Cecum	Moderately differentiated; Grade II	20	Blank(s)	Blank(s)	T3	Blank(s)	Blank(s)	N0	Blank(s)	Blank(s)	Blank(s)	Blank(s)	Blank(s)	Blank(s)	Blank(s)	Blank(s)	Blank(s)	Blank(s)	9	0	Blank(s)	No radiation and/or cancer-directed surgery	None	Dead (attributable to this cancer dx)	Alive or dead due to cancer	37	Colon excluding Rectum	One primary only	February	No/Unknown
1844781	1990	Male	73	White	Widowed	Hepatic Flexure	8140/3: Adenocarcinoma, NOS	C18.3-Hepatic flexure of colon	Moderately differentiated; Grade II	30	Blank(s)	Blank(s)	T3	Blank(s)	Blank(s)	N1	Blank(s)	Blank(s)	Blank(s)	Blank(s)	Blank(s)	Blank(s)	Blank(s)	Blank(s)	Blank(s)	Blank(s)	16	1	Blank(s)	No radiation and/or cancer-directed surgery	None	Alive or dead of other cause	Dead (attributable to causes other than this cancer dx)	89	Cerebrovascular Diseases	One primary only	September	No/Unknown
1844793	1988	Male	61	Asian or Pacific Islander	Married (including common law)	Transverse Colon	8140/3: Adenocarcinoma, NOS	C18.4-Transverse colon	Poorly differentiated; Grade III	20	Blank(s)	Blank(s)	T4	Blank(s)	Blank(s)	N0	Blank(s)	Blank(s)	Blank(s)	Blank(s)	Blank(s)	Blank(s)	Blank(s)	Blank(s)	Blank(s)	Blank(s)	48	0	Blank(s)	Radiation after surgery	Beam radiation	Alive or dead of other cause	Alive or dead due to cancer	308	Alive	One primary only	April	No/Unknown
1844844	1988	Female	62	White	Single (never married)	Transverse Colon	8140/3: Adenocarcinoma, NOS	C18.4-Transverse colon	Poorly differentiated; Grade III	20	Blank(s)	Blank(s)	T3	Blank(s)	Blank(s)	N0	Blank(s)	Blank(s)	Blank(s)	Blank(s)	Blank(s)	Blank(s)	Blank(s)	Blank(s)	Blank(s)	Blank(s)	24	0	Blank(s)	No radiation and/or cancer-directed surgery	None	Dead (attributable to this cancer dx)	Alive or dead due to cancer	9	Colon excluding Rectum	One primary only	January	No/Unknown
1844887	1989	Male	67	White	Married (including common law)	Rectosigmoid Junction	8140/3: Adenocarcinoma, NOS	C19.9-Rectosigmoid junction	Moderately differentiated; Grade II	10	Blank(s)	Blank(s)	T2	Blank(s)	Blank(s)	N0	Blank(s)	Blank(s)	Blank(s)	Blank(s)	Blank(s)	Blank(s)	Blank(s)	Blank(s)	Blank(s)	Blank(s)	3	0	Blank(s)	No radiation and/or cancer-directed surgery	None	Alive or dead of other cause	Dead (attributable to causes other than this cancer dx)	232	Diseases of Heart	One primary only	February	No/Unknown
1845037	1988	Male	73	White	Married (including common law)	Sigmoid Colon	8481/3: Mucin-producing adenocarcinoma	C18.7-Sigmoid colon	Poorly differentiated; Grade III	30	Blank(s)	Blank(s)	T3	Blank(s)	Blank(s)	N1	Blank(s)	Blank(s)	Blank(s)	Blank(s)	Blank(s)	Blank(s)	Blank(s)	Blank(s)	Blank(s)	Blank(s)	3	3	Blank(s)	No radiation and/or cancer-directed surgery	None	Alive or dead of other cause	Dead (attributable to causes other than this cancer dx)	11	Diseases of Heart	One primary only	November	No/Unknown
1845239	1989	Female	40	White	Married (including common law)	Ascending Colon	8140/3: Adenocarcinoma, NOS	C18.2-Ascending colon	Moderately differentiated; Grade II	20	Blank(s)	Blank(s)	T3	Blank(s)	Blank(s)	N0	Blank(s)	Blank(s)	Blank(s)	Blank(s)	Blank(s)	Blank(s)	Blank(s)	Blank(s)	Blank(s)	Blank(s)	5	0	Blank(s)	No radiation and/or cancer-directed surgery	None	Dead (attributable to this cancer dx)	Alive or dead due to cancer	47	Colon excluding Rectum	One primary only	December	Yes
1845356	1989	Male	64	White	Married (including common law)	Rectosigmoid Junction	8140/3: Adenocarcinoma, NOS	C19.9-Rectosigmoid junction	Moderately differentiated; Grade II	10	Blank(s)	Blank(s)	T2	Blank(s)	Blank(s)	N0	Blank(s)	Blank(s)	Blank(s)	Blank(s)	Blank(s)	Blank(s)	Blank(s)	Blank(s)	Blank(s)	Blank(s)	5	0	Blank(s)	No radiation and/or cancer-directed surgery	None	Dead (attributable to this cancer dx)	Alive or dead due to cancer	20	Lung and Bronchus	One primary only	November	No/Unknown
1845404	1991	Female	52	White	Married (including common law)	Ascending Colon	8480/3: Mucinous adenocarcinoma	C18.2-Ascending colon	Moderately differentiated; Grade II	20	Blank(s)	Blank(s)	T4	Blank(s)	Blank(s)	N0	Blank(s)	Blank(s)	Blank(s)	Blank(s)	Blank(s)	Blank(s)	Blank(s)	Blank(s)	Blank(s)	Blank(s)	8	0	Blank(s)	No radiation and/or cancer-directed surgery	None	Alive or dead of other cause	Alive or dead due to cancer	271	Alive	One primary only	May	Yes
1845640	1991	Male	73	Asian or Pacific Islander	Married (including common law)	Sigmoid Colon	8481/3: Mucin-producing adenocarcinoma	C18.7-Sigmoid colon	Moderately differentiated; Grade II	20	Blank(s)	Blank(s)	T3	Blank(s)	Blank(s)	N0	Blank(s)	Blank(s)	Blank(s)	Blank(s)	Blank(s)	Blank(s)	Blank(s)	Blank(s)	Blank(s)	Blank(s)	7	0	Blank(s)	No radiation and/or cancer-directed surgery	None	Dead (attributable to this cancer dx)	Alive or dead due to cancer	13	Colon excluding Rectum	One primary only	October	No/Unknown
1845709	1991	Female	46	Asian or Pacific Islander	Married (including common law)	Sigmoid Colon	8140/3: Adenocarcinoma, NOS	C18.7-Sigmoid colon	Moderately differentiated; Grade II	10	Blank(s)	Blank(s)	T1	Blank(s)	Blank(s)	N0	Blank(s)	Blank(s)	Blank(s)	Blank(s)	Blank(s)	Blank(s)	Blank(s)	Blank(s)	Blank(s)	Blank(s)	7	0	Blank(s)	No radiation and/or cancer-directed surgery	None	Alive or dead of other cause	Alive or dead due to cancer	269	Alive	One primary only	July	No/Unknown
1845842	1991	Female	67	White	Married (including common law)	Cecum	8480/3: Mucinous adenocarcinoma	C18.0-Cecum	Moderately differentiated; Grade II	30	Blank(s)	Blank(s)	T3	Blank(s)	Blank(s)	N1	Blank(s)	Blank(s)	Blank(s)	Blank(s)	Blank(s)	Blank(s)	Blank(s)	Blank(s)	Blank(s)	Blank(s)	8	1	Blank(s)	No radiation and/or cancer-directed surgery	None	Alive or dead of other cause	Dead (attributable to causes other than this cancer dx)	186	Nephritis, Nephrotic Syndrome and Nephrosis	One primary only	October	Yes
1846047	1991	Male	58	White	Single (never married)	Rectum	8140/3: Adenocarcinoma, NOS	C20.9-Rectum, NOS	Moderately differentiated; Grade II	20	Blank(s)	Blank(s)	T3	Blank(s)	Blank(s)	N0	Blank(s)	Blank(s)	Blank(s)	Blank(s)	Blank(s)	Blank(s)	Blank(s)	Blank(s)	Blank(s)	Blank(s)	16	0	Blank(s)	No radiation and/or cancer-directed surgery	None	Dead (attributable to this cancer dx)	Alive or dead due to cancer	19	Other Cause of Death	One primary only	February	No/Unknown
1846172	1991	Male	71	White	Married (including common law)	Sigmoid Colon	8140/3: Adenocarcinoma, NOS	C18.7-Sigmoid colon	Moderately differentiated; Grade II	20	Blank(s)	Blank(s)	T3	Blank(s)	Blank(s)	N0	Blank(s)	Blank(s)	Blank(s)	Blank(s)	Blank(s)	Blank(s)	Blank(s)	Blank(s)	Blank(s)	Blank(s)	7	0	Blank(s)	No radiation and/or cancer-directed surgery	None	Alive or dead of other cause	Dead (attributable to causes other than this cancer dx)	56	Cerebrovascular Diseases	One primary only	March	No/Unknown
1846261	1988	Male	77	Asian or Pacific Islander	Married (including common law)	Rectum	8140/3: Adenocarcinoma, NOS	C20.9-Rectum, NOS	Moderately differentiated; Grade II	10	Blank(s)	Blank(s)	T1	Blank(s)	Blank(s)	N0	Blank(s)	Blank(s)	Blank(s)	Blank(s)	Blank(s)	Blank(s)	Blank(s)	Blank(s)	Blank(s)	Blank(s)	16	0	Blank(s)	No radiation and/or cancer-directed surgery	None	Alive or dead of other cause	Dead (attributable to causes other than this cancer dx)	13	Diseases of Heart	One primary only	June	No/Unknown
1846411	1989	Male	75	White	Married (including common law)	Rectosigmoid Junction	8140/3: Adenocarcinoma, NOS	C19.9-Rectosigmoid junction	Moderately differentiated; Grade II	10	Blank(s)	Blank(s)	T2	Blank(s)	Blank(s)	N0	Blank(s)	Blank(s)	Blank(s)	Blank(s)	Blank(s)	Blank(s)	Blank(s)	Blank(s)	Blank(s)	Blank(s)	9	0	Blank(s)	No radiation and/or cancer-directed surgery	None	Alive or dead of other cause	Dead (attributable to causes other than this cancer dx)	66	Other Cause of Death	One primary only	November	No/Unknown
1846565	1989	Male	35	Black	Married (including common law)	Transverse Colon	8140/3: Adenocarcinoma, NOS	C18.4-Transverse colon	Moderately differentiated; Grade II	20	Blank(s)	Blank(s)	T4	Blank(s)	Blank(s)	N0	Blank(s)	Blank(s)	Blank(s)	Blank(s)	Blank(s)	Blank(s)	Blank(s)	Blank(s)	Blank(s)	Blank(s)	25	0	Blank(s)	No radiation and/or cancer-directed surgery	None	Alive or dead of other cause	Alive or dead due to cancer	293	Alive	One primary only	July	No/Unknown
1846572	1991	Male	58	White	Single (never married)	Splenic Flexure	8140/3: Adenocarcinoma, NOS	C18.5-Splenic flexure of colon	Well differentiated; Grade I	20	Blank(s)	Blank(s)	T3	Blank(s)	Blank(s)	N0	Blank(s)	Blank(s)	Blank(s)	Blank(s)	Blank(s)	Blank(s)	Blank(s)	Blank(s)	Blank(s)	Blank(s)	15	0	Blank(s)	No radiation and/or cancer-directed surgery	None	Alive or dead of other cause	Dead (attributable to causes other than this cancer dx)	23	Other Cause of Death	One primary only	April	No/Unknown
1846769	1990	Male	61	White	Married (including common law)	Rectosigmoid Junction	8140/3: Adenocarcinoma, NOS	C19.9-Rectosigmoid junction	Moderately differentiated; Grade II	20	Blank(s)	Blank(s)	T3	Blank(s)	Blank(s)	N0	Blank(s)	Blank(s)	Blank(s)	Blank(s)	Blank(s)	Blank(s)	Blank(s)	Blank(s)	Blank(s)	Blank(s)	14	0	Blank(s)	Radiation after surgery	Beam radiation	Alive or dead of other cause	Dead (attributable to causes other than this cancer dx)	249	Other Cause of Death	One primary only	January	Yes
1846900	1988	Female	59	White	Married (including common law)	Ascending Colon	8140/3: Adenocarcinoma, NOS	C18.2-Ascending colon	Well differentiated; Grade I	10	Blank(s)	Blank(s)	T1	Blank(s)	Blank(s)	N0	Blank(s)	Blank(s)	Blank(s)	Blank(s)	Blank(s)	Blank(s)	Blank(s)	Blank(s)	Blank(s)	Blank(s)	1	0	Blank(s)	No radiation and/or cancer-directed surgery	None	Alive or dead of other cause	Dead (attributable to causes other than this cancer dx)	226	Chronic Obstructive Pulmonary Disease and Allied Cond	One primary only	June	No/Unknown
1846949	1990	Female	80	White	Widowed	Transverse Colon	8480/3: Mucinous adenocarcinoma	C18.4-Transverse colon	Moderately differentiated; Grade II	20	Blank(s)	Blank(s)	T3	Blank(s)	Blank(s)	N0	Blank(s)	Blank(s)	Blank(s)	Blank(s)	Blank(s)	Blank(s)	Blank(s)	Blank(s)	Blank(s)	Blank(s)	16	0	Blank(s)	No radiation and/or cancer-directed surgery	None	Alive or dead of other cause	Dead (attributable to causes other than this cancer dx)	93	Other Cause of Death	One primary only	June	No/Unknown
1847045	1991	Female	64	White	Single (never married)	Cecum	8480/3: Mucinous adenocarcinoma	C18.0-Cecum	Moderately differentiated; Grade II	20	Blank(s)	Blank(s)	T4	Blank(s)	Blank(s)	N0	Blank(s)	Blank(s)	Blank(s)	Blank(s)	Blank(s)	Blank(s)	Blank(s)	Blank(s)	Blank(s)	Blank(s)	44	0	Blank(s)	No radiation and/or cancer-directed surgery	None	Dead (attributable to this cancer dx)	Alive or dead due to cancer	52	Colon excluding Rectum	One primary only	June	Yes
1847111	1990	Male	52	White	Married (including common law)	Splenic Flexure	8140/3: Adenocarcinoma, NOS	C18.5-Splenic flexure of colon	Poorly differentiated; Grade III	30	Blank(s)	Blank(s)	T4	Blank(s)	Blank(s)	N1	Blank(s)	Blank(s)	Blank(s)	Blank(s)	Blank(s)	Blank(s)	Blank(s)	Blank(s)	Blank(s)	Blank(s)	9	3	Blank(s)	No radiation and/or cancer-directed surgery	None	Dead (attributable to this cancer dx)	Alive or dead due to cancer	8	Colon excluding Rectum	One primary only	January	Yes
1847157	1991	Female	62	White	Married (including common law)	Rectosigmoid Junction	8140/3: Adenocarcinoma, NOS	C19.9-Rectosigmoid junction	Moderately differentiated; Grade II	20	Blank(s)	Blank(s)	T4	Blank(s)	Blank(s)	N0	Blank(s)	Blank(s)	Blank(s)	Blank(s)	Blank(s)	Blank(s)	Blank(s)	Blank(s)	Blank(s)	Blank(s)	98	0	Blank(s)	No radiation and/or cancer-directed surgery	None	Alive or dead of other cause	Dead (attributable to causes other than this cancer dx)	15	Cerebrovascular Diseases	One primary only	May	No/Unknown
1847306	1991	Female	78	White	Single (never married)	Rectum	8140/3: Adenocarcinoma, NOS	C20.9-Rectum, NOS	Moderately differentiated; Grade II	10	Blank(s)	Blank(s)	T1	Blank(s)	Blank(s)	N0	Blank(s)	Blank(s)	Blank(s)	Blank(s)	Blank(s)	Blank(s)	Blank(s)	Blank(s)	Blank(s)	Blank(s)	7	0	Blank(s)	No radiation and/or cancer-directed surgery	None	Alive or dead of other cause	Dead (attributable to causes other than this cancer dx)	206	Alzheimers (ICD-9 and 10 only)	One primary only	May	No/Unknown
1847376	1990	Female	79	White	Widowed	Splenic Flexure	8140/3: Adenocarcinoma, NOS	C18.5-Splenic flexure of colon	Moderately differentiated; Grade II	20	Blank(s)	Blank(s)	T4	Blank(s)	Blank(s)	N0	Blank(s)	Blank(s)	Blank(s)	Blank(s)	Blank(s)	Blank(s)	Blank(s)	Blank(s)	Blank(s)	Blank(s)	7	0	Blank(s)	No radiation and/or cancer-directed surgery	None	Alive or dead of other cause	Dead (attributable to causes other than this cancer dx)	94	Chronic Liver Disease and Cirrhosis	One primary only	September	No/Unknown
1847584	1990	Male	57	White	Married (including common law)	Rectosigmoid Junction	8140/3: Adenocarcinoma, NOS	C19.9-Rectosigmoid junction	Moderately differentiated; Grade II	20	Blank(s)	Blank(s)	T3	Blank(s)	Blank(s)	N0	Blank(s)	Blank(s)	Blank(s)	Blank(s)	Blank(s)	Blank(s)	Blank(s)	Blank(s)	Blank(s)	Blank(s)	6	0	Blank(s)	Radiation after surgery	Beam radiation	Alive or dead of other cause	Alive or dead due to cancer	287	Alive	One primary only	January	Yes
1847641	1991	Male	74	Black	Married (including common law)	Cecum	8140/3: Adenocarcinoma, NOS	C18.0-Cecum	Moderately differentiated; Grade II	20	Blank(s)	Blank(s)	T3	Blank(s)	Blank(s)	N0	Blank(s)	Blank(s)	Blank(s)	Blank(s)	Blank(s)	Blank(s)	Blank(s)	Blank(s)	Blank(s)	Blank(s)	19	0	Blank(s)	No radiation and/or cancer-directed surgery	None	Alive or dead of other cause	Dead (attributable to causes other than this cancer dx)	50	Other Cause of Death	One primary only	September	No/Unknown
1847714	1989	Male	65	White	Divorced	Sigmoid Colon	8140/3: Adenocarcinoma, NOS	C18.7-Sigmoid colon	Poorly differentiated; Grade III	30	Blank(s)	Blank(s)	T4	Blank(s)	Blank(s)	N2	Blank(s)	Blank(s)	Blank(s)	Blank(s)	Blank(s)	Blank(s)	Blank(s)	Blank(s)	Blank(s)	Blank(s)	9	8	Blank(s)	No radiation and/or cancer-directed surgery	None	Dead (attributable to this cancer dx)	Alive or dead due to cancer	7	Rectum and Rectosigmoid Junction	One primary only	May	Yes
1847777	1988	Male	70	White	Married (including common law)	Sigmoid Colon	8481/3: Mucin-producing adenocarcinoma	C18.7-Sigmoid colon	Moderately differentiated; Grade II	20	Blank(s)	Blank(s)	T3	Blank(s)	Blank(s)	N0	Blank(s)	Blank(s)	Blank(s)	Blank(s)	Blank(s)	Blank(s)	Blank(s)	Blank(s)	Blank(s)	Blank(s)	12	0	Blank(s)	No radiation and/or cancer-directed surgery	None	Dead (attributable to this cancer dx)	Alive or dead due to cancer	20	Lung and Bronchus	One primary only	May	No/Unknown
1847800	1989	Male	72	White	Married (including common law)	Cecum	8140/3: Adenocarcinoma, NOS	C18.0-Cecum	Moderately differentiated; Grade II	10	Blank(s)	Blank(s)	T2	Blank(s)	Blank(s)	N0	Blank(s)	Blank(s)	Blank(s)	Blank(s)	Blank(s)	Blank(s)	Blank(s)	Blank(s)	Blank(s)	Blank(s)	9	0	Blank(s)	No radiation and/or cancer-directed surgery	None	Alive or dead of other cause	Dead (attributable to causes other than this cancer dx)	16	Diseases of Heart	One primary only	March	No/Unknown
1847842	1991	Male	68	White	Married (including common law)	Cecum	8140/3: Adenocarcinoma, NOS	C18.0-Cecum	Well differentiated; Grade I	20	Blank(s)	Blank(s)	T3	Blank(s)	Blank(s)	N0	Blank(s)	Blank(s)	Blank(s)	Blank(s)	Blank(s)	Blank(s)	Blank(s)	Blank(s)	Blank(s)	Blank(s)	8	0	Blank(s)	No radiation and/or cancer-directed surgery	None	Alive or dead of other cause	Dead (attributable to causes other than this cancer dx)	145	Diseases of Heart	One primary only	September	No/Unknown
1848289	1990	Male	64	White	Single (never married)	Cecum	8140/3: Adenocarcinoma, NOS	C18.0-Cecum	Poorly differentiated; Grade III	20	Blank(s)	Blank(s)	T4	Blank(s)	Blank(s)	N0	Blank(s)	Blank(s)	Blank(s)	Blank(s)	Blank(s)	Blank(s)	Blank(s)	Blank(s)	Blank(s)	Blank(s)	19	0	Blank(s)	No radiation and/or cancer-directed surgery	None	Dead (attributable to this cancer dx)	Alive or dead due to cancer	105	Colon excluding Rectum	One primary only	March	No/Unknown
1848328	1991	Male	78	White	Single (never married)	Cecum	8140/3: Adenocarcinoma, NOS	C18.0-Cecum	Moderately differentiated; Grade II	20	Blank(s)	Blank(s)	T4	Blank(s)	Blank(s)	N0	Blank(s)	Blank(s)	Blank(s)	Blank(s)	Blank(s)	Blank(s)	Blank(s)	Blank(s)	Blank(s)	Blank(s)	6	0	Blank(s)	No radiation and/or cancer-directed surgery	None	Alive or dead of other cause	Dead (attributable to causes other than this cancer dx)	10	Diseases of Heart	One primary only	June	No/Unknown
1848455	1990	Female	69	White	Married (including common law)	Cecum	8140/3: Adenocarcinoma, NOS	C18.0-Cecum	Poorly differentiated; Grade III	30	Blank(s)	Blank(s)	T3	Blank(s)	Blank(s)	N2	Blank(s)	Blank(s)	Blank(s)	Blank(s)	Blank(s)	Blank(s)	Blank(s)	Blank(s)	Blank(s)	Blank(s)	16	4	Blank(s)	No radiation and/or cancer-directed surgery	None	Dead (attributable to this cancer dx)	Alive or dead due to cancer	21	Colon excluding Rectum	One primary only	March	No/Unknown
1848458	1989	Female	69	White	Divorced	Rectum	8140/3: Adenocarcinoma, NOS	C20.9-Rectum, NOS	Poorly differentiated; Grade III	10	Blank(s)	Blank(s)	T2	Blank(s)	Blank(s)	N0	Blank(s)	Blank(s)	Blank(s)	Blank(s)	Blank(s)	Blank(s)	Blank(s)	Blank(s)	Blank(s)	Blank(s)	12	0	Blank(s)	No radiation and/or cancer-directed surgery	None	Alive or dead of other cause	Dead (attributable to causes other than this cancer dx)	151	Diseases of Heart	One primary only	June	No/Unknown
1848487	1991	Male	65	White	Married (including common law)	Hepatic Flexure	8140/3: Adenocarcinoma, NOS	C18.3-Hepatic flexure of colon	Moderately differentiated; Grade II	20	Blank(s)	Blank(s)	T3	Blank(s)	Blank(s)	N0	Blank(s)	Blank(s)	Blank(s)	Blank(s)	Blank(s)	Blank(s)	Blank(s)	Blank(s)	Blank(s)	Blank(s)	9	0	Blank(s)	No radiation and/or cancer-directed surgery	None	Dead (attributable to this cancer dx)	Alive or dead due to cancer	37	Colon excluding Rectum	One primary only	March	Yes
1848603	1989	Female	77	White	Widowed	Rectosigmoid Junction	8140/3: Adenocarcinoma, NOS	C19.9-Rectosigmoid junction	Moderately differentiated; Grade II	30	Blank(s)	Blank(s)	T3	Blank(s)	Blank(s)	N1	Blank(s)	Blank(s)	Blank(s)	Blank(s)	Blank(s)	Blank(s)	Blank(s)	Blank(s)	Blank(s)	Blank(s)	7	2	Blank(s)	No radiation and/or cancer-directed surgery	None	Dead (attributable to this cancer dx)	Alive or dead due to cancer	37	Rectum and Rectosigmoid Junction	One primary only	June	Yes
1848654	1991	Female	63	White	Divorced	Sigmoid Colon	8140/3: Adenocarcinoma, NOS	C18.7-Sigmoid colon	Moderately differentiated; Grade II	20	Blank(s)	Blank(s)	T3	Blank(s)	Blank(s)	N0	Blank(s)	Blank(s)	Blank(s)	Blank(s)	Blank(s)	Blank(s)	Blank(s)	Blank(s)	Blank(s)	Blank(s)	13	0	Blank(s)	No radiation and/or cancer-directed surgery	None	Alive or dead of other cause	Alive or dead due to cancer	272	Alive	One primary only	April	Yes
1848703	1989	Male	69	White	Married (including common law)	Sigmoid Colon	8140/3: Adenocarcinoma, NOS	C18.7-Sigmoid colon	Moderately differentiated; Grade II	10	Blank(s)	Blank(s)	T2	Blank(s)	Blank(s)	N0	Blank(s)	Blank(s)	Blank(s)	Blank(s)	Blank(s)	Blank(s)	Blank(s)	Blank(s)	Blank(s)	Blank(s)	15	0	Blank(s)	Radiation prior to surgery	Beam radiation	Alive or dead of other cause	Dead (attributable to causes other than this cancer dx)	185	Diseases of Heart	One primary only	August	No/Unknown
1848706	1991	Female	61	Asian or Pacific Islander	Married (including common law)	Rectum	8140/3: Adenocarcinoma, NOS	C20.9-Rectum, NOS	Poorly differentiated; Grade III	10	Blank(s)	Blank(s)	T2	Blank(s)	Blank(s)	N0	Blank(s)	Blank(s)	Blank(s)	Blank(s)	Blank(s)	Blank(s)	Blank(s)	Blank(s)	Blank(s)	Blank(s)	0	98	Blank(s)	Radiation after surgery	Beam radiation	Alive or dead of other cause	Alive or dead due to cancer	258	Alive	One primary only	April	No/Unknown
1848964	1988	Male	71	White	Married (including common law)	Cecum	8140/3: Adenocarcinoma, NOS	C18.0-Cecum	Moderately differentiated; Grade II	20	Blank(s)	Blank(s)	T4	Blank(s)	Blank(s)	N0	Blank(s)	Blank(s)	Blank(s)	Blank(s)	Blank(s)	Blank(s)	Blank(s)	Blank(s)	Blank(s)	Blank(s)	14	0	Blank(s)	No radiation and/or cancer-directed surgery	None	Alive or dead of other cause	Dead (attributable to causes other than this cancer dx)	258	Chronic Obstructive Pulmonary Disease and Allied Cond	One primary only	October	No/Unknown
1849012	1989	Female	79	White	Widowed	Ascending Colon	8140/3: Adenocarcinoma, NOS	C18.2-Ascending colon	Poorly differentiated; Grade III	20	Blank(s)	Blank(s)	T3	Blank(s)	Blank(s)	N0	Blank(s)	Blank(s)	Blank(s)	Blank(s)	Blank(s)	Blank(s)	Blank(s)	Blank(s)	Blank(s)	Blank(s)	11	0	Blank(s)	No radiation and/or cancer-directed surgery	None	Dead (attributable to this cancer dx)	Alive or dead due to cancer	221	Colon excluding Rectum	One primary only	March	Yes
1849154	1990	Male	64	White	Married (including common law)	Splenic Flexure	8140/3: Adenocarcinoma, NOS	C18.5-Splenic flexure of colon	Moderately differentiated; Grade II	20	Blank(s)	Blank(s)	T3	Blank(s)	Blank(s)	N0	Blank(s)	Blank(s)	Blank(s)	Blank(s)	Blank(s)	Blank(s)	Blank(s)	Blank(s)	Blank(s)	Blank(s)	3	0	Blank(s)	No radiation and/or cancer-directed surgery	None	Alive or dead of other cause	Dead (attributable to causes other than this cancer dx)	20	Diseases of Heart	One primary only	April	No/Unknown
1849178	1989	Female	57	White	Widowed	Sigmoid Colon	8481/3: Mucin-producing adenocarcinoma	C18.7-Sigmoid colon	Well differentiated; Grade I	20	Blank(s)	Blank(s)	T3	Blank(s)	Blank(s)	N0	Blank(s)	Blank(s)	Blank(s)	Blank(s)	Blank(s)	Blank(s)	Blank(s)	Blank(s)	Blank(s)	Blank(s)	4	0	Blank(s)	No radiation and/or cancer-directed surgery	None	Alive or dead of other cause	Dead (attributable to causes other than this cancer dx)	263	Aortic Aneurysm and Dissection	One primary only	February	No/Unknown
1849189	1988	Male	80	White	Widowed	Ascending Colon	8140/3: Adenocarcinoma, NOS	C18.2-Ascending colon	Poorly differentiated; Grade III	20	Blank(s)	Blank(s)	T3	Blank(s)	Blank(s)	N0	Blank(s)	Blank(s)	Blank(s)	Blank(s)	Blank(s)	Blank(s)	Blank(s)	Blank(s)	Blank(s)	Blank(s)	16	0	Blank(s)	No radiation and/or cancer-directed surgery	None	Alive or dead of other cause	Dead (attributable to causes other than this cancer dx)	2	Diseases of Heart	One primary only	May	No/Unknown
1849212	1990	Female	69	White	Single (never married)	Rectum	8480/3: Mucinous adenocarcinoma	C20.9-Rectum, NOS	Moderately differentiated; Grade II	30	Blank(s)	Blank(s)	T3	Blank(s)	Blank(s)	N1	Blank(s)	Blank(s)	Blank(s)	Blank(s)	Blank(s)	Blank(s)	Blank(s)	Blank(s)	Blank(s)	Blank(s)	10	2	Blank(s)	Radiation after surgery	Beam radiation	Alive or dead of other cause	Dead (attributable to causes other than this cancer dx)	197	Other Cause of Death	One primary only	February	Yes
1849462	1991	Female	77	White	Married (including common law)	Transverse Colon	8140/3: Adenocarcinoma, NOS	C18.4-Transverse colon	Moderately differentiated; Grade II	20	Blank(s)	Blank(s)	T3	Blank(s)	Blank(s)	N0	Blank(s)	Blank(s)	Blank(s)	Blank(s)	Blank(s)	Blank(s)	Blank(s)	Blank(s)	Blank(s)	Blank(s)	9	0	Blank(s)	No radiation and/or cancer-directed surgery	None	Alive or dead of other cause	Dead (attributable to causes other than this cancer dx)	26	Chronic Obstructive Pulmonary Disease and Allied Cond	One primary only	September	No/Unknown
1849486	1990	Male	64	White	Married (including common law)	Rectum	8140/3: Adenocarcinoma, NOS	C20.9-Rectum, NOS	Moderately differentiated; Grade II	10	Blank(s)	Blank(s)	T2	Blank(s)	Blank(s)	N0	Blank(s)	Blank(s)	Blank(s)	Blank(s)	Blank(s)	Blank(s)	Blank(s)	Blank(s)	Blank(s)	Blank(s)	13	0	Blank(s)	No radiation and/or cancer-directed surgery	None	Alive or dead of other cause	Dead (attributable to causes other than this cancer dx)	239	Diseases of Heart	One primary only	September	No/Unknown
1849527	1991	Male	65	White	Single (never married)	Hepatic Flexure	8480/3: Mucinous adenocarcinoma	C18.3-Hepatic flexure of colon	Moderately differentiated; Grade II	20	Blank(s)	Blank(s)	T3	Blank(s)	Blank(s)	N0	Blank(s)	Blank(s)	Blank(s)	Blank(s)	Blank(s)	Blank(s)	Blank(s)	Blank(s)	Blank(s)	Blank(s)	9	0	Blank(s)	No radiation and/or cancer-directed surgery	None	Alive or dead of other cause	Dead (attributable to causes other than this cancer dx)	16	Other Infectious and Parasitic Diseases including HIV	One primary only	May	No/Unknown
1849617	1988	Female	75	Asian or Pacific Islander	Widowed	Sigmoid Colon	8140/3: Adenocarcinoma, NOS	C18.7-Sigmoid colon	Moderately differentiated; Grade II	20	Blank(s)	Blank(s)	T3	Blank(s)	Blank(s)	N0	Blank(s)	Blank(s)	Blank(s)	Blank(s)	Blank(s)	Blank(s)	Blank(s)	Blank(s)	Blank(s)	Blank(s)	98	0	Blank(s)	No radiation and/or cancer-directed surgery	None	Alive or dead of other cause	Dead (attributable to causes other than this cancer dx)	137	Cerebrovascular Diseases	One primary only	July	No/Unknown
1849771	1989	Male	76	White	Married (including common law)	Ascending Colon	8140/3: Adenocarcinoma, NOS	C18.2-Ascending colon	Moderately differentiated; Grade II	20	Blank(s)	Blank(s)	T4	Blank(s)	Blank(s)	N0	Blank(s)	Blank(s)	Blank(s)	Blank(s)	Blank(s)	Blank(s)	Blank(s)	Blank(s)	Blank(s)	Blank(s)	10	0	Blank(s)	No radiation and/or cancer-directed surgery	None	Dead (attributable to this cancer dx)	Alive or dead due to cancer	17	Colon excluding Rectum	One primary only	November	No/Unknown
1849821	1990	Male	76	White	Married (including common law)	Ascending Colon	8140/3: Adenocarcinoma, NOS	C18.2-Ascending colon	Poorly differentiated; Grade III	20	Blank(s)	Blank(s)	T3	Blank(s)	Blank(s)	N0	Blank(s)	Blank(s)	Blank(s)	Blank(s)	Blank(s)	Blank(s)	Blank(s)	Blank(s)	Blank(s)	Blank(s)	10	0	Blank(s)	No radiation and/or cancer-directed surgery	None	Alive or dead of other cause	Dead (attributable to causes other than this cancer dx)	72	Diseases of Heart	One primary only	January	No/Unknown
1849869	1991	Male	68	White	Married (including common law)	Sigmoid Colon	8140/3: Adenocarcinoma, NOS	C18.7-Sigmoid colon	Poorly differentiated; Grade III	10	Blank(s)	Blank(s)	T2	Blank(s)	Blank(s)	N0	Blank(s)	Blank(s)	Blank(s)	Blank(s)	Blank(s)	Blank(s)	Blank(s)	Blank(s)	Blank(s)	Blank(s)	7	0	Blank(s)	No radiation and/or cancer-directed surgery	None	Alive or dead of other cause	Dead (attributable to causes other than this cancer dx)	200	Accidents and Adverse Effects	One primary only	June	No/Unknown
1850011	1991	Male	72	Asian or Pacific Islander	Married (including common law)	Rectosigmoid Junction	8140/3: Adenocarcinoma, NOS	C19.9-Rectosigmoid junction	Moderately differentiated; Grade II	30	Blank(s)	Blank(s)	T3	Blank(s)	Blank(s)	N1	Blank(s)	Blank(s)	Blank(s)	Blank(s)	Blank(s)	Blank(s)	Blank(s)	Blank(s)	Blank(s)	Blank(s)	10	3	Blank(s)	No radiation and/or cancer-directed surgery	None	Dead (attributable to this cancer dx)	Alive or dead due to cancer	43	Colon excluding Rectum	One primary only	July	No/Unknown
1850042	1990	Male	73	White	Married (including common law)	Rectum	8140/3: Adenocarcinoma, NOS	C20.9-Rectum, NOS	Poorly differentiated; Grade III	10	Blank(s)	Blank(s)	T2	Blank(s)	Blank(s)	N0	Blank(s)	Blank(s)	Blank(s)	Blank(s)	Blank(s)	Blank(s)	Blank(s)	Blank(s)	Blank(s)	Blank(s)	8	0	Blank(s)	No radiation and/or cancer-directed surgery	None	Dead (attributable to this cancer dx)	Alive or dead due to cancer	174	Other Cause of Death	One primary only	February	No/Unknown
1850061	1989	Male	49	White	Married (including common law)	Rectum	8140/3: Adenocarcinoma, NOS	C20.9-Rectum, NOS	Poorly differentiated; Grade III	20	Blank(s)	Blank(s)	T3	Blank(s)	Blank(s)	N0	Blank(s)	Blank(s)	Blank(s)	Blank(s)	Blank(s)	Blank(s)	Blank(s)	Blank(s)	Blank(s)	Blank(s)	4	0	Blank(s)	No radiation and/or cancer-directed surgery	Recommended, unknown if administered	Dead (attributable to this cancer dx)	Alive or dead due to cancer	8	Rectum and Rectosigmoid Junction	One primary only	April	No/Unknown
1850196	1990	Male	80	White	Widowed	Rectum	8140/3: Adenocarcinoma, NOS	C20.9-Rectum, NOS	Moderately differentiated; Grade II	30	Blank(s)	Blank(s)	T3	Blank(s)	Blank(s)	N2	Blank(s)	Blank(s)	Blank(s)	Blank(s)	Blank(s)	Blank(s)	Blank(s)	Blank(s)	Blank(s)	Blank(s)	12	12	Blank(s)	Radiation after surgery	Beam radiation	Dead (attributable to this cancer dx)	Alive or dead due to cancer	17	Rectum and Rectosigmoid Junction	One primary only	September	No/Unknown
1850204	1988	Male	73	White	Married (including common law)	Cecum	8140/3: Adenocarcinoma, NOS	C18.0-Cecum	Moderately differentiated; Grade II	20	Blank(s)	Blank(s)	T4	Blank(s)	Blank(s)	N0	Blank(s)	Blank(s)	Blank(s)	Blank(s)	Blank(s)	Blank(s)	Blank(s)	Blank(s)	Blank(s)	Blank(s)	0	98	Blank(s)	No radiation and/or cancer-directed surgery	None	Dead (attributable to this cancer dx)	Alive or dead due to cancer	34	Colon excluding Rectum	One primary only	November	Yes
1850237	1991	Female	68	White	Married (including common law)	Rectum	8140/3: Adenocarcinoma, NOS	C20.9-Rectum, NOS	Moderately differentiated; Grade II	20	Blank(s)	Blank(s)	T4	Blank(s)	Blank(s)	N0	Blank(s)	Blank(s)	Blank(s)	Blank(s)	Blank(s)	Blank(s)	Blank(s)	Blank(s)	Blank(s)	Blank(s)	10	0	Blank(s)	Radiation after surgery	Beam radiation	Dead (attributable to this cancer dx)	Alive or dead due to cancer	13	Colon excluding Rectum	One primary only	July	Yes
1850314	1991	Male	69	White	Married (including common law)	Ascending Colon	8140/3: Adenocarcinoma, NOS	C18.2-Ascending colon	Moderately differentiated; Grade II	10	Blank(s)	Blank(s)	T2	Blank(s)	Blank(s)	N0	Blank(s)	Blank(s)	Blank(s)	Blank(s)	Blank(s)	Blank(s)	Blank(s)	Blank(s)	Blank(s)	Blank(s)	7	0	Blank(s)	No radiation and/or cancer-directed surgery	None	Dead (attributable to this cancer dx)	Alive or dead due to cancer	40	Colon excluding Rectum	One primary only	August	No/Unknown
1850501	1989	Male	78	White	Married (including common law)	Sigmoid Colon	8140/3: Adenocarcinoma, NOS	C18.7-Sigmoid colon	Well differentiated; Grade I	10	Blank(s)	Blank(s)	T2	Blank(s)	Blank(s)	N0	Blank(s)	Blank(s)	Blank(s)	Blank(s)	Blank(s)	Blank(s)	Blank(s)	Blank(s)	Blank(s)	Blank(s)	11	0	Blank(s)	No radiation and/or cancer-directed surgery	None	Alive or dead of other cause	Dead (attributable to causes other than this cancer dx)	145	Diseases of Heart	One primary only	March	No/Unknown
1850786	1991	Male	57	Black	Married (including common law)	Rectum	8140/3: Adenocarcinoma, NOS	C20.9-Rectum, NOS	Moderately differentiated; Grade II	30	Blank(s)	Blank(s)	T3	Blank(s)	Blank(s)	N1	Blank(s)	Blank(s)	Blank(s)	Blank(s)	Blank(s)	Blank(s)	Blank(s)	Blank(s)	Blank(s)	Blank(s)	22	2	Blank(s)	Radiation after surgery	Beam radiation	Alive or dead of other cause	Alive or dead due to cancer	274	Alive	One primary only	February	Yes
1850815	1990	Female	54	White	Married (including common law)	Sigmoid Colon	8140/3: Adenocarcinoma, NOS	C18.7-Sigmoid colon	Well differentiated; Grade I	20	Blank(s)	Blank(s)	T3	Blank(s)	Blank(s)	N0	Blank(s)	Blank(s)	Blank(s)	Blank(s)	Blank(s)	Blank(s)	Blank(s)	Blank(s)	Blank(s)	Blank(s)	2	0	Blank(s)	No radiation and/or cancer-directed surgery	None	Dead (attributable to this cancer dx)	Alive or dead due to cancer	28	Rectum and Rectosigmoid Junction	One primary only	November	No/Unknown
1850908	1991	Male	51	White	Married (including common law)	Rectum	8140/3: Adenocarcinoma, NOS	C20.9-Rectum, NOS	Moderately differentiated; Grade II	20	Blank(s)	Blank(s)	T3	Blank(s)	Blank(s)	N0	Blank(s)	Blank(s)	Blank(s)	Blank(s)	Blank(s)	Blank(s)	Blank(s)	Blank(s)	Blank(s)	Blank(s)	13	0	Blank(s)	Radiation after surgery	Beam radiation	Alive or dead of other cause	Alive or dead due to cancer	268	Alive	One primary only	August	No/Unknown
1851135	1989	Female	78	White	Widowed	Cecum	8140/3: Adenocarcinoma, NOS	C18.0-Cecum	Moderately differentiated; Grade II	20	Blank(s)	Blank(s)	T3	Blank(s)	Blank(s)	N0	Blank(s)	Blank(s)	Blank(s)	Blank(s)	Blank(s)	Blank(s)	Blank(s)	Blank(s)	Blank(s)	Blank(s)	8	0	Blank(s)	No radiation and/or cancer-directed surgery	None	Alive or dead of other cause	Dead (attributable to causes other than this cancer dx)	188	Diseases of Heart	One primary only	January	No/Unknown
1851208	1990	Female	73	White	Divorced	Rectum	8140/3: Adenocarcinoma, NOS	C20.9-Rectum, NOS	Moderately differentiated; Grade II	20	Blank(s)	Blank(s)	T3	Blank(s)	Blank(s)	N0	Blank(s)	Blank(s)	Blank(s)	Blank(s)	Blank(s)	Blank(s)	Blank(s)	Blank(s)	Blank(s)	Blank(s)	17	0	Blank(s)	No radiation and/or cancer-directed surgery	None	Dead (attributable to this cancer dx)	Alive or dead due to cancer	44	Colon excluding Rectum	One primary only	August	No/Unknown
1851210	1990	Female	75	White	Married (including common law)	Cecum	8140/3: Adenocarcinoma, NOS	C18.0-Cecum	Poorly differentiated; Grade III	30	Blank(s)	Blank(s)	T4	Blank(s)	Blank(s)	N1	Blank(s)	Blank(s)	Blank(s)	Blank(s)	Blank(s)	Blank(s)	Blank(s)	Blank(s)	Blank(s)	Blank(s)	6	2	Blank(s)	No radiation and/or cancer-directed surgery	None	Dead (attributable to this cancer dx)	Alive or dead due to cancer	12	Colon excluding Rectum	One primary only	March	No/Unknown
1851272	1991	Male	56	White	Married (including common law)	Transverse Colon	8480/3: Mucinous adenocarcinoma	C18.4-Transverse colon	Poorly differentiated; Grade III	20	Blank(s)	Blank(s)	T4	Blank(s)	Blank(s)	N0	Blank(s)	Blank(s)	Blank(s)	Blank(s)	Blank(s)	Blank(s)	Blank(s)	Blank(s)	Blank(s)	Blank(s)	6	0	Blank(s)	No radiation and/or cancer-directed surgery	None	Alive or dead of other cause	Dead (attributable to causes other than this cancer dx)	244	Diseases of Heart	One primary only	November	No/Unknown
1851300	1988	Female	73	White	Single (never married)	Ascending Colon	8140/3: Adenocarcinoma, NOS	C18.2-Ascending colon	Poorly differentiated; Grade III	20	Blank(s)	Blank(s)	T3	Blank(s)	Blank(s)	N0	Blank(s)	Blank(s)	Blank(s)	Blank(s)	Blank(s)	Blank(s)	Blank(s)	Blank(s)	Blank(s)	Blank(s)	16	0	Blank(s)	No radiation and/or cancer-directed surgery	None	Alive or dead of other cause	Dead (attributable to causes other than this cancer dx)	203	Diseases of Heart	One primary only	July	No/Unknown
1851320	1991	Male	76	White	Married (including common law)	Transverse Colon	8140/3: Adenocarcinoma, NOS	C18.4-Transverse colon	Moderately differentiated; Grade II	20	Blank(s)	Blank(s)	T4	Blank(s)	Blank(s)	N0	Blank(s)	Blank(s)	Blank(s)	Blank(s)	Blank(s)	Blank(s)	Blank(s)	Blank(s)	Blank(s)	Blank(s)	14	0	Blank(s)	No radiation and/or cancer-directed surgery	None	Alive or dead of other cause	Dead (attributable to causes other than this cancer dx)	130	Alzheimers (ICD-9 and 10 only)	One primary only	November	No/Unknown
1851330	1991	Female	58	White	Widowed	Transverse Colon	8140/3: Adenocarcinoma, NOS	C18.4-Transverse colon	Moderately differentiated; Grade II	10	Blank(s)	Blank(s)	T2	Blank(s)	Blank(s)	N0	Blank(s)	Blank(s)	Blank(s)	Blank(s)	Blank(s)	Blank(s)	Blank(s)	Blank(s)	Blank(s)	Blank(s)	22	0	Blank(s)	No radiation and/or cancer-directed surgery	None	Alive or dead of other cause	Dead (attributable to causes other than this cancer dx)	145	Diseases of Heart	One primary only	December	No/Unknown
1851375	1988	Male	64	White	Widowed	Rectosigmoid Junction	8140/3: Adenocarcinoma, NOS	C19.9-Rectosigmoid junction	Moderately differentiated; Grade II	20	Blank(s)	Blank(s)	T3	Blank(s)	Blank(s)	N0	Blank(s)	Blank(s)	Blank(s)	Blank(s)	Blank(s)	Blank(s)	Blank(s)	Blank(s)	Blank(s)	Blank(s)	6	0	Blank(s)	No radiation and/or cancer-directed surgery	None	Alive or dead of other cause	Dead (attributable to causes other than this cancer dx)	107	Diseases of Heart	One primary only	July	No/Unknown
1851435	1989	Female	77	Black	Single (never married)	Sigmoid Colon	8481/3: Mucin-producing adenocarcinoma	C18.7-Sigmoid colon	Moderately differentiated; Grade II	10	Blank(s)	Blank(s)	T2	Blank(s)	Blank(s)	N0	Blank(s)	Blank(s)	Blank(s)	Blank(s)	Blank(s)	Blank(s)	Blank(s)	Blank(s)	Blank(s)	Blank(s)	5	0	Blank(s)	No radiation and/or cancer-directed surgery	None	Alive or dead of other cause	Dead (attributable to causes other than this cancer dx)	97	Diseases of Heart	One primary only	February	No/Unknown
1851699	1991	Female	64	White	Married (including common law)	Cecum	8140/3: Adenocarcinoma, NOS	C18.0-Cecum	Well differentiated; Grade I	10	Blank(s)	Blank(s)	T1	Blank(s)	Blank(s)	N0	Blank(s)	Blank(s)	Blank(s)	Blank(s)	Blank(s)	Blank(s)	Blank(s)	Blank(s)	Blank(s)	Blank(s)	1	0	Blank(s)	No radiation and/or cancer-directed surgery	None	Alive or dead of other cause	Alive or dead due to cancer	268	Alive	One primary only	August	No/Unknown
1851762	1991	Male	54	White	Divorced	Rectum	8140/3: Adenocarcinoma, NOS	C20.9-Rectum, NOS	Poorly differentiated; Grade III	30	Blank(s)	Blank(s)	T3	Blank(s)	Blank(s)	N2	Blank(s)	Blank(s)	Blank(s)	Blank(s)	Blank(s)	Blank(s)	Blank(s)	Blank(s)	Blank(s)	Blank(s)	13	7	Blank(s)	Radiation after surgery	Beam radiation	Alive or dead of other cause	Alive or dead due to cancer	266	Alive	One primary only	October	Yes
1851838	1991	Male	69	White	Married (including common law)	Ascending Colon	8140/3: Adenocarcinoma, NOS	C18.2-Ascending colon	Moderately differentiated; Grade II	20	Blank(s)	Blank(s)	T3	Blank(s)	Blank(s)	N0	Blank(s)	Blank(s)	Blank(s)	Blank(s)	Blank(s)	Blank(s)	Blank(s)	Blank(s)	Blank(s)	Blank(s)	0	98	Blank(s)	No radiation and/or cancer-directed surgery	None	Alive or dead of other cause	Dead (attributable to causes other than this cancer dx)	186	Cerebrovascular Diseases	One primary only	November	No/Unknown
1851919	1991	Female	55	White	Married (including common law)	Sigmoid Colon	8481/3: Mucin-producing adenocarcinoma	C18.7-Sigmoid colon	Well differentiated; Grade I	20	Blank(s)	Blank(s)	T3	Blank(s)	Blank(s)	N0	Blank(s)	Blank(s)	Blank(s)	Blank(s)	Blank(s)	Blank(s)	Blank(s)	Blank(s)	Blank(s)	Blank(s)	13	0	Blank(s)	No radiation and/or cancer-directed surgery	None	Alive or dead of other cause	Alive or dead due to cancer	265	Alive	One primary only	November	Yes
1851929	1990	Male	36	White	Married (including common law)	Cecum	8140/3: Adenocarcinoma, NOS	C18.0-Cecum	Poorly differentiated; Grade III	30	Blank(s)	Blank(s)	T3	Blank(s)	Blank(s)	N3	Blank(s)	Blank(s)	Blank(s)	Blank(s)	Blank(s)	Blank(s)	Blank(s)	Blank(s)	Blank(s)	Blank(s)	21	1	Blank(s)	No radiation and/or cancer-directed surgery	None	Alive or dead of other cause	Alive or dead due to cancer	281	Alive	One primary only	July	Yes
1851998	1990	Male	63	White	Single (never married)	Sigmoid Colon	8480/3: Mucinous adenocarcinoma	C18.7-Sigmoid colon	Moderately differentiated; Grade II	10	Blank(s)	Blank(s)	T2	Blank(s)	Blank(s)	N0	Blank(s)	Blank(s)	Blank(s)	Blank(s)	Blank(s)	Blank(s)	Blank(s)	Blank(s)	Blank(s)	Blank(s)	3	0	Blank(s)	No radiation and/or cancer-directed surgery	None	Alive or dead of other cause	Alive or dead due to cancer	278	Alive	One primary only	October	No/Unknown
1852008	1991	Male	79	White	Married (including common law)	Rectum	8140/3: Adenocarcinoma, NOS	C20.9-Rectum, NOS	Moderately differentiated; Grade II	20	Blank(s)	Blank(s)	T3	Blank(s)	Blank(s)	N0	Blank(s)	Blank(s)	Blank(s)	Blank(s)	Blank(s)	Blank(s)	Blank(s)	Blank(s)	Blank(s)	Blank(s)	2	0	Blank(s)	Radiation after surgery	Beam radiation	Alive or dead of other cause	Dead (attributable to causes other than this cancer dx)	170	Diseases of Heart	One primary only	October	Yes
1852092	1990	Male	80	White	Married (including common law)	Sigmoid Colon	8140/3: Adenocarcinoma, NOS	C18.7-Sigmoid colon	Moderately differentiated; Grade II	30	Blank(s)	Blank(s)	T3	Blank(s)	Blank(s)	N1	Blank(s)	Blank(s)	Blank(s)	Blank(s)	Blank(s)	Blank(s)	Blank(s)	Blank(s)	Blank(s)	Blank(s)	10	1	Blank(s)	No radiation and/or cancer-directed surgery	None	Alive or dead of other cause	Dead (attributable to causes other than this cancer dx)	18	Other Cause of Death	One primary only	July	No/Unknown
1852120	1991	Female	80	Black	Widowed	Cecum	8140/3: Adenocarcinoma, NOS	C18.0-Cecum	Moderately differentiated; Grade II	20	Blank(s)	Blank(s)	T3	Blank(s)	Blank(s)	N0	Blank(s)	Blank(s)	Blank(s)	Blank(s)	Blank(s)	Blank(s)	Blank(s)	Blank(s)	Blank(s)	Blank(s)	19	0	Blank(s)	No radiation and/or cancer-directed surgery	None	Dead (attributable to this cancer dx)	Alive or dead due to cancer	27	Colon excluding Rectum	One primary only	November	No/Unknown
1852255	1989	Female	80	White	Widowed	Rectum	8140/3: Adenocarcinoma, NOS	C20.9-Rectum, NOS	Moderately differentiated; Grade II	20	Blank(s)	Blank(s)	T3	Blank(s)	Blank(s)	N0	Blank(s)	Blank(s)	Blank(s)	Blank(s)	Blank(s)	Blank(s)	Blank(s)	Blank(s)	Blank(s)	Blank(s)	4	0	Blank(s)	No radiation and/or cancer-directed surgery	None	Dead (attributable to this cancer dx)	Alive or dead due to cancer	42	Colon excluding Rectum	One primary only	April	No/Unknown
1852512	1991	Female	76	White	Single (never married)	Cecum	8481/3: Mucin-producing adenocarcinoma	C18.0-Cecum	Moderately differentiated; Grade II	20	Blank(s)	Blank(s)	T3	Blank(s)	Blank(s)	N0	Blank(s)	Blank(s)	Blank(s)	Blank(s)	Blank(s)	Blank(s)	Blank(s)	Blank(s)	Blank(s)	Blank(s)	14	0	Blank(s)	No radiation and/or cancer-directed surgery	None	Alive or dead of other cause	Dead (attributable to causes other than this cancer dx)	159	Cerebrovascular Diseases	One primary only	October	No/Unknown
1852603	1989	Male	71	White	Married (including common law)	Sigmoid Colon	8140/3: Adenocarcinoma, NOS	C18.7-Sigmoid colon	Moderately differentiated; Grade II	20	Blank(s)	Blank(s)	T4	Blank(s)	Blank(s)	N0	Blank(s)	Blank(s)	Blank(s)	Blank(s)	Blank(s)	Blank(s)	Blank(s)	Blank(s)	Blank(s)	Blank(s)	4	0	Blank(s)	Radiation after surgery	Beam radiation	Dead (attributable to this cancer dx)	Alive or dead due to cancer	61	Colon excluding Rectum	One primary only	May	Yes
1852635	1989	Female	68	White	Married (including common law)	Descending Colon	8140/3: Adenocarcinoma, NOS	C18.6-Descending colon	Poorly differentiated; Grade III	20	Blank(s)	Blank(s)	T3	Blank(s)	Blank(s)	N0	Blank(s)	Blank(s)	Blank(s)	Blank(s)	Blank(s)	Blank(s)	Blank(s)	Blank(s)	Blank(s)	Blank(s)	11	0	Blank(s)	No radiation and/or cancer-directed surgery	None	Alive or dead of other cause	Dead (attributable to causes other than this cancer dx)	6	Accidents and Adverse Effects	One primary only	March	No/Unknown
1852649	1990	Male	61	Asian or Pacific Islander	Married (including common law)	Sigmoid Colon	8140/3: Adenocarcinoma, NOS	C18.7-Sigmoid colon	Poorly differentiated; Grade III	30	Blank(s)	Blank(s)	T4	Blank(s)	Blank(s)	N1	Blank(s)	Blank(s)	Blank(s)	Blank(s)	Blank(s)	Blank(s)	Blank(s)	Blank(s)	Blank(s)	Blank(s)	25	1	Blank(s)	Radiation after surgery	Beam radiation	Alive or dead of other cause	Alive or dead due to cancer	278	Alive	One primary only	October	Yes
1852985	1991	Male	67	White	Married (including common law)	Sigmoid Colon	8140/3: Adenocarcinoma, NOS	C18.7-Sigmoid colon	Poorly differentiated; Grade III	20	Blank(s)	Blank(s)	T3	Blank(s)	Blank(s)	N0	Blank(s)	Blank(s)	Blank(s)	Blank(s)	Blank(s)	Blank(s)	Blank(s)	Blank(s)	Blank(s)	Blank(s)	2	0	Blank(s)	No radiation and/or cancer-directed surgery	None	Alive or dead of other cause	Dead (attributable to causes other than this cancer dx)	131	Pneumonia and Influenza	One primary only	May	Yes
1853058	1990	Male	66	Black	Widowed	Sigmoid Colon	8480/3: Mucinous adenocarcinoma	C18.7-Sigmoid colon	Moderately differentiated; Grade II	20	Blank(s)	Blank(s)	T4	Blank(s)	Blank(s)	N0	Blank(s)	Blank(s)	Blank(s)	Blank(s)	Blank(s)	Blank(s)	Blank(s)	Blank(s)	Blank(s)	Blank(s)	8	0	Blank(s)	Radiation after surgery	Beam radiation	Alive or dead of other cause	Dead (attributable to causes other than this cancer dx)	181	Diseases of Heart	One primary only	November	No/Unknown
1853105	1989	Male	59	White	Married (including common law)	Sigmoid Colon	8140/3: Adenocarcinoma, NOS	C18.7-Sigmoid colon	Moderately differentiated; Grade II	30	Blank(s)	Blank(s)	T3	Blank(s)	Blank(s)	N2	Blank(s)	Blank(s)	Blank(s)	Blank(s)	Blank(s)	Blank(s)	Blank(s)	Blank(s)	Blank(s)	Blank(s)	11	5	Blank(s)	No radiation and/or cancer-directed surgery	None	Alive or dead of other cause	Alive or dead due to cancer	296	Alive	One primary only	April	No/Unknown
1853337	1991	Male	74	White	Unknown	Rectum	8140/3: Adenocarcinoma, NOS	C20.9-Rectum, NOS	Moderately differentiated; Grade II	20	Blank(s)	Blank(s)	T3	Blank(s)	Blank(s)	N0	Blank(s)	Blank(s)	Blank(s)	Blank(s)	Blank(s)	Blank(s)	Blank(s)	Blank(s)	Blank(s)	Blank(s)	6	0	Blank(s)	Radiation after surgery	Beam radiation	Dead (attributable to this cancer dx)	Alive or dead due to cancer	51	Colon excluding Rectum	One primary only	March	Yes
1853367	1991	Female	65	White	Married (including common law)	Sigmoid Colon	8140/3: Adenocarcinoma, NOS	C18.7-Sigmoid colon	Poorly differentiated; Grade III	30	Blank(s)	Blank(s)	T4	Blank(s)	Blank(s)	N1	Blank(s)	Blank(s)	Blank(s)	Blank(s)	Blank(s)	Blank(s)	Blank(s)	Blank(s)	Blank(s)	Blank(s)	6	1	Blank(s)	No radiation and/or cancer-directed surgery	None	Alive or dead of other cause	Dead (attributable to causes other than this cancer dx)	262	Other Cause of Death	One primary only	October	No/Unknown
1853482	1991	Male	67	White	Married (including common law)	Splenic Flexure	8140/3: Adenocarcinoma, NOS	C18.5-Splenic flexure of colon	Moderately differentiated; Grade II	20	Blank(s)	Blank(s)	T3	Blank(s)	Blank(s)	N0	Blank(s)	Blank(s)	Blank(s)	Blank(s)	Blank(s)	Blank(s)	Blank(s)	Blank(s)	Blank(s)	Blank(s)	10	0	Blank(s)	No radiation and/or cancer-directed surgery	None	Alive or dead of other cause	Dead (attributable to causes other than this cancer dx)	207	Diseases of Heart	One primary only	November	Yes
1853672	1989	Male	59	White	Married (including common law)	Sigmoid Colon	8140/3: Adenocarcinoma, NOS	C18.7-Sigmoid colon	Moderately differentiated; Grade II	20	Blank(s)	Blank(s)	T3	Blank(s)	Blank(s)	N0	Blank(s)	Blank(s)	Blank(s)	Blank(s)	Blank(s)	Blank(s)	Blank(s)	Blank(s)	Blank(s)	Blank(s)	9	0	Blank(s)	No radiation and/or cancer-directed surgery	None	Alive or dead of other cause	Alive or dead due to cancer	293	Alive	One primary only	July	No/Unknown
1853804	1990	Male	53	Asian or Pacific Islander	Married (including common law)	Sigmoid Colon	8140/3: Adenocarcinoma, NOS	C18.7-Sigmoid colon	Moderately differentiated; Grade II	20	Blank(s)	Blank(s)	T4	Blank(s)	Blank(s)	N0	Blank(s)	Blank(s)	Blank(s)	Blank(s)	Blank(s)	Blank(s)	Blank(s)	Blank(s)	Blank(s)	Blank(s)	7	0	Blank(s)	No radiation and/or cancer-directed surgery	None	Alive or dead of other cause	Alive or dead due to cancer	280	Alive	One primary only	August	No/Unknown
1853809	1988	Female	38	Black	Separated	Hepatic Flexure	8140/3: Adenocarcinoma, NOS	C18.3-Hepatic flexure of colon	Moderately differentiated; Grade II	20	Blank(s)	Blank(s)	T3	Blank(s)	Blank(s)	N0	Blank(s)	Blank(s)	Blank(s)	Blank(s)	Blank(s)	Blank(s)	Blank(s)	Blank(s)	Blank(s)	Blank(s)	19	0	Blank(s)	No radiation and/or cancer-directed surgery	None	Alive or dead of other cause	Dead (attributable to causes other than this cancer dx)	122	Other Infectious and Parasitic Diseases including HIV	One primary only	January	No/Unknown
1853892	1991	Male	46	White	Divorced	Rectum	8140/3: Adenocarcinoma, NOS	C20.9-Rectum, NOS	Moderately differentiated; Grade II	10	Blank(s)	Blank(s)	T2	Blank(s)	Blank(s)	N0	Blank(s)	Blank(s)	Blank(s)	Blank(s)	Blank(s)	Blank(s)	Blank(s)	Blank(s)	Blank(s)	Blank(s)	11	0	Blank(s)	Intraoperative rad with other rad before/after surgery	Beam radiation	Alive or dead of other cause	Alive or dead due to cancer	194	Alive	One primary only	May	Yes
1853917	1988	Female	60	White	Widowed	Sigmoid Colon	8140/3: Adenocarcinoma, NOS	C18.7-Sigmoid colon	Moderately differentiated; Grade II	20	Blank(s)	Blank(s)	T3	Blank(s)	Blank(s)	N0	Blank(s)	Blank(s)	Blank(s)	Blank(s)	Blank(s)	Blank(s)	Blank(s)	Blank(s)	Blank(s)	Blank(s)	22	0	Blank(s)	No radiation and/or cancer-directed surgery	None	Alive or dead of other cause	Dead (attributable to causes other than this cancer dx)	165	Septicemia	One primary only	July	No/Unknown
1854065	1990	Female	37	Asian or Pacific Islander	Married (including common law)	Rectum	8140/3: Adenocarcinoma, NOS	C20.9-Rectum, NOS	Moderately differentiated; Grade II	10	Blank(s)	Blank(s)	T2	Blank(s)	Blank(s)	N0	Blank(s)	Blank(s)	Blank(s)	Blank(s)	Blank(s)	Blank(s)	Blank(s)	Blank(s)	Blank(s)	Blank(s)	15	0	Blank(s)	No radiation and/or cancer-directed surgery	None	Alive or dead of other cause	Alive or dead due to cancer	236	Alive	One primary only	August	Yes
1854083	1991	Male	79	Black	Married (including common law)	Ascending Colon	8140/3: Adenocarcinoma, NOS	C18.2-Ascending colon	Moderately differentiated; Grade II	20	Blank(s)	Blank(s)	T3	Blank(s)	Blank(s)	N0	Blank(s)	Blank(s)	Blank(s)	Blank(s)	Blank(s)	Blank(s)	Blank(s)	Blank(s)	Blank(s)	Blank(s)	11	0	Blank(s)	No radiation and/or cancer-directed surgery	None	Alive or dead of other cause	Dead (attributable to causes other than this cancer dx)	51	Diseases of Heart	One primary only	July	No/Unknown
1854085	1991	Male	56	White	Married (including common law)	Rectum	8140/3: Adenocarcinoma, NOS	C20.9-Rectum, NOS	Moderately differentiated; Grade II	20	Blank(s)	Blank(s)	T3	Blank(s)	Blank(s)	N0	Blank(s)	Blank(s)	Blank(s)	Blank(s)	Blank(s)	Blank(s)	Blank(s)	Blank(s)	Blank(s)	Blank(s)	3	0	Blank(s)	Radiation after surgery	Beam radiation	Alive or dead of other cause	Alive or dead due to cancer	266	Alive	One primary only	October	Yes
1854139	1990	Male	62	White	Single (never married)	Rectum	8140/3: Adenocarcinoma, NOS	C20.9-Rectum, NOS	Moderately differentiated; Grade II	10	Blank(s)	Blank(s)	T2	Blank(s)	Blank(s)	N0	Blank(s)	Blank(s)	Blank(s)	Blank(s)	Blank(s)	Blank(s)	Blank(s)	Blank(s)	Blank(s)	Blank(s)	6	0	Blank(s)	No radiation and/or cancer-directed surgery	None	Dead (attributable to this cancer dx)	Alive or dead due to cancer	116	Rectum and Rectosigmoid Junction	One primary only	August	No/Unknown
1854169	1991	Female	55	White	Married (including common law)	Rectum	8140/3: Adenocarcinoma, NOS	C20.9-Rectum, NOS	Moderately differentiated; Grade II	20	Blank(s)	Blank(s)	T3	Blank(s)	Blank(s)	N0	Blank(s)	Blank(s)	Blank(s)	Blank(s)	Blank(s)	Blank(s)	Blank(s)	Blank(s)	Blank(s)	Blank(s)	14	0	Blank(s)	Radiation after surgery	Beam radiation	Alive or dead of other cause	Alive or dead due to cancer	266	Alive	One primary only	October	No/Unknown
1854178	1991	Female	79	White	Married (including common law)	Hepatic Flexure	8140/3: Adenocarcinoma, NOS	C18.3-Hepatic flexure of colon	Moderately differentiated; Grade II	20	Blank(s)	Blank(s)	T3	Blank(s)	Blank(s)	N0	Blank(s)	Blank(s)	Blank(s)	Blank(s)	Blank(s)	Blank(s)	Blank(s)	Blank(s)	Blank(s)	Blank(s)	1	0	Blank(s)	No radiation and/or cancer-directed surgery	None	Alive or dead of other cause	Dead (attributable to causes other than this cancer dx)	53	Diseases of Heart	One primary only	October	No/Unknown
1854195	1990	Female	66	White	Married (including common law)	Ascending Colon	8140/3: Adenocarcinoma, NOS	C18.2-Ascending colon	Moderately differentiated; Grade II	20	Blank(s)	Blank(s)	T3	Blank(s)	Blank(s)	N0	Blank(s)	Blank(s)	Blank(s)	Blank(s)	Blank(s)	Blank(s)	Blank(s)	Blank(s)	Blank(s)	Blank(s)	5	0	Blank(s)	No radiation and/or cancer-directed surgery	None	Alive or dead of other cause	Dead (attributable to causes other than this cancer dx)	33	Other Cause of Death	One primary only	February	No/Unknown
1854398	1991	Male	77	White	Married (including common law)	Splenic Flexure	8140/3: Adenocarcinoma, NOS	C18.5-Splenic flexure of colon	Moderately differentiated; Grade II	30	Blank(s)	Blank(s)	T4	Blank(s)	Blank(s)	N3	Blank(s)	Blank(s)	Blank(s)	Blank(s)	Blank(s)	Blank(s)	Blank(s)	Blank(s)	Blank(s)	Blank(s)	12	7	Blank(s)	Radiation after surgery	Beam radiation	Dead (attributable to this cancer dx)	Alive or dead due to cancer	7	Colon excluding Rectum	One primary only	July	Yes
1854486	1991	Female	70	Asian or Pacific Islander	Widowed	Rectum	8140/3: Adenocarcinoma, NOS	C20.9-Rectum, NOS	Moderately differentiated; Grade II	20	Blank(s)	Blank(s)	T3	Blank(s)	Blank(s)	N0	Blank(s)	Blank(s)	Blank(s)	Blank(s)	Blank(s)	Blank(s)	Blank(s)	Blank(s)	Blank(s)	Blank(s)	10	0	Blank(s)	Radiation after surgery	Beam radiation	Dead (attributable to this cancer dx)	Alive or dead due to cancer	223	Colon excluding Rectum	One primary only	September	No/Unknown
1854539	1989	Female	79	White	Widowed	Cecum	8140/3: Adenocarcinoma, NOS	C18.0-Cecum	Moderately differentiated; Grade II	20	Blank(s)	Blank(s)	T3	Blank(s)	Blank(s)	N0	Blank(s)	Blank(s)	Blank(s)	Blank(s)	Blank(s)	Blank(s)	Blank(s)	Blank(s)	Blank(s)	Blank(s)	21	0	Blank(s)	No radiation and/or cancer-directed surgery	None	Alive or dead of other cause	Dead (attributable to causes other than this cancer dx)	85	Diabetes Mellitus	One primary only	November	No/Unknown
1854544	1991	Male	55	White	Married (including common law)	Sigmoid Colon	8140/3: Adenocarcinoma, NOS	C18.7-Sigmoid colon	Moderately differentiated; Grade II	20	Blank(s)	Blank(s)	T4	Blank(s)	Blank(s)	N0	Blank(s)	Blank(s)	Blank(s)	Blank(s)	Blank(s)	Blank(s)	Blank(s)	Blank(s)	Blank(s)	Blank(s)	4	0	Blank(s)	Radiation after surgery	Beam radiation	Alive or dead of other cause	Dead (attributable to causes other than this cancer dx)	111	Diseases of Heart	One primary only	November	Yes
1854587	1990	Female	70	Black	Widowed	Rectum	8140/3: Adenocarcinoma, NOS	C20.9-Rectum, NOS	Moderately differentiated; Grade II	20	Blank(s)	Blank(s)	T3	Blank(s)	Blank(s)	N0	Blank(s)	Blank(s)	Blank(s)	Blank(s)	Blank(s)	Blank(s)	Blank(s)	Blank(s)	Blank(s)	Blank(s)	28	0	Blank(s)	Radiation after surgery	Beam radiation	Dead (attributable to this cancer dx)	Alive or dead due to cancer	194	Pancreas	One primary only	August	Yes
1854696	1990	Female	79	White	Widowed	Ascending Colon	8140/3: Adenocarcinoma, NOS	C18.2-Ascending colon	Moderately differentiated; Grade II	20	Blank(s)	Blank(s)	T3	Blank(s)	Blank(s)	N0	Blank(s)	Blank(s)	Blank(s)	Blank(s)	Blank(s)	Blank(s)	Blank(s)	Blank(s)	Blank(s)	Blank(s)	1	0	Blank(s)	No radiation and/or cancer-directed surgery	None	Alive or dead of other cause	Dead (attributable to causes other than this cancer dx)	122	Cerebrovascular Diseases	One primary only	October	No/Unknown
1854777	1988	Female	68	White	Widowed	Cecum	8140/3: Adenocarcinoma, NOS	C18.0-Cecum	Moderately differentiated; Grade II	20	Blank(s)	Blank(s)	T3	Blank(s)	Blank(s)	N0	Blank(s)	Blank(s)	Blank(s)	Blank(s)	Blank(s)	Blank(s)	Blank(s)	Blank(s)	Blank(s)	Blank(s)	36	0	Blank(s)	No radiation and/or cancer-directed surgery	None	Dead (attributable to this cancer dx)	Alive or dead due to cancer	38	Colon excluding Rectum	One primary only	December	No/Unknown
1854825	1988	Female	78	White	Married (including common law)	Cecum	8140/3: Adenocarcinoma, NOS	C18.0-Cecum	Moderately differentiated; Grade II	10	Blank(s)	Blank(s)	T2	Blank(s)	Blank(s)	N0	Blank(s)	Blank(s)	Blank(s)	Blank(s)	Blank(s)	Blank(s)	Blank(s)	Blank(s)	Blank(s)	Blank(s)	9	0	Blank(s)	No radiation and/or cancer-directed surgery	None	Alive or dead of other cause	Dead (attributable to causes other than this cancer dx)	9	Diseases of Heart	One primary only	September	No/Unknown
1855004	1991	Male	78	White	Divorced	Cecum	8140/3: Adenocarcinoma, NOS	C18.0-Cecum	Poorly differentiated; Grade III	30	Blank(s)	Blank(s)	T3	Blank(s)	Blank(s)	N3	Blank(s)	Blank(s)	Blank(s)	Blank(s)	Blank(s)	Blank(s)	Blank(s)	Blank(s)	Blank(s)	Blank(s)	8	4	Blank(s)	No radiation and/or cancer-directed surgery	None	Alive or dead of other cause	Dead (attributable to causes other than this cancer dx)	48	Diseases of Heart	One primary only	November	Yes
1855014	1990	Female	79	White	Widowed	Rectum	8140/3: Adenocarcinoma, NOS	C20.9-Rectum, NOS	Moderately differentiated; Grade II	10	Blank(s)	Blank(s)	T2	Blank(s)	Blank(s)	N0	Blank(s)	Blank(s)	Blank(s)	Blank(s)	Blank(s)	Blank(s)	Blank(s)	Blank(s)	Blank(s)	Blank(s)	7	0	Blank(s)	No radiation and/or cancer-directed surgery	None	Alive or dead of other cause	Dead (attributable to causes other than this cancer dx)	172	Other Cause of Death	One primary only	November	No/Unknown
1855020	1988	Male	39	White	Single (never married)	Sigmoid Colon	8140/3: Adenocarcinoma, NOS	C18.7-Sigmoid colon	Moderately differentiated; Grade II	20	Blank(s)	Blank(s)	T3	Blank(s)	Blank(s)	N0	Blank(s)	Blank(s)	Blank(s)	Blank(s)	Blank(s)	Blank(s)	Blank(s)	Blank(s)	Blank(s)	Blank(s)	6	0	Blank(s)	Radiation after surgery	Beam radiation	Alive or dead of other cause	Alive or dead due to cancer	286	Alive	One primary only	December	No/Unknown
1855045	1991	Female	64	White	Married (including common law)	Rectosigmoid Junction	8140/3: Adenocarcinoma, NOS	C19.9-Rectosigmoid junction	Moderately differentiated; Grade II	20	Blank(s)	Blank(s)	T3	Blank(s)	Blank(s)	N0	Blank(s)	Blank(s)	Blank(s)	Blank(s)	Blank(s)	Blank(s)	Blank(s)	Blank(s)	Blank(s)	Blank(s)	5	0	Blank(s)	Radiation after surgery	Beam radiation	Alive or dead of other cause	Dead (attributable to causes other than this cancer dx)	229	Pneumonia and Influenza	One primary only	September	Yes
1855076	1991	Male	78	White	Married (including common law)	Sigmoid Colon	8140/3: Adenocarcinoma, NOS	C18.7-Sigmoid colon	Moderately differentiated; Grade II	20	Blank(s)	Blank(s)	T3	Blank(s)	Blank(s)	N0	Blank(s)	Blank(s)	Blank(s)	Blank(s)	Blank(s)	Blank(s)	Blank(s)	Blank(s)	Blank(s)	Blank(s)	7	0	Blank(s)	No radiation and/or cancer-directed surgery	None	Dead (attributable to this cancer dx)	Alive or dead due to cancer	10	Colon excluding Rectum	One primary only	December	No/Unknown
1855124	1990	Male	80	Black	Married (including common law)	Sigmoid Colon	8140/3: Adenocarcinoma, NOS	C18.7-Sigmoid colon	Moderately differentiated; Grade II	30	Blank(s)	Blank(s)	T3	Blank(s)	Blank(s)	N1	Blank(s)	Blank(s)	Blank(s)	Blank(s)	Blank(s)	Blank(s)	Blank(s)	Blank(s)	Blank(s)	Blank(s)	6	2	Blank(s)	Radiation after surgery	Beam radiation	Dead (attributable to this cancer dx)	Alive or dead due to cancer	18	Colon excluding Rectum	One primary only	August	No/Unknown
1855256	1991	Female	76	White	Widowed	Sigmoid Colon	8140/3: Adenocarcinoma, NOS	C18.7-Sigmoid colon	Moderately differentiated; Grade II	20	Blank(s)	Blank(s)	T3	Blank(s)	Blank(s)	N0	Blank(s)	Blank(s)	Blank(s)	Blank(s)	Blank(s)	Blank(s)	Blank(s)	Blank(s)	Blank(s)	Blank(s)	14	0	Blank(s)	No radiation and/or cancer-directed surgery	None	Alive or dead of other cause	Dead (attributable to causes other than this cancer dx)	226	Alzheimers (ICD-9 and 10 only)	One primary only	January	No/Unknown
1855308	1988	Male	66	White	Married (including common law)	Rectum	8140/3: Adenocarcinoma, NOS	C20.9-Rectum, NOS	Moderately differentiated; Grade II	20	Blank(s)	Blank(s)	T4	Blank(s)	Blank(s)	N0	Blank(s)	Blank(s)	Blank(s)	Blank(s)	Blank(s)	Blank(s)	Blank(s)	Blank(s)	Blank(s)	Blank(s)	15	0	Blank(s)	No radiation and/or cancer-directed surgery	None	Alive or dead of other cause	Dead (attributable to causes other than this cancer dx)	249	Suicide and Self-Inflicted Injury	One primary only	November	No/Unknown
1855409	1990	Male	77	White	Married (including common law)	Cecum	8140/3: Adenocarcinoma, NOS	C18.0-Cecum	Moderately differentiated; Grade II	20	Blank(s)	Blank(s)	T3	Blank(s)	Blank(s)	N0	Blank(s)	Blank(s)	Blank(s)	Blank(s)	Blank(s)	Blank(s)	Blank(s)	Blank(s)	Blank(s)	Blank(s)	6	0	Blank(s)	No radiation and/or cancer-directed surgery	None	Alive or dead of other cause	Dead (attributable to causes other than this cancer dx)	119	Diseases of Heart	One primary only	March	No/Unknown
1855634	1990	Female	68	White	Married (including common law)	Ascending Colon	8140/3: Adenocarcinoma, NOS	C18.2-Ascending colon	Moderately differentiated; Grade II	20	Blank(s)	Blank(s)	T3	Blank(s)	Blank(s)	N0	Blank(s)	Blank(s)	Blank(s)	Blank(s)	Blank(s)	Blank(s)	Blank(s)	Blank(s)	Blank(s)	Blank(s)	18	0	Blank(s)	No radiation and/or cancer-directed surgery	None	Alive or dead of other cause	Dead (attributable to causes other than this cancer dx)	220	Other Cause of Death	One primary only	January	No/Unknown
1855753	1989	Female	79	Black	Widowed	Rectosigmoid Junction	8140/3: Adenocarcinoma, NOS	C19.9-Rectosigmoid junction	Moderately differentiated; Grade II	20	Blank(s)	Blank(s)	T3	Blank(s)	Blank(s)	N0	Blank(s)	Blank(s)	Blank(s)	Blank(s)	Blank(s)	Blank(s)	Blank(s)	Blank(s)	Blank(s)	Blank(s)	16	0	Blank(s)	No radiation and/or cancer-directed surgery	Refused	Dead (attributable to this cancer dx)	Alive or dead due to cancer	4	Colon excluding Rectum	One primary only	March	No/Unknown
1855770	1989	Female	58	White	Widowed	Cecum	8140/3: Adenocarcinoma, NOS	C18.0-Cecum	Moderately differentiated; Grade II	30	Blank(s)	Blank(s)	T3	Blank(s)	Blank(s)	N1	Blank(s)	Blank(s)	Blank(s)	Blank(s)	Blank(s)	Blank(s)	Blank(s)	Blank(s)	Blank(s)	Blank(s)	17	2	Blank(s)	No radiation and/or cancer-directed surgery	None	Dead (attributable to this cancer dx)	Alive or dead due to cancer	34	Colon excluding Rectum	One primary only	May	No/Unknown
1855862	1991	Male	77	White	Married (including common law)	Rectum	8140/3: Adenocarcinoma, NOS	C20.9-Rectum, NOS	Moderately differentiated; Grade II	10	Blank(s)	Blank(s)	T2	Blank(s)	Blank(s)	N0	Blank(s)	Blank(s)	Blank(s)	Blank(s)	Blank(s)	Blank(s)	Blank(s)	Blank(s)	Blank(s)	Blank(s)	12	0	Blank(s)	No radiation and/or cancer-directed surgery	None	Alive or dead of other cause	Dead (attributable to causes other than this cancer dx)	12	Diseases of Heart	One primary only	September	No/Unknown
1855876	1990	Male	67	Asian or Pacific Islander	Married (including common law)	Sigmoid Colon	8140/3: Adenocarcinoma, NOS	C18.7-Sigmoid colon	Moderately differentiated; Grade II	10	Blank(s)	Blank(s)	T2	Blank(s)	Blank(s)	N0	Blank(s)	Blank(s)	Blank(s)	Blank(s)	Blank(s)	Blank(s)	Blank(s)	Blank(s)	Blank(s)	Blank(s)	15	0	Blank(s)	No radiation and/or cancer-directed surgery	None	Alive or dead of other cause	Dead (attributable to causes other than this cancer dx)	51	State DC not available or state DC available but no COD	One primary only	September	No/Unknown
1855897	1990	Female	69	Black	Widowed	Hepatic Flexure	8140/3: Adenocarcinoma, NOS	C18.3-Hepatic flexure of colon	Well differentiated; Grade I	20	Blank(s)	Blank(s)	T3	Blank(s)	Blank(s)	N0	Blank(s)	Blank(s)	Blank(s)	Blank(s)	Blank(s)	Blank(s)	Blank(s)	Blank(s)	Blank(s)	Blank(s)	98	0	Blank(s)	No radiation and/or cancer-directed surgery	None	Alive or dead of other cause	Dead (attributable to causes other than this cancer dx)	80	Diabetes Mellitus	One primary only	July	No/Unknown
1856034	1991	Female	62	White	Married (including common law)	Rectum	8481/3: Mucin-producing adenocarcinoma	C20.9-Rectum, NOS	Moderately differentiated; Grade II	30	Blank(s)	Blank(s)	T1	Blank(s)	Blank(s)	N2	Blank(s)	Blank(s)	Blank(s)	Blank(s)	Blank(s)	Blank(s)	Blank(s)	Blank(s)	Blank(s)	Blank(s)	11	6	Blank(s)	Radiation after surgery	Beam radiation	Dead (attributable to this cancer dx)	Alive or dead due to cancer	38	Rectum and Rectosigmoid Junction	One primary only	June	Yes
1856053	1991	Female	71	White	Unknown	Ascending Colon	8140/3: Adenocarcinoma, NOS	C18.2-Ascending colon	Poorly differentiated; Grade III	10	Blank(s)	Blank(s)	T2	Blank(s)	Blank(s)	N0	Blank(s)	Blank(s)	Blank(s)	Blank(s)	Blank(s)	Blank(s)	Blank(s)	Blank(s)	Blank(s)	Blank(s)	8	0	Blank(s)	No radiation and/or cancer-directed surgery	None	Alive or dead of other cause	Dead (attributable to causes other than this cancer dx)	110	Cerebrovascular Diseases	One primary only	November	No/Unknown
1856133	1989	Female	61	White	Married (including common law)	Ascending Colon	8140/3: Adenocarcinoma, NOS	C18.2-Ascending colon	Moderately differentiated; Grade II	20	Blank(s)	Blank(s)	T3	Blank(s)	Blank(s)	N0	Blank(s)	Blank(s)	Blank(s)	Blank(s)	Blank(s)	Blank(s)	Blank(s)	Blank(s)	Blank(s)	Blank(s)	9	0	Blank(s)	No radiation and/or cancer-directed surgery	None	Alive or dead of other cause	Dead (attributable to causes other than this cancer dx)	197	Diseases of Heart	One primary only	December	No/Unknown
1856139	1989	Female	56	White	Married (including common law)	Rectosigmoid Junction	8140/3: Adenocarcinoma, NOS	C19.9-Rectosigmoid junction	Moderately differentiated; Grade II	20	Blank(s)	Blank(s)	T3	Blank(s)	Blank(s)	N0	Blank(s)	Blank(s)	Blank(s)	Blank(s)	Blank(s)	Blank(s)	Blank(s)	Blank(s)	Blank(s)	Blank(s)	20	0	Blank(s)	Radiation after surgery	Beam radiation	Dead (attributable to this cancer dx)	Alive or dead due to cancer	62	Rectum and Rectosigmoid Junction	One primary only	April	No/Unknown
1856198	1989	Female	75	Black	Widowed	Ascending Colon	8140/3: Adenocarcinoma, NOS	C18.2-Ascending colon	Poorly differentiated; Grade III	20	Blank(s)	Blank(s)	T4	Blank(s)	Blank(s)	N0	Blank(s)	Blank(s)	Blank(s)	Blank(s)	Blank(s)	Blank(s)	Blank(s)	Blank(s)	Blank(s)	Blank(s)	24	0	Blank(s)	No radiation and/or cancer-directed surgery	None	Dead (attributable to this cancer dx)	Alive or dead due to cancer	57	Colon excluding Rectum	One primary only	February	No/Unknown
1856514	1990	Female	80	White	Single (never married)	Sigmoid Colon	8481/3: Mucin-producing adenocarcinoma	C18.7-Sigmoid colon	Moderately differentiated; Grade II	20	Blank(s)	Blank(s)	T3	Blank(s)	Blank(s)	N0	Blank(s)	Blank(s)	Blank(s)	Blank(s)	Blank(s)	Blank(s)	Blank(s)	Blank(s)	Blank(s)	Blank(s)	22	0	Blank(s)	No radiation and/or cancer-directed surgery	None	Alive or dead of other cause	Dead (attributable to causes other than this cancer dx)	64	Diseases of Heart	One primary only	August	No/Unknown
1856544	1990	Female	49	Black	Married (including common law)	Rectosigmoid Junction	8140/3: Adenocarcinoma, NOS	C19.9-Rectosigmoid junction	Moderately differentiated; Grade II	10	Blank(s)	Blank(s)	T2	Blank(s)	Blank(s)	N0	Blank(s)	Blank(s)	Blank(s)	Blank(s)	Blank(s)	Blank(s)	Blank(s)	Blank(s)	Blank(s)	Blank(s)	0	98	Blank(s)	No radiation and/or cancer-directed surgery	None	Dead (attributable to this cancer dx)	Alive or dead due to cancer	55	Colon excluding Rectum	One primary only	September	No/Unknown
1856603	1990	Female	77	White	Widowed	Rectosigmoid Junction	8140/3: Adenocarcinoma, NOS	C19.9-Rectosigmoid junction	Poorly differentiated; Grade III	20	Blank(s)	Blank(s)	T3	Blank(s)	Blank(s)	N0	Blank(s)	Blank(s)	Blank(s)	Blank(s)	Blank(s)	Blank(s)	Blank(s)	Blank(s)	Blank(s)	Blank(s)	11	0	Blank(s)	No radiation and/or cancer-directed surgery	None	Alive or dead of other cause	Dead (attributable to causes other than this cancer dx)	36	Chronic Obstructive Pulmonary Disease and Allied Cond	One primary only	January	No/Unknown
1856941	1990	Male	68	White	Single (never married)	Descending Colon	8140/3: Adenocarcinoma, NOS	C18.6-Descending colon	Poorly differentiated; Grade III	20	Blank(s)	Blank(s)	T3	Blank(s)	Blank(s)	N0	Blank(s)	Blank(s)	Blank(s)	Blank(s)	Blank(s)	Blank(s)	Blank(s)	Blank(s)	Blank(s)	Blank(s)	8	0	Blank(s)	No radiation and/or cancer-directed surgery	None	Dead (attributable to this cancer dx)	Alive or dead due to cancer	42	Colon excluding Rectum	One primary only	January	No/Unknown
1857036	1991	Female	73	Black	Divorced	Hepatic Flexure	8140/3: Adenocarcinoma, NOS	C18.3-Hepatic flexure of colon	Moderately differentiated; Grade II	30	Blank(s)	Blank(s)	T3	Blank(s)	Blank(s)	N1	Blank(s)	Blank(s)	Blank(s)	Blank(s)	Blank(s)	Blank(s)	Blank(s)	Blank(s)	Blank(s)	Blank(s)	4	1	Blank(s)	No radiation and/or cancer-directed surgery	None	Alive or dead of other cause	Dead (attributable to causes other than this cancer dx)	208	Alzheimers (ICD-9 and 10 only)	One primary only	January	Yes
1857169	1989	Female	74	White	Widowed	Cecum	8140/3: Adenocarcinoma, NOS	C18.0-Cecum	Moderately differentiated; Grade II	10	Blank(s)	Blank(s)	T2	Blank(s)	Blank(s)	N0	Blank(s)	Blank(s)	Blank(s)	Blank(s)	Blank(s)	Blank(s)	Blank(s)	Blank(s)	Blank(s)	Blank(s)	2	0	Blank(s)	No radiation and/or cancer-directed surgery	None	Alive or dead of other cause	Dead (attributable to causes other than this cancer dx)	145	Accidents and Adverse Effects	One primary only	April	No/Unknown
1857262	1989	Male	73	Black	Married (including common law)	Cecum	8480/3: Mucinous adenocarcinoma	C18.0-Cecum	Moderately differentiated; Grade II	20	Blank(s)	Blank(s)	T4	Blank(s)	Blank(s)	N0	Blank(s)	Blank(s)	Blank(s)	Blank(s)	Blank(s)	Blank(s)	Blank(s)	Blank(s)	Blank(s)	Blank(s)	11	0	Blank(s)	No radiation and/or cancer-directed surgery	None	Alive or dead of other cause	Dead (attributable to causes other than this cancer dx)	53	Aortic Aneurysm and Dissection	One primary only	June	No/Unknown
1857326	1988	Female	68	White	Widowed	Rectosigmoid Junction	8140/3: Adenocarcinoma, NOS	C19.9-Rectosigmoid junction	Moderately differentiated; Grade II	10	Blank(s)	Blank(s)	T1	Blank(s)	Blank(s)	N0	Blank(s)	Blank(s)	Blank(s)	Blank(s)	Blank(s)	Blank(s)	Blank(s)	Blank(s)	Blank(s)	Blank(s)	3	0	Blank(s)	No radiation and/or cancer-directed surgery	None	Alive or dead of other cause	Dead (attributable to causes other than this cancer dx)	166	Other Cause of Death	One primary only	November	No/Unknown
1857369	1991	Male	78	Asian or Pacific Islander	Married (including common law)	Ascending Colon	8140/3: Adenocarcinoma, NOS	C18.2-Ascending colon	Moderately differentiated; Grade II	20	Blank(s)	Blank(s)	T3	Blank(s)	Blank(s)	N0	Blank(s)	Blank(s)	Blank(s)	Blank(s)	Blank(s)	Blank(s)	Blank(s)	Blank(s)	Blank(s)	Blank(s)	3	0	Blank(s)	No radiation and/or cancer-directed surgery	None	Alive or dead of other cause	Dead (attributable to causes other than this cancer dx)	261	Alzheimers (ICD-9 and 10 only)	One primary only	November	No/Unknown
1857520	1990	Female	57	White	Divorced	Sigmoid Colon	8140/3: Adenocarcinoma, NOS	C18.7-Sigmoid colon	Well differentiated; Grade I	20	Blank(s)	Blank(s)	T3	Blank(s)	Blank(s)	N0	Blank(s)	Blank(s)	Blank(s)	Blank(s)	Blank(s)	Blank(s)	Blank(s)	Blank(s)	Blank(s)	Blank(s)	17	0	Blank(s)	No radiation and/or cancer-directed surgery	None	Alive or dead of other cause	Dead (attributable to causes other than this cancer dx)	207	Pneumonia and Influenza	One primary only	February	No/Unknown
1857550	1988	Male	54	White	Married (including common law)	Rectum	8140/3: Adenocarcinoma, NOS	C20.9-Rectum, NOS	Moderately differentiated; Grade II	20	Blank(s)	Blank(s)	T3	Blank(s)	Blank(s)	N0	Blank(s)	Blank(s)	Blank(s)	Blank(s)	Blank(s)	Blank(s)	Blank(s)	Blank(s)	Blank(s)	Blank(s)	10	0	Blank(s)	Radiation after surgery	Beam radiation	Dead (attributable to this cancer dx)	Alive or dead due to cancer	36	Rectum and Rectosigmoid Junction	One primary only	December	No/Unknown
1857603	1991	Male	66	White	Married (including common law)	Rectum	8140/3: Adenocarcinoma, NOS	C20.9-Rectum, NOS	Moderately differentiated; Grade II	30	Blank(s)	Blank(s)	T3	Blank(s)	Blank(s)	N1	Blank(s)	Blank(s)	Blank(s)	Blank(s)	Blank(s)	Blank(s)	Blank(s)	Blank(s)	Blank(s)	Blank(s)	16	3	Blank(s)	Radiation after surgery	Beam radiation	Alive or dead of other cause	Dead (attributable to causes other than this cancer dx)	82	Diseases of Heart	One primary only	October	Yes
1857851	1990	Female	60	White	Married (including common law)	Cecum	8140/3: Adenocarcinoma, NOS	C18.0-Cecum	Moderately differentiated; Grade II	10	Blank(s)	Blank(s)	T2	Blank(s)	Blank(s)	N0	Blank(s)	Blank(s)	Blank(s)	Blank(s)	Blank(s)	Blank(s)	Blank(s)	Blank(s)	Blank(s)	Blank(s)	8	0	Blank(s)	No radiation and/or cancer-directed surgery	None	Alive or dead of other cause	Alive or dead due to cancer	280	Alive	One primary only	August	No/Unknown
1857903	1990	Female	65	White	Single (never married)	Cecum	8140/3: Adenocarcinoma, NOS	C18.0-Cecum	Poorly differentiated; Grade III	30	Blank(s)	Blank(s)	T4	Blank(s)	Blank(s)	N3	Blank(s)	Blank(s)	Blank(s)	Blank(s)	Blank(s)	Blank(s)	Blank(s)	Blank(s)	Blank(s)	Blank(s)	0	98	Blank(s)	No radiation and/or cancer-directed surgery	None	Dead (attributable to this cancer dx)	Alive or dead due to cancer	11	Colon excluding Rectum	One primary only	August	Yes
1857936	1989	Female	64	White	Married (including common law)	Hepatic Flexure	8481/3: Mucin-producing adenocarcinoma	C18.3-Hepatic flexure of colon	Moderately differentiated; Grade II	20	Blank(s)	Blank(s)	T4	Blank(s)	Blank(s)	N0	Blank(s)	Blank(s)	Blank(s)	Blank(s)	Blank(s)	Blank(s)	Blank(s)	Blank(s)	Blank(s)	Blank(s)	8	0	Blank(s)	Radiation after surgery	Beam radiation	Dead (attributable to this cancer dx)	Alive or dead due to cancer	27	Miscellaneous Malignant Cancer	One primary only	April	Yes
1858202	1990	Male	79	White	Married (including common law)	Transverse Colon	8140/3: Adenocarcinoma, NOS	C18.4-Transverse colon	Poorly differentiated; Grade III	30	Blank(s)	Blank(s)	T3	Blank(s)	Blank(s)	N3	Blank(s)	Blank(s)	Blank(s)	Blank(s)	Blank(s)	Blank(s)	Blank(s)	Blank(s)	Blank(s)	Blank(s)	6	2	Blank(s)	No radiation and/or cancer-directed surgery	None	Dead (attributable to this cancer dx)	Alive or dead due to cancer	40	Colon excluding Rectum	One primary only	October	Yes
1858419	1990	Female	62	Asian or Pacific Islander	Married (including common law)	Rectosigmoid Junction	8140/3: Adenocarcinoma, NOS	C19.9-Rectosigmoid junction	Moderately differentiated; Grade II	20	Blank(s)	Blank(s)	T3	Blank(s)	Blank(s)	N0	Blank(s)	Blank(s)	Blank(s)	Blank(s)	Blank(s)	Blank(s)	Blank(s)	Blank(s)	Blank(s)	Blank(s)	14	0	Blank(s)	No radiation and/or cancer-directed surgery	None	Alive or dead of other cause	Dead (attributable to causes other than this cancer dx)	156	Septicemia	One primary only	January	No/Unknown
1858441	1991	Female	42	Asian or Pacific Islander	Married (including common law)	Ascending Colon	8481/3: Mucin-producing adenocarcinoma	C18.2-Ascending colon	Moderately differentiated; Grade II	10	Blank(s)	Blank(s)	T2	Blank(s)	Blank(s)	N0	Blank(s)	Blank(s)	Blank(s)	Blank(s)	Blank(s)	Blank(s)	Blank(s)	Blank(s)	Blank(s)	Blank(s)	8	0	Blank(s)	No radiation and/or cancer-directed surgery	None	Alive or dead of other cause	Alive or dead due to cancer	266	Alive	One primary only	October	No/Unknown
1858486	1991	Male	75	White	Married (including common law)	Rectum	8140/3: Adenocarcinoma, NOS	C20.9-Rectum, NOS	Moderately differentiated; Grade II	20	Blank(s)	Blank(s)	T3	Blank(s)	Blank(s)	N0	Blank(s)	Blank(s)	Blank(s)	Blank(s)	Blank(s)	Blank(s)	Blank(s)	Blank(s)	Blank(s)	Blank(s)	6	0	Blank(s)	Radiation after surgery	Beam radiation	Dead (attributable to this cancer dx)	Alive or dead due to cancer	22	Rectum and Rectosigmoid Junction	One primary only	February	Yes
1858537	1990	Female	59	White	Married (including common law)	Sigmoid Colon	8140/3: Adenocarcinoma, NOS	C18.7-Sigmoid colon	Moderately differentiated; Grade II	20	Blank(s)	Blank(s)	T3	Blank(s)	Blank(s)	N0	Blank(s)	Blank(s)	Blank(s)	Blank(s)	Blank(s)	Blank(s)	Blank(s)	Blank(s)	Blank(s)	Blank(s)	4	0	Blank(s)	No radiation and/or cancer-directed surgery	None	Dead (attributable to this cancer dx)	Alive or dead due to cancer	15	Colon excluding Rectum	One primary only	November	No/Unknown
1858707	1990	Male	64	Black	Married (including common law)	Rectosigmoid Junction	8480/3: Mucinous adenocarcinoma	C19.9-Rectosigmoid junction	Moderately differentiated; Grade II	30	Blank(s)	Blank(s)	T3	Blank(s)	Blank(s)	N1	Blank(s)	Blank(s)	Blank(s)	Blank(s)	Blank(s)	Blank(s)	Blank(s)	Blank(s)	Blank(s)	Blank(s)	12	3	Blank(s)	No radiation and/or cancer-directed surgery	None	Dead (attributable to this cancer dx)	Alive or dead due to cancer	21	Colon excluding Rectum	One primary only	August	Yes
1858762	1988	Female	75	Black	Divorced	Rectosigmoid Junction	8140/3: Adenocarcinoma, NOS	C19.9-Rectosigmoid junction	Moderately differentiated; Grade II	20	Blank(s)	Blank(s)	T3	Blank(s)	Blank(s)	N0	Blank(s)	Blank(s)	Blank(s)	Blank(s)	Blank(s)	Blank(s)	Blank(s)	Blank(s)	Blank(s)	Blank(s)	16	0	Blank(s)	No radiation and/or cancer-directed surgery	None	Alive or dead of other cause	Dead (attributable to causes other than this cancer dx)	168	Other Cause of Death	One primary only	October	No/Unknown
1858782	1990	Female	46	Black	Single (never married)	Rectum	8140/3: Adenocarcinoma, NOS	C20.9-Rectum, NOS	Moderately differentiated; Grade II	20	Blank(s)	Blank(s)	T3	Blank(s)	Blank(s)	N0	Blank(s)	Blank(s)	Blank(s)	Blank(s)	Blank(s)	Blank(s)	Blank(s)	Blank(s)	Blank(s)	Blank(s)	18	0	Blank(s)	No radiation and/or cancer-directed surgery	None	Alive or dead of other cause	Dead (attributable to causes other than this cancer dx)	178	Other Infectious and Parasitic Diseases including HIV	One primary only	November	No/Unknown
1858803	1991	Female	55	Asian or Pacific Islander	Married (including common law)	Sigmoid Colon	8140/3: Adenocarcinoma, NOS	C18.7-Sigmoid colon	Moderately differentiated; Grade II	30	Blank(s)	Blank(s)	T3	Blank(s)	Blank(s)	N1	Blank(s)	Blank(s)	Blank(s)	Blank(s)	Blank(s)	Blank(s)	Blank(s)	Blank(s)	Blank(s)	Blank(s)	8	1	Blank(s)	No radiation and/or cancer-directed surgery	None	Alive or dead of other cause	Alive or dead due to cancer	272	Alive	One primary only	April	No/Unknown
1858805	1988	Male	34	Black	Unknown	Rectosigmoid Junction	8140/3: Adenocarcinoma, NOS	C19.9-Rectosigmoid junction	Well differentiated; Grade I	20	Blank(s)	Blank(s)	T3	Blank(s)	Blank(s)	N0	Blank(s)	Blank(s)	Blank(s)	Blank(s)	Blank(s)	Blank(s)	Blank(s)	Blank(s)	Blank(s)	Blank(s)	98	0	Blank(s)	No radiation and/or cancer-directed surgery	None	Dead (attributable to this cancer dx)	Alive or dead due to cancer	1	Colon excluding Rectum	One primary only	December	No/Unknown
1858948	1990	Female	55	White	Married (including common law)	Descending Colon	8140/3: Adenocarcinoma, NOS	C18.6-Descending colon	Moderately differentiated; Grade II	20	Blank(s)	Blank(s)	T3	Blank(s)	Blank(s)	N0	Blank(s)	Blank(s)	Blank(s)	Blank(s)	Blank(s)	Blank(s)	Blank(s)	Blank(s)	Blank(s)	Blank(s)	9	0	Blank(s)	No radiation and/or cancer-directed surgery	None	Alive or dead of other cause	Dead (attributable to causes other than this cancer dx)	257	State DC not available or state DC available but no COD	One primary only	October	Yes
1858992	1988	Male	53	Black	Single (never married)	Descending Colon	8140/3: Adenocarcinoma, NOS	C18.6-Descending colon	Moderately differentiated; Grade II	20	Blank(s)	Blank(s)	T3	Blank(s)	Blank(s)	N0	Blank(s)	Blank(s)	Blank(s)	Blank(s)	Blank(s)	Blank(s)	Blank(s)	Blank(s)	Blank(s)	Blank(s)	0	98	Blank(s)	No radiation and/or cancer-directed surgery	None	Alive or dead of other cause	Dead (attributable to causes other than this cancer dx)	196	Diseases of Heart	One primary only	October	No/Unknown
1859062	1990	Female	76	White	Widowed	Rectosigmoid Junction	8140/3: Adenocarcinoma, NOS	C19.9-Rectosigmoid junction	Moderately differentiated; Grade II	20	Blank(s)	Blank(s)	T3	Blank(s)	Blank(s)	N0	Blank(s)	Blank(s)	Blank(s)	Blank(s)	Blank(s)	Blank(s)	Blank(s)	Blank(s)	Blank(s)	Blank(s)	9	0	Blank(s)	No radiation and/or cancer-directed surgery	Refused	Alive or dead of other cause	Dead (attributable to causes other than this cancer dx)	83	Diseases of Heart	One primary only	August	Yes
1859081	1990	Male	63	Asian or Pacific Islander	Married (including common law)	Splenic Flexure	8140/3: Adenocarcinoma, NOS	C18.5-Splenic flexure of colon	Moderately differentiated; Grade II	10	Blank(s)	Blank(s)	T1	Blank(s)	Blank(s)	N0	Blank(s)	Blank(s)	Blank(s)	Blank(s)	Blank(s)	Blank(s)	Blank(s)	Blank(s)	Blank(s)	Blank(s)	3	0	Blank(s)	No radiation and/or cancer-directed surgery	None	Alive or dead of other cause	Alive or dead due to cancer	283	Alive	One primary only	May	No/Unknown
1859153	1990	Male	68	White	Married (including common law)	Rectum	8481/3: Mucin-producing adenocarcinoma	C20.9-Rectum, NOS	Moderately differentiated; Grade II	20	Blank(s)	Blank(s)	T3	Blank(s)	Blank(s)	N0	Blank(s)	Blank(s)	Blank(s)	Blank(s)	Blank(s)	Blank(s)	Blank(s)	Blank(s)	Blank(s)	Blank(s)	6	0	Blank(s)	Radiation after surgery	Beam radiation	Dead (attributable to this cancer dx)	Alive or dead due to cancer	121	Rectum and Rectosigmoid Junction	One primary only	January	No/Unknown
1859157	1988	Female	61	Black	Single (never married)	Ascending Colon	8140/3: Adenocarcinoma, NOS	C18.2-Ascending colon	Moderately differentiated; Grade II	30	Blank(s)	Blank(s)	T3	Blank(s)	Blank(s)	N1	Blank(s)	Blank(s)	Blank(s)	Blank(s)	Blank(s)	Blank(s)	Blank(s)	Blank(s)	Blank(s)	Blank(s)	44	1	Blank(s)	No radiation and/or cancer-directed surgery	None	Alive or dead of other cause	Alive or dead due to cancer	308	Alive	One primary only	April	No/Unknown
1859212	1991	Male	67	White	Married (including common law)	Rectosigmoid Junction	8140/3: Adenocarcinoma, NOS	C19.9-Rectosigmoid junction	Moderately differentiated; Grade II	30	Blank(s)	Blank(s)	T3	Blank(s)	Blank(s)	N2	Blank(s)	Blank(s)	Blank(s)	Blank(s)	Blank(s)	Blank(s)	Blank(s)	Blank(s)	Blank(s)	Blank(s)	8	7	Blank(s)	Radiation after surgery	Beam radiation	Dead (attributable to this cancer dx)	Alive or dead due to cancer	13	Colon excluding Rectum	One primary only	June	Yes
1859324	1988	Female	53	Asian or Pacific Islander	Unknown	Appendix	8140/3: Adenocarcinoma, NOS	C18.1-Appendix	Moderately differentiated; Grade II	20	Blank(s)	Blank(s)	T4	Blank(s)	Blank(s)	N0	Blank(s)	Blank(s)	Blank(s)	Blank(s)	Blank(s)	Blank(s)	Blank(s)	Blank(s)	Blank(s)	Blank(s)	0	98	Blank(s)	No radiation and/or cancer-directed surgery	None	Dead (attributable to this cancer dx)	Alive or dead due to cancer	93	Colon excluding Rectum	One primary only	July	No/Unknown
1859383	1989	Female	62	White	Separated	Sigmoid Colon	8140/3: Adenocarcinoma, NOS	C18.7-Sigmoid colon	Moderately differentiated; Grade II	30	Blank(s)	Blank(s)	T3	Blank(s)	Blank(s)	N1	Blank(s)	Blank(s)	Blank(s)	Blank(s)	Blank(s)	Blank(s)	Blank(s)	Blank(s)	Blank(s)	Blank(s)	22	3	Blank(s)	No radiation and/or cancer-directed surgery	None	Alive or dead of other cause	Dead (attributable to causes other than this cancer dx)	149	Diabetes Mellitus	One primary only	December	No/Unknown
1859513	1989	Female	79	White	Widowed	Ascending Colon	8140/3: Adenocarcinoma, NOS	C18.2-Ascending colon	Moderately differentiated; Grade II	20	Blank(s)	Blank(s)	T3	Blank(s)	Blank(s)	N0	Blank(s)	Blank(s)	Blank(s)	Blank(s)	Blank(s)	Blank(s)	Blank(s)	Blank(s)	Blank(s)	Blank(s)	30	0	Blank(s)	No radiation and/or cancer-directed surgery	None	Alive or dead of other cause	Dead (attributable to causes other than this cancer dx)	29	Other Cause of Death	One primary only	November	No/Unknown
1859521	1988	Male	57	Black	Single (never married)	Rectosigmoid Junction	8140/3: Adenocarcinoma, NOS	C19.9-Rectosigmoid junction	Poorly differentiated; Grade III	20	Blank(s)	Blank(s)	T3	Blank(s)	Blank(s)	N0	Blank(s)	Blank(s)	Blank(s)	Blank(s)	Blank(s)	Blank(s)	Blank(s)	Blank(s)	Blank(s)	Blank(s)	15	0	Blank(s)	No radiation and/or cancer-directed surgery	Recommended, unknown if administered	Alive or dead of other cause	Alive or dead due to cancer	301	Alive	One primary only	November	No/Unknown
1859685	1988	Female	69	White	Married (including common law)	Sigmoid Colon	8140/3: Adenocarcinoma, NOS	C18.7-Sigmoid colon	Moderately differentiated; Grade II	20	Blank(s)	Blank(s)	T3	Blank(s)	Blank(s)	N0	Blank(s)	Blank(s)	Blank(s)	Blank(s)	Blank(s)	Blank(s)	Blank(s)	Blank(s)	Blank(s)	Blank(s)	6	0	Blank(s)	No radiation and/or cancer-directed surgery	None	Alive or dead of other cause	Dead (attributable to causes other than this cancer dx)	209	Alzheimers (ICD-9 and 10 only)	One primary only	June	No/Unknown
1859734	1990	Male	60	White	Married (including common law)	Rectosigmoid Junction	8140/3: Adenocarcinoma, NOS	C19.9-Rectosigmoid junction	Moderately differentiated; Grade II	20	Blank(s)	Blank(s)	T3	Blank(s)	Blank(s)	N0	Blank(s)	Blank(s)	Blank(s)	Blank(s)	Blank(s)	Blank(s)	Blank(s)	Blank(s)	Blank(s)	Blank(s)	13	0	Blank(s)	Radiation after surgery	Beam radiation	Dead (attributable to this cancer dx)	Alive or dead due to cancer	42	Colon excluding Rectum	One primary only	October	Yes
1859938	1988	Female	62	White	Single (never married)	Descending Colon	8140/3: Adenocarcinoma, NOS	C18.6-Descending colon	Moderately differentiated; Grade II	20	Blank(s)	Blank(s)	T3	Blank(s)	Blank(s)	N0	Blank(s)	Blank(s)	Blank(s)	Blank(s)	Blank(s)	Blank(s)	Blank(s)	Blank(s)	Blank(s)	Blank(s)	24	0	Blank(s)	No radiation and/or cancer-directed surgery	None	Alive or dead of other cause	Dead (attributable to causes other than this cancer dx)	281	Alzheimers (ICD-9 and 10 only)	One primary only	July	Yes
1860044	1990	Male	35	Asian or Pacific Islander	Married (including common law)	Rectosigmoid Junction	8140/3: Adenocarcinoma, NOS	C19.9-Rectosigmoid junction	Moderately differentiated; Grade II	10	Blank(s)	Blank(s)	T2	Blank(s)	Blank(s)	N0	Blank(s)	Blank(s)	Blank(s)	Blank(s)	Blank(s)	Blank(s)	Blank(s)	Blank(s)	Blank(s)	Blank(s)	7	0	Blank(s)	No radiation and/or cancer-directed surgery	None	Dead (attributable to this cancer dx)	Alive or dead due to cancer	55	Rectum and Rectosigmoid Junction	One primary only	January	No/Unknown
1860106	1989	Male	58	White	Separated	Rectum	8140/3: Adenocarcinoma, NOS	C20.9-Rectum, NOS	Well differentiated; Grade I	20	Blank(s)	Blank(s)	T3	Blank(s)	Blank(s)	N0	Blank(s)	Blank(s)	Blank(s)	Blank(s)	Blank(s)	Blank(s)	Blank(s)	Blank(s)	Blank(s)	Blank(s)	0	98	Blank(s)	Radiation after surgery	Beam radiation	Alive or dead of other cause	Alive or dead due to cancer	288	Alive	One primary only	December	Yes
1860121	1988	Female	69	White	Married (including common law)	Transverse Colon	8480/3: Mucinous adenocarcinoma	C18.4-Transverse colon	Moderately differentiated; Grade II	20	Blank(s)	Blank(s)	T3	Blank(s)	Blank(s)	N0	Blank(s)	Blank(s)	Blank(s)	Blank(s)	Blank(s)	Blank(s)	Blank(s)	Blank(s)	Blank(s)	Blank(s)	9	0	Blank(s)	No radiation and/or cancer-directed surgery	None	Alive or dead of other cause	Dead (attributable to causes other than this cancer dx)	257	Diseases of Heart	One primary only	March	No/Unknown
1860175	1990	Female	68	White	Single (never married)	Sigmoid Colon	8140/3: Adenocarcinoma, NOS	C18.7-Sigmoid colon	Moderately differentiated; Grade II	30	Blank(s)	Blank(s)	T3	Blank(s)	Blank(s)	N3	Blank(s)	Blank(s)	Blank(s)	Blank(s)	Blank(s)	Blank(s)	Blank(s)	Blank(s)	Blank(s)	Blank(s)	5	4	Blank(s)	No radiation and/or cancer-directed surgery	None	Dead (attributable to this cancer dx)	Alive or dead due to cancer	12	Colon excluding Rectum	One primary only	September	No/Unknown
1860195	1989	Male	42	Asian or Pacific Islander	Married (including common law)	Rectum	8140/3: Adenocarcinoma, NOS	C20.9-Rectum, NOS	Poorly differentiated; Grade III	20	Blank(s)	Blank(s)	T3	Blank(s)	Blank(s)	N0	Blank(s)	Blank(s)	Blank(s)	Blank(s)	Blank(s)	Blank(s)	Blank(s)	Blank(s)	Blank(s)	Blank(s)	4	0	Blank(s)	No radiation and/or cancer-directed surgery	None	Alive or dead of other cause	Alive or dead due to cancer	295	Alive	One primary only	May	No/Unknown
1860226	1991	Female	75	White	Married (including common law)	Rectum	8140/3: Adenocarcinoma, NOS	C20.9-Rectum, NOS	Moderately differentiated; Grade II	10	Blank(s)	Blank(s)	T2	Blank(s)	Blank(s)	N0	Blank(s)	Blank(s)	Blank(s)	Blank(s)	Blank(s)	Blank(s)	Blank(s)	Blank(s)	Blank(s)	Blank(s)	3	0	Blank(s)	No radiation and/or cancer-directed surgery	None	Alive or dead of other cause	Alive or dead due to cancer	264	Alive	One primary only	December	No/Unknown
1860341	1990	Male	34	White	Single (never married)	Ascending Colon	8140/3: Adenocarcinoma, NOS	C18.2-Ascending colon	Moderately differentiated; Grade II	20	Blank(s)	Blank(s)	T3	Blank(s)	Blank(s)	N0	Blank(s)	Blank(s)	Blank(s)	Blank(s)	Blank(s)	Blank(s)	Blank(s)	Blank(s)	Blank(s)	Blank(s)	32	0	Blank(s)	No radiation and/or cancer-directed surgery	None	Alive or dead of other cause	Alive or dead due to cancer	286	Alive	One primary only	February	No/Unknown
1860356	1988	Female	77	White	Widowed	Rectum	8140/3: Adenocarcinoma, NOS	C20.9-Rectum, NOS	Poorly differentiated; Grade III	10	Blank(s)	Blank(s)	T2	Blank(s)	Blank(s)	N0	Blank(s)	Blank(s)	Blank(s)	Blank(s)	Blank(s)	Blank(s)	Blank(s)	Blank(s)	Blank(s)	Blank(s)	9	0	Blank(s)	Radiation prior to surgery	Beam radiation	Alive or dead of other cause	Dead (attributable to causes other than this cancer dx)	264	Other Infectious and Parasitic Diseases including HIV	One primary only	August	No/Unknown
1860443	1990	Female	76	White	Married (including common law)	Rectosigmoid Junction	8140/3: Adenocarcinoma, NOS	C19.9-Rectosigmoid junction	Moderately differentiated; Grade II	20	Blank(s)	Blank(s)	T3	Blank(s)	Blank(s)	N0	Blank(s)	Blank(s)	Blank(s)	Blank(s)	Blank(s)	Blank(s)	Blank(s)	Blank(s)	Blank(s)	Blank(s)	0	98	Blank(s)	No radiation and/or cancer-directed surgery	None	Dead (attributable to this cancer dx)	Alive or dead due to cancer	23	Colon excluding Rectum	One primary only	October	No/Unknown
1860595	1988	Female	67	White	Divorced	Sigmoid Colon	8140/3: Adenocarcinoma, NOS	C18.7-Sigmoid colon	Moderately differentiated; Grade II	10	Blank(s)	Blank(s)	T2	Blank(s)	Blank(s)	N0	Blank(s)	Blank(s)	Blank(s)	Blank(s)	Blank(s)	Blank(s)	Blank(s)	Blank(s)	Blank(s)	Blank(s)	13	0	Blank(s)	No radiation and/or cancer-directed surgery	None	Alive or dead of other cause	Dead (attributable to causes other than this cancer dx)	53	Other Cause of Death	One primary only	September	No/Unknown
1860623	1990	Female	80	White	Widowed	Cecum	8140/3: Adenocarcinoma, NOS	C18.0-Cecum	Moderately differentiated; Grade II	20	Blank(s)	Blank(s)	T3	Blank(s)	Blank(s)	N0	Blank(s)	Blank(s)	Blank(s)	Blank(s)	Blank(s)	Blank(s)	Blank(s)	Blank(s)	Blank(s)	Blank(s)	9	0	Blank(s)	No radiation and/or cancer-directed surgery	None	Alive or dead of other cause	Dead (attributable to causes other than this cancer dx)	43	Nephritis, Nephrotic Syndrome and Nephrosis	One primary only	February	No/Unknown
1860972	1990	Female	57	White	Widowed	Rectum	8140/3: Adenocarcinoma, NOS	C20.9-Rectum, NOS	Moderately differentiated; Grade II	10	Blank(s)	Blank(s)	T2	Blank(s)	Blank(s)	N0	Blank(s)	Blank(s)	Blank(s)	Blank(s)	Blank(s)	Blank(s)	Blank(s)	Blank(s)	Blank(s)	Blank(s)	7	0	Blank(s)	No radiation and/or cancer-directed surgery	None	Dead (attributable to this cancer dx)	Alive or dead due to cancer	51	Rectum and Rectosigmoid Junction	One primary only	February	No/Unknown
1861081	1991	Male	59	Asian or Pacific Islander	Separated	Descending Colon	8140/3: Adenocarcinoma, NOS	C18.6-Descending colon	Moderately differentiated; Grade II	10	Blank(s)	Blank(s)	T1	Blank(s)	Blank(s)	N0	Blank(s)	Blank(s)	Blank(s)	Blank(s)	Blank(s)	Blank(s)	Blank(s)	Blank(s)	Blank(s)	Blank(s)	2	0	Blank(s)	No radiation and/or cancer-directed surgery	None	Alive or dead of other cause	Alive or dead due to cancer	270	Alive	One primary only	June	No/Unknown
1861109	1991	Female	62	Black	Divorced	Sigmoid Colon	8481/3: Mucin-producing adenocarcinoma	C18.7-Sigmoid colon	Moderately differentiated; Grade II	20	Blank(s)	Blank(s)	T3	Blank(s)	Blank(s)	N0	Blank(s)	Blank(s)	Blank(s)	Blank(s)	Blank(s)	Blank(s)	Blank(s)	Blank(s)	Blank(s)	Blank(s)	13	0	Blank(s)	No radiation and/or cancer-directed surgery	None	Alive or dead of other cause	Dead (attributable to causes other than this cancer dx)	217	Chronic Obstructive Pulmonary Disease and Allied Cond	One primary only	May	No/Unknown
1861154	1989	Female	80	White	Single (never married)	Sigmoid Colon	8140/3: Adenocarcinoma, NOS	C18.7-Sigmoid colon	Poorly differentiated; Grade III	30	Blank(s)	Blank(s)	T4	Blank(s)	Blank(s)	N2	Blank(s)	Blank(s)	Blank(s)	Blank(s)	Blank(s)	Blank(s)	Blank(s)	Blank(s)	Blank(s)	Blank(s)	19	11	Blank(s)	No radiation and/or cancer-directed surgery	None	Dead (attributable to this cancer dx)	Alive or dead due to cancer	5	Colon excluding Rectum	One primary only	June	No/Unknown
1861190	1989	Male	78	White	Widowed	Rectum	8140/3: Adenocarcinoma, NOS	C20.9-Rectum, NOS	Moderately differentiated; Grade II	20	Blank(s)	Blank(s)	T3	Blank(s)	Blank(s)	N0	Blank(s)	Blank(s)	Blank(s)	Blank(s)	Blank(s)	Blank(s)	Blank(s)	Blank(s)	Blank(s)	Blank(s)	8	0	Blank(s)	No radiation and/or cancer-directed surgery	None	Alive or dead of other cause	Dead (attributable to causes other than this cancer dx)	32	Diseases of Heart	One primary only	November	No/Unknown
1861220	1989	Male	69	White	Married (including common law)	Rectum	8140/3: Adenocarcinoma, NOS	C20.9-Rectum, NOS	Moderately differentiated; Grade II	20	Blank(s)	Blank(s)	T3	Blank(s)	Blank(s)	N0	Blank(s)	Blank(s)	Blank(s)	Blank(s)	Blank(s)	Blank(s)	Blank(s)	Blank(s)	Blank(s)	Blank(s)	28	0	Blank(s)	Radiation after surgery	Beam radiation	Dead (attributable to this cancer dx)	Alive or dead due to cancer	144	Miscellaneous Malignant Cancer	One primary only	August	No/Unknown
1861229	1991	Male	42	White	Married (including common law)	Cecum	8140/3: Adenocarcinoma, NOS	C18.0-Cecum	Moderately differentiated; Grade II	20	Blank(s)	Blank(s)	T3	Blank(s)	Blank(s)	N0	Blank(s)	Blank(s)	Blank(s)	Blank(s)	Blank(s)	Blank(s)	Blank(s)	Blank(s)	Blank(s)	Blank(s)	17	0	Blank(s)	No radiation and/or cancer-directed surgery	None	Alive or dead of other cause	Alive or dead due to cancer	270	Alive	One primary only	June	No/Unknown
1861440	1990	Female	74	White	Single (never married)	Ascending Colon	8140/3: Adenocarcinoma, NOS	C18.2-Ascending colon	Moderately differentiated; Grade II	20	Blank(s)	Blank(s)	T3	Blank(s)	Blank(s)	N0	Blank(s)	Blank(s)	Blank(s)	Blank(s)	Blank(s)	Blank(s)	Blank(s)	Blank(s)	Blank(s)	Blank(s)	47	0	Blank(s)	No radiation and/or cancer-directed surgery	None	Alive or dead of other cause	Dead (attributable to causes other than this cancer dx)	117	Diseases of Heart	One primary only	March	No/Unknown
1861481	1990	Female	77	Black	Widowed	Sigmoid Colon	8140/3: Adenocarcinoma, NOS	C18.7-Sigmoid colon	Moderately differentiated; Grade II	20	Blank(s)	Blank(s)	T3	Blank(s)	Blank(s)	N0	Blank(s)	Blank(s)	Blank(s)	Blank(s)	Blank(s)	Blank(s)	Blank(s)	Blank(s)	Blank(s)	Blank(s)	5	0	Blank(s)	No radiation and/or cancer-directed surgery	None	Alive or dead of other cause	Dead (attributable to causes other than this cancer dx)	82	Pneumonia and Influenza	One primary only	March	No/Unknown
1861490	1988	Female	73	White	Single (never married)	Rectum	8140/3: Adenocarcinoma, NOS	C20.9-Rectum, NOS	Poorly differentiated; Grade III	10	Blank(s)	Blank(s)	T2	Blank(s)	Blank(s)	N0	Blank(s)	Blank(s)	Blank(s)	Blank(s)	Blank(s)	Blank(s)	Blank(s)	Blank(s)	Blank(s)	Blank(s)	7	0	Blank(s)	No radiation and/or cancer-directed surgery	None	Alive or dead of other cause	Dead (attributable to causes other than this cancer dx)	185	Cerebrovascular Diseases	One primary only	May	No/Unknown
1861521	1989	Male	63	White	Married (including common law)	Descending Colon	8140/3: Adenocarcinoma, NOS	C18.6-Descending colon	Moderately differentiated; Grade II	20	Blank(s)	Blank(s)	T3	Blank(s)	Blank(s)	N0	Blank(s)	Blank(s)	Blank(s)	Blank(s)	Blank(s)	Blank(s)	Blank(s)	Blank(s)	Blank(s)	Blank(s)	9	0	Blank(s)	No radiation and/or cancer-directed surgery	None	Alive or dead of other cause	Alive or dead due to cancer	299	Alive	One primary only	January	No/Unknown
1861579	1988	Male	75	White	Married (including common law)	Splenic Flexure	8140/3: Adenocarcinoma, NOS	C18.5-Splenic flexure of colon	Moderately differentiated; Grade II	20	Blank(s)	Blank(s)	T3	Blank(s)	Blank(s)	N0	Blank(s)	Blank(s)	Blank(s)	Blank(s)	Blank(s)	Blank(s)	Blank(s)	Blank(s)	Blank(s)	Blank(s)	98	0	Blank(s)	No radiation and/or cancer-directed surgery	None	Alive or dead of other cause	Dead (attributable to causes other than this cancer dx)	93	Other Cause of Death	One primary only	December	No/Unknown
1861596	1988	Female	62	White	Single (never married)	Ascending Colon	8140/3: Adenocarcinoma, NOS	C18.2-Ascending colon	Moderately differentiated; Grade II	20	Blank(s)	Blank(s)	T4	Blank(s)	Blank(s)	N0	Blank(s)	Blank(s)	Blank(s)	Blank(s)	Blank(s)	Blank(s)	Blank(s)	Blank(s)	Blank(s)	Blank(s)	17	0	Blank(s)	No radiation and/or cancer-directed surgery	None	Alive or dead of other cause	Alive or dead due to cancer	305	Alive	One primary only	July	Yes
1861602	1990	Female	63	Asian or Pacific Islander	Married (including common law)	Rectum	8140/3: Adenocarcinoma, NOS	C20.9-Rectum, NOS	Moderately differentiated; Grade II	10	Blank(s)	Blank(s)	T2	Blank(s)	Blank(s)	N0	Blank(s)	Blank(s)	Blank(s)	Blank(s)	Blank(s)	Blank(s)	Blank(s)	Blank(s)	Blank(s)	Blank(s)	3	0	Blank(s)	No radiation and/or cancer-directed surgery	None	Alive or dead of other cause	Alive or dead due to cancer	287	Alive	One primary only	January	No/Unknown
1861639	1990	Male	66	White	Married (including common law)	Descending Colon	8140/3: Adenocarcinoma, NOS	C18.6-Descending colon	Moderately differentiated; Grade II	20	Blank(s)	Blank(s)	T3	Blank(s)	Blank(s)	N0	Blank(s)	Blank(s)	Blank(s)	Blank(s)	Blank(s)	Blank(s)	Blank(s)	Blank(s)	Blank(s)	Blank(s)	15	0	Blank(s)	No radiation and/or cancer-directed surgery	None	Alive or dead of other cause	Dead (attributable to causes other than this cancer dx)	275	Other Cause of Death	One primary only	March	No/Unknown
1861685	1989	Male	74	White	Married (including common law)	Sigmoid Colon	8140/3: Adenocarcinoma, NOS	C18.7-Sigmoid colon	Moderately differentiated; Grade II	20	Blank(s)	Blank(s)	T3	Blank(s)	Blank(s)	N0	Blank(s)	Blank(s)	Blank(s)	Blank(s)	Blank(s)	Blank(s)	Blank(s)	Blank(s)	Blank(s)	Blank(s)	11	0	Blank(s)	No radiation and/or cancer-directed surgery	None	Dead (attributable to this cancer dx)	Alive or dead due to cancer	23	Colon excluding Rectum	One primary only	October	No/Unknown
1861686	1988	Female	77	White	Single (never married)	Descending Colon	8140/3: Adenocarcinoma, NOS	C18.6-Descending colon	Poorly differentiated; Grade III	20	Blank(s)	Blank(s)	T4	Blank(s)	Blank(s)	N0	Blank(s)	Blank(s)	Blank(s)	Blank(s)	Blank(s)	Blank(s)	Blank(s)	Blank(s)	Blank(s)	Blank(s)	0	98	Blank(s)	No radiation and/or cancer-directed surgery	None	Alive or dead of other cause	Dead (attributable to causes other than this cancer dx)	96	Diseases of Heart	One primary only	December	No/Unknown
1861880	1989	Female	74	Black	Married (including common law)	Hepatic Flexure	8481/3: Mucin-producing adenocarcinoma	C18.3-Hepatic flexure of colon	Moderately differentiated; Grade II	20	Blank(s)	Blank(s)	T3	Blank(s)	Blank(s)	N0	Blank(s)	Blank(s)	Blank(s)	Blank(s)	Blank(s)	Blank(s)	Blank(s)	Blank(s)	Blank(s)	Blank(s)	21	0	Blank(s)	No radiation and/or cancer-directed surgery	None	Alive or dead of other cause	Dead (attributable to causes other than this cancer dx)	225	Cerebrovascular Diseases	One primary only	June	No/Unknown
1861942	1990	Male	71	White	Married (including common law)	Sigmoid Colon	8140/3: Adenocarcinoma, NOS	C18.7-Sigmoid colon	Moderately differentiated; Grade II	20	Blank(s)	Blank(s)	T3	Blank(s)	Blank(s)	N0	Blank(s)	Blank(s)	Blank(s)	Blank(s)	Blank(s)	Blank(s)	Blank(s)	Blank(s)	Blank(s)	Blank(s)	5	0	Blank(s)	No radiation and/or cancer-directed surgery	None	Alive or dead of other cause	Dead (attributable to causes other than this cancer dx)	90	Cerebrovascular Diseases	One primary only	August	No/Unknown
1861968	1991	Female	65	White	Married (including common law)	Rectum	8140/3: Adenocarcinoma, NOS	C20.9-Rectum, NOS	Well differentiated; Grade I	10	Blank(s)	Blank(s)	T2	Blank(s)	Blank(s)	N0	Blank(s)	Blank(s)	Blank(s)	Blank(s)	Blank(s)	Blank(s)	Blank(s)	Blank(s)	Blank(s)	Blank(s)	6	0	Blank(s)	No radiation and/or cancer-directed surgery	None	Alive or dead of other cause	Alive or dead due to cancer	272	Alive	One primary only	April	No/Unknown
1862015	1990	Female	57	White	Single (never married)	Appendix	8140/3: Adenocarcinoma, NOS	C18.1-Appendix	Moderately differentiated; Grade II	20	Blank(s)	Blank(s)	T3	Blank(s)	Blank(s)	N0	Blank(s)	Blank(s)	Blank(s)	Blank(s)	Blank(s)	Blank(s)	Blank(s)	Blank(s)	Blank(s)	Blank(s)	5	0	Blank(s)	No radiation and/or cancer-directed surgery	None	Alive or dead of other cause	Alive or dead due to cancer	279	Alive	One primary only	September	No/Unknown
1862036	1989	Female	63	Asian or Pacific Islander	Divorced	Rectosigmoid Junction	8140/3: Adenocarcinoma, NOS	C19.9-Rectosigmoid junction	Moderately differentiated; Grade II	20	Blank(s)	Blank(s)	T3	Blank(s)	Blank(s)	N0	Blank(s)	Blank(s)	Blank(s)	Blank(s)	Blank(s)	Blank(s)	Blank(s)	Blank(s)	Blank(s)	Blank(s)	98	0	Blank(s)	No radiation and/or cancer-directed surgery	None	Alive or dead of other cause	Alive or dead due to cancer	298	Alive	One primary only	February	No/Unknown
1862050	1988	Female	74	White	Widowed	Cecum	8140/3: Adenocarcinoma, NOS	C18.0-Cecum	Moderately differentiated; Grade II	20	Blank(s)	Blank(s)	T3	Blank(s)	Blank(s)	N0	Blank(s)	Blank(s)	Blank(s)	Blank(s)	Blank(s)	Blank(s)	Blank(s)	Blank(s)	Blank(s)	Blank(s)	11	0	Blank(s)	No radiation and/or cancer-directed surgery	None	Alive or dead of other cause	Dead (attributable to causes other than this cancer dx)	294	Other Cause of Death	One primary only	July	No/Unknown
1862144	1991	Male	42	Asian or Pacific Islander	Single (never married)	Ascending Colon	8140/3: Adenocarcinoma, NOS	C18.2-Ascending colon	Moderately differentiated; Grade II	20	Blank(s)	Blank(s)	T4	Blank(s)	Blank(s)	N0	Blank(s)	Blank(s)	Blank(s)	Blank(s)	Blank(s)	Blank(s)	Blank(s)	Blank(s)	Blank(s)	Blank(s)	14	0	Blank(s)	No radiation and/or cancer-directed surgery	None	Alive or dead of other cause	Dead (attributable to causes other than this cancer dx)	206	Diabetes Mellitus	One primary only	June	Yes
1862274	1988	Male	79	White	Married (including common law)	Sigmoid Colon	8140/3: Adenocarcinoma, NOS	C18.7-Sigmoid colon	Moderately differentiated; Grade II	20	Blank(s)	Blank(s)	T4	Blank(s)	Blank(s)	N0	Blank(s)	Blank(s)	Blank(s)	Blank(s)	Blank(s)	Blank(s)	Blank(s)	Blank(s)	Blank(s)	Blank(s)	15	0	Blank(s)	No radiation and/or cancer-directed surgery	None	Alive or dead of other cause	Dead (attributable to causes other than this cancer dx)	175	Diseases of Heart	One primary only	June	No/Unknown
1862345	1989	Female	68	White	Widowed	Rectum	8140/3: Adenocarcinoma, NOS	C20.9-Rectum, NOS	Poorly differentiated; Grade III	30	Blank(s)	Blank(s)	T3	Blank(s)	Blank(s)	N1	Blank(s)	Blank(s)	Blank(s)	Blank(s)	Blank(s)	Blank(s)	Blank(s)	Blank(s)	Blank(s)	Blank(s)	6	2	Blank(s)	Radiation after surgery	Beam radiation	Dead (attributable to this cancer dx)	Alive or dead due to cancer	22	Colon excluding Rectum	One primary only	May	No/Unknown
1862375	1990	Male	64	White	Married (including common law)	Rectum	8140/3: Adenocarcinoma, NOS	C20.9-Rectum, NOS	Poorly differentiated; Grade III	20	Blank(s)	Blank(s)	T3	Blank(s)	Blank(s)	N0	Blank(s)	Blank(s)	Blank(s)	Blank(s)	Blank(s)	Blank(s)	Blank(s)	Blank(s)	Blank(s)	Blank(s)	9	0	Blank(s)	No radiation and/or cancer-directed surgery	None	Dead (attributable to this cancer dx)	Alive or dead due to cancer	35	Colon excluding Rectum	One primary only	September	No/Unknown
1862532	1988	Female	72	White	Married (including common law)	Ascending Colon	8140/3: Adenocarcinoma, NOS	C18.2-Ascending colon	Moderately differentiated; Grade II	20	Blank(s)	Blank(s)	T3	Blank(s)	Blank(s)	N0	Blank(s)	Blank(s)	Blank(s)	Blank(s)	Blank(s)	Blank(s)	Blank(s)	Blank(s)	Blank(s)	Blank(s)	17	0	Blank(s)	No radiation and/or cancer-directed surgery	None	Alive or dead of other cause	Dead (attributable to causes other than this cancer dx)	197	Diseases of Heart	One primary only	August	No/Unknown
1862540	1988	Female	64	White	Married (including common law)	Descending Colon	8140/3: Adenocarcinoma, NOS	C18.6-Descending colon	Poorly differentiated; Grade III	30	Blank(s)	Blank(s)	T2	Blank(s)	Blank(s)	N2	Blank(s)	Blank(s)	Blank(s)	Blank(s)	Blank(s)	Blank(s)	Blank(s)	Blank(s)	Blank(s)	Blank(s)	12	4	Blank(s)	No radiation and/or cancer-directed surgery	None	Alive or dead of other cause	Dead (attributable to causes other than this cancer dx)	76	State DC not available or state DC available but no COD	One primary only	November	No/Unknown
1862648	1990	Male	66	White	Married (including common law)	Rectosigmoid Junction	8481/3: Mucin-producing adenocarcinoma	C19.9-Rectosigmoid junction	Moderately differentiated; Grade II	30	Blank(s)	Blank(s)	T3	Blank(s)	Blank(s)	N2	Blank(s)	Blank(s)	Blank(s)	Blank(s)	Blank(s)	Blank(s)	Blank(s)	Blank(s)	Blank(s)	Blank(s)	19	4	Blank(s)	Radiation after surgery	Beam radiation	Alive or dead of other cause	Dead (attributable to causes other than this cancer dx)	33	Cerebrovascular Diseases	One primary only	January	Yes
1862668	1990	Male	69	Asian or Pacific Islander	Single (never married)	Sigmoid Colon	8140/3: Adenocarcinoma, NOS	C18.7-Sigmoid colon	Poorly differentiated; Grade III	20	Blank(s)	Blank(s)	T3	Blank(s)	Blank(s)	N0	Blank(s)	Blank(s)	Blank(s)	Blank(s)	Blank(s)	Blank(s)	Blank(s)	Blank(s)	Blank(s)	Blank(s)	14	0	Blank(s)	No radiation and/or cancer-directed surgery	None	Dead (attributable to this cancer dx)	Alive or dead due to cancer	74	Colon excluding Rectum	One primary only	August	No/Unknown
1862690	1991	Female	63	White	Widowed	Cecum	8140/3: Adenocarcinoma, NOS	C18.0-Cecum	Moderately differentiated; Grade II	30	Blank(s)	Blank(s)	T3	Blank(s)	Blank(s)	N2	Blank(s)	Blank(s)	Blank(s)	Blank(s)	Blank(s)	Blank(s)	Blank(s)	Blank(s)	Blank(s)	Blank(s)	20	4	Blank(s)	No radiation and/or cancer-directed surgery	None	Dead (attributable to this cancer dx)	Alive or dead due to cancer	31	Colon excluding Rectum	One primary only	December	Yes
1862699	1991	Female	64	White	Married (including common law)	Sigmoid Colon	8140/3: Adenocarcinoma, NOS	C18.7-Sigmoid colon	Moderately differentiated; Grade II	20	Blank(s)	Blank(s)	T3	Blank(s)	Blank(s)	N0	Blank(s)	Blank(s)	Blank(s)	Blank(s)	Blank(s)	Blank(s)	Blank(s)	Blank(s)	Blank(s)	Blank(s)	29	0	Blank(s)	No radiation and/or cancer-directed surgery	None	Alive or dead of other cause	Alive or dead due to cancer	265	Alive	One primary only	November	No/Unknown
1862765	1988	Female	72	White	Married (including common law)	Splenic Flexure	8140/3: Adenocarcinoma, NOS	C18.5-Splenic flexure of colon	Moderately differentiated; Grade II	30	Blank(s)	Blank(s)	T4	Blank(s)	Blank(s)	N1	Blank(s)	Blank(s)	Blank(s)	Blank(s)	Blank(s)	Blank(s)	Blank(s)	Blank(s)	Blank(s)	Blank(s)	11	1	Blank(s)	No radiation and/or cancer-directed surgery	None	Alive or dead of other cause	Dead (attributable to causes other than this cancer dx)	54	Cerebrovascular Diseases	One primary only	August	No/Unknown
1862923	1988	Male	58	White	Married (including common law)	Sigmoid Colon	8140/3: Adenocarcinoma, NOS	C18.7-Sigmoid colon	Moderately differentiated; Grade II	20	Blank(s)	Blank(s)	T4	Blank(s)	Blank(s)	N0	Blank(s)	Blank(s)	Blank(s)	Blank(s)	Blank(s)	Blank(s)	Blank(s)	Blank(s)	Blank(s)	Blank(s)	11	0	Blank(s)	No radiation and/or cancer-directed surgery	None	Alive or dead of other cause	Dead (attributable to causes other than this cancer dx)	26	Diseases of Heart	One primary only	September	No/Unknown
1862944	1991	Female	78	White	Widowed	Hepatic Flexure	8140/3: Adenocarcinoma, NOS	C18.3-Hepatic flexure of colon	Moderately differentiated; Grade II	30	Blank(s)	Blank(s)	T3	Blank(s)	Blank(s)	N2	Blank(s)	Blank(s)	Blank(s)	Blank(s)	Blank(s)	Blank(s)	Blank(s)	Blank(s)	Blank(s)	Blank(s)	24	5	Blank(s)	No radiation and/or cancer-directed surgery	None	Alive or dead of other cause	Dead (attributable to causes other than this cancer dx)	87	Diseases of Heart	One primary only	October	No/Unknown
1862967	1988	Female	72	White	Widowed	Sigmoid Colon	8140/3: Adenocarcinoma, NOS	C18.7-Sigmoid colon	Moderately differentiated; Grade II	30	Blank(s)	Blank(s)	T3	Blank(s)	Blank(s)	N1	Blank(s)	Blank(s)	Blank(s)	Blank(s)	Blank(s)	Blank(s)	Blank(s)	Blank(s)	Blank(s)	Blank(s)	17	3	Blank(s)	No radiation and/or cancer-directed surgery	None	Alive or dead of other cause	Dead (attributable to causes other than this cancer dx)	205	Diseases of Heart	One primary only	August	No/Unknown
1863006	1988	Male	76	White	Married (including common law)	Ascending Colon	8140/3: Adenocarcinoma, NOS	C18.2-Ascending colon	Moderately differentiated; Grade II	30	Blank(s)	Blank(s)	T3	Blank(s)	Blank(s)	N3	Blank(s)	Blank(s)	Blank(s)	Blank(s)	Blank(s)	Blank(s)	Blank(s)	Blank(s)	Blank(s)	Blank(s)	28	1	Blank(s)	No radiation and/or cancer-directed surgery	None	Dead (attributable to this cancer dx)	Alive or dead due to cancer	90	Colon excluding Rectum	One primary only	September	No/Unknown
1863062	1988	Female	80	White	Married (including common law)	Cecum	8140/3: Adenocarcinoma, NOS	C18.0-Cecum	Moderately differentiated; Grade II	20	Blank(s)	Blank(s)	T3	Blank(s)	Blank(s)	N0	Blank(s)	Blank(s)	Blank(s)	Blank(s)	Blank(s)	Blank(s)	Blank(s)	Blank(s)	Blank(s)	Blank(s)	10	0	Blank(s)	No radiation and/or cancer-directed surgery	None	Alive or dead of other cause	Dead (attributable to causes other than this cancer dx)	137	Cerebrovascular Diseases	One primary only	June	No/Unknown
1863214	1988	Female	75	White	Married (including common law)	Sigmoid Colon	8140/3: Adenocarcinoma, NOS	C18.7-Sigmoid colon	Moderately differentiated; Grade II	30	Blank(s)	Blank(s)	T3	Blank(s)	Blank(s)	N1	Blank(s)	Blank(s)	Blank(s)	Blank(s)	Blank(s)	Blank(s)	Blank(s)	Blank(s)	Blank(s)	Blank(s)	10	1	Blank(s)	No radiation and/or cancer-directed surgery	None	Alive or dead of other cause	Dead (attributable to causes other than this cancer dx)	2	Diseases of Heart	One primary only	October	No/Unknown
1863325	1991	Male	77	White	Married (including common law)	Rectum	8140/3: Adenocarcinoma, NOS	C20.9-Rectum, NOS	Moderately differentiated; Grade II	30	Blank(s)	Blank(s)	T2	Blank(s)	Blank(s)	N1	Blank(s)	Blank(s)	Blank(s)	Blank(s)	Blank(s)	Blank(s)	Blank(s)	Blank(s)	Blank(s)	Blank(s)	3	1	Blank(s)	Radiation prior to surgery	Beam radiation	Dead (attributable to this cancer dx)	Alive or dead due to cancer	48	Colon excluding Rectum	One primary only	June	No/Unknown
1863344	1988	Female	79	White	Single (never married)	Cecum	8140/3: Adenocarcinoma, NOS	C18.0-Cecum	Poorly differentiated; Grade III	20	Blank(s)	Blank(s)	T3	Blank(s)	Blank(s)	N0	Blank(s)	Blank(s)	Blank(s)	Blank(s)	Blank(s)	Blank(s)	Blank(s)	Blank(s)	Blank(s)	Blank(s)	98	0	Blank(s)	No radiation and/or cancer-directed surgery	None	Alive or dead of other cause	Dead (attributable to causes other than this cancer dx)	144	Diseases of Heart	One primary only	March	No/Unknown
1863462	1989	Male	71	White	Single (never married)	Transverse Colon	8140/3: Adenocarcinoma, NOS	C18.4-Transverse colon	Well differentiated; Grade I	20	Blank(s)	Blank(s)	T3	Blank(s)	Blank(s)	N0	Blank(s)	Blank(s)	Blank(s)	Blank(s)	Blank(s)	Blank(s)	Blank(s)	Blank(s)	Blank(s)	Blank(s)	12	0	Blank(s)	No radiation and/or cancer-directed surgery	None	Alive or dead of other cause	Dead (attributable to causes other than this cancer dx)	155	Other Infectious and Parasitic Diseases including HIV	One primary only	May	No/Unknown
1863539	1989	Female	78	White	Widowed	Ascending Colon	8140/3: Adenocarcinoma, NOS	C18.2-Ascending colon	Moderately differentiated; Grade II	20	Blank(s)	Blank(s)	T3	Blank(s)	Blank(s)	N0	Blank(s)	Blank(s)	Blank(s)	Blank(s)	Blank(s)	Blank(s)	Blank(s)	Blank(s)	Blank(s)	Blank(s)	4	0	Blank(s)	No radiation and/or cancer-directed surgery	None	Alive or dead of other cause	Dead (attributable to causes other than this cancer dx)	68	Diseases of Heart	One primary only	October	No/Unknown
1863636	1990	Female	71	White	Married (including common law)	Cecum	8140/3: Adenocarcinoma, NOS	C18.0-Cecum	Poorly differentiated; Grade III	20	Blank(s)	Blank(s)	T4	Blank(s)	Blank(s)	N0	Blank(s)	Blank(s)	Blank(s)	Blank(s)	Blank(s)	Blank(s)	Blank(s)	Blank(s)	Blank(s)	Blank(s)	16	0	Blank(s)	No radiation and/or cancer-directed surgery	None	Alive or dead of other cause	Dead (attributable to causes other than this cancer dx)	153	Cerebrovascular Diseases	One primary only	February	No/Unknown
1863707	1988	Female	68	White	Widowed	Rectum	8480/3: Mucinous adenocarcinoma	C20.9-Rectum, NOS	Moderately differentiated; Grade II	10	Blank(s)	Blank(s)	T2	Blank(s)	Blank(s)	N0	Blank(s)	Blank(s)	Blank(s)	Blank(s)	Blank(s)	Blank(s)	Blank(s)	Blank(s)	Blank(s)	Blank(s)	2	0	Blank(s)	No radiation and/or cancer-directed surgery	None	Alive or dead of other cause	Dead (attributable to causes other than this cancer dx)	209	Cerebrovascular Diseases	One primary only	June	No/Unknown
1863713	1988	Female	60	White	Divorced	Ascending Colon	8140/3: Adenocarcinoma, NOS	C18.2-Ascending colon	Moderately differentiated; Grade II	20	Blank(s)	Blank(s)	T4	Blank(s)	Blank(s)	N0	Blank(s)	Blank(s)	Blank(s)	Blank(s)	Blank(s)	Blank(s)	Blank(s)	Blank(s)	Blank(s)	Blank(s)	98	0	Blank(s)	No radiation and/or cancer-directed surgery	None	Dead (attributable to this cancer dx)	Alive or dead due to cancer	169	Colon excluding Rectum	One primary only	August	No/Unknown
1863736	1990	Male	75	White	Married (including common law)	Rectosigmoid Junction	8140/3: Adenocarcinoma, NOS	C19.9-Rectosigmoid junction	Moderately differentiated; Grade II	20	Blank(s)	Blank(s)	T3	Blank(s)	Blank(s)	N0	Blank(s)	Blank(s)	Blank(s)	Blank(s)	Blank(s)	Blank(s)	Blank(s)	Blank(s)	Blank(s)	Blank(s)	1	0	Blank(s)	No radiation and/or cancer-directed surgery	None	Alive or dead of other cause	Dead (attributable to causes other than this cancer dx)	121	Chronic Obstructive Pulmonary Disease and Allied Cond	One primary only	January	No/Unknown
1863762	1988	Male	66	White	Married (including common law)	Rectosigmoid Junction	8140/3: Adenocarcinoma, NOS	C19.9-Rectosigmoid junction	Moderately differentiated; Grade II	10	Blank(s)	Blank(s)	T1	Blank(s)	Blank(s)	N0	Blank(s)	Blank(s)	Blank(s)	Blank(s)	Blank(s)	Blank(s)	Blank(s)	Blank(s)	Blank(s)	Blank(s)	0	98	Blank(s)	No radiation and/or cancer-directed surgery	None	Alive or dead of other cause	Dead (attributable to causes other than this cancer dx)	203	Diseases of Heart	One primary only	September	No/Unknown
1863887	1990	Male	70	White	Widowed	Ascending Colon	8140/3: Adenocarcinoma, NOS	C18.2-Ascending colon	Moderately differentiated; Grade II	30	Blank(s)	Blank(s)	T4	Blank(s)	Blank(s)	N1	Blank(s)	Blank(s)	Blank(s)	Blank(s)	Blank(s)	Blank(s)	Blank(s)	Blank(s)	Blank(s)	Blank(s)	12	2	Blank(s)	No radiation and/or cancer-directed surgery	None	Dead (attributable to this cancer dx)	Alive or dead due to cancer	17	Colon excluding Rectum	One primary only	November	Yes
1864045	1990	Male	51	White	Married (including common law)	Rectum	8140/3: Adenocarcinoma, NOS	C20.9-Rectum, NOS	Poorly differentiated; Grade III	20	Blank(s)	Blank(s)	T3	Blank(s)	Blank(s)	N0	Blank(s)	Blank(s)	Blank(s)	Blank(s)	Blank(s)	Blank(s)	Blank(s)	Blank(s)	Blank(s)	Blank(s)	9	0	Blank(s)	Radiation after surgery	Beam radiation	Alive or dead of other cause	Alive or dead due to cancer	278	Alive	One primary only	October	Yes
1864253	1990	Male	78	White	Married (including common law)	Sigmoid Colon	8140/3: Adenocarcinoma, NOS	C18.7-Sigmoid colon	Well differentiated; Grade I	20	Blank(s)	Blank(s)	T3	Blank(s)	Blank(s)	N0	Blank(s)	Blank(s)	Blank(s)	Blank(s)	Blank(s)	Blank(s)	Blank(s)	Blank(s)	Blank(s)	Blank(s)	11	0	Blank(s)	Radiation after surgery	Beam radiation	Alive or dead of other cause	Dead (attributable to causes other than this cancer dx)	63	Pneumonia and Influenza	One primary only	April	Yes
1864300	1990	Male	34	Black	Single (never married)	Sigmoid Colon	8140/3: Adenocarcinoma, NOS	C18.7-Sigmoid colon	Moderately differentiated; Grade II	30	Blank(s)	Blank(s)	T3	Blank(s)	Blank(s)	N1	Blank(s)	Blank(s)	Blank(s)	Blank(s)	Blank(s)	Blank(s)	Blank(s)	Blank(s)	Blank(s)	Blank(s)	11	2	Blank(s)	No radiation and/or cancer-directed surgery	None	Dead (attributable to this cancer dx)	Alive or dead due to cancer	67	Colon excluding Rectum	One primary only	January	Yes
1864525	1990	Female	75	White	Divorced	Transverse Colon	8140/3: Adenocarcinoma, NOS	C18.4-Transverse colon	Poorly differentiated; Grade III	20	Blank(s)	Blank(s)	T3	Blank(s)	Blank(s)	N0	Blank(s)	Blank(s)	Blank(s)	Blank(s)	Blank(s)	Blank(s)	Blank(s)	Blank(s)	Blank(s)	Blank(s)	32	0	Blank(s)	No radiation and/or cancer-directed surgery	None	Alive or dead of other cause	Dead (attributable to causes other than this cancer dx)	240	Alzheimers (ICD-9 and 10 only)	One primary only	January	No/Unknown
1864565	1988	Male	71	White	Married (including common law)	Splenic Flexure	8140/3: Adenocarcinoma, NOS	C18.5-Splenic flexure of colon	Well differentiated; Grade I	20	Blank(s)	Blank(s)	T3	Blank(s)	Blank(s)	N0	Blank(s)	Blank(s)	Blank(s)	Blank(s)	Blank(s)	Blank(s)	Blank(s)	Blank(s)	Blank(s)	Blank(s)	98	0	Blank(s)	No radiation and/or cancer-directed surgery	None	Alive or dead of other cause	Dead (attributable to causes other than this cancer dx)	216	Pneumonia and Influenza	One primary only	December	No/Unknown
1864743	1989	Female	68	Black	Single (never married)	Sigmoid Colon	8140/3: Adenocarcinoma, NOS	C18.7-Sigmoid colon	Moderately differentiated; Grade II	20	Blank(s)	Blank(s)	T3	Blank(s)	Blank(s)	N0	Blank(s)	Blank(s)	Blank(s)	Blank(s)	Blank(s)	Blank(s)	Blank(s)	Blank(s)	Blank(s)	Blank(s)	98	0	Blank(s)	No radiation and/or cancer-directed surgery	None	Alive or dead of other cause	Dead (attributable to causes other than this cancer dx)	33	Other Cause of Death	One primary only	April	No/Unknown
1864853	1988	Female	68	Asian or Pacific Islander	Widowed	Sigmoid Colon	8140/3: Adenocarcinoma, NOS	C18.7-Sigmoid colon	Moderately differentiated; Grade II	20	Blank(s)	Blank(s)	T4	Blank(s)	Blank(s)	N0	Blank(s)	Blank(s)	Blank(s)	Blank(s)	Blank(s)	Blank(s)	Blank(s)	Blank(s)	Blank(s)	Blank(s)	6	0	Blank(s)	No radiation and/or cancer-directed surgery	None	Dead (attributable to this cancer dx)	Alive or dead due to cancer	255	Colon excluding Rectum	One primary only	March	No/Unknown
1864895	1988	Male	76	Asian or Pacific Islander	Unknown	Ascending Colon	8140/3: Adenocarcinoma, NOS	C18.2-Ascending colon	Poorly differentiated; Grade III	20	Blank(s)	Blank(s)	T4	Blank(s)	Blank(s)	N0	Blank(s)	Blank(s)	Blank(s)	Blank(s)	Blank(s)	Blank(s)	Blank(s)	Blank(s)	Blank(s)	Blank(s)	29	0	Blank(s)	No radiation and/or cancer-directed surgery	None	Alive or dead of other cause	Dead (attributable to causes other than this cancer dx)	173	Pneumonia and Influenza	One primary only	October	No/Unknown
1865061	1989	Female	80	Asian or Pacific Islander	Single (never married)	Rectum	8140/3: Adenocarcinoma, NOS	C20.9-Rectum, NOS	Poorly differentiated; Grade III	20	Blank(s)	Blank(s)	T4	Blank(s)	Blank(s)	N0	Blank(s)	Blank(s)	Blank(s)	Blank(s)	Blank(s)	Blank(s)	Blank(s)	Blank(s)	Blank(s)	Blank(s)	5	0	Blank(s)	Radiation after surgery	Beam radiation	Alive or dead of other cause	Dead (attributable to causes other than this cancer dx)	25	State DC not available or state DC available but no COD	One primary only	May	No/Unknown
1865109	1988	Male	32	White	Married (including common law)	Rectum	8140/3: Adenocarcinoma, NOS	C20.9-Rectum, NOS	Moderately differentiated; Grade II	30	Blank(s)	Blank(s)	T4	Blank(s)	Blank(s)	N3	Blank(s)	Blank(s)	Blank(s)	Blank(s)	Blank(s)	Blank(s)	Blank(s)	Blank(s)	Blank(s)	Blank(s)	98	97	Blank(s)	Radiation before and after surgery	Beam radiation	Dead (attributable to this cancer dx)	Alive or dead due to cancer	30	Colon excluding Rectum	One primary only	November	No/Unknown
1865151	1990	Female	77	Asian or Pacific Islander	Married (including common law)	Cecum	8140/3: Adenocarcinoma, NOS	C18.0-Cecum	Moderately differentiated; Grade II	20	Blank(s)	Blank(s)	T3	Blank(s)	Blank(s)	N0	Blank(s)	Blank(s)	Blank(s)	Blank(s)	Blank(s)	Blank(s)	Blank(s)	Blank(s)	Blank(s)	Blank(s)	11	0	Blank(s)	No radiation and/or cancer-directed surgery	None	Dead (attributable to this cancer dx)	Alive or dead due to cancer	50	Colon excluding Rectum	One primary only	October	No/Unknown
1865207	1990	Female	59	Asian or Pacific Islander	Married (including common law)	Descending Colon	8140/3: Adenocarcinoma, NOS	C18.6-Descending colon	Poorly differentiated; Grade III	20	Blank(s)	Blank(s)	T3	Blank(s)	Blank(s)	N0	Blank(s)	Blank(s)	Blank(s)	Blank(s)	Blank(s)	Blank(s)	Blank(s)	Blank(s)	Blank(s)	Blank(s)	8	0	Blank(s)	No radiation and/or cancer-directed surgery	None	Dead (attributable to this cancer dx)	Alive or dead due to cancer	103	Colon excluding Rectum	One primary only	August	Yes
1865279	1990	Female	76	White	Widowed	Cecum	8481/3: Mucin-producing adenocarcinoma	C18.0-Cecum	Moderately differentiated; Grade II	20	Blank(s)	Blank(s)	T3	Blank(s)	Blank(s)	N0	Blank(s)	Blank(s)	Blank(s)	Blank(s)	Blank(s)	Blank(s)	Blank(s)	Blank(s)	Blank(s)	Blank(s)	14	0	Blank(s)	No radiation and/or cancer-directed surgery	None	Alive or dead of other cause	Dead (attributable to causes other than this cancer dx)	106	Diseases of Heart	One primary only	March	No/Unknown
1865350	1991	Male	71	White	Married (including common law)	Cecum	8140/3: Adenocarcinoma, NOS	C18.0-Cecum	Moderately differentiated; Grade II	30	Blank(s)	Blank(s)	T3	Blank(s)	Blank(s)	N2	Blank(s)	Blank(s)	Blank(s)	Blank(s)	Blank(s)	Blank(s)	Blank(s)	Blank(s)	Blank(s)	Blank(s)	7	4	Blank(s)	No radiation and/or cancer-directed surgery	None	Alive or dead of other cause	Dead (attributable to causes other than this cancer dx)	58	Pneumonia and Influenza	One primary only	November	Yes
1865396	1989	Male	50	White	Married (including common law)	Hepatic Flexure	8140/3: Adenocarcinoma, NOS	C18.3-Hepatic flexure of colon	Moderately differentiated; Grade II	20	Blank(s)	Blank(s)	T3	Blank(s)	Blank(s)	N0	Blank(s)	Blank(s)	Blank(s)	Blank(s)	Blank(s)	Blank(s)	Blank(s)	Blank(s)	Blank(s)	Blank(s)	6	0	Blank(s)	No radiation and/or cancer-directed surgery	None	Alive or dead of other cause	Dead (attributable to causes other than this cancer dx)	289	Aortic Aneurysm and Dissection	One primary only	May	No/Unknown
1865431	1989	Female	72	White	Widowed	Sigmoid Colon	8140/3: Adenocarcinoma, NOS	C18.7-Sigmoid colon	Moderately differentiated; Grade II	20	Blank(s)	Blank(s)	T3	Blank(s)	Blank(s)	N0	Blank(s)	Blank(s)	Blank(s)	Blank(s)	Blank(s)	Blank(s)	Blank(s)	Blank(s)	Blank(s)	Blank(s)	10	0	Blank(s)	No radiation and/or cancer-directed surgery	None	Dead (attributable to this cancer dx)	Alive or dead due to cancer	59	Colon excluding Rectum	One primary only	November	No/Unknown
1865559	1991	Male	62	White	Single (never married)	Sigmoid Colon	8140/3: Adenocarcinoma, NOS	C18.7-Sigmoid colon	Moderately differentiated; Grade II	20	Blank(s)	Blank(s)	T3	Blank(s)	Blank(s)	N0	Blank(s)	Blank(s)	Blank(s)	Blank(s)	Blank(s)	Blank(s)	Blank(s)	Blank(s)	Blank(s)	Blank(s)	18	0	Blank(s)	No radiation and/or cancer-directed surgery	None	Alive or dead of other cause	Dead (attributable to causes other than this cancer dx)	99	Other Cause of Death	One primary only	November	No/Unknown
1865645	1991	Male	79	White	Married (including common law)	Transverse Colon	8140/3: Adenocarcinoma, NOS	C18.4-Transverse colon	Moderately differentiated; Grade II	20	Blank(s)	Blank(s)	T3	Blank(s)	Blank(s)	N0	Blank(s)	Blank(s)	Blank(s)	Blank(s)	Blank(s)	Blank(s)	Blank(s)	Blank(s)	Blank(s)	Blank(s)	2	0	Blank(s)	No radiation and/or cancer-directed surgery	None	Alive or dead of other cause	Dead (attributable to causes other than this cancer dx)	103	Diseases of Heart	One primary only	July	No/Unknown
1866003	1988	Male	68	Asian or Pacific Islander	Married (including common law)	Hepatic Flexure	8140/3: Adenocarcinoma, NOS	C18.3-Hepatic flexure of colon	Poorly differentiated; Grade III	10	Blank(s)	Blank(s)	T2	Blank(s)	Blank(s)	N0	Blank(s)	Blank(s)	Blank(s)	Blank(s)	Blank(s)	Blank(s)	Blank(s)	Blank(s)	Blank(s)	Blank(s)	19	0	Blank(s)	No radiation and/or cancer-directed surgery	None	Alive or dead of other cause	Dead (attributable to causes other than this cancer dx)	232	Other Cause of Death	One primary only	December	No/Unknown
1866008	1988	Female	60	Black	Single (never married)	Ascending Colon	8140/3: Adenocarcinoma, NOS	C18.2-Ascending colon	Moderately differentiated; Grade II	20	Blank(s)	Blank(s)	T3	Blank(s)	Blank(s)	N0	Blank(s)	Blank(s)	Blank(s)	Blank(s)	Blank(s)	Blank(s)	Blank(s)	Blank(s)	Blank(s)	Blank(s)	42	0	Blank(s)	No radiation and/or cancer-directed surgery	None	Alive or dead of other cause	Dead (attributable to causes other than this cancer dx)	9	Diseases of Heart	One primary only	August	No/Unknown
1866237	1990	Male	41	White	Married (including common law)	Transverse Colon	8480/3: Mucinous adenocarcinoma	C18.4-Transverse colon	Moderately differentiated; Grade II	30	Blank(s)	Blank(s)	T3	Blank(s)	Blank(s)	N1	Blank(s)	Blank(s)	Blank(s)	Blank(s)	Blank(s)	Blank(s)	Blank(s)	Blank(s)	Blank(s)	Blank(s)	4	2	Blank(s)	No radiation and/or cancer-directed surgery	None	Dead (attributable to this cancer dx)	Alive or dead due to cancer	45	Colon excluding Rectum	One primary only	February	Yes
1866317	1990	Male	62	White	Married (including common law)	Splenic Flexure	8140/3: Adenocarcinoma, NOS	C18.5-Splenic flexure of colon	Moderately differentiated; Grade II	20	Blank(s)	Blank(s)	T3	Blank(s)	Blank(s)	N0	Blank(s)	Blank(s)	Blank(s)	Blank(s)	Blank(s)	Blank(s)	Blank(s)	Blank(s)	Blank(s)	Blank(s)	7	0	Blank(s)	No radiation and/or cancer-directed surgery	None	Alive or dead of other cause	Alive or dead due to cancer	286	Alive	One primary only	February	No/Unknown
1866319	1991	Female	70	White	Widowed	Hepatic Flexure	8140/3: Adenocarcinoma, NOS	C18.3-Hepatic flexure of colon	Moderately differentiated; Grade II	10	Blank(s)	Blank(s)	T2	Blank(s)	Blank(s)	N0	Blank(s)	Blank(s)	Blank(s)	Blank(s)	Blank(s)	Blank(s)	Blank(s)	Blank(s)	Blank(s)	Blank(s)	13	0	Blank(s)	No radiation and/or cancer-directed surgery	None	Alive or dead of other cause	Alive or dead due to cancer	271	Alive	One primary only	May	No/Unknown
1866321	1990	Female	74	White	Married (including common law)	Rectosigmoid Junction	8140/3: Adenocarcinoma, NOS	C19.9-Rectosigmoid junction	Poorly differentiated; Grade III	20	Blank(s)	Blank(s)	T4	Blank(s)	Blank(s)	N0	Blank(s)	Blank(s)	Blank(s)	Blank(s)	Blank(s)	Blank(s)	Blank(s)	Blank(s)	Blank(s)	Blank(s)	14	0	Blank(s)	No radiation and/or cancer-directed surgery	None	Alive or dead of other cause	Dead (attributable to causes other than this cancer dx)	188	Alzheimers (ICD-9 and 10 only)	One primary only	November	No/Unknown
1866329	1988	Male	64	Asian or Pacific Islander	Married (including common law)	Sigmoid Colon	8140/3: Adenocarcinoma, NOS	C18.7-Sigmoid colon	Well differentiated; Grade I	20	Blank(s)	Blank(s)	T3	Blank(s)	Blank(s)	N0	Blank(s)	Blank(s)	Blank(s)	Blank(s)	Blank(s)	Blank(s)	Blank(s)	Blank(s)	Blank(s)	Blank(s)	19	0	Blank(s)	No radiation and/or cancer-directed surgery	None	Alive or dead of other cause	Alive or dead due to cancer	39	Alive	One primary only	April	No/Unknown
1866332	1989	Female	75	White	Widowed	Rectosigmoid Junction	8140/3: Adenocarcinoma, NOS	C19.9-Rectosigmoid junction	Moderately differentiated; Grade II	10	Blank(s)	Blank(s)	T2	Blank(s)	Blank(s)	N0	Blank(s)	Blank(s)	Blank(s)	Blank(s)	Blank(s)	Blank(s)	Blank(s)	Blank(s)	Blank(s)	Blank(s)	5	0	Blank(s)	No radiation and/or cancer-directed surgery	None	Alive or dead of other cause	Dead (attributable to causes other than this cancer dx)	163	Chronic Obstructive Pulmonary Disease and Allied Cond	One primary only	June	No/Unknown
1866361	1989	Male	74	White	Married (including common law)	Rectum	8140/3: Adenocarcinoma, NOS	C20.9-Rectum, NOS	Moderately differentiated; Grade II	10	Blank(s)	Blank(s)	T2	Blank(s)	Blank(s)	N0	Blank(s)	Blank(s)	Blank(s)	Blank(s)	Blank(s)	Blank(s)	Blank(s)	Blank(s)	Blank(s)	Blank(s)	2	0	Blank(s)	No radiation and/or cancer-directed surgery	None	Alive or dead of other cause	Dead (attributable to causes other than this cancer dx)	189	Diseases of Heart	One primary only	May	No/Unknown
1866440	1990	Male	49	White	Married (including common law)	Sigmoid Colon	8140/3: Adenocarcinoma, NOS	C18.7-Sigmoid colon	Moderately differentiated; Grade II	10	Blank(s)	Blank(s)	T1	Blank(s)	Blank(s)	N0	Blank(s)	Blank(s)	Blank(s)	Blank(s)	Blank(s)	Blank(s)	Blank(s)	Blank(s)	Blank(s)	Blank(s)	2	0	Blank(s)	No radiation and/or cancer-directed surgery	None	Alive or dead of other cause	Alive or dead due to cancer	281	Alive	One primary only	July	No/Unknown
1866454	1991	Female	71	White	Widowed	Cecum	8140/3: Adenocarcinoma, NOS	C18.0-Cecum	Moderately differentiated; Grade II	20	Blank(s)	Blank(s)	T3	Blank(s)	Blank(s)	N0	Blank(s)	Blank(s)	Blank(s)	Blank(s)	Blank(s)	Blank(s)	Blank(s)	Blank(s)	Blank(s)	Blank(s)	10	0	Blank(s)	No radiation and/or cancer-directed surgery	None	Alive or dead of other cause	Dead (attributable to causes other than this cancer dx)	240	Diseases of Heart	One primary only	May	No/Unknown
1866521	1988	Female	80	White	Widowed	Cecum	8140/3: Adenocarcinoma, NOS	C18.0-Cecum	Moderately differentiated; Grade II	20	Blank(s)	Blank(s)	T3	Blank(s)	Blank(s)	N0	Blank(s)	Blank(s)	Blank(s)	Blank(s)	Blank(s)	Blank(s)	Blank(s)	Blank(s)	Blank(s)	Blank(s)	15	0	Blank(s)	No radiation and/or cancer-directed surgery	None	Alive or dead of other cause	Dead (attributable to causes other than this cancer dx)	86	Other Cause of Death	One primary only	July	No/Unknown
1866535	1990	Male	75	White	Married (including common law)	Cecum	8140/3: Adenocarcinoma, NOS	C18.0-Cecum	Poorly differentiated; Grade III	20	Blank(s)	Blank(s)	T4	Blank(s)	Blank(s)	N0	Blank(s)	Blank(s)	Blank(s)	Blank(s)	Blank(s)	Blank(s)	Blank(s)	Blank(s)	Blank(s)	Blank(s)	8	0	Blank(s)	No radiation and/or cancer-directed surgery	None	Alive or dead of other cause	Dead (attributable to causes other than this cancer dx)	95	Diseases of Heart	One primary only	November	No/Unknown
1866615	1990	Female	67	White	Married (including common law)	Rectosigmoid Junction	8481/3: Mucin-producing adenocarcinoma	C19.9-Rectosigmoid junction	Moderately differentiated; Grade II	20	Blank(s)	Blank(s)	T3	Blank(s)	Blank(s)	N0	Blank(s)	Blank(s)	Blank(s)	Blank(s)	Blank(s)	Blank(s)	Blank(s)	Blank(s)	Blank(s)	Blank(s)	0	98	Blank(s)	Radiation prior to surgery	Beam radiation	Dead (attributable to this cancer dx)	Alive or dead due to cancer	20	Rectum and Rectosigmoid Junction	One primary only	August	No/Unknown
1866658	1991	Male	70	Asian or Pacific Islander	Married (including common law)	Cecum	8140/3: Adenocarcinoma, NOS	C18.0-Cecum	Moderately differentiated; Grade II	20	Blank(s)	Blank(s)	T3	Blank(s)	Blank(s)	N0	Blank(s)	Blank(s)	Blank(s)	Blank(s)	Blank(s)	Blank(s)	Blank(s)	Blank(s)	Blank(s)	Blank(s)	7	0	Blank(s)	No radiation and/or cancer-directed surgery	None	Alive or dead of other cause	Alive or dead due to cancer	271	Alive	One primary only	May	No/Unknown
1866705	1990	Male	58	White	Married (including common law)	Cecum	8140/3: Adenocarcinoma, NOS	C18.0-Cecum	Poorly differentiated; Grade III	30	Blank(s)	Blank(s)	T4	Blank(s)	Blank(s)	N1	Blank(s)	Blank(s)	Blank(s)	Blank(s)	Blank(s)	Blank(s)	Blank(s)	Blank(s)	Blank(s)	Blank(s)	4	3	Blank(s)	No radiation and/or cancer-directed surgery	None	Dead (attributable to this cancer dx)	Alive or dead due to cancer	74	Colon excluding Rectum	One primary only	April	Yes
1866771	1990	Female	74	Asian or Pacific Islander	Widowed	Rectosigmoid Junction	8140/3: Adenocarcinoma, NOS	C19.9-Rectosigmoid junction	Moderately differentiated; Grade II	30	Blank(s)	Blank(s)	T4	Blank(s)	Blank(s)	N2	Blank(s)	Blank(s)	Blank(s)	Blank(s)	Blank(s)	Blank(s)	Blank(s)	Blank(s)	Blank(s)	Blank(s)	10	6	Blank(s)	No radiation and/or cancer-directed surgery	None	Dead (attributable to this cancer dx)	Alive or dead due to cancer	24	Colon excluding Rectum	One primary only	April	No/Unknown
1866888	1988	Male	71	White	Married (including common law)	Sigmoid Colon	8140/3: Adenocarcinoma, NOS	C18.7-Sigmoid colon	Moderately differentiated; Grade II	10	Blank(s)	Blank(s)	T2	Blank(s)	Blank(s)	N0	Blank(s)	Blank(s)	Blank(s)	Blank(s)	Blank(s)	Blank(s)	Blank(s)	Blank(s)	Blank(s)	Blank(s)	6	0	Blank(s)	No radiation and/or cancer-directed surgery	None	Alive or dead of other cause	Dead (attributable to causes other than this cancer dx)	290	Diseases of Heart	One primary only	October	No/Unknown
1866894	1990	Female	43	White	Married (including common law)	Rectum	8140/3: Adenocarcinoma, NOS	C20.9-Rectum, NOS	Moderately differentiated; Grade II	20	Blank(s)	Blank(s)	T3	Blank(s)	Blank(s)	N0	Blank(s)	Blank(s)	Blank(s)	Blank(s)	Blank(s)	Blank(s)	Blank(s)	Blank(s)	Blank(s)	Blank(s)	98	0	Blank(s)	Radiation after surgery	Beam radiation	Alive or dead of other cause	Alive or dead due to cancer	274	Alive	One primary only	July	Yes
1867145	1990	Female	55	White	Divorced	Cecum	8140/3: Adenocarcinoma, NOS	C18.0-Cecum	Poorly differentiated; Grade III	30	Blank(s)	Blank(s)	T3	Blank(s)	Blank(s)	N2	Blank(s)	Blank(s)	Blank(s)	Blank(s)	Blank(s)	Blank(s)	Blank(s)	Blank(s)	Blank(s)	Blank(s)	13	5	Blank(s)	No radiation and/or cancer-directed surgery	None	Alive or dead of other cause	Alive or dead due to cancer	284	Alive	One primary only	April	Yes
1867328	1990	Male	78	Black	Married (including common law)	Descending Colon	8140/3: Adenocarcinoma, NOS	C18.6-Descending colon	Well differentiated; Grade I	20	Blank(s)	Blank(s)	T3	Blank(s)	Blank(s)	N0	Blank(s)	Blank(s)	Blank(s)	Blank(s)	Blank(s)	Blank(s)	Blank(s)	Blank(s)	Blank(s)	Blank(s)	6	0	Blank(s)	No radiation and/or cancer-directed surgery	None	Alive or dead of other cause	Dead (attributable to causes other than this cancer dx)	171	Other Cause of Death	One primary only	June	No/Unknown
1867445	1990	Female	68	White	Widowed	Rectum	8140/3: Adenocarcinoma, NOS	C20.9-Rectum, NOS	Moderately differentiated; Grade II	20	Blank(s)	Blank(s)	T3	Blank(s)	Blank(s)	N0	Blank(s)	Blank(s)	Blank(s)	Blank(s)	Blank(s)	Blank(s)	Blank(s)	Blank(s)	Blank(s)	Blank(s)	0	98	Blank(s)	No radiation and/or cancer-directed surgery	None	Alive or dead of other cause	Dead (attributable to causes other than this cancer dx)	198	Pneumonia and Influenza	One primary only	November	No/Unknown
1867494	1991	Female	49	White	Married (including common law)	Sigmoid Colon	8140/3: Adenocarcinoma, NOS	C18.7-Sigmoid colon	Moderately differentiated; Grade II	20	Blank(s)	Blank(s)	T3	Blank(s)	Blank(s)	N0	Blank(s)	Blank(s)	Blank(s)	Blank(s)	Blank(s)	Blank(s)	Blank(s)	Blank(s)	Blank(s)	Blank(s)	4	0	Blank(s)	No radiation and/or cancer-directed surgery	None	Alive or dead of other cause	Alive or dead due to cancer	271	Alive	One primary only	May	Yes
1867678	1991	Female	69	Black	Widowed	Cecum	8140/3: Adenocarcinoma, NOS	C18.0-Cecum	Moderately differentiated; Grade II	20	Blank(s)	Blank(s)	T3	Blank(s)	Blank(s)	N0	Blank(s)	Blank(s)	Blank(s)	Blank(s)	Blank(s)	Blank(s)	Blank(s)	Blank(s)	Blank(s)	Blank(s)	35	0	Blank(s)	No radiation and/or cancer-directed surgery	None	Alive or dead of other cause	Alive or dead due to cancer	270	Alive	One primary only	June	No/Unknown
1867683	1989	Male	49	White	Married (including common law)	Sigmoid Colon	8140/3: Adenocarcinoma, NOS	C18.7-Sigmoid colon	Moderately differentiated; Grade II	30	Blank(s)	Blank(s)	T3	Blank(s)	Blank(s)	N1	Blank(s)	Blank(s)	Blank(s)	Blank(s)	Blank(s)	Blank(s)	Blank(s)	Blank(s)	Blank(s)	Blank(s)	10	1	Blank(s)	No radiation and/or cancer-directed surgery	None	Alive or dead of other cause	Alive or dead due to cancer	294	Alive	One primary only	June	No/Unknown
1867685	1989	Male	75	White	Married (including common law)	Cecum	8140/3: Adenocarcinoma, NOS	C18.0-Cecum	Moderately differentiated; Grade II	30	Blank(s)	Blank(s)	T3	Blank(s)	Blank(s)	N3	Blank(s)	Blank(s)	Blank(s)	Blank(s)	Blank(s)	Blank(s)	Blank(s)	Blank(s)	Blank(s)	Blank(s)	16	3	Blank(s)	No radiation and/or cancer-directed surgery	None	Dead (attributable to this cancer dx)	Alive or dead due to cancer	7	Colon excluding Rectum	One primary only	February	No/Unknown
1867688	1990	Female	70	White	Widowed	Ascending Colon	8140/3: Adenocarcinoma, NOS	C18.2-Ascending colon	Poorly differentiated; Grade III	20	Blank(s)	Blank(s)	T3	Blank(s)	Blank(s)	N0	Blank(s)	Blank(s)	Blank(s)	Blank(s)	Blank(s)	Blank(s)	Blank(s)	Blank(s)	Blank(s)	Blank(s)	3	0	Blank(s)	No radiation and/or cancer-directed surgery	None	Alive or dead of other cause	Dead (attributable to causes other than this cancer dx)	257	Diseases of Heart	One primary only	March	Yes
1867695	1990	Female	80	White	Widowed	Sigmoid Colon	8140/3: Adenocarcinoma, NOS	C18.7-Sigmoid colon	Well differentiated; Grade I	20	Blank(s)	Blank(s)	T3	Blank(s)	Blank(s)	N0	Blank(s)	Blank(s)	Blank(s)	Blank(s)	Blank(s)	Blank(s)	Blank(s)	Blank(s)	Blank(s)	Blank(s)	8	0	Blank(s)	No radiation and/or cancer-directed surgery	None	Dead (attributable to this cancer dx)	Alive or dead due to cancer	9	Colon excluding Rectum	One primary only	October	No/Unknown
1867775	1991	Female	36	Asian or Pacific Islander	Married (including common law)	Rectum	8140/3: Adenocarcinoma, NOS	C20.9-Rectum, NOS	Moderately differentiated; Grade II	20	Blank(s)	Blank(s)	T3	Blank(s)	Blank(s)	N0	Blank(s)	Blank(s)	Blank(s)	Blank(s)	Blank(s)	Blank(s)	Blank(s)	Blank(s)	Blank(s)	Blank(s)	5	0	Blank(s)	Radiation after surgery	Beam radiation	Dead (attributable to this cancer dx)	Alive or dead due to cancer	26	Rectum and Rectosigmoid Junction	One primary only	June	Yes
1867836	1988	Male	52	White	Married (including common law)	Ascending Colon	8140/3: Adenocarcinoma, NOS	C18.2-Ascending colon	Well differentiated; Grade I	20	Blank(s)	Blank(s)	T4	Blank(s)	Blank(s)	N0	Blank(s)	Blank(s)	Blank(s)	Blank(s)	Blank(s)	Blank(s)	Blank(s)	Blank(s)	Blank(s)	Blank(s)	43	0	Blank(s)	No radiation and/or cancer-directed surgery	None	Alive or dead of other cause	Alive or dead due to cancer	301	Alive	One primary only	November	Yes
1867900	1989	Male	51	Black	Single (never married)	Rectum	8140/3: Adenocarcinoma, NOS	C20.9-Rectum, NOS	Moderately differentiated; Grade II	20	Blank(s)	Blank(s)	T3	Blank(s)	Blank(s)	N0	Blank(s)	Blank(s)	Blank(s)	Blank(s)	Blank(s)	Blank(s)	Blank(s)	Blank(s)	Blank(s)	Blank(s)	26	0	Blank(s)	Radiation after surgery	Beam radiation	Dead (attributable to this cancer dx)	Alive or dead due to cancer	34	Rectum and Rectosigmoid Junction	One primary only	May	No/Unknown
1867934	1991	Female	79	White	Widowed	Sigmoid Colon	8481/3: Mucin-producing adenocarcinoma	C18.7-Sigmoid colon	Moderately differentiated; Grade II	20	Blank(s)	Blank(s)	T3	Blank(s)	Blank(s)	N0	Blank(s)	Blank(s)	Blank(s)	Blank(s)	Blank(s)	Blank(s)	Blank(s)	Blank(s)	Blank(s)	Blank(s)	10	0	Blank(s)	No radiation and/or cancer-directed surgery	None	Alive or dead of other cause	Dead (attributable to causes other than this cancer dx)	144	Diseases of Heart	One primary only	July	No/Unknown
1868035	1991	Male	76	White	Married (including common law)	Splenic Flexure	8140/3: Adenocarcinoma, NOS	C18.5-Splenic flexure of colon	Moderately differentiated; Grade II	20	Blank(s)	Blank(s)	T4	Blank(s)	Blank(s)	N0	Blank(s)	Blank(s)	Blank(s)	Blank(s)	Blank(s)	Blank(s)	Blank(s)	Blank(s)	Blank(s)	Blank(s)	5	0	Blank(s)	No radiation and/or cancer-directed surgery	None	Alive or dead of other cause	Dead (attributable to causes other than this cancer dx)	164	Diseases of Heart	One primary only	August	Yes
1868066	1988	Male	58	White	Married (including common law)	Sigmoid Colon	8140/3: Adenocarcinoma, NOS	C18.7-Sigmoid colon	Poorly differentiated; Grade III	20	Blank(s)	Blank(s)	T3	Blank(s)	Blank(s)	N0	Blank(s)	Blank(s)	Blank(s)	Blank(s)	Blank(s)	Blank(s)	Blank(s)	Blank(s)	Blank(s)	Blank(s)	16	0	Blank(s)	No radiation and/or cancer-directed surgery	None	Alive or dead of other cause	Alive or dead due to cancer	304	Alive	One primary only	August	No/Unknown
1868079	1991	Male	68	White	Married (including common law)	Rectum	8140/3: Adenocarcinoma, NOS	C20.9-Rectum, NOS	Poorly differentiated; Grade III	20	Blank(s)	Blank(s)	T3	Blank(s)	Blank(s)	N0	Blank(s)	Blank(s)	Blank(s)	Blank(s)	Blank(s)	Blank(s)	Blank(s)	Blank(s)	Blank(s)	Blank(s)	7	0	Blank(s)	No radiation and/or cancer-directed surgery	None	Dead (attributable to this cancer dx)	Alive or dead due to cancer	37	Rectum and Rectosigmoid Junction	One primary only	December	Yes
1868206	1991	Female	52	White	Single (never married)	Rectum	8140/3: Adenocarcinoma, NOS	C20.9-Rectum, NOS	Moderately differentiated; Grade II	30	Blank(s)	Blank(s)	T3	Blank(s)	Blank(s)	N1	Blank(s)	Blank(s)	Blank(s)	Blank(s)	Blank(s)	Blank(s)	Blank(s)	Blank(s)	Blank(s)	Blank(s)	10	2	Blank(s)	Radiation after surgery	Beam radiation	Dead (attributable to this cancer dx)	Alive or dead due to cancer	19	Rectum and Rectosigmoid Junction	One primary only	November	Yes
1868294	1991	Male	79	Asian or Pacific Islander	Married (including common law)	Descending Colon	8140/3: Adenocarcinoma, NOS	C18.6-Descending colon	Moderately differentiated; Grade II	20	Blank(s)	Blank(s)	T3	Blank(s)	Blank(s)	N0	Blank(s)	Blank(s)	Blank(s)	Blank(s)	Blank(s)	Blank(s)	Blank(s)	Blank(s)	Blank(s)	Blank(s)	3	0	Blank(s)	No radiation and/or cancer-directed surgery	None	Dead (attributable to this cancer dx)	Alive or dead due to cancer	155	Stomach and Duodenal Ulcers	One primary only	October	No/Unknown
1868316	1990	Male	76	White	Married (including common law)	Rectosigmoid Junction	8140/3: Adenocarcinoma, NOS	C19.9-Rectosigmoid junction	Moderately differentiated; Grade II	20	Blank(s)	Blank(s)	T3	Blank(s)	Blank(s)	N0	Blank(s)	Blank(s)	Blank(s)	Blank(s)	Blank(s)	Blank(s)	Blank(s)	Blank(s)	Blank(s)	Blank(s)	14	0	Blank(s)	No radiation and/or cancer-directed surgery	None	Dead (attributable to this cancer dx)	Alive or dead due to cancer	64	Colon excluding Rectum	One primary only	February	No/Unknown
1868492	1989	Male	68	Black	Single (never married)	Rectum	8140/3: Adenocarcinoma, NOS	C20.9-Rectum, NOS	Moderately differentiated; Grade II	10	Blank(s)	Blank(s)	T1	Blank(s)	Blank(s)	N0	Blank(s)	Blank(s)	Blank(s)	Blank(s)	Blank(s)	Blank(s)	Blank(s)	Blank(s)	Blank(s)	Blank(s)	2	0	Blank(s)	No radiation and/or cancer-directed surgery	None	Dead (attributable to this cancer dx)	Alive or dead due to cancer	105	Colon excluding Rectum	One primary only	May	No/Unknown
1868540	1990	Male	70	Asian or Pacific Islander	Married (including common law)	Sigmoid Colon	8140/3: Adenocarcinoma, NOS	C18.7-Sigmoid colon	Moderately differentiated; Grade II	20	Blank(s)	Blank(s)	T3	Blank(s)	Blank(s)	N0	Blank(s)	Blank(s)	Blank(s)	Blank(s)	Blank(s)	Blank(s)	Blank(s)	Blank(s)	Blank(s)	Blank(s)	26	0	Blank(s)	No radiation and/or cancer-directed surgery	None	Dead (attributable to this cancer dx)	Alive or dead due to cancer	22	Rectum and Rectosigmoid Junction	One primary only	December	No/Unknown
1868631	1990	Female	45	Asian or Pacific Islander	Divorced	Rectum	8140/3: Adenocarcinoma, NOS	C20.9-Rectum, NOS	Moderately differentiated; Grade II	20	Blank(s)	Blank(s)	T3	Blank(s)	Blank(s)	N0	Blank(s)	Blank(s)	Blank(s)	Blank(s)	Blank(s)	Blank(s)	Blank(s)	Blank(s)	Blank(s)	Blank(s)	2	0	Blank(s)	Radiation before and after surgery	Beam radiation	Dead (attributable to this cancer dx)	Alive or dead due to cancer	73	Colon excluding Rectum	One primary only	January	Yes
1868648	1990	Female	76	White	Widowed	Sigmoid Colon	8140/3: Adenocarcinoma, NOS	C18.7-Sigmoid colon	Moderately differentiated; Grade II	20	Blank(s)	Blank(s)	T4	Blank(s)	Blank(s)	N0	Blank(s)	Blank(s)	Blank(s)	Blank(s)	Blank(s)	Blank(s)	Blank(s)	Blank(s)	Blank(s)	Blank(s)	6	0	Blank(s)	No radiation and/or cancer-directed surgery	None	Alive or dead of other cause	Dead (attributable to causes other than this cancer dx)	92	Other Cause of Death	One primary only	April	No/Unknown
1868865	1988	Male	39	White	Divorced	Ascending Colon	8140/3: Adenocarcinoma, NOS	C18.2-Ascending colon	Moderately differentiated; Grade II	20	Blank(s)	Blank(s)	T3	Blank(s)	Blank(s)	N0	Blank(s)	Blank(s)	Blank(s)	Blank(s)	Blank(s)	Blank(s)	Blank(s)	Blank(s)	Blank(s)	Blank(s)	3	0	Blank(s)	Radiation after surgery	Beam radiation	Dead (attributable to this cancer dx)	Alive or dead due to cancer	46	Colon excluding Rectum	One primary only	April	No/Unknown
1868957	1989	Female	58	White	Married (including common law)	Sigmoid Colon	8140/3: Adenocarcinoma, NOS	C18.7-Sigmoid colon	Moderately differentiated; Grade II	10	Blank(s)	Blank(s)	T2	Blank(s)	Blank(s)	N0	Blank(s)	Blank(s)	Blank(s)	Blank(s)	Blank(s)	Blank(s)	Blank(s)	Blank(s)	Blank(s)	Blank(s)	9	0	Blank(s)	No radiation and/or cancer-directed surgery	None	Alive or dead of other cause	Alive or dead due to cancer	137	Alive	One primary only	July	No/Unknown
1869088	1991	Female	77	White	Divorced	Rectum	8140/3: Adenocarcinoma, NOS	C20.9-Rectum, NOS	Moderately differentiated; Grade II	30	Blank(s)	Blank(s)	T2	Blank(s)	Blank(s)	N1	Blank(s)	Blank(s)	Blank(s)	Blank(s)	Blank(s)	Blank(s)	Blank(s)	Blank(s)	Blank(s)	Blank(s)	11	3	Blank(s)	Radiation after surgery	Beam radiation	Dead (attributable to this cancer dx)	Alive or dead due to cancer	56	Kidney and Renal Pelvis	One primary only	December	Yes
1869100	1990	Female	70	White	Widowed	Rectum	8140/3: Adenocarcinoma, NOS	C20.9-Rectum, NOS	Well differentiated; Grade I	20	Blank(s)	Blank(s)	T3	Blank(s)	Blank(s)	N0	Blank(s)	Blank(s)	Blank(s)	Blank(s)	Blank(s)	Blank(s)	Blank(s)	Blank(s)	Blank(s)	Blank(s)	9	0	Blank(s)	No radiation and/or cancer-directed surgery	None	Alive or dead of other cause	Dead (attributable to causes other than this cancer dx)	181	Diseases of Heart	One primary only	April	No/Unknown
1869141	1989	Male	45	White	Married (including common law)	Rectum	8140/3: Adenocarcinoma, NOS	C20.9-Rectum, NOS	Moderately differentiated; Grade II	20	Blank(s)	Blank(s)	T4	Blank(s)	Blank(s)	N0	Blank(s)	Blank(s)	Blank(s)	Blank(s)	Blank(s)	Blank(s)	Blank(s)	Blank(s)	Blank(s)	Blank(s)	32	0	Blank(s)	No radiation and/or cancer-directed surgery	None	Alive or dead of other cause	Alive or dead due to cancer	291	Alive	One primary only	September	No/Unknown
1869148	1991	Female	59	Asian or Pacific Islander	Separated	Transverse Colon	8140/3: Adenocarcinoma, NOS	C18.4-Transverse colon	Moderately differentiated; Grade II	30	Blank(s)	Blank(s)	T3	Blank(s)	Blank(s)	N1	Blank(s)	Blank(s)	Blank(s)	Blank(s)	Blank(s)	Blank(s)	Blank(s)	Blank(s)	Blank(s)	Blank(s)	2	2	Blank(s)	No radiation and/or cancer-directed surgery	None	Alive or dead of other cause	Alive or dead due to cancer	242	Alive	One primary only	August	Yes
1869164	1990	Male	78	White	Single (never married)	Cecum	8140/3: Adenocarcinoma, NOS	C18.0-Cecum	Moderately differentiated; Grade II	30	Blank(s)	Blank(s)	T3	Blank(s)	Blank(s)	N2	Blank(s)	Blank(s)	Blank(s)	Blank(s)	Blank(s)	Blank(s)	Blank(s)	Blank(s)	Blank(s)	Blank(s)	6	4	Blank(s)	No radiation and/or cancer-directed surgery	None	Dead (attributable to this cancer dx)	Alive or dead due to cancer	18	Miscellaneous Malignant Cancer	One primary only	February	No/Unknown
1869265	1989	Female	68	Black	Widowed	Rectosigmoid Junction	8140/3: Adenocarcinoma, NOS	C19.9-Rectosigmoid junction	Moderately differentiated; Grade II	10	Blank(s)	Blank(s)	T2	Blank(s)	Blank(s)	N0	Blank(s)	Blank(s)	Blank(s)	Blank(s)	Blank(s)	Blank(s)	Blank(s)	Blank(s)	Blank(s)	Blank(s)	3	0	Blank(s)	No radiation and/or cancer-directed surgery	None	Alive or dead of other cause	Alive or dead due to cancer	295	Alive	One primary only	May	No/Unknown
1869355	1990	Male	68	Asian or Pacific Islander	Married (including common law)	Sigmoid Colon	8140/3: Adenocarcinoma, NOS	C18.7-Sigmoid colon	Moderately differentiated; Grade II	20	Blank(s)	Blank(s)	T3	Blank(s)	Blank(s)	N0	Blank(s)	Blank(s)	Blank(s)	Blank(s)	Blank(s)	Blank(s)	Blank(s)	Blank(s)	Blank(s)	Blank(s)	13	0	Blank(s)	No radiation and/or cancer-directed surgery	None	Alive or dead of other cause	Dead (attributable to causes other than this cancer dx)	41	Pneumonia and Influenza	One primary only	September	No/Unknown
1869358	1991	Male	72	Asian or Pacific Islander	Married (including common law)	Sigmoid Colon	8140/3: Adenocarcinoma, NOS	C18.7-Sigmoid colon	Moderately differentiated; Grade II	30	Blank(s)	Blank(s)	T3	Blank(s)	Blank(s)	N1	Blank(s)	Blank(s)	Blank(s)	Blank(s)	Blank(s)	Blank(s)	Blank(s)	Blank(s)	Blank(s)	Blank(s)	8	1	Blank(s)	No radiation and/or cancer-directed surgery	None	Alive or dead of other cause	Dead (attributable to causes other than this cancer dx)	116	Cerebrovascular Diseases	One primary only	October	No/Unknown
1869442	1991	Female	51	White	Married (including common law)	Sigmoid Colon	8140/3: Adenocarcinoma, NOS	C18.7-Sigmoid colon	Moderately differentiated; Grade II	20	Blank(s)	Blank(s)	T3	Blank(s)	Blank(s)	N0	Blank(s)	Blank(s)	Blank(s)	Blank(s)	Blank(s)	Blank(s)	Blank(s)	Blank(s)	Blank(s)	Blank(s)	22	0	Blank(s)	No radiation and/or cancer-directed surgery	None	Dead (attributable to this cancer dx)	Alive or dead due to cancer	121	Colon excluding Rectum	One primary only	December	Yes
1869483	1988	Male	51	White	Single (never married)	Ascending Colon	8140/3: Adenocarcinoma, NOS	C18.2-Ascending colon	Moderately differentiated; Grade II	20	Blank(s)	Blank(s)	T3	Blank(s)	Blank(s)	N0	Blank(s)	Blank(s)	Blank(s)	Blank(s)	Blank(s)	Blank(s)	Blank(s)	Blank(s)	Blank(s)	Blank(s)	21	0	Blank(s)	No radiation and/or cancer-directed surgery	None	Alive or dead of other cause	Alive or dead due to cancer	136	Alive	One primary only	July	No/Unknown
1869609	1990	Male	65	Asian or Pacific Islander	Married (including common law)	Rectum	8140/3: Adenocarcinoma, NOS	C20.9-Rectum, NOS	Moderately differentiated; Grade II	20	Blank(s)	Blank(s)	T3	Blank(s)	Blank(s)	N0	Blank(s)	Blank(s)	Blank(s)	Blank(s)	Blank(s)	Blank(s)	Blank(s)	Blank(s)	Blank(s)	Blank(s)	8	0	Blank(s)	Radiation prior to surgery	Beam radiation	Alive or dead of other cause	Dead (attributable to causes other than this cancer dx)	43	Diseases of Heart	One primary only	June	No/Unknown
1869702	1989	Male	80	White	Married (including common law)	Cecum	8140/3: Adenocarcinoma, NOS	C18.0-Cecum	Moderately differentiated; Grade II	30	Blank(s)	Blank(s)	T4	Blank(s)	Blank(s)	N2	Blank(s)	Blank(s)	Blank(s)	Blank(s)	Blank(s)	Blank(s)	Blank(s)	Blank(s)	Blank(s)	Blank(s)	13	5	Blank(s)	No radiation and/or cancer-directed surgery	None	Dead (attributable to this cancer dx)	Alive or dead due to cancer	51	Colon excluding Rectum	One primary only	June	No/Unknown
1869789	1990	Male	70	Asian or Pacific Islander	Married (including common law)	Sigmoid Colon	8140/3: Adenocarcinoma, NOS	C18.7-Sigmoid colon	Moderately differentiated; Grade II	20	Blank(s)	Blank(s)	T3	Blank(s)	Blank(s)	N0	Blank(s)	Blank(s)	Blank(s)	Blank(s)	Blank(s)	Blank(s)	Blank(s)	Blank(s)	Blank(s)	Blank(s)	14	0	Blank(s)	No radiation and/or cancer-directed surgery	None	Alive or dead of other cause	Dead (attributable to causes other than this cancer dx)	93	State DC not available or state DC available but no COD	One primary only	October	No/Unknown
1869806	1990	Male	56	Black	Married (including common law)	Cecum	8481/3: Mucin-producing adenocarcinoma	C18.0-Cecum	Moderately differentiated; Grade II	20	Blank(s)	Blank(s)	T3	Blank(s)	Blank(s)	N0	Blank(s)	Blank(s)	Blank(s)	Blank(s)	Blank(s)	Blank(s)	Blank(s)	Blank(s)	Blank(s)	Blank(s)	8	0	Blank(s)	No radiation and/or cancer-directed surgery	None	Alive or dead of other cause	Dead (attributable to causes other than this cancer dx)	63	Diseases of Heart	One primary only	November	No/Unknown
1869834	1990	Male	65	White	Married (including common law)	Rectum	8140/3: Adenocarcinoma, NOS	C20.9-Rectum, NOS	Moderately differentiated; Grade II	20	Blank(s)	Blank(s)	T3	Blank(s)	Blank(s)	N0	Blank(s)	Blank(s)	Blank(s)	Blank(s)	Blank(s)	Blank(s)	Blank(s)	Blank(s)	Blank(s)	Blank(s)	4	0	Blank(s)	Radiation prior to surgery	Beam radiation	Dead (attributable to this cancer dx)	Alive or dead due to cancer	117	Pancreas	One primary only	April	Yes
1869874	1988	Female	70	White	Widowed	Rectosigmoid Junction	8140/3: Adenocarcinoma, NOS	C19.9-Rectosigmoid junction	Moderately differentiated; Grade II	20	Blank(s)	Blank(s)	T3	Blank(s)	Blank(s)	N0	Blank(s)	Blank(s)	Blank(s)	Blank(s)	Blank(s)	Blank(s)	Blank(s)	Blank(s)	Blank(s)	Blank(s)	7	0	Blank(s)	Radiation after surgery	Beam radiation	Dead (attributable to this cancer dx)	Alive or dead due to cancer	9	Other Cause of Death	One primary only	April	Yes
1870031	1991	Male	53	Asian or Pacific Islander	Married (including common law)	Sigmoid Colon	8140/3: Adenocarcinoma, NOS	C18.7-Sigmoid colon	Moderately differentiated; Grade II	30	Blank(s)	Blank(s)	T3	Blank(s)	Blank(s)	N1	Blank(s)	Blank(s)	Blank(s)	Blank(s)	Blank(s)	Blank(s)	Blank(s)	Blank(s)	Blank(s)	Blank(s)	18	2	Blank(s)	No radiation and/or cancer-directed surgery	None	Alive or dead of other cause	Alive or dead due to cancer	1	Alive	One primary only	July	No/Unknown
1870277	1990	Female	69	White	Widowed	Rectum	8140/3: Adenocarcinoma, NOS	C20.9-Rectum, NOS	Poorly differentiated; Grade III	10	Blank(s)	Blank(s)	T2	Blank(s)	Blank(s)	N0	Blank(s)	Blank(s)	Blank(s)	Blank(s)	Blank(s)	Blank(s)	Blank(s)	Blank(s)	Blank(s)	Blank(s)	3	0	Blank(s)	No radiation and/or cancer-directed surgery	None	Dead (attributable to this cancer dx)	Alive or dead due to cancer	81	Colon excluding Rectum	One primary only	November	No/Unknown
1870285	1991	Female	60	White	Divorced	Ascending Colon	8140/3: Adenocarcinoma, NOS	C18.2-Ascending colon	Moderately differentiated; Grade II	20	Blank(s)	Blank(s)	T3	Blank(s)	Blank(s)	N0	Blank(s)	Blank(s)	Blank(s)	Blank(s)	Blank(s)	Blank(s)	Blank(s)	Blank(s)	Blank(s)	Blank(s)	17	0	Blank(s)	No radiation and/or cancer-directed surgery	None	Alive or dead of other cause	Alive or dead due to cancer	271	Alive	One primary only	May	No/Unknown
1870578	1990	Male	63	White	Married (including common law)	Hepatic Flexure	8140/3: Adenocarcinoma, NOS	C18.3-Hepatic flexure of colon	Well differentiated; Grade I	10	Blank(s)	Blank(s)	T2	Blank(s)	Blank(s)	N0	Blank(s)	Blank(s)	Blank(s)	Blank(s)	Blank(s)	Blank(s)	Blank(s)	Blank(s)	Blank(s)	Blank(s)	7	0	Blank(s)	No radiation and/or cancer-directed surgery	None	Alive or dead of other cause	Alive or dead due to cancer	285	Alive	One primary only	March	No/Unknown
1870711	1988	Male	61	White	Married (including common law)	Descending Colon	8140/3: Adenocarcinoma, NOS	C18.6-Descending colon	Moderately differentiated; Grade II	20	Blank(s)	Blank(s)	T3	Blank(s)	Blank(s)	N0	Blank(s)	Blank(s)	Blank(s)	Blank(s)	Blank(s)	Blank(s)	Blank(s)	Blank(s)	Blank(s)	Blank(s)	24	0	Blank(s)	No radiation and/or cancer-directed surgery	None	Dead (attributable to this cancer dx)	Alive or dead due to cancer	37	Colon excluding Rectum	One primary only	July	Yes
1870728	1990	Male	70	White	Married (including common law)	Ascending Colon	8140/3: Adenocarcinoma, NOS	C18.2-Ascending colon	Moderately differentiated; Grade II	20	Blank(s)	Blank(s)	T3	Blank(s)	Blank(s)	N0	Blank(s)	Blank(s)	Blank(s)	Blank(s)	Blank(s)	Blank(s)	Blank(s)	Blank(s)	Blank(s)	Blank(s)	16	0	Blank(s)	No radiation and/or cancer-directed surgery	None	Alive or dead of other cause	Dead (attributable to causes other than this cancer dx)	136	Diseases of Heart	One primary only	August	No/Unknown
1870777	1989	Male	79	Black	Single (never married)	Rectosigmoid Junction	8140/3: Adenocarcinoma, NOS	C19.9-Rectosigmoid junction	Poorly differentiated; Grade III	20	Blank(s)	Blank(s)	T3	Blank(s)	Blank(s)	N0	Blank(s)	Blank(s)	Blank(s)	Blank(s)	Blank(s)	Blank(s)	Blank(s)	Blank(s)	Blank(s)	Blank(s)	2	0	Blank(s)	No radiation and/or cancer-directed surgery	None	Alive or dead of other cause	Dead (attributable to causes other than this cancer dx)	49	Diseases of Heart	One primary only	November	No/Unknown
1870926	1990	Male	43	White	Married (including common law)	Rectum	8480/3: Mucinous adenocarcinoma	C20.9-Rectum, NOS	Poorly differentiated; Grade III	30	Blank(s)	Blank(s)	T3	Blank(s)	Blank(s)	N1	Blank(s)	Blank(s)	Blank(s)	Blank(s)	Blank(s)	Blank(s)	Blank(s)	Blank(s)	Blank(s)	Blank(s)	8	2	Blank(s)	Radiation after surgery	Beam radiation	Alive or dead of other cause	Alive or dead due to cancer	286	Alive	One primary only	February	Yes
1870982	1990	Male	51	White	Married (including common law)	Cecum	8140/3: Adenocarcinoma, NOS	C18.0-Cecum	Moderately differentiated; Grade II	20	Blank(s)	Blank(s)	T3	Blank(s)	Blank(s)	N0	Blank(s)	Blank(s)	Blank(s)	Blank(s)	Blank(s)	Blank(s)	Blank(s)	Blank(s)	Blank(s)	Blank(s)	22	0	Blank(s)	No radiation and/or cancer-directed surgery	None	Alive or dead of other cause	Alive or dead due to cancer	285	Alive	One primary only	March	No/Unknown
1871108	1989	Male	71	White	Married (including common law)	Sigmoid Colon	8140/3: Adenocarcinoma, NOS	C18.7-Sigmoid colon	Moderately differentiated; Grade II	20	Blank(s)	Blank(s)	T3	Blank(s)	Blank(s)	N0	Blank(s)	Blank(s)	Blank(s)	Blank(s)	Blank(s)	Blank(s)	Blank(s)	Blank(s)	Blank(s)	Blank(s)	11	0	Blank(s)	No radiation and/or cancer-directed surgery	None	Alive or dead of other cause	Dead (attributable to causes other than this cancer dx)	240	Diseases of Heart	One primary only	June	No/Unknown
1871211	1992	Female	70	White	Widowed	Sigmoid Colon	8140/3: Adenocarcinoma, NOS	C18.7-Sigmoid colon	Moderately differentiated; Grade II	10	Blank(s)	Blank(s)	T2	Blank(s)	Blank(s)	N0	Blank(s)	Blank(s)	Blank(s)	Blank(s)	Blank(s)	Blank(s)	Blank(s)	Blank(s)	Blank(s)	Blank(s)	5	0	Blank(s)	No radiation and/or cancer-directed surgery	None	Alive or dead of other cause	Alive or dead due to cancer	263	Alive	One primary only	January	No/Unknown
1871330	1989	Female	75	White	Married (including common law)	Hepatic Flexure	8140/3: Adenocarcinoma, NOS	C18.3-Hepatic flexure of colon	Moderately differentiated; Grade II	20	Blank(s)	Blank(s)	T3	Blank(s)	Blank(s)	N0	Blank(s)	Blank(s)	Blank(s)	Blank(s)	Blank(s)	Blank(s)	Blank(s)	Blank(s)	Blank(s)	Blank(s)	33	0	Blank(s)	No radiation and/or cancer-directed surgery	None	Alive or dead of other cause	Dead (attributable to causes other than this cancer dx)	62	Diseases of Heart	One primary only	April	No/Unknown
1871423	1988	Male	70	White	Widowed	Sigmoid Colon	8140/3: Adenocarcinoma, NOS	C18.7-Sigmoid colon	Moderately differentiated; Grade II	20	Blank(s)	Blank(s)	T4	Blank(s)	Blank(s)	N0	Blank(s)	Blank(s)	Blank(s)	Blank(s)	Blank(s)	Blank(s)	Blank(s)	Blank(s)	Blank(s)	Blank(s)	98	0	Blank(s)	No radiation and/or cancer-directed surgery	Beam radiation	Dead (attributable to this cancer dx)	Alive or dead due to cancer	11	Rectum and Rectosigmoid Junction	One primary only	July	No/Unknown
1871539	1990	Female	51	Asian or Pacific Islander	Married (including common law)	Sigmoid Colon	8140/3: Adenocarcinoma, NOS	C18.7-Sigmoid colon	Moderately differentiated; Grade II	20	Blank(s)	Blank(s)	T3	Blank(s)	Blank(s)	N0	Blank(s)	Blank(s)	Blank(s)	Blank(s)	Blank(s)	Blank(s)	Blank(s)	Blank(s)	Blank(s)	Blank(s)	15	0	Blank(s)	No radiation and/or cancer-directed surgery	None	Alive or dead of other cause	Dead (attributable to causes other than this cancer dx)	22	State DC not available or state DC available but no COD	One primary only	February	No/Unknown
1871807	1989	Male	47	White	Married (including common law)	Rectum	8140/3: Adenocarcinoma, NOS	C20.9-Rectum, NOS	Poorly differentiated; Grade III	20	Blank(s)	Blank(s)	T3	Blank(s)	Blank(s)	N0	Blank(s)	Blank(s)	Blank(s)	Blank(s)	Blank(s)	Blank(s)	Blank(s)	Blank(s)	Blank(s)	Blank(s)	6	0	Blank(s)	Radiation prior to surgery	Beam radiation	Dead (attributable to this cancer dx)	Alive or dead due to cancer	21	Rectum and Rectosigmoid Junction	One primary only	June	Yes
1871812	1990	Female	62	White	Divorced	Rectum	8140/3: Adenocarcinoma, NOS	C20.9-Rectum, NOS	Moderately differentiated; Grade II	20	Blank(s)	Blank(s)	T4	Blank(s)	Blank(s)	N0	Blank(s)	Blank(s)	Blank(s)	Blank(s)	Blank(s)	Blank(s)	Blank(s)	Blank(s)	Blank(s)	Blank(s)	13	0	Blank(s)	No radiation and/or cancer-directed surgery	None	Dead (attributable to this cancer dx)	Alive or dead due to cancer	186	Colon excluding Rectum	One primary only	October	No/Unknown
1871946	1989	Male	80	White	Married (including common law)	Rectosigmoid Junction	8140/3: Adenocarcinoma, NOS	C19.9-Rectosigmoid junction	Moderately differentiated; Grade II	10	Blank(s)	Blank(s)	T2	Blank(s)	Blank(s)	N0	Blank(s)	Blank(s)	Blank(s)	Blank(s)	Blank(s)	Blank(s)	Blank(s)	Blank(s)	Blank(s)	Blank(s)	2	0	Blank(s)	No radiation and/or cancer-directed surgery	None	Alive or dead of other cause	Dead (attributable to causes other than this cancer dx)	115	Cerebrovascular Diseases	One primary only	July	No/Unknown
1871982	1990	Female	74	White	Widowed	Descending Colon	8140/3: Adenocarcinoma, NOS	C18.6-Descending colon	Poorly differentiated; Grade III	20	Blank(s)	Blank(s)	T3	Blank(s)	Blank(s)	N0	Blank(s)	Blank(s)	Blank(s)	Blank(s)	Blank(s)	Blank(s)	Blank(s)	Blank(s)	Blank(s)	Blank(s)	5	0	Blank(s)	No radiation and/or cancer-directed surgery	None	Alive or dead of other cause	Dead (attributable to causes other than this cancer dx)	230	Cerebrovascular Diseases	One primary only	March	No/Unknown
1872061	1991	Male	41	White	Married (including common law)	Rectum	8140/3: Adenocarcinoma, NOS	C20.9-Rectum, NOS	Poorly differentiated; Grade III	20	Blank(s)	Blank(s)	T3	Blank(s)	Blank(s)	N0	Blank(s)	Blank(s)	Blank(s)	Blank(s)	Blank(s)	Blank(s)	Blank(s)	Blank(s)	Blank(s)	Blank(s)	11	0	Blank(s)	Radiation after surgery	Beam radiation	Dead (attributable to this cancer dx)	Alive or dead due to cancer	60	Colon excluding Rectum	One primary only	April	Yes
1872195	1991	Male	68	White	Married (including common law)	Rectum	8140/3: Adenocarcinoma, NOS	C20.9-Rectum, NOS	Moderately differentiated; Grade II	20	Blank(s)	Blank(s)	T3	Blank(s)	Blank(s)	N0	Blank(s)	Blank(s)	Blank(s)	Blank(s)	Blank(s)	Blank(s)	Blank(s)	Blank(s)	Blank(s)	Blank(s)	1	0	Blank(s)	Radiation after surgery	Beam radiation	Alive or dead of other cause	Dead (attributable to causes other than this cancer dx)	142	Cerebrovascular Diseases	One primary only	October	Yes
1872246	1991	Female	78	White	Widowed	Rectum	8140/3: Adenocarcinoma, NOS	C20.9-Rectum, NOS	Moderately differentiated; Grade II	10	Blank(s)	Blank(s)	T1	Blank(s)	Blank(s)	N0	Blank(s)	Blank(s)	Blank(s)	Blank(s)	Blank(s)	Blank(s)	Blank(s)	Blank(s)	Blank(s)	Blank(s)	11	0	Blank(s)	No radiation and/or cancer-directed surgery	None	Alive or dead of other cause	Dead (attributable to causes other than this cancer dx)	250	Other Cause of Death	One primary only	November	No/Unknown
1872326	1991	Female	71	Black	Widowed	Ascending Colon	8140/3: Adenocarcinoma, NOS	C18.2-Ascending colon	Moderately differentiated; Grade II	20	Blank(s)	Blank(s)	T3	Blank(s)	Blank(s)	N0	Blank(s)	Blank(s)	Blank(s)	Blank(s)	Blank(s)	Blank(s)	Blank(s)	Blank(s)	Blank(s)	Blank(s)	14	0	Blank(s)	No radiation and/or cancer-directed surgery	None	Alive or dead of other cause	Dead (attributable to causes other than this cancer dx)	216	State DC not available or state DC available but no COD	One primary only	November	No/Unknown
1872419	1988	Male	67	White	Divorced	Rectum	8140/3: Adenocarcinoma, NOS	C20.9-Rectum, NOS	Moderately differentiated; Grade II	30	Blank(s)	Blank(s)	T4	Blank(s)	Blank(s)	N2	Blank(s)	Blank(s)	Blank(s)	Blank(s)	Blank(s)	Blank(s)	Blank(s)	Blank(s)	Blank(s)	Blank(s)	7	5	Blank(s)	Radiation after surgery	Beam radiation	Dead (attributable to this cancer dx)	Alive or dead due to cancer	25	Rectum and Rectosigmoid Junction	One primary only	February	Yes
1872450	1989	Male	73	White	Married (including common law)	Sigmoid Colon	8140/3: Adenocarcinoma, NOS	C18.7-Sigmoid colon	Moderately differentiated; Grade II	20	Blank(s)	Blank(s)	T3	Blank(s)	Blank(s)	N0	Blank(s)	Blank(s)	Blank(s)	Blank(s)	Blank(s)	Blank(s)	Blank(s)	Blank(s)	Blank(s)	Blank(s)	10	0	Blank(s)	No radiation and/or cancer-directed surgery	None	Dead (attributable to this cancer dx)	Alive or dead due to cancer	24	Colon excluding Rectum	One primary only	April	No/Unknown
1872497	1989	Male	60	White	Married (including common law)	Rectosigmoid Junction	8140/3: Adenocarcinoma, NOS	C19.9-Rectosigmoid junction	Moderately differentiated; Grade II	30	Blank(s)	Blank(s)	T3	Blank(s)	Blank(s)	N1	Blank(s)	Blank(s)	Blank(s)	Blank(s)	Blank(s)	Blank(s)	Blank(s)	Blank(s)	Blank(s)	Blank(s)	7	2	Blank(s)	Radiation after surgery	Beam radiation	Dead (attributable to this cancer dx)	Alive or dead due to cancer	15	Colon excluding Rectum	One primary only	March	No/Unknown
1872502	1990	Male	75	White	Married (including common law)	Rectum	8140/3: Adenocarcinoma, NOS	C20.9-Rectum, NOS	Moderately differentiated; Grade II	30	Blank(s)	Blank(s)	T2	Blank(s)	Blank(s)	N1	Blank(s)	Blank(s)	Blank(s)	Blank(s)	Blank(s)	Blank(s)	Blank(s)	Blank(s)	Blank(s)	Blank(s)	6	2	Blank(s)	Radiation after surgery	Beam radiation	Alive or dead of other cause	Dead (attributable to causes other than this cancer dx)	255	Pneumonia and Influenza	One primary only	March	Yes
1872558	1988	Male	70	White	Married (including common law)	Transverse Colon	8140/3: Adenocarcinoma, NOS	C18.4-Transverse colon	Moderately differentiated; Grade II	30	Blank(s)	Blank(s)	T3	Blank(s)	Blank(s)	N1	Blank(s)	Blank(s)	Blank(s)	Blank(s)	Blank(s)	Blank(s)	Blank(s)	Blank(s)	Blank(s)	Blank(s)	2	1	Blank(s)	No radiation and/or cancer-directed surgery	None	Dead (attributable to this cancer dx)	Alive or dead due to cancer	42	Colon excluding Rectum	One primary only	October	No/Unknown
1872647	1991	Female	79	White	Widowed	Cecum	8140/3: Adenocarcinoma, NOS	C18.0-Cecum	Moderately differentiated; Grade II	30	Blank(s)	Blank(s)	T3	Blank(s)	Blank(s)	N1	Blank(s)	Blank(s)	Blank(s)	Blank(s)	Blank(s)	Blank(s)	Blank(s)	Blank(s)	Blank(s)	Blank(s)	15	2	Blank(s)	No radiation and/or cancer-directed surgery	None	Alive or dead of other cause	Dead (attributable to causes other than this cancer dx)	206	Diseases of Heart	One primary only	March	Yes
1872648	1990	Female	80	White	Married (including common law)	Cecum	8140/3: Adenocarcinoma, NOS	C18.0-Cecum	Moderately differentiated; Grade II	20	Blank(s)	Blank(s)	T3	Blank(s)	Blank(s)	N0	Blank(s)	Blank(s)	Blank(s)	Blank(s)	Blank(s)	Blank(s)	Blank(s)	Blank(s)	Blank(s)	Blank(s)	5	0	Blank(s)	No radiation and/or cancer-directed surgery	None	Alive or dead of other cause	Dead (attributable to causes other than this cancer dx)	179	Cerebrovascular Diseases	One primary only	April	No/Unknown
1872694	1991	Male	69	White	Married (including common law)	Cecum	8140/3: Adenocarcinoma, NOS	C18.0-Cecum	Poorly differentiated; Grade III	30	Blank(s)	Blank(s)	T3	Blank(s)	Blank(s)	N3	Blank(s)	Blank(s)	Blank(s)	Blank(s)	Blank(s)	Blank(s)	Blank(s)	Blank(s)	Blank(s)	Blank(s)	19	6	Blank(s)	No radiation and/or cancer-directed surgery	None	Alive or dead of other cause	Dead (attributable to causes other than this cancer dx)	62	Other Cause of Death	One primary only	August	Yes
1872816	1990	Female	75	White	Married (including common law)	Ascending Colon	8140/3: Adenocarcinoma, NOS	C18.2-Ascending colon	Moderately differentiated; Grade II	20	Blank(s)	Blank(s)	T3	Blank(s)	Blank(s)	N0	Blank(s)	Blank(s)	Blank(s)	Blank(s)	Blank(s)	Blank(s)	Blank(s)	Blank(s)	Blank(s)	Blank(s)	5	0	Blank(s)	No radiation and/or cancer-directed surgery	None	Alive or dead of other cause	Dead (attributable to causes other than this cancer dx)	55	Diseases of Heart	One primary only	October	No/Unknown
1873103	1989	Male	72	Black	Married (including common law)	Sigmoid Colon	8140/3: Adenocarcinoma, NOS	C18.7-Sigmoid colon	Poorly differentiated; Grade III	30	Blank(s)	Blank(s)	T3	Blank(s)	Blank(s)	N2	Blank(s)	Blank(s)	Blank(s)	Blank(s)	Blank(s)	Blank(s)	Blank(s)	Blank(s)	Blank(s)	Blank(s)	8	4	Blank(s)	No radiation and/or cancer-directed surgery	None	Alive or dead of other cause	Dead (attributable to causes other than this cancer dx)	92	Diseases of Heart	One primary only	March	No/Unknown
1873233	1991	Male	42	White	Married (including common law)	Rectosigmoid Junction	8140/3: Adenocarcinoma, NOS	C19.9-Rectosigmoid junction	Moderately differentiated; Grade II	20	Blank(s)	Blank(s)	T3	Blank(s)	Blank(s)	N0	Blank(s)	Blank(s)	Blank(s)	Blank(s)	Blank(s)	Blank(s)	Blank(s)	Blank(s)	Blank(s)	Blank(s)	2	0	Blank(s)	Radiation after surgery	Beam radiation	Alive or dead of other cause	Alive or dead due to cancer	270	Alive	One primary only	June	Yes
1873234	1988	Female	56	White	Married (including common law)	Sigmoid Colon	8140/3: Adenocarcinoma, NOS	C18.7-Sigmoid colon	Well differentiated; Grade I	30	Blank(s)	Blank(s)	T4	Blank(s)	Blank(s)	N2	Blank(s)	Blank(s)	Blank(s)	Blank(s)	Blank(s)	Blank(s)	Blank(s)	Blank(s)	Blank(s)	Blank(s)	13	7	Blank(s)	No radiation and/or cancer-directed surgery	None	Dead (attributable to this cancer dx)	Alive or dead due to cancer	13	Colon excluding Rectum	One primary only	July	No/Unknown
1873286	1989	Female	73	Asian or Pacific Islander	Widowed	Descending Colon	8140/3: Adenocarcinoma, NOS	C18.6-Descending colon	Moderately differentiated; Grade II	20	Blank(s)	Blank(s)	T3	Blank(s)	Blank(s)	N0	Blank(s)	Blank(s)	Blank(s)	Blank(s)	Blank(s)	Blank(s)	Blank(s)	Blank(s)	Blank(s)	Blank(s)	35	0	Blank(s)	No radiation and/or cancer-directed surgery	None	Alive or dead of other cause	Dead (attributable to causes other than this cancer dx)	164	Other Cause of Death	One primary only	September	No/Unknown
1873439	1990	Female	61	White	Widowed	Ascending Colon	8140/3: Adenocarcinoma, NOS	C18.2-Ascending colon	Poorly differentiated; Grade III	20	Blank(s)	Blank(s)	T3	Blank(s)	Blank(s)	N0	Blank(s)	Blank(s)	Blank(s)	Blank(s)	Blank(s)	Blank(s)	Blank(s)	Blank(s)	Blank(s)	Blank(s)	18	0	Blank(s)	No radiation and/or cancer-directed surgery	None	Alive or dead of other cause	Dead (attributable to causes other than this cancer dx)	260	Chronic Obstructive Pulmonary Disease and Allied Cond	One primary only	February	No/Unknown
1873441	1988	Female	62	Asian or Pacific Islander	Widowed	Sigmoid Colon	8140/3: Adenocarcinoma, NOS	C18.7-Sigmoid colon	Moderately differentiated; Grade II	20	Blank(s)	Blank(s)	T4	Blank(s)	Blank(s)	N0	Blank(s)	Blank(s)	Blank(s)	Blank(s)	Blank(s)	Blank(s)	Blank(s)	Blank(s)	Blank(s)	Blank(s)	3	0	Blank(s)	No radiation and/or cancer-directed surgery	None	Dead (attributable to this cancer dx)	Alive or dead due to cancer	29	Colon excluding Rectum	One primary only	December	No/Unknown
1873537	1991	Male	69	Asian or Pacific Islander	Married (including common law)	Rectum	8140/3: Adenocarcinoma, NOS	C20.9-Rectum, NOS	Moderately differentiated; Grade II	20	Blank(s)	Blank(s)	T3	Blank(s)	Blank(s)	N0	Blank(s)	Blank(s)	Blank(s)	Blank(s)	Blank(s)	Blank(s)	Blank(s)	Blank(s)	Blank(s)	Blank(s)	7	0	Blank(s)	Radiation after surgery	Beam radiation	Dead (attributable to this cancer dx)	Alive or dead due to cancer	50	Rectum and Rectosigmoid Junction	One primary only	July	Yes
1873560	1989	Male	68	White	Married (including common law)	Rectum	8140/3: Adenocarcinoma, NOS	C20.9-Rectum, NOS	Moderately differentiated; Grade II	30	Blank(s)	Blank(s)	T3	Blank(s)	Blank(s)	N1	Blank(s)	Blank(s)	Blank(s)	Blank(s)	Blank(s)	Blank(s)	Blank(s)	Blank(s)	Blank(s)	Blank(s)	11	2	Blank(s)	Radiation after surgery	Beam radiation	Alive or dead of other cause	Alive or dead due to cancer	288	Alive	One primary only	December	Yes
1873565	1990	Male	46	White	Single (never married)	Sigmoid Colon	8140/3: Adenocarcinoma, NOS	C18.7-Sigmoid colon	Moderately differentiated; Grade II	20	Blank(s)	Blank(s)	T4	Blank(s)	Blank(s)	N0	Blank(s)	Blank(s)	Blank(s)	Blank(s)	Blank(s)	Blank(s)	Blank(s)	Blank(s)	Blank(s)	Blank(s)	12	0	Blank(s)	No radiation and/or cancer-directed surgery	None	Dead (attributable to this cancer dx)	Alive or dead due to cancer	138	Colon excluding Rectum	One primary only	November	No/Unknown
1873793	1990	Female	45	White	Divorced	Sigmoid Colon	8140/3: Adenocarcinoma, NOS	C18.7-Sigmoid colon	Moderately differentiated; Grade II	20	Blank(s)	Blank(s)	T3	Blank(s)	Blank(s)	N0	Blank(s)	Blank(s)	Blank(s)	Blank(s)	Blank(s)	Blank(s)	Blank(s)	Blank(s)	Blank(s)	Blank(s)	16	0	Blank(s)	No radiation and/or cancer-directed surgery	None	Alive or dead of other cause	Alive or dead due to cancer	278	Alive	One primary only	October	Yes
1873819	1989	Female	59	White	Married (including common law)	Transverse Colon	8140/3: Adenocarcinoma, NOS	C18.4-Transverse colon	Well differentiated; Grade I	20	Blank(s)	Blank(s)	T3	Blank(s)	Blank(s)	N0	Blank(s)	Blank(s)	Blank(s)	Blank(s)	Blank(s)	Blank(s)	Blank(s)	Blank(s)	Blank(s)	Blank(s)	14	0	Blank(s)	No radiation and/or cancer-directed surgery	None	Alive or dead of other cause	Dead (attributable to causes other than this cancer dx)	286	Alzheimers (ICD-9 and 10 only)	One primary only	October	No/Unknown
1873861	1988	Female	76	Asian or Pacific Islander	Married (including common law)	Hepatic Flexure	8480/3: Mucinous adenocarcinoma	C18.3-Hepatic flexure of colon	Moderately differentiated; Grade II	30	Blank(s)	Blank(s)	T3	Blank(s)	Blank(s)	N1	Blank(s)	Blank(s)	Blank(s)	Blank(s)	Blank(s)	Blank(s)	Blank(s)	Blank(s)	Blank(s)	Blank(s)	6	3	Blank(s)	No radiation and/or cancer-directed surgery	None	Alive or dead of other cause	Dead (attributable to causes other than this cancer dx)	6	Cerebrovascular Diseases	One primary only	February	No/Unknown
1873984	1990	Male	62	White	Married (including common law)	Rectum	8140/3: Adenocarcinoma, NOS	C20.9-Rectum, NOS	Moderately differentiated; Grade II	30	Blank(s)	Blank(s)	T2	Blank(s)	Blank(s)	N1	Blank(s)	Blank(s)	Blank(s)	Blank(s)	Blank(s)	Blank(s)	Blank(s)	Blank(s)	Blank(s)	Blank(s)	1	1	Blank(s)	Radiation after surgery	Beam radiation	Alive or dead of other cause	Alive or dead due to cancer	287	Alive	One primary only	January	Yes
1874160	1989	Female	77	White	Widowed	Rectosigmoid Junction	8140/3: Adenocarcinoma, NOS	C19.9-Rectosigmoid junction	Moderately differentiated; Grade II	10	Blank(s)	Blank(s)	T2	Blank(s)	Blank(s)	N0	Blank(s)	Blank(s)	Blank(s)	Blank(s)	Blank(s)	Blank(s)	Blank(s)	Blank(s)	Blank(s)	Blank(s)	20	0	Blank(s)	No radiation and/or cancer-directed surgery	None	Dead (attributable to this cancer dx)	Alive or dead due to cancer	91	Other Cause of Death	One primary only	June	No/Unknown
1874566	1990	Male	75	White	Unknown	Cecum	8480/3: Mucinous adenocarcinoma	C18.0-Cecum	Moderately differentiated; Grade II	20	Blank(s)	Blank(s)	T3	Blank(s)	Blank(s)	N0	Blank(s)	Blank(s)	Blank(s)	Blank(s)	Blank(s)	Blank(s)	Blank(s)	Blank(s)	Blank(s)	Blank(s)	11	0	Blank(s)	No radiation and/or cancer-directed surgery	None	Alive or dead of other cause	Dead (attributable to causes other than this cancer dx)	35	Diseases of Heart	One primary only	May	No/Unknown
1874779	1992	Male	36	Asian or Pacific Islander	Single (never married)	Sigmoid Colon	8140/3: Adenocarcinoma, NOS	C18.7-Sigmoid colon	Moderately differentiated; Grade II	10	Blank(s)	Blank(s)	T1	Blank(s)	Blank(s)	N0	Blank(s)	Blank(s)	Blank(s)	Blank(s)	Blank(s)	Blank(s)	Blank(s)	Blank(s)	Blank(s)	Blank(s)	6	0	Blank(s)	No radiation and/or cancer-directed surgery	None	Alive or dead of other cause	Alive or dead due to cancer	261	Alive	One primary only	March	No/Unknown
1874881	1991	Male	60	White	Married (including common law)	Rectosigmoid Junction	8140/3: Adenocarcinoma, NOS	C19.9-Rectosigmoid junction	Moderately differentiated; Grade II	10	Blank(s)	Blank(s)	T2	Blank(s)	Blank(s)	N0	Blank(s)	Blank(s)	Blank(s)	Blank(s)	Blank(s)	Blank(s)	Blank(s)	Blank(s)	Blank(s)	Blank(s)	0	98	Blank(s)	Radiation after surgery	Beam radiation	Dead (attributable to this cancer dx)	Alive or dead due to cancer	50	Colon excluding Rectum	One primary only	August	No/Unknown
1874902	1991	Female	71	White	Married (including common law)	Transverse Colon	8140/3: Adenocarcinoma, NOS	C18.4-Transverse colon	Moderately differentiated; Grade II	20	Blank(s)	Blank(s)	T3	Blank(s)	Blank(s)	N0	Blank(s)	Blank(s)	Blank(s)	Blank(s)	Blank(s)	Blank(s)	Blank(s)	Blank(s)	Blank(s)	Blank(s)	7	0	Blank(s)	No radiation and/or cancer-directed surgery	None	Alive or dead of other cause	Dead (attributable to causes other than this cancer dx)	205	Other Cause of Death	One primary only	August	No/Unknown
1874912	1989	Male	66	White	Married (including common law)	Sigmoid Colon	8140/3: Adenocarcinoma, NOS	C18.7-Sigmoid colon	Poorly differentiated; Grade III	30	Blank(s)	Blank(s)	T4	Blank(s)	Blank(s)	N1	Blank(s)	Blank(s)	Blank(s)	Blank(s)	Blank(s)	Blank(s)	Blank(s)	Blank(s)	Blank(s)	Blank(s)	9	1	Blank(s)	No radiation and/or cancer-directed surgery	None	Dead (attributable to this cancer dx)	Alive or dead due to cancer	52	Colon excluding Rectum	One primary only	December	No/Unknown
1875019	1990	Female	76	White	Widowed	Sigmoid Colon	8140/3: Adenocarcinoma, NOS	C18.7-Sigmoid colon	Moderately differentiated; Grade II	20	Blank(s)	Blank(s)	T3	Blank(s)	Blank(s)	N0	Blank(s)	Blank(s)	Blank(s)	Blank(s)	Blank(s)	Blank(s)	Blank(s)	Blank(s)	Blank(s)	Blank(s)	0	98	Blank(s)	No radiation and/or cancer-directed surgery	None	Dead (attributable to this cancer dx)	Alive or dead due to cancer	113	Colon excluding Rectum	One primary only	October	No/Unknown
1875526	1990	Female	54	White	Married (including common law)	Descending Colon	8140/3: Adenocarcinoma, NOS	C18.6-Descending colon	Poorly differentiated; Grade III	10	Blank(s)	Blank(s)	T2	Blank(s)	Blank(s)	N0	Blank(s)	Blank(s)	Blank(s)	Blank(s)	Blank(s)	Blank(s)	Blank(s)	Blank(s)	Blank(s)	Blank(s)	1	0	Blank(s)	No radiation and/or cancer-directed surgery	None	Alive or dead of other cause	Alive or dead due to cancer	277	Alive	One primary only	November	No/Unknown
1875681	1988	Female	63	Asian or Pacific Islander	Married (including common law)	Cecum	8140/3: Adenocarcinoma, NOS	C18.0-Cecum	Poorly differentiated; Grade III	30	Blank(s)	Blank(s)	T3	Blank(s)	Blank(s)	N3	Blank(s)	Blank(s)	Blank(s)	Blank(s)	Blank(s)	Blank(s)	Blank(s)	Blank(s)	Blank(s)	Blank(s)	14	4	Blank(s)	No radiation and/or cancer-directed surgery	None	Alive or dead of other cause	Alive or dead due to cancer	16	Alive	One primary only	March	No/Unknown
1876016	1990	Male	66	White	Married (including common law)	Rectum	8140/3: Adenocarcinoma, NOS	C20.9-Rectum, NOS	Moderately differentiated; Grade II	10	Blank(s)	Blank(s)	T1	Blank(s)	Blank(s)	N0	Blank(s)	Blank(s)	Blank(s)	Blank(s)	Blank(s)	Blank(s)	Blank(s)	Blank(s)	Blank(s)	Blank(s)	2	0	Blank(s)	Radiation before and after surgery	Beam radiation	Alive or dead of other cause	Dead (attributable to causes other than this cancer dx)	153	Diabetes Mellitus	One primary only	January	Yes
1876051	1990	Male	51	Asian or Pacific Islander	Married (including common law)	Rectum	8140/3: Adenocarcinoma, NOS	C20.9-Rectum, NOS	Poorly differentiated; Grade III	30	Blank(s)	Blank(s)	T3	Blank(s)	Blank(s)	N2	Blank(s)	Blank(s)	Blank(s)	Blank(s)	Blank(s)	Blank(s)	Blank(s)	Blank(s)	Blank(s)	Blank(s)	6	4	Blank(s)	Radiation after surgery	Beam radiation	Alive or dead of other cause	Dead (attributable to causes other than this cancer dx)	84	State DC not available or state DC available but no COD	One primary only	February	Yes
1876067	1992	Male	80	Asian or Pacific Islander	Married (including common law)	Sigmoid Colon	8140/3: Adenocarcinoma, NOS	C18.7-Sigmoid colon	Moderately differentiated; Grade II	20	Blank(s)	Blank(s)	T3	Blank(s)	Blank(s)	N0	Blank(s)	Blank(s)	Blank(s)	Blank(s)	Blank(s)	Blank(s)	Blank(s)	Blank(s)	Blank(s)	Blank(s)	9	0	Blank(s)	No radiation and/or cancer-directed surgery	None	Alive or dead of other cause	Dead (attributable to causes other than this cancer dx)	21	Septicemia	One primary only	March	No/Unknown
1876132	1992	Female	78	White	Widowed	Rectosigmoid Junction	8140/3: Adenocarcinoma, NOS	C19.9-Rectosigmoid junction	Moderately differentiated; Grade II	10	Blank(s)	Blank(s)	T2	Blank(s)	Blank(s)	N0	Blank(s)	Blank(s)	Blank(s)	Blank(s)	Blank(s)	Blank(s)	Blank(s)	Blank(s)	Blank(s)	Blank(s)	98	0	Blank(s)	No radiation and/or cancer-directed surgery	None	Alive or dead of other cause	Dead (attributable to causes other than this cancer dx)	124	Chronic Obstructive Pulmonary Disease and Allied Cond	One primary only	March	No/Unknown
1876150	1990	Male	55	White	Unknown	Rectum	8140/3: Adenocarcinoma, NOS	C20.9-Rectum, NOS	Moderately differentiated; Grade II	10	Blank(s)	Blank(s)	T2	Blank(s)	Blank(s)	N0	Blank(s)	Blank(s)	Blank(s)	Blank(s)	Blank(s)	Blank(s)	Blank(s)	Blank(s)	Blank(s)	Blank(s)	0	98	Blank(s)	No radiation and/or cancer-directed surgery	None	Alive or dead of other cause	Dead (attributable to causes other than this cancer dx)	224	Diseases of Heart	One primary only	June	No/Unknown
1876189	1991	Female	47	White	Married (including common law)	Splenic Flexure	8140/3: Adenocarcinoma, NOS	C18.5-Splenic flexure of colon	Moderately differentiated; Grade II	20	Blank(s)	Blank(s)	T3	Blank(s)	Blank(s)	N0	Blank(s)	Blank(s)	Blank(s)	Blank(s)	Blank(s)	Blank(s)	Blank(s)	Blank(s)	Blank(s)	Blank(s)	9	0	Blank(s)	No radiation and/or cancer-directed surgery	None	Alive or dead of other cause	Dead (attributable to causes other than this cancer dx)	249	Diseases of Heart	One primary only	June	Yes
1876409	1988	Female	76	White	Widowed	Sigmoid Colon	8140/3: Adenocarcinoma, NOS	C18.7-Sigmoid colon	Moderately differentiated; Grade II	20	Blank(s)	Blank(s)	T3	Blank(s)	Blank(s)	N0	Blank(s)	Blank(s)	Blank(s)	Blank(s)	Blank(s)	Blank(s)	Blank(s)	Blank(s)	Blank(s)	Blank(s)	4	0	Blank(s)	No radiation and/or cancer-directed surgery	None	Alive or dead of other cause	Dead (attributable to causes other than this cancer dx)	168	Atherosclerosis	One primary only	September	No/Unknown
1876500	1988	Male	68	White	Married (including common law)	Sigmoid Colon	8140/3: Adenocarcinoma, NOS	C18.7-Sigmoid colon	Moderately differentiated; Grade II	30	Blank(s)	Blank(s)	T3	Blank(s)	Blank(s)	N1	Blank(s)	Blank(s)	Blank(s)	Blank(s)	Blank(s)	Blank(s)	Blank(s)	Blank(s)	Blank(s)	Blank(s)	4	2	Blank(s)	No radiation and/or cancer-directed surgery	None	Dead (attributable to this cancer dx)	Alive or dead due to cancer	73	Colon excluding Rectum	One primary only	June	No/Unknown
1876608	1992	Male	39	Asian or Pacific Islander	Married (including common law)	Rectum	8140/3: Adenocarcinoma, NOS	C20.9-Rectum, NOS	Moderately differentiated; Grade II	20	Blank(s)	Blank(s)	T3	Blank(s)	Blank(s)	N0	Blank(s)	Blank(s)	Blank(s)	Blank(s)	Blank(s)	Blank(s)	Blank(s)	Blank(s)	Blank(s)	Blank(s)	11	0	Blank(s)	Radiation after surgery	Beam radiation	Alive or dead of other cause	Dead (attributable to causes other than this cancer dx)	71	State DC not available or state DC available but no COD	One primary only	March	No/Unknown
1876639	1991	Male	69	White	Single (never married)	Sigmoid Colon	8140/3: Adenocarcinoma, NOS	C18.7-Sigmoid colon	Poorly differentiated; Grade III	10	Blank(s)	Blank(s)	T2	Blank(s)	Blank(s)	N0	Blank(s)	Blank(s)	Blank(s)	Blank(s)	Blank(s)	Blank(s)	Blank(s)	Blank(s)	Blank(s)	Blank(s)	9	0	Blank(s)	No radiation and/or cancer-directed surgery	None	Alive or dead of other cause	Dead (attributable to causes other than this cancer dx)	6	Other Cause of Death	One primary only	August	No/Unknown
1876699	1990	Male	65	White	Married (including common law)	Descending Colon	8140/3: Adenocarcinoma, NOS	C18.6-Descending colon	Moderately differentiated; Grade II	10	Blank(s)	Blank(s)	T2	Blank(s)	Blank(s)	N0	Blank(s)	Blank(s)	Blank(s)	Blank(s)	Blank(s)	Blank(s)	Blank(s)	Blank(s)	Blank(s)	Blank(s)	6	0	Blank(s)	No radiation and/or cancer-directed surgery	None	Dead (attributable to this cancer dx)	Alive or dead due to cancer	74	Colon excluding Rectum	One primary only	October	No/Unknown
1876867	1991	Female	63	White	Married (including common law)	Cecum	8481/3: Mucin-producing adenocarcinoma	C18.0-Cecum	Moderately differentiated; Grade II	10	Blank(s)	Blank(s)	T2	Blank(s)	Blank(s)	N0	Blank(s)	Blank(s)	Blank(s)	Blank(s)	Blank(s)	Blank(s)	Blank(s)	Blank(s)	Blank(s)	Blank(s)	0	98	Blank(s)	No radiation and/or cancer-directed surgery	None	Alive or dead of other cause	Alive or dead due to cancer	270	Alive	One primary only	June	No/Unknown
1876934	1991	Male	62	White	Married (including common law)	Rectum	8140/3: Adenocarcinoma, NOS	C20.9-Rectum, NOS	Poorly differentiated; Grade III	30	Blank(s)	Blank(s)	T4	Blank(s)	Blank(s)	N1	Blank(s)	Blank(s)	Blank(s)	Blank(s)	Blank(s)	Blank(s)	Blank(s)	Blank(s)	Blank(s)	Blank(s)	3	1	Blank(s)	Radiation after surgery	Beam radiation	Alive or dead of other cause	Dead (attributable to causes other than this cancer dx)	139	Cerebrovascular Diseases	One primary only	August	Yes
1876946	1991	Female	66	White	Married (including common law)	Sigmoid Colon	8140/3: Adenocarcinoma, NOS	C18.7-Sigmoid colon	Poorly differentiated; Grade III	20	Blank(s)	Blank(s)	T3	Blank(s)	Blank(s)	N0	Blank(s)	Blank(s)	Blank(s)	Blank(s)	Blank(s)	Blank(s)	Blank(s)	Blank(s)	Blank(s)	Blank(s)	2	0	Blank(s)	No radiation and/or cancer-directed surgery	None	Alive or dead of other cause	Dead (attributable to causes other than this cancer dx)	122	Diseases of Heart	One primary only	October	Yes
1877003	1991	Male	63	White	Single (never married)	Rectum	8140/3: Adenocarcinoma, NOS	C20.9-Rectum, NOS	Moderately differentiated; Grade II	20	Blank(s)	Blank(s)	T3	Blank(s)	Blank(s)	N0	Blank(s)	Blank(s)	Blank(s)	Blank(s)	Blank(s)	Blank(s)	Blank(s)	Blank(s)	Blank(s)	Blank(s)	5	0	Blank(s)	Radiation after surgery	Beam radiation	Alive or dead of other cause	Alive or dead due to cancer	268	Alive	One primary only	August	No/Unknown
1877045	1988	Male	76	White	Married (including common law)	Rectum	8140/3: Adenocarcinoma, NOS	C20.9-Rectum, NOS	Moderately differentiated; Grade II	30	Blank(s)	Blank(s)	T3	Blank(s)	Blank(s)	N1	Blank(s)	Blank(s)	Blank(s)	Blank(s)	Blank(s)	Blank(s)	Blank(s)	Blank(s)	Blank(s)	Blank(s)	11	2	Blank(s)	Radiation after surgery	Beam radiation	Alive or dead of other cause	Dead (attributable to causes other than this cancer dx)	46	Pneumonia and Influenza	One primary only	January	No/Unknown
1877090	1991	Female	57	White	Married (including common law)	Cecum	8140/3: Adenocarcinoma, NOS	C18.0-Cecum	Moderately differentiated; Grade II	10	Blank(s)	Blank(s)	T2	Blank(s)	Blank(s)	N0	Blank(s)	Blank(s)	Blank(s)	Blank(s)	Blank(s)	Blank(s)	Blank(s)	Blank(s)	Blank(s)	Blank(s)	17	0	Blank(s)	No radiation and/or cancer-directed surgery	None	Alive or dead of other cause	Alive or dead due to cancer	268	Alive	One primary only	August	No/Unknown
1877092	1988	Female	80	White	Widowed	Rectum	8140/3: Adenocarcinoma, NOS	C20.9-Rectum, NOS	Moderately differentiated; Grade II	10	Blank(s)	Blank(s)	T2	Blank(s)	Blank(s)	N0	Blank(s)	Blank(s)	Blank(s)	Blank(s)	Blank(s)	Blank(s)	Blank(s)	Blank(s)	Blank(s)	Blank(s)	16	0	Blank(s)	No radiation and/or cancer-directed surgery	None	Dead (attributable to this cancer dx)	Alive or dead due to cancer	62	Colon excluding Rectum	One primary only	May	No/Unknown
1877125	1991	Male	65	Asian or Pacific Islander	Married (including common law)	Rectum	8140/3: Adenocarcinoma, NOS	C20.9-Rectum, NOS	Moderately differentiated; Grade II	10	Blank(s)	Blank(s)	T2	Blank(s)	Blank(s)	N0	Blank(s)	Blank(s)	Blank(s)	Blank(s)	Blank(s)	Blank(s)	Blank(s)	Blank(s)	Blank(s)	Blank(s)	8	0	Blank(s)	No radiation and/or cancer-directed surgery	None	Alive or dead of other cause	Alive or dead due to cancer	264	Alive	One primary only	December	No/Unknown
1877357	1991	Female	70	White	Divorced	Cecum	8140/3: Adenocarcinoma, NOS	C18.0-Cecum	Moderately differentiated; Grade II	30	Blank(s)	Blank(s)	T4	Blank(s)	Blank(s)	N3	Blank(s)	Blank(s)	Blank(s)	Blank(s)	Blank(s)	Blank(s)	Blank(s)	Blank(s)	Blank(s)	Blank(s)	6	2	Blank(s)	No radiation and/or cancer-directed surgery	None	Alive or dead of other cause	Dead (attributable to causes other than this cancer dx)	97	Diseases of Heart	One primary only	December	Yes
1877367	1988	Female	46	White	Single (never married)	Sigmoid Colon	8140/3: Adenocarcinoma, NOS	C18.7-Sigmoid colon	Moderately differentiated; Grade II	20	Blank(s)	Blank(s)	T3	Blank(s)	Blank(s)	N0	Blank(s)	Blank(s)	Blank(s)	Blank(s)	Blank(s)	Blank(s)	Blank(s)	Blank(s)	Blank(s)	Blank(s)	14	0	Blank(s)	No radiation and/or cancer-directed surgery	None	Dead (attributable to this cancer dx)	Alive or dead due to cancer	73	Colon excluding Rectum	One primary only	June	No/Unknown
1877459	1988	Female	75	White	Widowed	Descending Colon	8140/3: Adenocarcinoma, NOS	C18.6-Descending colon	Well differentiated; Grade I	20	Blank(s)	Blank(s)	T4	Blank(s)	Blank(s)	N0	Blank(s)	Blank(s)	Blank(s)	Blank(s)	Blank(s)	Blank(s)	Blank(s)	Blank(s)	Blank(s)	Blank(s)	11	0	Blank(s)	No radiation and/or cancer-directed surgery	None	Dead (attributable to this cancer dx)	Alive or dead due to cancer	37	Colon excluding Rectum	One primary only	May	No/Unknown
1877478	1991	Male	76	White	Married (including common law)	Splenic Flexure	8140/3: Adenocarcinoma, NOS	C18.5-Splenic flexure of colon	Moderately differentiated; Grade II	20	Blank(s)	Blank(s)	T4	Blank(s)	Blank(s)	N0	Blank(s)	Blank(s)	Blank(s)	Blank(s)	Blank(s)	Blank(s)	Blank(s)	Blank(s)	Blank(s)	Blank(s)	4	0	Blank(s)	No radiation and/or cancer-directed surgery	None	Alive or dead of other cause	Dead (attributable to causes other than this cancer dx)	61	Diseases of Heart	One primary only	December	No/Unknown
1877525	1990	Female	75	Asian or Pacific Islander	Married (including common law)	Rectum	8140/3: Adenocarcinoma, NOS	C20.9-Rectum, NOS	Moderately differentiated; Grade II	10	Blank(s)	Blank(s)	T2	Blank(s)	Blank(s)	N0	Blank(s)	Blank(s)	Blank(s)	Blank(s)	Blank(s)	Blank(s)	Blank(s)	Blank(s)	Blank(s)	Blank(s)	7	0	Blank(s)	No radiation and/or cancer-directed surgery	None	Alive or dead of other cause	Dead (attributable to causes other than this cancer dx)	171	Cerebrovascular Diseases	One primary only	December	No/Unknown
1877661	1992	Male	62	Asian or Pacific Islander	Married (including common law)	Splenic Flexure	8480/3: Mucinous adenocarcinoma	C18.5-Splenic flexure of colon	Well differentiated; Grade I	20	Blank(s)	Blank(s)	T3	Blank(s)	Blank(s)	N0	Blank(s)	Blank(s)	Blank(s)	Blank(s)	Blank(s)	Blank(s)	Blank(s)	Blank(s)	Blank(s)	Blank(s)	9	0	Blank(s)	No radiation and/or cancer-directed surgery	None	Alive or dead of other cause	Dead (attributable to causes other than this cancer dx)	246	Other Cause of Death	One primary only	January	No/Unknown
1877735	1991	Male	66	White	Divorced	Cecum	8481/3: Mucin-producing adenocarcinoma	C18.0-Cecum	Poorly differentiated; Grade III	30	Blank(s)	Blank(s)	T3	Blank(s)	Blank(s)	N3	Blank(s)	Blank(s)	Blank(s)	Blank(s)	Blank(s)	Blank(s)	Blank(s)	Blank(s)	Blank(s)	Blank(s)	8	6	Blank(s)	No radiation and/or cancer-directed surgery	None	Dead (attributable to this cancer dx)	Alive or dead due to cancer	12	Colon excluding Rectum	One primary only	September	Yes
1877785	1988	Female	77	White	Single (never married)	Sigmoid Colon	8140/3: Adenocarcinoma, NOS	C18.7-Sigmoid colon	Moderately differentiated; Grade II	30	Blank(s)	Blank(s)	T3	Blank(s)	Blank(s)	N2	Blank(s)	Blank(s)	Blank(s)	Blank(s)	Blank(s)	Blank(s)	Blank(s)	Blank(s)	Blank(s)	Blank(s)	98	7	Blank(s)	No radiation and/or cancer-directed surgery	None	Dead (attributable to this cancer dx)	Alive or dead due to cancer	29	Colon excluding Rectum	One primary only	October	No/Unknown
1877819	1992	Female	72	Asian or Pacific Islander	Widowed	Rectum	8140/3: Adenocarcinoma, NOS	C20.9-Rectum, NOS	Moderately differentiated; Grade II	20	Blank(s)	Blank(s)	T3	Blank(s)	Blank(s)	N0	Blank(s)	Blank(s)	Blank(s)	Blank(s)	Blank(s)	Blank(s)	Blank(s)	Blank(s)	Blank(s)	Blank(s)	19	0	Blank(s)	No radiation and/or cancer-directed surgery	None	Alive or dead of other cause	Alive or dead due to cancer	30	Alive	One primary only	February	No/Unknown
1877851	1991	Female	74	White	Married (including common law)	Rectosigmoid Junction	8140/3: Adenocarcinoma, NOS	C19.9-Rectosigmoid junction	Moderately differentiated; Grade II	10	Blank(s)	Blank(s)	T2	Blank(s)	Blank(s)	N0	Blank(s)	Blank(s)	Blank(s)	Blank(s)	Blank(s)	Blank(s)	Blank(s)	Blank(s)	Blank(s)	Blank(s)	1	0	Blank(s)	No radiation and/or cancer-directed surgery	None	Alive or dead of other cause	Dead (attributable to causes other than this cancer dx)	93	Accidents and Adverse Effects	One primary only	September	No/Unknown
1878029	1992	Male	44	White	Married (including common law)	Rectum	8140/3: Adenocarcinoma, NOS	C20.9-Rectum, NOS	Moderately differentiated; Grade II	10	Blank(s)	Blank(s)	T2	Blank(s)	Blank(s)	N0	Blank(s)	Blank(s)	Blank(s)	Blank(s)	Blank(s)	Blank(s)	Blank(s)	Blank(s)	Blank(s)	Blank(s)	2	0	Blank(s)	No radiation and/or cancer-directed surgery	None	Alive or dead of other cause	Alive or dead due to cancer	263	Alive	One primary only	January	No/Unknown
1878356	1988	Male	79	White	Widowed	Rectum	8140/3: Adenocarcinoma, NOS	C20.9-Rectum, NOS	Poorly differentiated; Grade III	20	Blank(s)	Blank(s)	T3	Blank(s)	Blank(s)	N0	Blank(s)	Blank(s)	Blank(s)	Blank(s)	Blank(s)	Blank(s)	Blank(s)	Blank(s)	Blank(s)	Blank(s)	10	0	Blank(s)	No radiation and/or cancer-directed surgery	None	Alive or dead of other cause	Dead (attributable to causes other than this cancer dx)	45	Diseases of Heart	One primary only	April	No/Unknown
1878457	1990	Male	71	White	Married (including common law)	Sigmoid Colon	8140/3: Adenocarcinoma, NOS	C18.7-Sigmoid colon	Moderately differentiated; Grade II	10	Blank(s)	Blank(s)	T1	Blank(s)	Blank(s)	N0	Blank(s)	Blank(s)	Blank(s)	Blank(s)	Blank(s)	Blank(s)	Blank(s)	Blank(s)	Blank(s)	Blank(s)	98	0	Blank(s)	No radiation and/or cancer-directed surgery	None	Alive or dead of other cause	Dead (attributable to causes other than this cancer dx)	194	Diseases of Heart	One primary only	April	No/Unknown
1878822	1989	Male	66	White	Married (including common law)	Sigmoid Colon	8140/3: Adenocarcinoma, NOS	C18.7-Sigmoid colon	Moderately differentiated; Grade II	30	Blank(s)	Blank(s)	T4	Blank(s)	Blank(s)	N2	Blank(s)	Blank(s)	Blank(s)	Blank(s)	Blank(s)	Blank(s)	Blank(s)	Blank(s)	Blank(s)	Blank(s)	5	5	Blank(s)	No radiation and/or cancer-directed surgery	None	Dead (attributable to this cancer dx)	Alive or dead due to cancer	36	Colon excluding Rectum	One primary only	January	No/Unknown
1878954	1989	Male	46	White	Single (never married)	Sigmoid Colon	8140/3: Adenocarcinoma, NOS	C18.7-Sigmoid colon	Moderately differentiated; Grade II	20	Blank(s)	Blank(s)	T3	Blank(s)	Blank(s)	N0	Blank(s)	Blank(s)	Blank(s)	Blank(s)	Blank(s)	Blank(s)	Blank(s)	Blank(s)	Blank(s)	Blank(s)	16	0	Blank(s)	No radiation and/or cancer-directed surgery	None	Dead (attributable to this cancer dx)	Alive or dead due to cancer	70	Colon excluding Rectum	One primary only	December	No/Unknown
1879132	1990	Male	73	White	Married (including common law)	Transverse Colon	8140/3: Adenocarcinoma, NOS	C18.4-Transverse colon	Moderately differentiated; Grade II	30	Blank(s)	Blank(s)	T3	Blank(s)	Blank(s)	N3	Blank(s)	Blank(s)	Blank(s)	Blank(s)	Blank(s)	Blank(s)	Blank(s)	Blank(s)	Blank(s)	Blank(s)	8	1	Blank(s)	No radiation and/or cancer-directed surgery	None	Alive or dead of other cause	Dead (attributable to causes other than this cancer dx)	42	Diseases of Heart	One primary only	November	Yes
1879189	1988	Male	49	White	Divorced	Rectum	8140/3: Adenocarcinoma, NOS	C20.9-Rectum, NOS	Moderately differentiated; Grade II	30	Blank(s)	Blank(s)	T4	Blank(s)	Blank(s)	N1	Blank(s)	Blank(s)	Blank(s)	Blank(s)	Blank(s)	Blank(s)	Blank(s)	Blank(s)	Blank(s)	Blank(s)	5	3	Blank(s)	Radiation prior to surgery	Beam radiation	Dead (attributable to this cancer dx)	Alive or dead due to cancer	34	Rectum and Rectosigmoid Junction	One primary only	December	Yes
1879205	1990	Female	55	White	Divorced	Rectosigmoid Junction	8140/3: Adenocarcinoma, NOS	C19.9-Rectosigmoid junction	Moderately differentiated; Grade II	10	Blank(s)	Blank(s)	T2	Blank(s)	Blank(s)	N0	Blank(s)	Blank(s)	Blank(s)	Blank(s)	Blank(s)	Blank(s)	Blank(s)	Blank(s)	Blank(s)	Blank(s)	9	0	Blank(s)	No radiation and/or cancer-directed surgery	None	Alive or dead of other cause	Alive or dead due to cancer	285	Alive	One primary only	March	No/Unknown
1879234	1988	Female	78	White	Single (never married)	Rectum	8140/3: Adenocarcinoma, NOS	C20.9-Rectum, NOS	Moderately differentiated; Grade II	20	Blank(s)	Blank(s)	T3	Blank(s)	Blank(s)	N0	Blank(s)	Blank(s)	Blank(s)	Blank(s)	Blank(s)	Blank(s)	Blank(s)	Blank(s)	Blank(s)	Blank(s)	7	0	Blank(s)	No radiation and/or cancer-directed surgery	None	Dead (attributable to this cancer dx)	Alive or dead due to cancer	77	Colon excluding Rectum	One primary only	August	No/Unknown
1879255	1989	Female	78	White	Widowed	Rectum	8140/3: Adenocarcinoma, NOS	C20.9-Rectum, NOS	Poorly differentiated; Grade III	30	Blank(s)	Blank(s)	T3	Blank(s)	Blank(s)	N1	Blank(s)	Blank(s)	Blank(s)	Blank(s)	Blank(s)	Blank(s)	Blank(s)	Blank(s)	Blank(s)	Blank(s)	98	2	Blank(s)	No radiation and/or cancer-directed surgery	None	Dead (attributable to this cancer dx)	Alive or dead due to cancer	27	Colon excluding Rectum	One primary only	January	No/Unknown
1879263	1991	Male	58	White	Married (including common law)	Rectum	8140/3: Adenocarcinoma, NOS	C20.9-Rectum, NOS	Moderately differentiated; Grade II	20	Blank(s)	Blank(s)	T3	Blank(s)	Blank(s)	N0	Blank(s)	Blank(s)	Blank(s)	Blank(s)	Blank(s)	Blank(s)	Blank(s)	Blank(s)	Blank(s)	Blank(s)	6	0	Blank(s)	Radiation after surgery	Beam radiation	Dead (attributable to this cancer dx)	Alive or dead due to cancer	55	Rectum and Rectosigmoid Junction	One primary only	November	Yes
1879334	1988	Male	66	White	Married (including common law)	Transverse Colon	8140/3: Adenocarcinoma, NOS	C18.4-Transverse colon	Moderately differentiated; Grade II	30	Blank(s)	Blank(s)	T4	Blank(s)	Blank(s)	N3	Blank(s)	Blank(s)	Blank(s)	Blank(s)	Blank(s)	Blank(s)	Blank(s)	Blank(s)	Blank(s)	Blank(s)	98	97	Blank(s)	No radiation and/or cancer-directed surgery	None	Dead (attributable to this cancer dx)	Alive or dead due to cancer	4	Colon excluding Rectum	One primary only	October	No/Unknown
1879369	1991	Male	77	White	Married (including common law)	Sigmoid Colon	8140/3: Adenocarcinoma, NOS	C18.7-Sigmoid colon	Moderately differentiated; Grade II	10	Blank(s)	Blank(s)	T1	Blank(s)	Blank(s)	N0	Blank(s)	Blank(s)	Blank(s)	Blank(s)	Blank(s)	Blank(s)	Blank(s)	Blank(s)	Blank(s)	Blank(s)	5	0	Blank(s)	No radiation and/or cancer-directed surgery	None	Alive or dead of other cause	Dead (attributable to causes other than this cancer dx)	178	State DC not available or state DC available but no COD	One primary only	June	No/Unknown
1879581	1990	Male	76	White	Married (including common law)	Sigmoid Colon	8140/3: Adenocarcinoma, NOS	C18.7-Sigmoid colon	Well differentiated; Grade I	20	Blank(s)	Blank(s)	T3	Blank(s)	Blank(s)	N0	Blank(s)	Blank(s)	Blank(s)	Blank(s)	Blank(s)	Blank(s)	Blank(s)	Blank(s)	Blank(s)	Blank(s)	3	0	Blank(s)	No radiation and/or cancer-directed surgery	None	Dead (attributable to this cancer dx)	Alive or dead due to cancer	22	Colon excluding Rectum	One primary only	June	No/Unknown
1879611	1990	Female	49	Black	Single (never married)	Sigmoid Colon	8480/3: Mucinous adenocarcinoma	C18.7-Sigmoid colon	Moderately differentiated; Grade II	30	Blank(s)	Blank(s)	T3	Blank(s)	Blank(s)	N2	Blank(s)	Blank(s)	Blank(s)	Blank(s)	Blank(s)	Blank(s)	Blank(s)	Blank(s)	Blank(s)	Blank(s)	16	5	Blank(s)	No radiation and/or cancer-directed surgery	None	Alive or dead of other cause	Alive or dead due to cancer	280	Alive	One primary only	August	Yes
1879659	1992	Male	46	White	Divorced	Rectum	8140/3: Adenocarcinoma, NOS	C20.9-Rectum, NOS	Moderately differentiated; Grade II	30	Blank(s)	Blank(s)	T3	Blank(s)	Blank(s)	N1	Blank(s)	Blank(s)	Blank(s)	Blank(s)	Blank(s)	Blank(s)	Blank(s)	Blank(s)	Blank(s)	Blank(s)	9	3	Blank(s)	Radiation after surgery	Beam radiation	Dead (attributable to this cancer dx)	Alive or dead due to cancer	68	Colon excluding Rectum	One primary only	March	Yes
1879683	1991	Male	78	White	Widowed	Rectosigmoid Junction	8140/3: Adenocarcinoma, NOS	C19.9-Rectosigmoid junction	Moderately differentiated; Grade II	20	Blank(s)	Blank(s)	T3	Blank(s)	Blank(s)	N0	Blank(s)	Blank(s)	Blank(s)	Blank(s)	Blank(s)	Blank(s)	Blank(s)	Blank(s)	Blank(s)	Blank(s)	13	0	Blank(s)	No radiation and/or cancer-directed surgery	None	Dead (attributable to this cancer dx)	Alive or dead due to cancer	17	Colon excluding Rectum	One primary only	August	No/Unknown
1879730	1991	Male	67	White	Married (including common law)	Transverse Colon	8140/3: Adenocarcinoma, NOS	C18.4-Transverse colon	Moderately differentiated; Grade II	20	Blank(s)	Blank(s)	T3	Blank(s)	Blank(s)	N0	Blank(s)	Blank(s)	Blank(s)	Blank(s)	Blank(s)	Blank(s)	Blank(s)	Blank(s)	Blank(s)	Blank(s)	13	0	Blank(s)	No radiation and/or cancer-directed surgery	None	Dead (attributable to this cancer dx)	Alive or dead due to cancer	150	In situ, benign or unknown behavior neoplasm	One primary only	June	Yes
1879778	1988	Male	55	White	Married (including common law)	Rectum	8140/3: Adenocarcinoma, NOS	C20.9-Rectum, NOS	Moderately differentiated; Grade II	10	Blank(s)	Blank(s)	T1	Blank(s)	Blank(s)	N0	Blank(s)	Blank(s)	Blank(s)	Blank(s)	Blank(s)	Blank(s)	Blank(s)	Blank(s)	Blank(s)	Blank(s)	13	0	Blank(s)	No radiation and/or cancer-directed surgery	None	Alive or dead of other cause	Alive or dead due to cancer	308	Alive	One primary only	April	No/Unknown
1880214	1988	Male	69	White	Married (including common law)	Rectum	8140/3: Adenocarcinoma, NOS	C20.9-Rectum, NOS	Moderately differentiated; Grade II	20	Blank(s)	Blank(s)	T3	Blank(s)	Blank(s)	N0	Blank(s)	Blank(s)	Blank(s)	Blank(s)	Blank(s)	Blank(s)	Blank(s)	Blank(s)	Blank(s)	Blank(s)	12	0	Blank(s)	No radiation and/or cancer-directed surgery	None	Dead (attributable to this cancer dx)	Alive or dead due to cancer	35	Rectum and Rectosigmoid Junction	One primary only	September	No/Unknown
1880389	1990	Female	80	White	Married (including common law)	Rectosigmoid Junction	8140/3: Adenocarcinoma, NOS	C19.9-Rectosigmoid junction	Moderately differentiated; Grade II	10	Blank(s)	Blank(s)	T1	Blank(s)	Blank(s)	N0	Blank(s)	Blank(s)	Blank(s)	Blank(s)	Blank(s)	Blank(s)	Blank(s)	Blank(s)	Blank(s)	Blank(s)	6	0	Blank(s)	No radiation and/or cancer-directed surgery	None	Alive or dead of other cause	Dead (attributable to causes other than this cancer dx)	196	Other Cause of Death	One primary only	September	No/Unknown
1880416	1990	Female	45	White	Married (including common law)	Sigmoid Colon	8140/3: Adenocarcinoma, NOS	C18.7-Sigmoid colon	Well differentiated; Grade I	20	Blank(s)	Blank(s)	T3	Blank(s)	Blank(s)	N0	Blank(s)	Blank(s)	Blank(s)	Blank(s)	Blank(s)	Blank(s)	Blank(s)	Blank(s)	Blank(s)	Blank(s)	13	0	Blank(s)	No radiation and/or cancer-directed surgery	None	Alive or dead of other cause	Alive or dead due to cancer	286	Alive	One primary only	February	No/Unknown
1880669	1992	Female	68	White	Married (including common law)	Sigmoid Colon	8140/3: Adenocarcinoma, NOS	C18.7-Sigmoid colon	Moderately differentiated; Grade II	10	Blank(s)	Blank(s)	T1	Blank(s)	Blank(s)	N0	Blank(s)	Blank(s)	Blank(s)	Blank(s)	Blank(s)	Blank(s)	Blank(s)	Blank(s)	Blank(s)	Blank(s)	5	0	Blank(s)	No radiation and/or cancer-directed surgery	None	Dead (attributable to this cancer dx)	Alive or dead due to cancer	155	Colon excluding Rectum	One primary only	May	No/Unknown
1880799	1988	Male	59	White	Married (including common law)	Rectum	8140/3: Adenocarcinoma, NOS	C20.9-Rectum, NOS	Poorly differentiated; Grade III	20	Blank(s)	Blank(s)	T3	Blank(s)	Blank(s)	N0	Blank(s)	Blank(s)	Blank(s)	Blank(s)	Blank(s)	Blank(s)	Blank(s)	Blank(s)	Blank(s)	Blank(s)	9	0	Blank(s)	Radiation before and after surgery	Beam radiation	Dead (attributable to this cancer dx)	Alive or dead due to cancer	128	Other Cause of Death	One primary only	April	No/Unknown
1881320	1991	Male	61	Black	Married (including common law)	Cecum	8140/3: Adenocarcinoma, NOS	C18.0-Cecum	Moderately differentiated; Grade II	20	Blank(s)	Blank(s)	T3	Blank(s)	Blank(s)	N0	Blank(s)	Blank(s)	Blank(s)	Blank(s)	Blank(s)	Blank(s)	Blank(s)	Blank(s)	Blank(s)	Blank(s)	20	0	Blank(s)	No radiation and/or cancer-directed surgery	None	Alive or dead of other cause	Alive or dead due to cancer	267	Alive	One primary only	September	No/Unknown
1881379	1991	Female	55	Black	Married (including common law)	Sigmoid Colon	8480/3: Mucinous adenocarcinoma	C18.7-Sigmoid colon	Well differentiated; Grade I	20	Blank(s)	Blank(s)	T3	Blank(s)	Blank(s)	N0	Blank(s)	Blank(s)	Blank(s)	Blank(s)	Blank(s)	Blank(s)	Blank(s)	Blank(s)	Blank(s)	Blank(s)	17	0	Blank(s)	No radiation and/or cancer-directed surgery	None	Alive or dead of other cause	Alive or dead due to cancer	270	Alive	One primary only	June	No/Unknown
1881384	1991	Male	74	White	Married (including common law)	Hepatic Flexure	8140/3: Adenocarcinoma, NOS	C18.3-Hepatic flexure of colon	Moderately differentiated; Grade II	20	Blank(s)	Blank(s)	T3	Blank(s)	Blank(s)	N0	Blank(s)	Blank(s)	Blank(s)	Blank(s)	Blank(s)	Blank(s)	Blank(s)	Blank(s)	Blank(s)	Blank(s)	10	0	Blank(s)	No radiation and/or cancer-directed surgery	None	Alive or dead of other cause	Dead (attributable to causes other than this cancer dx)	114	Diabetes Mellitus	One primary only	September	No/Unknown
1881388	1990	Female	50	Black	Single (never married)	Splenic Flexure	8140/3: Adenocarcinoma, NOS	C18.5-Splenic flexure of colon	Moderately differentiated; Grade II	20	Blank(s)	Blank(s)	T3	Blank(s)	Blank(s)	N0	Blank(s)	Blank(s)	Blank(s)	Blank(s)	Blank(s)	Blank(s)	Blank(s)	Blank(s)	Blank(s)	Blank(s)	98	0	Blank(s)	No radiation and/or cancer-directed surgery	None	Alive or dead of other cause	Dead (attributable to causes other than this cancer dx)	80	Homicide and Legal Intervention	One primary only	December	No/Unknown
1881536	1988	Female	77	White	Divorced	Rectum	8140/3: Adenocarcinoma, NOS	C20.9-Rectum, NOS	Poorly differentiated; Grade III	10	Blank(s)	Blank(s)	T2	Blank(s)	Blank(s)	N0	Blank(s)	Blank(s)	Blank(s)	Blank(s)	Blank(s)	Blank(s)	Blank(s)	Blank(s)	Blank(s)	Blank(s)	2	0	Blank(s)	No radiation and/or cancer-directed surgery	None	Dead (attributable to this cancer dx)	Alive or dead due to cancer	66	Rectum and Rectosigmoid Junction	One primary only	October	No/Unknown
1881549	1991	Male	77	White	Married (including common law)	Hepatic Flexure	8140/3: Adenocarcinoma, NOS	C18.3-Hepatic flexure of colon	Moderately differentiated; Grade II	10	Blank(s)	Blank(s)	T1	Blank(s)	Blank(s)	N0	Blank(s)	Blank(s)	Blank(s)	Blank(s)	Blank(s)	Blank(s)	Blank(s)	Blank(s)	Blank(s)	Blank(s)	9	0	Blank(s)	No radiation and/or cancer-directed surgery	None	Dead (attributable to this cancer dx)	Alive or dead due to cancer	36	Colon excluding Rectum	One primary only	September	No/Unknown
1881553	1990	Female	71	Asian or Pacific Islander	Widowed	Hepatic Flexure	8140/3: Adenocarcinoma, NOS	C18.3-Hepatic flexure of colon	Moderately differentiated; Grade II	20	Blank(s)	Blank(s)	T3	Blank(s)	Blank(s)	N0	Blank(s)	Blank(s)	Blank(s)	Blank(s)	Blank(s)	Blank(s)	Blank(s)	Blank(s)	Blank(s)	Blank(s)	11	0	Blank(s)	No radiation and/or cancer-directed surgery	None	Alive or dead of other cause	Dead (attributable to causes other than this cancer dx)	126	Diseases of Heart	One primary only	September	No/Unknown
1881559	1990	Female	52	Asian or Pacific Islander	Married (including common law)	Sigmoid Colon	8140/3: Adenocarcinoma, NOS	C18.7-Sigmoid colon	Moderately differentiated; Grade II	20	Blank(s)	Blank(s)	T3	Blank(s)	Blank(s)	N0	Blank(s)	Blank(s)	Blank(s)	Blank(s)	Blank(s)	Blank(s)	Blank(s)	Blank(s)	Blank(s)	Blank(s)	8	0	Blank(s)	No radiation and/or cancer-directed surgery	None	Alive or dead of other cause	Alive or dead due to cancer	165	Alive	One primary only	November	No/Unknown
1881591	1990	Female	74	White	Married (including common law)	Descending Colon	8140/3: Adenocarcinoma, NOS	C18.6-Descending colon	Moderately differentiated; Grade II	20	Blank(s)	Blank(s)	T3	Blank(s)	Blank(s)	N0	Blank(s)	Blank(s)	Blank(s)	Blank(s)	Blank(s)	Blank(s)	Blank(s)	Blank(s)	Blank(s)	Blank(s)	4	0	Blank(s)	No radiation and/or cancer-directed surgery	None	Alive or dead of other cause	Dead (attributable to causes other than this cancer dx)	17	Suicide and Self-Inflicted Injury	One primary only	August	No/Unknown
1881654	1991	Female	70	White	Widowed	Descending Colon	8140/3: Adenocarcinoma, NOS	C18.6-Descending colon	Moderately differentiated; Grade II	20	Blank(s)	Blank(s)	T3	Blank(s)	Blank(s)	N0	Blank(s)	Blank(s)	Blank(s)	Blank(s)	Blank(s)	Blank(s)	Blank(s)	Blank(s)	Blank(s)	Blank(s)	10	0	Blank(s)	No radiation and/or cancer-directed surgery	None	Alive or dead of other cause	Dead (attributable to causes other than this cancer dx)	160	Symptoms, Signs and Ill-Defined Conditions	One primary only	December	No/Unknown
1881692	1988	Male	73	White	Married (including common law)	Ascending Colon	8140/3: Adenocarcinoma, NOS	C18.2-Ascending colon	Moderately differentiated; Grade II	20	Blank(s)	Blank(s)	T3	Blank(s)	Blank(s)	N0	Blank(s)	Blank(s)	Blank(s)	Blank(s)	Blank(s)	Blank(s)	Blank(s)	Blank(s)	Blank(s)	Blank(s)	41	0	Blank(s)	No radiation and/or cancer-directed surgery	None	Alive or dead of other cause	Dead (attributable to causes other than this cancer dx)	157	Diseases of Heart	One primary only	September	No/Unknown
1881705	1992	Male	77	White	Married (including common law)	Splenic Flexure	8140/3: Adenocarcinoma, NOS	C18.5-Splenic flexure of colon	Moderately differentiated; Grade II	10	Blank(s)	Blank(s)	T2	Blank(s)	Blank(s)	N0	Blank(s)	Blank(s)	Blank(s)	Blank(s)	Blank(s)	Blank(s)	Blank(s)	Blank(s)	Blank(s)	Blank(s)	13	0	Blank(s)	No radiation and/or cancer-directed surgery	None	Dead (attributable to this cancer dx)	Alive or dead due to cancer	229	Non-Hodgkin Lymphoma	One primary only	January	No/Unknown
1881713	1990	Female	64	White	Widowed	Cecum	8140/3: Adenocarcinoma, NOS	C18.0-Cecum	Moderately differentiated; Grade II	30	Blank(s)	Blank(s)	T3	Blank(s)	Blank(s)	N1	Blank(s)	Blank(s)	Blank(s)	Blank(s)	Blank(s)	Blank(s)	Blank(s)	Blank(s)	Blank(s)	Blank(s)	12	1	Blank(s)	No radiation and/or cancer-directed surgery	None	Dead (attributable to this cancer dx)	Alive or dead due to cancer	13	Other Digestive Organs	One primary only	January	Yes
1881742	1990	Female	71	White	Married (including common law)	Cecum	8140/3: Adenocarcinoma, NOS	C18.0-Cecum	Moderately differentiated; Grade II	30	Blank(s)	Blank(s)	T3	Blank(s)	Blank(s)	N3	Blank(s)	Blank(s)	Blank(s)	Blank(s)	Blank(s)	Blank(s)	Blank(s)	Blank(s)	Blank(s)	Blank(s)	21	4	Blank(s)	No radiation and/or cancer-directed surgery	None	Dead (attributable to this cancer dx)	Alive or dead due to cancer	27	Colon excluding Rectum	One primary only	July	Yes
1881838	1990	Female	43	Asian or Pacific Islander	Divorced	Rectosigmoid Junction	8140/3: Adenocarcinoma, NOS	C19.9-Rectosigmoid junction	Moderately differentiated; Grade II	10	Blank(s)	Blank(s)	T2	Blank(s)	Blank(s)	N0	Blank(s)	Blank(s)	Blank(s)	Blank(s)	Blank(s)	Blank(s)	Blank(s)	Blank(s)	Blank(s)	Blank(s)	20	0	Blank(s)	No radiation and/or cancer-directed surgery	None	Alive or dead of other cause	Alive or dead due to cancer	284	Alive	One primary only	April	No/Unknown
1881959	1990	Male	60	Black	Single (never married)	Ascending Colon	8140/3: Adenocarcinoma, NOS	C18.2-Ascending colon	Moderately differentiated; Grade II	10	Blank(s)	Blank(s)	T2	Blank(s)	Blank(s)	N0	Blank(s)	Blank(s)	Blank(s)	Blank(s)	Blank(s)	Blank(s)	Blank(s)	Blank(s)	Blank(s)	Blank(s)	11	0	Blank(s)	No radiation and/or cancer-directed surgery	None	Alive or dead of other cause	Dead (attributable to causes other than this cancer dx)	20	Other Cause of Death	One primary only	August	No/Unknown
1882038	1988	Male	78	White	Married (including common law)	Hepatic Flexure	8480/3: Mucinous adenocarcinoma	C18.3-Hepatic flexure of colon	Moderately differentiated; Grade II	20	Blank(s)	Blank(s)	T3	Blank(s)	Blank(s)	N0	Blank(s)	Blank(s)	Blank(s)	Blank(s)	Blank(s)	Blank(s)	Blank(s)	Blank(s)	Blank(s)	Blank(s)	3	0	Blank(s)	No radiation and/or cancer-directed surgery	None	Alive or dead of other cause	Dead (attributable to causes other than this cancer dx)	257	Diseases of Heart	One primary only	July	No/Unknown
1882091	1989	Male	50	White	Married (including common law)	Cecum	8490/3: Signet ring cell carcinoma	C18.0-Cecum	Poorly differentiated; Grade III	30	Blank(s)	Blank(s)	T3	Blank(s)	Blank(s)	N2	Blank(s)	Blank(s)	Blank(s)	Blank(s)	Blank(s)	Blank(s)	Blank(s)	Blank(s)	Blank(s)	Blank(s)	17	11	Blank(s)	No radiation and/or cancer-directed surgery	None	Dead (attributable to this cancer dx)	Alive or dead due to cancer	18	Colon excluding Rectum	One primary only	November	Yes
1882276	1990	Male	67	White	Married (including common law)	Rectum	8140/3: Adenocarcinoma, NOS	C20.9-Rectum, NOS	Poorly differentiated; Grade III	10	Blank(s)	Blank(s)	T2	Blank(s)	Blank(s)	N0	Blank(s)	Blank(s)	Blank(s)	Blank(s)	Blank(s)	Blank(s)	Blank(s)	Blank(s)	Blank(s)	Blank(s)	3	0	Blank(s)	No radiation and/or cancer-directed surgery	None	Alive or dead of other cause	Dead (attributable to causes other than this cancer dx)	88	Diseases of Heart	One primary only	June	No/Unknown
1882349	1991	Female	68	Asian or Pacific Islander	Married (including common law)	Rectum	8140/3: Adenocarcinoma, NOS	C20.9-Rectum, NOS	Moderately differentiated; Grade II	30	Blank(s)	Blank(s)	T3	Blank(s)	Blank(s)	N1	Blank(s)	Blank(s)	Blank(s)	Blank(s)	Blank(s)	Blank(s)	Blank(s)	Blank(s)	Blank(s)	Blank(s)	10	2	Blank(s)	No radiation and/or cancer-directed surgery	None	Alive or dead of other cause	Alive or dead due to cancer	273	Alive	One primary only	March	No/Unknown
1882390	1990	Female	72	White	Married (including common law)	Ascending Colon	8140/3: Adenocarcinoma, NOS	C18.2-Ascending colon	Well differentiated; Grade I	20	Blank(s)	Blank(s)	T3	Blank(s)	Blank(s)	N0	Blank(s)	Blank(s)	Blank(s)	Blank(s)	Blank(s)	Blank(s)	Blank(s)	Blank(s)	Blank(s)	Blank(s)	18	0	Blank(s)	No radiation and/or cancer-directed surgery	None	Alive or dead of other cause	Dead (attributable to causes other than this cancer dx)	194	Diseases of Heart	One primary only	May	No/Unknown
1882395	1988	Male	70	White	Married (including common law)	Rectosigmoid Junction	8140/3: Adenocarcinoma, NOS	C19.9-Rectosigmoid junction	Moderately differentiated; Grade II	20	Blank(s)	Blank(s)	T4	Blank(s)	Blank(s)	N0	Blank(s)	Blank(s)	Blank(s)	Blank(s)	Blank(s)	Blank(s)	Blank(s)	Blank(s)	Blank(s)	Blank(s)	22	0	Blank(s)	No radiation and/or cancer-directed surgery	None	Alive or dead of other cause	Dead (attributable to causes other than this cancer dx)	181	Diabetes Mellitus	One primary only	September	No/Unknown
1882512	1991	Male	71	White	Widowed	Hepatic Flexure	8140/3: Adenocarcinoma, NOS	C18.3-Hepatic flexure of colon	Moderately differentiated; Grade II	20	Blank(s)	Blank(s)	T3	Blank(s)	Blank(s)	N0	Blank(s)	Blank(s)	Blank(s)	Blank(s)	Blank(s)	Blank(s)	Blank(s)	Blank(s)	Blank(s)	Blank(s)	15	0	Blank(s)	No radiation and/or cancer-directed surgery	None	Dead (attributable to this cancer dx)	Alive or dead due to cancer	30	Colon excluding Rectum	One primary only	March	No/Unknown
1882570	1990	Female	61	White	Single (never married)	Rectum	8140/3: Adenocarcinoma, NOS	C20.9-Rectum, NOS	Moderately differentiated; Grade II	10	Blank(s)	Blank(s)	T1	Blank(s)	Blank(s)	N0	Blank(s)	Blank(s)	Blank(s)	Blank(s)	Blank(s)	Blank(s)	Blank(s)	Blank(s)	Blank(s)	Blank(s)	11	0	Blank(s)	No radiation and/or cancer-directed surgery	None	Alive or dead of other cause	Dead (attributable to causes other than this cancer dx)	168	Cerebrovascular Diseases	One primary only	September	No/Unknown
1882723	1990	Male	59	White	Married (including common law)	Rectum	8481/3: Mucin-producing adenocarcinoma	C20.9-Rectum, NOS	Moderately differentiated; Grade II	10	Blank(s)	Blank(s)	T2	Blank(s)	Blank(s)	N0	Blank(s)	Blank(s)	Blank(s)	Blank(s)	Blank(s)	Blank(s)	Blank(s)	Blank(s)	Blank(s)	Blank(s)	12	0	Blank(s)	No radiation and/or cancer-directed surgery	None	Alive or dead of other cause	Dead (attributable to causes other than this cancer dx)	24	Diseases of Heart	One primary only	October	No/Unknown
1882763	1991	Female	77	White	Married (including common law)	Ascending Colon	8140/3: Adenocarcinoma, NOS	C18.2-Ascending colon	Moderately differentiated; Grade II	20	Blank(s)	Blank(s)	T3	Blank(s)	Blank(s)	N0	Blank(s)	Blank(s)	Blank(s)	Blank(s)	Blank(s)	Blank(s)	Blank(s)	Blank(s)	Blank(s)	Blank(s)	19	0	Blank(s)	No radiation and/or cancer-directed surgery	None	Alive or dead of other cause	Dead (attributable to causes other than this cancer dx)	83	Diseases of Heart	One primary only	March	No/Unknown
1882850	1991	Female	80	Asian or Pacific Islander	Widowed	Rectosigmoid Junction	8140/3: Adenocarcinoma, NOS	C19.9-Rectosigmoid junction	Moderately differentiated; Grade II	30	Blank(s)	Blank(s)	T3	Blank(s)	Blank(s)	N1	Blank(s)	Blank(s)	Blank(s)	Blank(s)	Blank(s)	Blank(s)	Blank(s)	Blank(s)	Blank(s)	Blank(s)	27	2	Blank(s)	No radiation and/or cancer-directed surgery	None	Dead (attributable to this cancer dx)	Alive or dead due to cancer	59	Colon excluding Rectum	One primary only	April	No/Unknown
1883045	1989	Male	54	White	Single (never married)	Hepatic Flexure	8140/3: Adenocarcinoma, NOS	C18.3-Hepatic flexure of colon	Well differentiated; Grade I	20	Blank(s)	Blank(s)	T3	Blank(s)	Blank(s)	N0	Blank(s)	Blank(s)	Blank(s)	Blank(s)	Blank(s)	Blank(s)	Blank(s)	Blank(s)	Blank(s)	Blank(s)	10	0	Blank(s)	No radiation and/or cancer-directed surgery	None	Alive or dead of other cause	Dead (attributable to causes other than this cancer dx)	193	Chronic Liver Disease and Cirrhosis	One primary only	February	No/Unknown
1883116	1990	Female	73	White	Widowed	Cecum	8140/3: Adenocarcinoma, NOS	C18.0-Cecum	Poorly differentiated; Grade III	20	Blank(s)	Blank(s)	T3	Blank(s)	Blank(s)	N0	Blank(s)	Blank(s)	Blank(s)	Blank(s)	Blank(s)	Blank(s)	Blank(s)	Blank(s)	Blank(s)	Blank(s)	8	0	Blank(s)	No radiation and/or cancer-directed surgery	None	Alive or dead of other cause	Dead (attributable to causes other than this cancer dx)	175	Other Cause of Death	One primary only	November	No/Unknown
1883181	1990	Female	72	Asian or Pacific Islander	Widowed	Rectum	8140/3: Adenocarcinoma, NOS	C20.9-Rectum, NOS	Poorly differentiated; Grade III	20	Blank(s)	Blank(s)	T3	Blank(s)	Blank(s)	N0	Blank(s)	Blank(s)	Blank(s)	Blank(s)	Blank(s)	Blank(s)	Blank(s)	Blank(s)	Blank(s)	Blank(s)	20	0	Blank(s)	No radiation and/or cancer-directed surgery	None	Alive or dead of other cause	Dead (attributable to causes other than this cancer dx)	129	Chronic Liver Disease and Cirrhosis	One primary only	September	No/Unknown
1883212	1988	Male	69	White	Married (including common law)	Sigmoid Colon	8140/3: Adenocarcinoma, NOS	C18.7-Sigmoid colon	Moderately differentiated; Grade II	20	Blank(s)	Blank(s)	T3	Blank(s)	Blank(s)	N0	Blank(s)	Blank(s)	Blank(s)	Blank(s)	Blank(s)	Blank(s)	Blank(s)	Blank(s)	Blank(s)	Blank(s)	5	0	Blank(s)	No radiation and/or cancer-directed surgery	None	Alive or dead of other cause	Dead (attributable to causes other than this cancer dx)	123	Diseases of Heart	One primary only	September	Yes
1883293	1988	Male	62	White	Married (including common law)	Rectum	8140/3: Adenocarcinoma, NOS	C20.9-Rectum, NOS	Moderately differentiated; Grade II	20	Blank(s)	Blank(s)	T3	Blank(s)	Blank(s)	N0	Blank(s)	Blank(s)	Blank(s)	Blank(s)	Blank(s)	Blank(s)	Blank(s)	Blank(s)	Blank(s)	Blank(s)	8	0	Blank(s)	Radiation prior to surgery	Beam radiation	Alive or dead of other cause	Dead (attributable to causes other than this cancer dx)	167	Chronic Obstructive Pulmonary Disease and Allied Cond	One primary only	August	No/Unknown
1883368	1991	Female	70	White	Married (including common law)	Sigmoid Colon	8140/3: Adenocarcinoma, NOS	C18.7-Sigmoid colon	Moderately differentiated; Grade II	10	Blank(s)	Blank(s)	T2	Blank(s)	Blank(s)	N0	Blank(s)	Blank(s)	Blank(s)	Blank(s)	Blank(s)	Blank(s)	Blank(s)	Blank(s)	Blank(s)	Blank(s)	3	0	Blank(s)	No radiation and/or cancer-directed surgery	None	Alive or dead of other cause	Dead (attributable to causes other than this cancer dx)	188	State DC not available or state DC available but no COD	One primary only	October	No/Unknown
1883403	1990	Female	77	White	Widowed	Sigmoid Colon	8140/3: Adenocarcinoma, NOS	C18.7-Sigmoid colon	Poorly differentiated; Grade III	20	Blank(s)	Blank(s)	T4	Blank(s)	Blank(s)	N0	Blank(s)	Blank(s)	Blank(s)	Blank(s)	Blank(s)	Blank(s)	Blank(s)	Blank(s)	Blank(s)	Blank(s)	2	0	Blank(s)	No radiation and/or cancer-directed surgery	None	Dead (attributable to this cancer dx)	Alive or dead due to cancer	47	Colon excluding Rectum	One primary only	October	No/Unknown
1883442	1991	Male	64	White	Married (including common law)	Rectum	8140/3: Adenocarcinoma, NOS	C20.9-Rectum, NOS	Moderately differentiated; Grade II	20	Blank(s)	Blank(s)	T3	Blank(s)	Blank(s)	N0	Blank(s)	Blank(s)	Blank(s)	Blank(s)	Blank(s)	Blank(s)	Blank(s)	Blank(s)	Blank(s)	Blank(s)	8	0	Blank(s)	Radiation after surgery	Beam radiation	Alive or dead of other cause	Alive or dead due to cancer	264	Alive	One primary only	December	Yes
[truncated: 71,508 more rows]
