# Supplementary material for: Impact of old age on resectable colorectal cancer outcomes
Source: PeerJ journal article supplement (doi:10.7717/peerj.6350), 2019-02-15
Supplement: Supplemental_Figure_S2.pdf [file Supplemental_Figure_S2.pdf]

Subgroup

HR(95%CI)

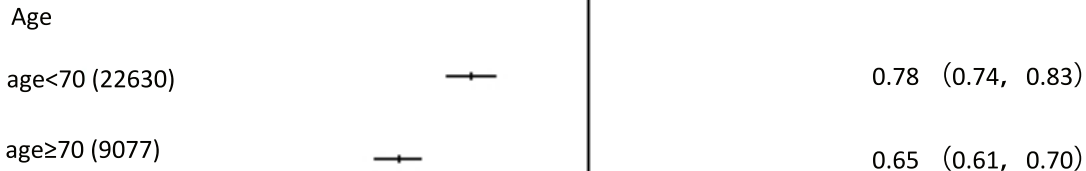

0.4 0.5 0.6 0.7 1 1.1

Favorite Chemotherapy

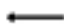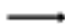

Favorite Without Chemorapy
