# Supplementary material for: Impact of old age on resectable colorectal cancer outcomes
Source: PeerJ journal article supplement (doi:10.7717/peerj.6350), 2019-02-15

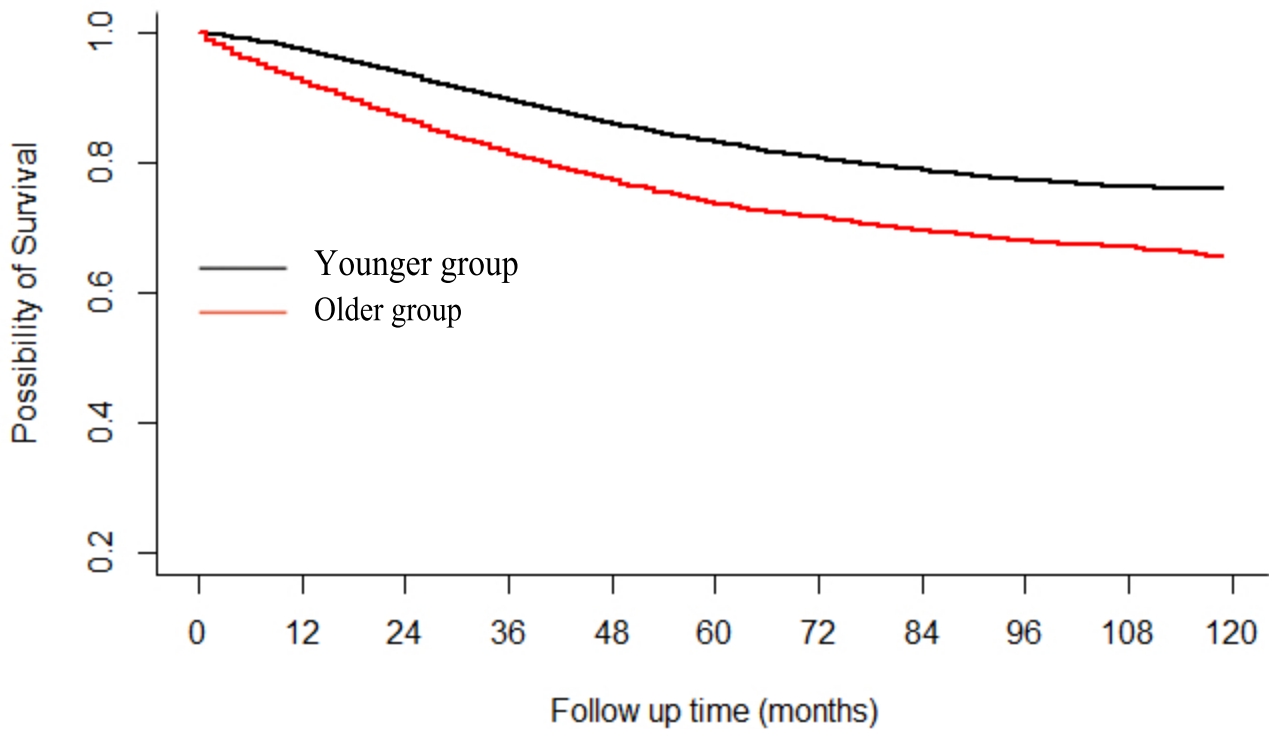

Supplement: Supplemental_Figure_S3.pdf [file Supplemental_Figure_S3.pdf]
