# Supplementary material for: Impact of old age on resectable colorectal cancer outcomes
Source: PeerJ journal article supplement (doi:10.7717/peerj.6350), 2019-02-15
Supplement: Supplemental_Figure_S6.pdf [file Supplemental_Figure_S6.pdf]

## Inclusion and exclusion criteria in SEER (1998-2003)

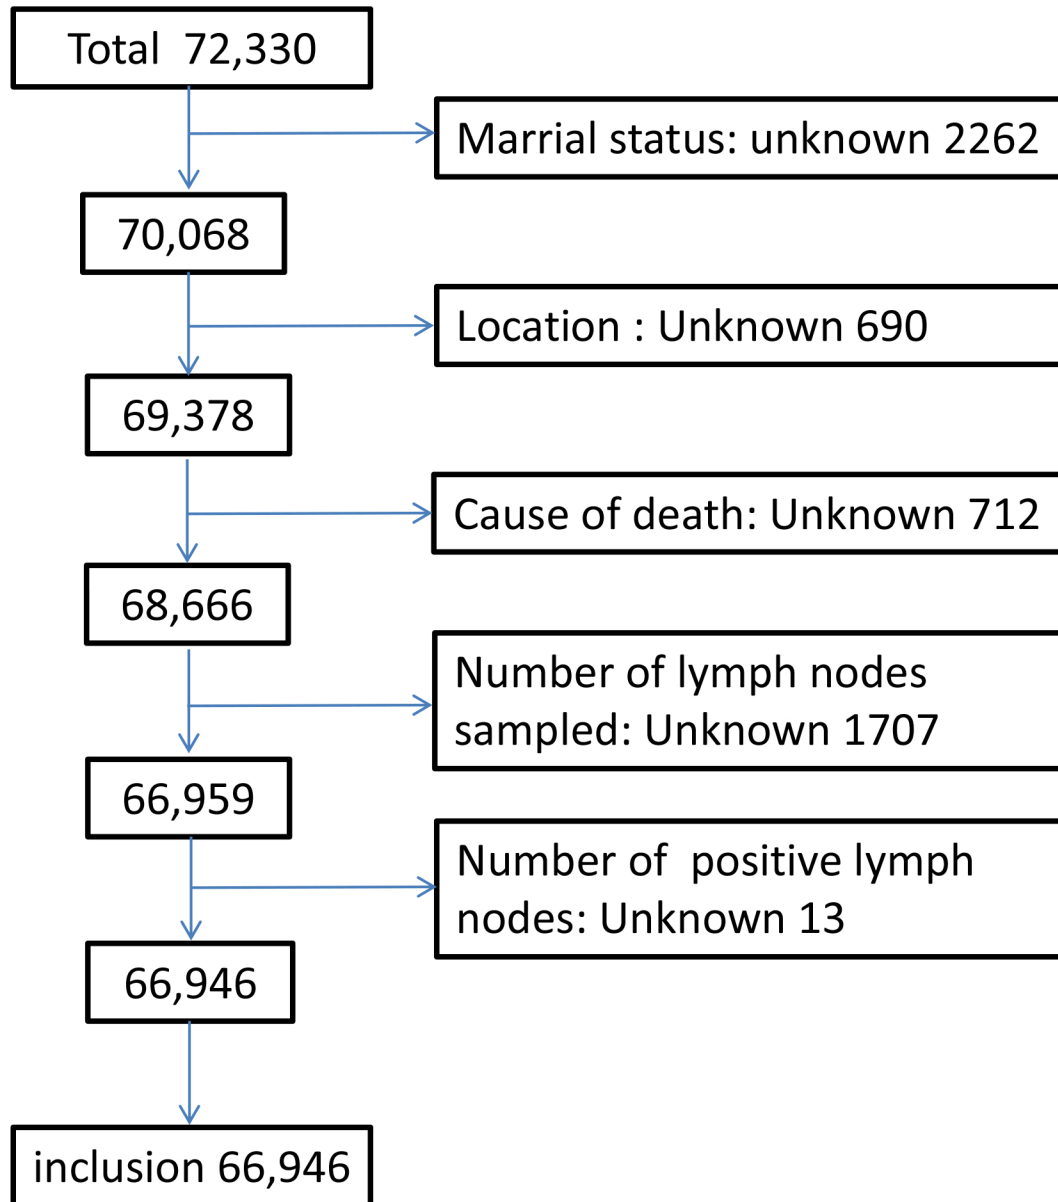

### Selection in SEER

Site recode= Colon and Rectum

Age at diagnosis=20-80

Race=white, black and others

Histology=ICD-O-3 8140, 8480, 8481,84904

Year of diagnosis =1998-2003

Surgery code = 30-80

Survival months  $\geq 1$  months

Primary tumor number = 1

Classification M=M0

Classification N=N0-2

Classification T=T1-4

Grade=well, moderately, poorly
